# Supplementary material for: The prevalence and associated factors of sleep deprivation among healthy college students in China: a cross-sectional survey
Source: PeerJ. 2023 Sep 18;11:e16009. doi: 10.7717/peerj.16009 (PMC10512935; doi:10.7717/peerj.16009)
Supplement: File S1 [file peerj-11-16009-s001.xlsx]

## Sheet: sheet1
	The general information of healthy college students																		The Pittsburgh Sleep Quality Index																												Factors that may affect sleep
Divide into groups（Sleep duration＜7hours=1，Sleep duration≥7hours=2）	1.Number	2.Your current residence	3.Educational level（Junior college=1，College=2，Postgraduate（Masters and Doctorates）=3）	4.Grade（1=Freshman year，2=Freshman yea，3=Junior year，4=Senior year，5=University grade five，6=Postgraduate grade）	5.Gender（Male=1，Female=2）	6.Age(one full year of life)	7.Heigh(cm)	8.Weight(kg)	BMI=（Weight(kg)/Height(cm)*Height(cm)）*10000	9.Nationality[Han=1，Manchu=2，Hui=3，Mongolian=4，Yi ethnic group=5，Tujia=6，Others=7，(The number of people ＜5 ethnic groups are classified as other)]	10.Marital status（Single=1，Married=2）	11.Smoking（No=1，Yes=2）	12.If smoking, the number of cigarettes smoked per day	13.Drinking（1=No，2=Yes）	14.If drinking, frequency of drinking(1=Once a month，2=2-4 times per month，3=2-3 times per week)	15.If drinking, the amount of drinking in a day（1=1or2,2=3or4,3=5or6,4=7-9,5=≥10）	16.Nap duration（1=0-15minutes,2=16-30minutes，3=31-60minutes,4=＞60minutes）	17.Sleep duration on workdays and rest days（1=Same，2=Workdays ＞ Rest days，3=Rest days ＞ Workdays）	1.During the past month, when have you usually gone to bed at night?（Time for the 24-hour system, such as 10:30 p.m., write 22:30）	2.During the past month, how long (in minutes) has it usually take you to fall asleep each night?	3.During the past month, how long (in minutes) has it usually take you to fall asleep each night?（Time for the 24-hour system, such as 7:30 a.m., written as 7:30）	Actual sleep duration(hours)	4.During the past month, how many hours of actual sleep did you get at night? (This may be different than the number of hours you spend in bed.)[1=＜5hours，2=5-6hours(contains 5 hours),3=6-7hours(contains 6 hours),4=7-8hours(contains 7 hours),5=8-9hours(contains 8 hours),6=≥9)]	5.During the past month, how would you rate your sleep quality overall?（0=Very good，1=Fairly good，2=Fairly bad，3=Very bad）	6.During the past month, how often have you taken medicine (prescribed or “over the counter”) to help you sleep?（0=Not during the past month，1=Less than once a week,2=Once or twice a week,3=Three or more times a week)	7.During the past month,do you often feel fatigue?(0=Not during the past month，1=Less than once a week,2=Once or twice a week,3=Three or more times a week)	8.During the past month, how much of a problem has it been for you to keep up enough enthusiasm to get things done?（0=No problem at all，1=Only a very slight problem，2=Somewhat of a problem，3=A very big problem）	9-1.Cannot get to sleep within 30 minutes（0=Not during the past month，1=Less than once a week,2=Once or twice a week,3=Three or more times a week)	9-2.Wake up in the middle of the night or early morning（0=Not during the past month，1=Less than once a week,2=Once or twice a week,3=Three or more times a week)	9-3.Have to get up to use the bathroom（0=Not during the past month，1=Less than once a week,2=Once or twice a week,3=Three or more times a week)	9-4.Cannot breathe comfortably（0=Not during the past month，1=Less than once a week,2=Once or twice a week,3=Three or more times a week)	9-5.Cough or snore loudly（0=Not during the past month，1=Less than once a week,2=Once or twice a week,3=Three or more times a week)	9-6.Feel too hot（0=Not during the past month，1=Less than once a week,2=Once or twice a week,3=Three or more times a week)	9-7.Feel too cold（0=Not during the past month，1=Less than once a week,2=Once or twice a week,3=Three or more times a week)	9-8.Had bad dreams（0=Not during the past month，1=Less than once a week,2=Once or twice a week,3=Three or more times a week)	9-9.Have pain（0=Not during the past month，1=Less than once a week,2=Once or twice a week,3=Three or more times a week)	9-10、Other reason(s)（0=Not during the past month，1=Less than once a week,2=Once or twice a week,3=Three or more times a week)	Please describe	PSQI total score	Sleep quality（Question 5）	Sleep latency（Question 2、Question 9-1）	Sleep duration（Question 4）	Habitual sleep efficiency（Question4/（Question3-Question1）*100%）	Sleep disturbance（Question 9-2 ~ 9-10 sum of scores）	Use of sleeping medication（Question 6）	Daytime dysfunction（Question 7、Question 8）	1.Taking time away from sleep for recreation(No=0,Yes=1)	2.Accustomed to staying up late(No=0,Yes=1)	3.Staying up late to work or study(No=0,Yes=1)
1	1	Hebei	2	4	1	20	175	69	22.5306	1	1	1		1			2	1	23:30:00	2	6:00	6.5	2	1	0	0	1	2	0	0	0	0	2	0	0	0	0	No	7	1	2	2	0	1	0	1	1	1	0
2	2	Shandong	2	5	2	21	163	56	21.0772	1	1	1		1			2	1	23:30:00	1	7:30	7.5	4	1	0	0	1	0	0	0	0	0	1	0	0	0	0	No	4	1	1	0	0	1	0	1	1	0	0
2	3	Shandong	2	2	2	21	170	66	22.8374	1	1	1		2	1	1	1	1	23:15:00	0	08:30:00	8.5	5	0	0	2	1	0	0	0	0	0	0	0	0	0	0	No	2	0	0	0	0	0	0	2	0	0	1
2	4	Shandong	2	3	2	21	173	58	19.3792	1	1	1		1			2	1	22:30:00	0	06:30:00	7.5	4	2	0	3	3	0	3	2	0	0	2	0	0	0	2	stressed out state	6	2	0	0	0	1	0	3	1	0	0
2	5	Shandong	2	1	2	21	168	61	21.6128	1	1	1		1			4	1	23:00:00	1	07:00:00	7.5	4	0	0	0	0	0	0	2	0	0	0	0	0	0	0	No	2	0	1	0	0	1	0	0	1	0	0
1	6	Shandong	1	2	2	18	173	55	18.3768	1	1	1		2	1	1	4	1	00:00:00	0	9:30	6.5	3	2	0	3	1	1	0	0	0	1	2	1	0	1	0	No	9	2	1	1	2	1	0	2	0	1	0
1	7	Shandong	1	1	1	21	170	60	20.7612	1	1	1		1			2	1	23:00:00	0	06:30:00	5.5	2	0	0	0	0	0	0	1	0	0	0	0	0	0	0	No	5	0	0	2	2	1	0	0	1	1	0
1	8	Hebei	3	5	1	25	180	80	24.6914	1	1	1		2	2	1	3	1	02:00:00	1	08:00:00	4.5	1	2	0	1	3	1	0	0	0	0	3	0	0	0	0	No	10	2	1	3	1	1	0	2	1	0	0
2	9	Fujian	2	2	2	21	163	52	19.5717	1	1	1		1			1	1	00:00:00	1	08:00:00	7.5	4	2	0	3	1	3	2	2	0	0	2	2	0	0	2	No	8	2	2	0	0	2	0	2	1	1	0
1	10	Neimenggu	2	1	2	21	158	57.5	23.0332	1	1	1		1			1	1	1:30	1	08:00:00	6.5	3	2	0	3	3	2	0	0	3	0	3	0	0	3	0	No	9	2	2	1	0	1	0	3	1	0	0
1	11	Shandong	1	3	2	18	165	63	23.1405	1	1	1		1			3	1	23:30:00	3	06:45:00	5.5	2	1	0	2	2	3	1	1	0	2	0	1	0	0	0	No	10	1	3	2	1	1	0	2	1	0	0
1	12	Tianjin	3	2	2	26	152	52	22.5069	1	1	1		1			3	3	00:00:00	2	7:30	5.5	2	1	0	1	1	2	1	0	0	0	1	0	1	0	0	No	9	1	2	2	2	1	0	1	1	1	0
1	13	Shandong	3	1	2	23	158	52	20.83	1	1	1		1			1	1	23:00:00	1	06:40:00	6.5	3	1	0	2	1	1	2	1	0	1	3	0	2	0	1	repeated thoughts in bed	7	1	1	1	0	2	0	2	1	0	0
2	14	Shandong	3	4	1	24	181	60	18.3145	1	1	1		1			3	3	00:00:00	0	08:00:00	7.5	4	0	0	0	0	0	0	0	0	0	0	0	0	0	0	No	0	0	0	0	0	0	0	0	1	0	0
1	15	Shandong	3	2	2	28	165	53	19.4674	1	1	1		1			1	3	00:00:00	0	07:00:00	5.5	2	1	0	2	2	0	0	1	0	0	0	0	1	0	0	No	7	1	0	2	1	1	0	2	1	0	1
2	16	Shandong	3	1	2	25	154	53	22.3478	1	1	1		1			2	1	23:00:00	1	07:00:00	7.5	4	1	0	2	1	1	1	0	0	0	1	1	0	0	0	No	5	1	1	0	0	1	0	2	1	0	0
1	17	Tianjin	3	2	2	25	174	90	29.7265	1	1	1		1			4	3	23:00:00	3	08:00:00	4.5	1	3	2	3	3	3	3	0	2	0	3	0	3	3	3	the dormitory environment affects sleep	19	3	3	3	3	2	2	3	0	0	0
2	18	Shandong	3	1	2	24	162	57	21.7193	1	1	1		2	1	1	3	3	00:30:00	0	08:00:00	7.5	4	1	0	2	2	0	0	0	0	0	2	0	0	0	0	No	4	1	0	0	0	1	0	2	1	0	0
2	19	Fujian	2	2	1	20	183	61	18.2149	1	1	1		1			3	3	23:00:00	0	07:45:00	7.5	4	1	0	2	2	1	0	0	0	0	0	1	0	0	0	No	5	1	1	0	0	1	0	2	1	0	1
2	20	Tianjin	3	1	2	23	165	56	20.5693	2	1	1		2	2	2	2	1	1:30	0	11:00	9.5	6	1	1	2	1	1	2	0	0	0	2	0	0	1	0	No	6	1	1	0	0	1	1	2	1	0	0
1	21	Shandong	2	5	1	21	185	62	18.1154	1	1	1		2	2	1	2	1	22:30:00	0	5:30	6.5	3	1	0	2	1	1	0	0	0	0	0	0	0	0	0	No	5	1	1	1	0	0	0	2	1	0	0
1	22	Tianjin	3	3	2	25	160	54	21.0938	1	1	1		1			1	1	2:00	2	9:30	5.5	2	2	2	3	3	3	3	1	0	1	2	0	2	1	0	No	16	2	3	2	2	2	2	3	0	1	0
1	23	Tianjin	2	1	2	24	166	50	18.1449	1	1	1		1			2	3	00:00:00	0	6:50	6.5	3	0	0	1	2	0	0	0	0	0	0	0	0	0	0	No	3	0	0	1	0	0	0	2	0	0	1
1	24	Shandong	2	4	2	20	170	56	19.3772	1	1	1		2	1	1	1	1	03:00:00	1	11:00	6.5	3	1	0	0	1	2	0	0	0	0	0	0	1	0	0	No	7	1	2	1	1	1	0	1	1	1	0
2	25	Jilin	2	1	2	23	162	56	21.3382	7	1	1		1			4	3	23:00:00	0	07:00:00	7.5	4	0	0	0	0	0	0	0	0	0	1	0	0	0	0	No	1	0	0	0	0	1	0	0	0	1	0
1	26	Henan	1	2	2	20	166	51	18.5078	1	1	1		1			3	3	23:30:00	0	8:20	6.5	3	0	0	0	0	0	0	1	0	0	0	0	0	0	0	No	4	0	0	1	2	1	0	0	0	0	1
1	27	Jiangsu	2	2	2	22	163	50	18.8189	1	1	1		1			3	3	00:00:00	2	7:30	6.5	3	1	0	2	0	0	0	0	0	0	0	1	0	0	0	No	5	1	1	1	0	1	0	1	1	0	0
2	28	Shandong	3	1	1	24	168	60	21.2585	1	1	1		2	2	1	4	2	22:30:00	1	7:30	7.5	4	0	0	0	0	0	0	1	0	0	0	0	0	0	0	No	3	0	1	0	1	1	0	0	0	0	0
1	29	Shandong	3	1	2	24	162	55	20.9572	1	1	1		1			4	3	23:00:00	3	11:00	6.5	3	2	0	3	3	3	2	1	0	0	2	2	2	1	2	mood problems	14	2	3	1	3	2	0	3	1	1	0
1	30	Shandong	3	5	2	24	164	56	20.8209	1	1	1		1			3	1	23:00:00	1	7:30	6.5	3	1	0	2	1	1	2	1	0	0	2	1	1	2	2	the dormitory environment affects sleep	8	1	1	1	1	2	0	2	1	0	1
2	31	Europe	3	1	2	24	170	54	18.6851	1	1	1		1			3	2	23:30:00	2	9:00	7.5	4	2	0	2	2	3	3	0	0	0	0	0	0	0	3	staying up late to work or study	9	2	3	0	1	1	0	2	0	1	0
2	32	Shandong	3	3	1	25	178	75	23.6713	1	1	1		1			4	1	00:40:00	1	09:30:00	8.5	5	0	0	2	1	0	0	0	0	0	3	0	0	0	0	No	4	0	1	0	0	1	0	2	0	0	0
1	33	Shandong	3	1	1	22	175	67	21.8776	1	1	1		1			4	1	00:30:00	0	07:00:00	4.5	1	2	0	3	3	3	3	3	1	0	2	2	3	2	0	No	14	2	2	3	2	2	0	3	0	0	1
1	34	Shandong	2	1	1	23	173	66	22.0522	1	1	1		1			4	1	23:50:00	0	07:15:00	6.5	3	1	0	3	2	0	0	0	0	0	0	0	0	0	0	No	5	1	0	1	0	0	0	3	0	1	0
2	35	Shandong	3	2	2	24	168	98	34.7222	1	1	1		1			2	3	01:20:00	3	10:30:00	8.5	5	2	0	3	3	3	0	0	2	2	0	0	0	0	0	No	9	2	3	0	0	1	0	3	1	1	1
2	36	Shandong	2	1	2	21	168	51	18.0697	1	1	1		1			2	1	23:00:00	0	07:00:00	7.5	4	1	0	1	0	0	0	0	0	0	0	0	0	0	0	No	2	1	0	0	0	0	0	1	1	0	0
2	37	Shandong	2	1	1	21	179	76.2	23.782	1	1	1		2	1	2	1	2	01:00:00	0	07:00:00	7.5	4	1	0	0	0	1	0	3	0	3	2	0	0	0	0	No	3	1	1	0	0	1	0	0	1	1	0
1	38	Hunan	2	3	2	18	160	57	22.2656	1	1	1		1			3	1	22:00	1	6:00	6.5	3	2	0	3	2	1	2	0	0	0	0	1	1	1	0	No	9	2	1	1	1	1	0	3	1	1	1
1	39	Macau	2	4	2	20	160	51	19.9219	1	1	1		1			3	1	23:30:00	0	06:35:00	6.5	3	1	0	1	1	2	2	2	1	1	1	1	0	0	1	the dormitory environment affects sleep	5	1	1	1	0	1	0	1	1	1	0
2	40	Shandong	2	1	2	20	167	52	18.6453	1	1	1		1			3	2	23:00:00	2	08:00:00	8.5	5	1	0	0	1	0	0	0	0	0	1	0	0	0	0	No	4	1	1	0	0	1	0	1	1	0	1
2	41	Shandong	2	1	2	20	163	44	16.5607	1	1	1		1			3	3	22:00	0	08:00:00	8.5	5	1	0	1	0	2	3	1	0	0	0	0	1	0	0	No	4	1	1	0	0	1	0	1	1	0	0
1	42	Shandong	2	2	2	20	165	65	23.8751	1	1	1		1			4	2	23:30:00	0	07:00:00	6.5	3	0	0	1	1	0	0	0	0	0	0	0	0	0	0	No	2	0	0	1	0	0	0	1	1	1	0
2	43	Shandong	2	1	2	22	169	50	17.5064	1	1	1		1			1	1	23:00:00	1	7:30	8.5	5	1	0	0	0	1	0	2	0	0	1	0	0	0	0	No	3	1	1	0	0	1	0	0	1	0	0
1	44	Shandong	2	2	1	21	178	72	22.7244	1	1	1		1			1	3	23:00:00	0	6:00	6.5	3	0	0	1	1	0	0	0	0	1	0	0	0	0	0	No	3	0	0	1	0	1	0	1	1	0	0
1	45	Shandong	2	2	2	21	169	53	18.5568	1	1	1		1			1	1	23:30:00	0	07:00:00	6.5	3	0	0	0	1	0	0	0	0	0	2	0	0	0	0	No	3	0	0	1	0	1	0	1	1	1	0
1	46	Shandong	2	1	2	20	168	56	19.8413	1	1	1		1			1	1	22:35	0	07:15:00	6.5	3	1	0	1	1	1	1	1	1	1	1	1	1	1	0	No	6	1	1	1	1	1	0	1	1	0	0
2	47	Shandong	2	1	1	20	180	65	20.0617	1	1	1		1			1	3	22:30:00	1	07:00:00	7.5	4	1	0	0	0	0	0	1	0	0	0	0	0	0	0	No	3	1	1	0	0	1	0	0	1	0	0
1	48	Shandong	2	4	1	21	173	64	21.3839	1	1	1		2	2	1	3	1	23:00:00	1	6:00	6.5	3	1	0	3	1	0	2	0	0	0	1	0	0	0	0	No	6	1	1	1	0	1	0	2	0	1	1
2	49	Shandong	2	2	2	20	165	60	22.0386	1	1	1		1			2	2	22:30:00	0	06:30:00	7.5	4	0	0	1	1	0	1	1	0	0	0	0	2	0	0	No	2	0	0	0	0	1	0	1	0	0	1
1	50	Shandong	2	1	2	21	175	70	22.8571	1	1	1		1			3	1	23:00:00	1	08:00:00	6.5	3	1	0	1	0	1	0	1	0	0	1	0	0	0	0	No	7	1	1	1	2	1	0	1	0	1	0
2	51	Gansu	2	1	2	21	168	53	18.7783	1	1	1		1			2	2	22:30:00	0	07:10:00	7.5	4	0	0	2	0	0	0	0	0	0	0	0	0	0	0	No	1	0	0	0	0	0	0	1	0	0	1
2	52	Shandong	2	3	2	20	167	45	16.1354	1	1	1		1			1	1	23:30:00	0	08:00:00	7.5	4	1	0	3	0	1	0	0	0	2	1	1	2	0	0	No	5	1	1	0	0	1	0	2	1	1	0
1	53	Shandong	2	1	2	20	163	59	22.2063	1	1	1		2	2	1	2	2	22:30:00	1	6:50	6.5	3	2	0	3	2	2	3	0	1	0	1	1	2	0	0	No	10	2	2	1	1	1	0	3	1	1	1
2	54	Shandong	2	2	1	20	183	53	15.8261	1	1	1		1			3	2	23:00:00	0	08:00:00	7.5	4	1	0	1	1	1	0	0	0	0	0	0	3	0	0	No	5	1	1	0	1	1	0	1	0	1	0
1	55	Shandong	3	1	2	25	165	55	20.202	1	1	1		1			1	3	00:00:00	0	07:00:00	6.5	3	1	0	2	1	0	0	0	1	0	0	0	0	0	0	No	5	1	0	1	0	1	0	2	0	1	0
2	56	Shanghai	3	2	1	24	170	58	20.0692	1	1	1		2	2	1	2	1	00:00:00	0	08:30:00	7.5	4	1	0	2	0	0	0	0	0	0	2	0	0	0	0	No	3	1	0	0	0	1	0	1	0	0	0
1	57	Shandong	3	1	1	24	177	50	15.9597	3	1	1		2	1	2	1	1	23:00:00	1	05:00:00	6.5	3	1	0	3	3	1	3	0	1	0	1	0	1	0	0	No	7	1	1	1	0	1	0	3	1	0	1
2	58	Shandong	3	1	2	25	160	44	17.1875	1	1	1		1			1	1	00:00:00	0	08:00:00	7.5	4	0	0	3	1	0	0	0	0	0	0	0	0	0	0	No	2	0	0	0	0	0	0	2	1	1	0
1	59	Shandong	3	2	2	31	173	50	16.7062	1	1	1		1			3	1	23:30:00	0	07:00:00	6.5	3	0	0	1	1	0	0	0	0	0	0	0	0	0	0	No	2	0	0	1	0	0	0	1	0	0	1
1	60	Shandong	3	1	2	26	153	45	19.2234	1	1	1		1			1	3	23:30:00	0	07:15:00	6.5	3	1	0	3	3	0	0	0	0	0	0	0	2	0	0	No	7	1	0	1	1	1	0	3	1	0	0
1	61	Shandong	3	2	1	23	173	67	22.3863	1	1	1		1			4	2	00:00:00	0	06:30:00	6.5	3	0	0	0	0	0	0	0	0	0	0	0	0	0	0	No	1	0	0	1	0	0	0	0	0	0	0
1	62	Anhui	2	1	1	20	163	82	30.863	1	1	1		1			1	2	00:00:00	1	6:50	6.5	3	2	0	2	1	1	0	0	0	0	0	1	0	1	0	No	7	2	1	1	0	1	0	2	0	0	1
1	63	Anhui	2	1	1	19	184	66	19.4943	1	1	2	5	2	1	1	4	3	2:30	2	08:00:00	6.5	3	2	0	2	0	3	1	0	0	0	0	0	1	0	0	No	8	2	3	1	0	1	0	1	0	0	0
1	64	Anhui	2	4	1	21	175	78	25.4694	1	1	1		1			2	1	23:30:00	0	7:40	6.5	3	1	0	0	0	0	0	0	0	0	0	0	0	0	0	No	3	1	0	1	1	0	0	0	1	0	1
1	65	Shandong	3	1	1	25	180	82.5	25.463	1	1	1		2	2	2	2	1	00:00:00	2	08:00:00	6.5	3	1	0	2	2	0	0	1	0	0	1	0	0	0	0	No	7	1	1	1	1	1	0	2	1	1	0
1	66	Shandong	3	1	2	24	158	52	20.83	1	1	1		1			2	1	00:00:00	2	07:00:00	4.5	1	2	0	3	2	2	0	0	0	0	0	0	2	0	0	No	14	2	2	3	3	1	0	3	1	1	1
1	67	Shandong	3	1	2	24	168	62	21.9671	1	1	1		1			1	1	23:30:00	1	06:30:00	6.5	3	2	0	0	1	2	3	2	0	0	0	2	3	0	0	No	8	2	2	1	0	2	0	1	1	0	0
1	68	Shandong	2	4	2	19	172	60	20.2812	1	1	1		1			2	2	00:30:00	1	07:00:00	6.5	3	1	0	3	2	1	0	0	0	0	1	0	0	0	0	No	7	1	1	1	0	1	0	3	1	1	0
2	69	Shandong	2	1	1	25	193	86	23.0879	1	1	1		2	1	1	4	1	23:00:00	0	07:00:00	7.5	4	1	0	3	2	2	2	2	0	1	0	0	1	0	0	No	6	1	1	0	0	1	0	3	1	1	0
1	70	Shandong	3	3	1	24	182	78	23.5479	1	1	1		2	1	2	2	3	23:00:00	1	7:40	6.5	3	2	0	3	3	3	3	3	0	3	3	0	0	0	0	No	11	2	2	1	1	2	0	3	0	0	0
1	71	Fujian	3	1	1	25	179	72	22.4712	1	1	2	1	1			3	1	01:00:00	1	08:00:00	6.5	3	2	0	3	2	1	0	0	0	0	1	0	0	0	0	No	8	2	1	1	0	1	0	3	0	0	1
2	72	Shandong	3	1	2	22	164	55	20.4491	1	1	1		1			2	1	23:00:00	0	07:00:00	7.5	4	0	0	2	1	0	0	0	0	0	1	0	0	0	0	No	3	0	0	0	0	1	0	2	1	0	0
1	73	Hubei	1	3	2	23	160	52	20.3125	1	1	1		2	1	1	3	3	23:30:00	2	7:30	6.5	3	3	0	3	3	2	3	0	3	0	0	0	1	0	0	No	11	3	2	1	1	1	0	3	1	0	0
1	74	Shandong	2	1	1	25	186	67	19.3664	1	1	1		1			2	1	01:00:00	1	9:00	6.5	3	2	0	3	0	2	0	0	0	1	0	0	0	3	2	staying up late to work or study	9	2	2	1	1	1	0	2	1	0	0
1	75	Shandong	3	1	2	24	165	55	20.202	1	1	1		2	2	1	1	1	23:55	0	6:50	5.5	2	0	0	0	0	0	0	0	0	0	0	0	0	0	0	No	3	0	0	2	1	0	0	0	1	1	1
1	76	Henan	3	1	2	23	160	55	21.4844	1	1	1		1			2	1	23:36	3	7:25	6.5	3	1	0	2	2	0	0	0	0	0	0	0	0	0	0	No	7	1	2	1	1	0	0	2	1	1	1
1	77	Shandong	3	1	2	26	158	46.5	18.6268	1	1	1		1			3	3	23:30:00	3	08:10:00	5.5	2	2	0	1	1	1	1	0	0	0	0	0	0	0	0	No	11	2	2	2	3	1	0	1	1	0	0
2	78	Shandong	3	3	2	26	163	60	22.5827	1	1	1		1			3	1	23:00:00	0	08:00:00	8.5	5	0	0	0	0	0	0	0	0	0	0	0	0	0	0	No	0	0	0	0	0	0	0	0	1	0	0
2	79	Shandong	3	4	2	27	167	49.8	17.8565	1	2	1		1			3	1	23:00:00	1	07:00:00	7.5	4	1	0	0	0	0	0	0	0	0	0	0	1	0	0	No	3	1	1	0	0	1	0	0	0	0	0
2	80	Shandong	3	1	2	24	167	57	20.4382	1	1	1		1			3	3	00:30:00	1	08:00:00	8.5	5	2	0	2	2	2	2	0	0	0	0	0	1	0	1	staying up late to work or study	7	2	2	0	0	1	0	2	0	1	1
1	81	Shandong	2	2	1	24	181	74	22.5878	1	2	1		2	1	1	2	1	23:00:00	1	07:00:00	6.5	3	2	0	3	1	2	1	1	0	0	2	0	1	0	0	No	9	2	2	1	1	1	0	2	1	0	0
1	82	Shandong	3	1	1	27	173	65	21.7181	1	1	1		2	1	1	2	3	23:00:00	0	06:30:00	6.5	3	1	0	1	1	0	1	0	0	0	0	0	0	0	0	No	4	1	0	1	0	1	0	1	0	0	1
2	83	Hebei	3	1	1	23	178	61.5	19.4104	1	1	1		2	2	2	1	3	23:30:00	1	9:00	7.5	4	1	0	0	1	1	0	0	0	3	1	1	0	0	0	No	5	1	1	0	1	1	0	1	1	1	0
1	84	Liaoning	3	5	2	24	162	52	19.8141	1	1	1		1			2	3	23:00:00	0	07:00:00	6.5	3	1	0	2	1	0	0	0	0	0	0	0	0	0	0	No	5	1	0	1	1	0	0	2	1	0	1
2	85	Heilongjiang	3	1	2	25	165	47	17.2635	3	1	1		1			2	3	23:30:00	0	06:30:00	7.5	4	0	0	0	0	0	0	0	0	0	0	0	0	0	0	No	0	0	0	0	0	0	0	0	0	1	0
1	86	Hebei	3	1	1	27	171	58	19.8352	1	1	1		2	1	1	2	3	23:40	1	07:00:00	5.5	2	2	0	0	1	2	1	1	0	0	1	0	0	0	0	No	9	2	2	2	1	1	0	1	1	1	1
1	87	Hebei	3	4	2	26	165	58	21.3039	1	1	1		1			3	1	00:30:00	2	06:30:00	6.5	3	2	0	3	3	2	1	0	1	0	1	1	1	0	0	No	9	2	2	1	0	1	0	3	1	1	0
2	88	Tianjin	1	1	2	20	162	47	17.9089	1	1	1		1			2	3	23:00:00	1	08:00:00	7.5	4	0	0	0	0	0	0	0	0	0	0	0	0	0	0	No	2	0	1	0	1	0	0	0	1	0	0
2	89	Shandong	1	1	2	18	168	60	21.2585	1	1	1		1			3	3	22:30:00	0	06:40:00	9.5	6	0	0	1	1	2	1	1	0	0	0	0	0	0	1	No	3	0	1	0	0	1	0	1	1	0	1
1	90	Shandong	1	4	2	18	160	50	19.5312	1	1	1		1			2	3	23:30:00	0	07:10:00	5.5	2	0	0	2	1	1	0	0	0	0	0	0	0	0	0	No	7	0	1	2	2	0	0	2	0	1	0
1	91	Shandong	1	1	2	19	164	46	17.1029	1	1	1		1			2	3	22:30:00	1	7:30	5.5	2	0	0	1	1	0	0	1	1	0	2	0	2	1	0	No	8	0	1	2	3	1	0	1	1	0	0
2	92	Shandong	1	1	2	19	163	51.5	19.3835	1	1	1		1			2	1	23:00:00	0	10:00:00	10	6	1	0	1	1	0	1	0	0	0	0	0	1	0	0	No	3	1	0	0	0	1	0	1	1	1	0
1	93	Shandong	1	1	2	19	160	67	26.1719	1	1	1		1			3	3	21:00:00	1	05:40:00	6.5	3	1	0	1	0	0	0	0	0	0	0	0	1	0	0	No	6	1	1	1	1	1	0	1	1	0	0
2	94	Shandong	1	1	2	19	168	52.5	18.6012	1	1	1		2	2	1	1	3	22:30:00	3	08:00:00	7.5	4	1	0	0	1	0	0	0	0	0	0	0	0	0	0	No	5	1	2	0	1	0	0	1	1	0	0
2	95	Shandong	1	1	2	20	173	60	20.0474	1	1	1		1			1	1	23:00:00	0	7:30	7.5	4	1	0	2	0	1	1	1	0	0	0	0	0	0	0	No	4	1	1	0	0	1	0	1	1	0	0
1	96	Shandong	1	2	2	19	165	48	17.6309	1	1	1		1			1	3	21:00:00	0	06:55:00	6.5	3	1	0	2	1	0	0	0	0	0	0	0	0	0	2	the dormitory environment affects sleep	7	1	0	1	2	1	0	2	0	0	0
2	97	Shandong	1	1	2	20	163	62	23.3355	1	1	1		1			2	3	22:00	0	5:30	7.5	4	1	0	1	0	0	0	0	0	0	0	0	0	0	0	No	2	1	0	0	0	0	0	1	1	0	0
2	98	Shandong	1	1	2	19	156	42	17.2584	1	1	1		1			2	3	22:30:00	0	7:30	7.5	4	0	0	0	0	0	0	0	0	0	0	0	0	0	0	No	1	0	0	0	1	0	0	0	0	0	0
1	99	Shandong	1	1	2	20	170	70	24.2215	1	1	1		1			3	1	23:00:00	3	08:00:00	6.5	3	1	0	2	1	2	3	0	0	0	2	0	2	0	0	No	10	1	3	1	2	1	0	2	1	0	0
2	100	Shandong	1	5	2	19	161	55.5	21.4112	1	1	1		1			2	1	23:00:00	0	07:15:00	7.5	4	0	0	0	0	0	0	0	0	0	0	0	0	0	0	No	0	0	0	0	0	0	0	0	1	1	0
1	101	Shandong	1	1	2	19	168	54	19.1327	1	1	1		1			3	1	22:30:00	1	08:00:00	6.5	3	1	0	0	1	1	0	0	0	0	0	0	0	0	0	No	6	1	1	1	2	0	0	1	1	1	0
2	102	Shandong	1	3	2	19	170	55	19.0311	1	1	1		1			2	3	23:00:00	0	7:38	8.5	5	1	0	0	1	1	1	0	0	0	0	0	0	0	0	No	4	1	1	0	0	1	0	1	1	0	0
2	103	Shandong	1	1	2	20	163	54	20.3244	1	1	1		2	1	1	2	3	22:00	0	7:30	7.5	4	1	0	1	1	0	1	1	0	0	0	0	0	0	0	No	4	1	0	0	1	1	0	1	1	0	1
1	104	Shandong	1	1	2	19	158	94	37.6542	1	1	1		1			1	2	23:30:00	0	7:20	4.5	1	0	0	2	0	0	0	1	0	0	0	1	0	0	0	No	8	0	0	3	3	1	0	1	1	0	0
2	105	Shandong	1	3	2	19	165	80	29.3848	1	1	1		1			1	3	22:30:00	3	08:00:00	9.5	6	0	0	0	0	2	0	0	0	0	2	0	0	0	0	No	4	0	3	0	0	1	0	0	1	0	0
1	106	Shandong	1	1	2	19	160	70	27.3438	1	1	1		1			3	3	23:00:00	0	07:00:00	6.5	3	0	0	3	1	0	1	0	0	0	0	0	1	0	0	No	5	0	0	1	1	1	0	2	0	0	1
2	107	Shandong	1	1	2	18	160	47	18.3594	1	1	1		1			1	1	23:00:00	0	10:30:00	9.5	6	0	0	0	0	0	0	0	0	0	0	0	0	0	0	No	1	0	0	0	1	0	0	0	0	1	0
2	108	Shandong	1	1	2	19	165	57.5	21.1203	1	1	1		1			2	3	23:00:00	1	08:30:00	8.5	5	1	0	1	1	0	2	0	2	0	1	0	2	0	0	No	4	1	1	0	0	1	0	1	1	0	0
1	109	Shandong	1	1	2	19	163	62	23.3355	1	1	1		1			1	3	23:00:00	0	06:30:00	6.5	3	0	0	0	0	0	0	0	0	0	0	0	0	0	0	No	1	0	0	1	0	0	0	0	1	0	0
1	110	Shandong	1	1	2	19	158	50	20.0288	1	1	1		1			1	3	23:00:00	1	08:00:00	6.5	3	1	0	1	0	2	0	0	0	0	0	0	0	0	0	No	7	1	2	1	2	0	0	1	1	0	0
1	111	Shandong	1	2	2	19	158	53	21.2306	1	1	1		1			2	2	22:30:00	0	7:30	6.5	3	0	0	1	1	0	0	0	0	0	0	0	1	0	0	No	5	0	0	1	2	1	0	1	1	0	0
2	112	Shandong	1	1	2	20	160	57.5	22.4609	1	1	1		1			3	3	23:30:00	0	08:30:00	7.5	4	2	0	0	1	0	0	0	0	0	0	0	0	0	0	No	4	2	0	0	1	0	0	1	0	0	0
2	113	Shandong	1	1	2	19	168	52	18.424	1	1	1		1			1	3	22:00	1	07:00:00	7.5	4	0	0	1	1	2	1	1	0	0	0	0	0	0	0	No	5	0	2	0	1	1	0	1	1	0	1
2	114	Shandong	1	1	1	19	180	67	20.679	1	1	2	5	2	1	3	2	3	22:00	0	07:00:00	8.5	5	1	0	1	1	1	1	1	1	3	1	1	0	1	0	No	4	1	1	0	0	1	0	1	0	0	0
1	115	Shandong	1	1	2	19	167	63	22.5896	1	1	1		2	2	1	1	2	23:00:00	0	7:30	6.5	3	1	0	1	1	0	2	1	1	0	1	0	1	0	0	No	5	1	0	1	1	1	0	1	1	0	1
2	116	Shandong	1	1	2	19	160	50	19.5312	1	1	1		1			2	3	22:00	0	06:30:00	7.5	4	0	0	0	0	0	0	0	0	0	0	0	0	0	0	No	0	0	0	0	0	0	0	0	0	0	0
2	117	Shandong	1	5	2	19	166	61	22.1367	1	1	1		1			1	3	23:00:00	1	08:00:00	7.5	4	1	0	0	0	0	0	0	0	0	0	0	0	0	0	No	3	1	1	0	1	0	0	0	1	0	0
2	118	Shandong	1	1	2	19	160	45	17.5781	1	1	1		1			2	3	23:00:00	0	08:30:00	7.5	4	0	0	1	1	0	0	0	0	0	1	1	0	0	0	No	3	0	0	0	1	1	0	1	1	0	0
1	119	Shandong	1	1	2	19	163	50	18.8189	1	1	1		1			2	1	23:00:00	0	7:30	6.5	3	0	0	0	0	0	0	0	0	0	0	0	0	0	0	No	2	0	0	1	1	0	0	0	0	0	0
2	120	Shandong	1	1	2	19	160	55	21.4844	1	1	1		1			2	2	23:00:00	0	9:00	7.5	4	0	0	0	0	0	0	0	0	0	0	0	0	0	0	No	1	0	0	0	1	0	0	0	0	0	0
2	121	Shandong	1	1	2	19	164	48	17.8465	1	1	1		1			2	3	23:00:00	0	07:00:00	8.5	5	1	0	0	1	1	0	1	0	0	0	0	0	0	0	No	4	1	1	0	0	1	0	1	1	0	0
2	122	Shandong	1	1	2	18	163	62	23.3355	1	1	1		1			1	1	22:30:00	0	07:00:00	8.5	5	1	2	0	1	0	0	0	0	0	2	0	2	0	0	No	5	1	0	0	0	1	2	1	1	0	1
1	123	Shandong	2	3	2	19	170	70	24.2215	1	1	1		1			1	3	01:00:00	3	07:00:00	5.5	2	1	0	0	0	0	0	0	0	0	0	0	0	0	0	No	5	1	2	2	0	0	0	0	1	1	0
1	124	Shandong	1	1	2	18	161	54	20.8325	1	1	1		1			1	3	23:00:00	0	08:00:00	6.5	3	1	0	1	1	0	0	0	1	1	1	0	0	0	0	No	6	1	0	1	2	1	0	1	0	1	1
2	125	Shandong	1	4	2	20	170	62.5	21.6263	1	1	1		2	1	1	2	3	23:30:00	1	9:00	7.5	4	1	0	0	0	0	0	1	0	0	2	2	0	0	0	No	4	1	1	0	1	1	0	0	1	0	0
2	126	Shandong	1	1	2	19	165	50	18.3655	1	1	1		1			3	3	23:00:00	0	08:00:00	7.5	4	0	0	0	0	0	0	0	0	0	0	0	0	0	0	No	1	0	0	0	1	0	0	0	1	0	1
1	127	Shandong	1	1	1	20	178	57	17.9902	1	1	2	3	2	1	1	2	3	22:30:00	0	7:30	4.5	1	1	0	0	0	0	1	1	0	0	0	0	0	0	0	No	8	1	0	3	3	1	0	0	1	0	0
1	128	Shandong	1	1	2	18	160	59	23.0469	1	1	2	3	2	1	1	2	1	23:00:00	0	08:00:00	6.5	3	1	0	0	1	2	0	0	0	0	0	0	0	0	0	No	6	1	1	1	2	0	0	1	1	1	0
1	129	Shandong	3	2	2	30	163	55	20.7008	1	1	1		1			1	1	00:00:00	2	7:20	5.5	2	2	0	3	3	3	3	2	1	0	0	0	2	0	0	No	12	2	3	2	1	1	0	3	1	1	1
1	130	Shandong	3	1	2	22	168	45	15.9439	1	1	1		1			1	3	00:00:00	2	7:20	5.5	2	1	0	3	3	1	2	1	0	0	3	0	2	0	0	No	10	1	2	2	1	1	0	3	1	1	1
1	131	Shandong	3	1	1	24	181	66	20.1459	1	1	1		2	2	5	1	3	00:30:00	0	07:10:00	6.5	3	1	0	2	1	0	2	0	0	0	0	0	0	0	1	the dormitory environment affects sleep	5	1	0	1	0	1	0	2	1	1	0
2	132	Shandong	2	1	2	24	166	55	19.9594	1	1	1		1			1	2	23:00:00	0	07:00:00	7.5	4	0	0	1	1	0	0	0	0	0	0	1	0	1	0	No	2	0	0	0	0	1	0	1	1	0	1
2	133	Shandong	3	1	1	28	175	74	24.1633	3	2	1		2	3	1	1	3	23:35:00	0	06:35:00	7.5	4	0	0	1	2	0	2	0	0	0	0	0	0	0	0	No	3	0	0	0	0	1	0	2	1	0	0
1	134	Shandong	3	1	1	23	175	70	22.8571	1	1	1		1			2	2	23:00:00	0	07:00:00	3.5	1	0	0	1	1	0	2	1	2	0	0	1	1	1	0	No	8	0	0	3	3	1	0	1	1	0	1
1	135	Shandong	3	1	1	35	172	55	18.5911	1	2	1		1			3	3	00:00:00	0	08:30:00	6.5	3	1	0	1	1	0	1	1	0	0	0	0	1	0	0	No	5	1	0	1	1	1	0	1	0	0	1
1	136	Beijing	2	1	1	21	175	65	21.2245	1	1	1		1			2	2	23:30:00	1	7:20	6.5	3	1	0	3	2	2	2	1	0	0	0	0	0	0	2	the dormitory environment affects sleep	9	1	2	1	1	1	0	3	0	0	0
2	137	Shandong	2	1	2	21	173	63	21.0498	1	1	1		1			3	3	22:30:00	1	7:30	7.5	4	0	0	0	0	0	0	0	0	0	0	0	0	0	0	No	2	0	1	0	1	0	0	0	0	0	1
1	138	Beijing	2	1	2	21	163	70	26.3465	1	1	1		1			1	3	23:30:00	0	07:10:00	6.5	3	1	0	2	1	1	0	0	0	0	1	1	0	0	0	No	6	1	1	1	0	1	0	2	1	1	1
2	139	Beijing	3	1	1	25	170	70.5	24.3945	1	1	1		1			1	1	00:00:00	1	07:00:00	7.5	4	0	0	1	0	1	1	1	0	0	0	0	1	0	0	No	3	0	1	0	0	1	0	1	1	1	1
1	140	Beijing	2	1	2	21	170	78	26.9896	1	1	1		1			2	3	23:00:00	2	7:25	6.5	3	2	0	1	1	2	0	1	0	0	0	0	0	0	0	No	8	2	2	1	1	1	0	1	0	1	1
1	141	Beijing	2	1	2	19	169	58	20.3074	1	1	1		1			3	3	23:00:00	0	07:00:00	5.5	2	0	0	0	1	1	0	0	0	0	0	0	0	0	0	No	6	0	1	2	2	0	0	1	1	0	1
1	142	Beijing	2	2	1	22	175	67	21.8776	1	1	1		1			2	3	23:30:00	0	7:20	6.5	3	1	0	1	1	0	0	0	0	2	0	0	0	0	0	No	5	1	0	1	1	1	0	1	1	0	0
1	143	Beijing	2	2	2	21	163	50	18.8189	7	1	1		1			1	1	00:00:00	0	6:20	5.5	2	1	0	1	1	0	0	0	0	0	0	0	0	0	0	No	4	1	0	2	0	0	0	1	1	0	1
1	144	Beijing	2	1	2	22	158	50	20.0288	7	1	1		1			1	2	23:30:00	2	07:00:00	3.5	1	2	0	3	3	2	2	0	0	0	0	2	2	0	0	No	14	2	2	3	3	1	0	3	0	0	0
2	145	Beijing	2	1	2	23	160	54	21.0938	1	1	1		1			2	3	23:00:00	0	06:45:00	7.5	4	1	0	1	1	0	3	0	0	0	2	2	1	0	0	No	3	1	0	0	0	1	0	1	1	0	0
1	146	Beijing	3	1	1	24	160	53	20.7031	1	1	1		1			1	3	00:00:00	1	6:50	5.5	2	1	0	3	1	1	0	1	0	1	0	0	0	0	0	No	8	1	1	2	1	1	0	2	1	1	0
1	147	Beijing	3	2	2	24	165	57	20.9366	1	1	1		1			2	1	23:40	1	6:50	6.5	3	1	0	2	1	1	3	1	0	0	0	0	2	0	2	mood problems	6	1	1	1	0	1	0	2	0	0	1
1	148	Beijing	2	1	1	21	176	85	27.4406	7	1	1		1			2	3	23:30:00	2	7:20	6.5	3	1	0	0	0	0	0	1	0	3	1	0	0	0	0	No	5	1	1	1	1	1	0	0	1	1	0
1	149	Beijing	2	1	2	21	168	56	19.8413	1	1	1		1			2	3	00:00:00	1	7:30	5.5	2	1	0	1	1	2	2	0	0	0	0	0	1	0	0	No	9	1	2	2	2	1	0	1	1	0	1
1	150	Beijing	2	1	2	20	163	59	22.2063	1	1	1		1			2	3	00:30:00	0	7:20	6.5	3	1	0	2	1	1	0	0	0	0	0	0	0	1	0	No	6	1	1	1	0	1	0	2	1	1	1
1	151	Jiangsu	1	1	1	18	180	75	23.1481	1	1	1		1			1	2	00:00:00	0	06:40:00	6.5	3	1	0	3	1	0	0	0	0	0	0	0	0	0	0	No	4	1	0	1	0	0	0	2	1	1	1
1	152	Jiangsu	1	3	1	17	172	55	18.5911	1	1	1		1			3	2	23:00:00	1	6:05	5.5	2	1	0	0	1	0	0	0	0	0	0	0	0	0	0	No	6	1	1	2	1	0	0	1	0	0	0
1	153	Jiangsu	1	1	1	16	172	58	19.6052	1	1	1		2	1	1	1	3	00:00:00	3	5:30	4.5	1	3	0	3	3	3	3	1	3	0	3	3	3	3	0	No	16	3	3	3	1	3	0	3	1	1	1
1	154	Jiangsu	1	1	2	18	174	54	17.8359	1	1	1		1			2	1	23:30:00	0	6:25	6.5	3	1	0	2	1	0	1	1	0	0	0	0	0	0	1	Sickness	5	1	0	1	0	1	0	2	1	1	0
1	155	Jiangsu	1	1	2	17	153	70	29.903	1	1	1		1			2	3	23:30:00	1	06:30:00	5.5	2	1	0	2	1	1	1	0	0	0	0	0	0	0	0	No	8	1	1	2	1	1	0	2	1	1	0
1	156	Shandong	2	1	2	20	165	60	22.0386	1	1	1		1			3	3	23:00:00	1	6:15	5.5	2	0	0	0	0	0	0	0	0	0	0	0	0	0	0	No	4	0	1	2	1	0	0	0	1	1	0
1	157	Jiangsu	1	1	2	17	170	70	24.2215	1	1	1		1			1	1	23:30:00	1	06:30:00	5.5	2	2	0	2	2	2	2	2	0	2	1	1	1	0	0	No	10	2	2	2	1	1	0	2	1	1	0
1	158	Jiangsu	1	1	2	16	172	58	19.6052	1	1	1		1			2	3	23:00:00	0	6:20	6.5	3	0	0	2	0	0	1	0	0	0	0	0	1	0	0	No	3	0	0	1	0	1	0	1	0	1	0
1	159	Jiangsu	1	1	2	17	165	48	17.6309	1	1	1		2	2	1	1	2	23:00:00	2	06:30:00	5.5	2	1	0	3	2	0	0	0	0	0	0	0	0	0	0	No	9	1	1	2	2	0	0	3	1	1	1
1	160	Shandong	2	4	2	19	164	52	19.3337	1	1	1		1			1	1	23:00:00	0	6:00	6.5	3	0	0	3	1	0	0	0	0	0	1	0	0	1	0	No	4	0	0	1	0	1	0	2	0	0	0
1	161	Jiangsu	1	1	2	17	167	71	25.4581	1	1	1		1			2	3	23:00:00	0	6:20	6.5	3	1	0	1	1	0	0	0	0	0	0	0	0	0	0	No	3	1	0	1	0	0	0	1	1	0	1
1	162	Shandong	2	1	2	18	179	70	21.847	1	1	1		1			1	1	23:00:00	0	6:00	6.5	3	0	0	0	0	0	0	0	0	0	0	0	1	0	0	No	2	0	0	1	0	1	0	0	0	1	0
1	163	Jiangsu	1	1	2	16	160	54	21.0938	1	1	1		1			2	3	23:00:00	2	06:40:00	6.5	3	2	0	3	1	0	1	0	0	1	1	1	1	0	0	No	7	2	1	1	0	1	0	2	0	1	0
1	164	Jiangsu	1	1	1	17	182	70	21.1327	1	1	1		1			1	3	23:00:00	2	06:30:00	6.5	3	1	0	0	0	0	0	1	0	0	1	1	0	0	0	No	4	1	1	1	0	1	0	0	0	1	0
1	165	Jiangsu	1	1	2	16	162	57	21.7193	1	1	1		1			2	1	23:00:00	1	06:30:00	5.5	2	0	0	0	0	0	0	0	0	0	0	0	0	0	0	No	5	0	1	2	2	0	0	0	0	0	1
2	166	Jiangsu	1	3	2	17	170	54	18.6851	1	1	1		1			1	3	23:00:00	0	6:20	7.5	4	2	0	2	1	1	1	0	0	1	0	0	0	0	3	stressed out state	6	2	1	0	0	1	0	2	0	0	1
1	167	Jiangsu	1	1	2	17	166	46	16.6933	1	1	1		1			3	1	23:00:00	2	6:15	6.5	3	2	0	3	3	2	0	0	2	0	2	0	1	0	0	No	9	2	2	1	0	1	0	3	1	0	0
1	168	Jiangsu	1	1	1	16	168	77.5	27.4589	1	1	1		1			1	3	00:00:00	0	6:50	6.5	3	0	0	3	1	0	0	0	0	0	0	0	0	0	0	No	3	0	0	1	0	0	0	2	1	0	0
1	169	Jiangsu	1	1	2	16	177	84	26.8122	1	1	1		1			3	3	23:00:00	0	06:20:00	5.5	2	1	0	3	2	1	2	0	0	0	2	2	2	0	0	No	9	1	1	2	1	1	0	3	0	0	0
1	170	Shandong	2	4	2	20	163	48	18.0662	1	1	1		1			2	1	23:00:00	1	6:25	6.5	3	1	0	3	1	0	1	1	0	0	2	2	0	1	0	No	6	1	1	1	0	1	0	2	1	1	0
1	171	Jiangsu	1	1	2	16	160	65	25.3906	1	1	1		1			1	3	22:30:00	0	06:30:00	5.5	2	0	0	0	0	0	0	0	0	0	0	0	0	0	0	No	4	0	0	2	2	0	0	0	0	0	0
1	172	Jiangsu	1	1	2	16	160	48	18.75	1	1	1		1			1	1	23:00:00	1	7:25	5.5	2	1	0	2	1	1	0	1	0	0	0	0	0	0	0	No	9	1	1	2	2	1	0	2	1	0	0
1	173	Jiangsu	1	1	2	17	166	54	19.5965	1	1	1		1			2	3	23:30:00	0	06:30:00	5.5	2	1	0	1	1	0	0	0	0	0	0	0	0	0	0	No	5	1	0	2	1	0	0	1	0	1	1
2	174	Beijing	2	4	2	19	151	60	26.3146	1	1	1		1			2	2	23:30:00	1	07:00:00	7.5	4	1	0	2	1	1	0	0	0	3	3	0	0	0	0	No	5	1	1	0	0	1	0	2	1	1	0
2	175	Jiangsu	1	1	2	17	175	65	21.2245	1	1	1		1			2	3	23:00:00	0	06:30:00	7.5	4	1	0	2	1	0	0	0	0	0	0	0	0	0	0	No	3	1	0	0	0	0	0	2	1	1	1
1	176	Jiangsu	1	1	2	16	165	75	27.5482	1	1	1		1			2	3	23:10:00	0	6:20	6.5	3	2	0	1	0	0	1	3	0	0	0	2	1	0	0	No	5	2	0	1	0	1	0	1	1	0	1
1	177	Jiangsu	1	1	2	17	170	56	19.3772	1	1	1		1			1	3	23:30:00	1	06:30:00	6.5	3	2	0	1	1	1	0	0	1	0	2	3	0	2	0	No	6	2	1	1	0	1	0	1	0	1	1
1	178	Jiangsu	1	3	2	16	164	60	22.3081	1	1	1		1			3	3	23:30:00	2	06:30:00	5.5	2	2	0	3	2	3	3	0	1	1	2	1	0	0	0	No	12	2	3	2	1	1	0	3	0	0	0
1	179	Jiangsu	1	1	2	16	168	53	18.7783	1	1	1		1			2	3	00:00:00	1	6:25	5.5	2	2	0	3	3	1	1	0	1	0	0	1	2	1	0	No	9	2	1	2	0	1	0	3	1	1	0
2	180	Shandong	2	1	1	22	180	70	21.6049	1	1	1		1			2	3	00:00:00	0	6:50	7.5	4	1	0	3	2	1	0	2	2	0	2	2	1	0	0	No	6	1	1	0	0	1	0	3	1	1	0
2	181	Jiangsu	1	1	2	18	162	84	32.0073	1	1	1		2	1	1	2	1	23:30:00	1	06:40:00	7.5	4	2	0	3	3	1	0	0	0	0	1	1	1	1	0	No	7	2	1	0	0	1	0	3	1	1	0
2	182	Jiangsu	1	1	2	17	165	56	20.5693	1	1	1		1			2	2	23:10:00	0	6:25	7.5	4	0	0	0	1	0	0	0	0	0	0	0	0	0	0	No	1	0	0	0	0	0	0	1	0	0	0
1	183	Jiangsu	1	1	2	18	171	53	18.1252	1	1	1		1			3	3	00:00:00	3	06:40:00	5.5	2	2	0	2	1	0	0	1	0	0	1	0	2	0	0	No	10	2	2	2	1	1	0	2	1	0	0
1	184	Jiangsu	1	1	2	16	164	75	27.8852	1	1	1		1			1	1	23:30:00	0	6:20	6.5	3	2	0	3	1	2	2	1	0	1	2	2	1	0	0	No	7	2	1	1	0	1	0	2	1	0	0
1	185	Jiangsu	1	1	2	16	165	52	19.1001	1	1	1		1			3	3	23:00:00	0	6:10	6.5	3	1	0	1	1	0	1	0	0	0	0	0	0	0	0	No	4	1	0	1	0	1	0	1	0	0	0
1	186	Jiangsu	1	3	2	16	162	61	23.2434	1	1	1		1			1	3	00:00:00	0	06:30:00	6.5	3	2	0	2	0	0	0	0	0	0	1	2	0	0	0	No	5	2	0	1	0	1	0	1	1	1	1
1	187	Shandong	2	1	2	19	171	51	17.4413	1	1	1		1			1	3	23:40	1	06:35:00	6.5	3	1	0	1	1	1	1	0	0	0	0	0	0	0	0	No	5	1	1	1	0	1	0	1	1	1	0
1	188	Shandong	2	1	1	18	183	73	21.7982	1	1	1		1			1	1	23:30:00	2	6:20	5.5	2	2	0	3	1	3	0	0	0	0	0	0	0	0	0	No	10	2	3	2	1	0	0	2	1	0	0
1	189	Jiangsu	1	3	2	17	173	59	19.7133	1	1	1		1			1	3	00:00:00	0	06:40:00	5.5	2	2	0	1	1	1	0	1	0	0	1	1	2	0	0	No	8	2	1	2	1	1	0	1	1	1	0
1	190	Jiangsu	1	1	2	17	156	40	16.4366	1	1	1		1			2	3	23:00:00	0	06:40:00	6.5	3	0	0	1	1	0	0	0	1	0	0	0	1	0	0	No	3	0	0	1	0	1	0	1	1	0	0
1	191	Jiangsu	1	1	2	16	166	55	19.9594	1	1	1		1			2	3	23:30:00	0	6:20	6.5	3	0	0	2	0	0	0	0	0	0	0	0	0	0	0	No	2	0	0	1	0	0	0	1	1	1	1
1	192	Jiangsu	1	3	2	17	162	50	19.052	1	1	1		1			2	3	23:20:00	1	06:40:00	6.5	3	1	0	2	0	1	0	0	0	1	0	0	0	0	0	No	5	1	1	1	0	1	0	1	0	1	0
1	193	Jiangsu	1	1	2	17	166	80	29.0318	1	1	1		1			2	3	23:00:00	2	6:20	6.5	3	2	0	1	1	1	0	0	0	1	0	0	0	2	3	Wake up in the middle of the night	7	2	2	1	0	1	0	1	0	0	0
1	194	Jiangsu	1	1	2	16	164	58	21.5645	1	1	1		1			2	3	23:30:00	0	06:30:00	6.5	3	1	0	1	0	0	0	0	0	0	0	0	0	0	0	No	3	1	0	1	0	0	0	1	1	1	1
1	195	Jiangsu	1	1	1	18	177	75	23.9395	1	1	1		1			1	3	00:00:00	0	06:40:00	5.5	2	3	0	3	3	0	0	0	0	0	3	0	1	0	3	the dormitory environment affects sleep	10	3	0	2	1	1	0	3	0	0	0
2	196	Jiangsu	1	1	2	17	167	60	21.5139	1	1	1		1			3	3	22:00	1	6:24	8.5	5	1	0	2	1	0	3	0	0	0	0	0	0	0	0	No	5	1	1	0	0	1	0	2	1	0	0
1	197	Shandong	2	1	2	20	171	60	20.5191	1	1	1		1			1	3	23:30:00	2	06:40:00	6.5	3	1	0	2	1	1	1	0	0	0	3	0	0	0	0	No	7	1	2	1	0	1	0	2	0	0	0
1	198	Jiangsu	1	1	1	18	175	70	22.8571	1	1	1		1			2	3	23:00:00	0	6:00	5.5	2	1	0	3	3	0	0	1	0	0	0	0	0	0	0	No	8	1	0	2	1	1	0	3	0	1	1
1	199	Shandong	2	1	1	20	177	74	23.6203	1	1	1		2	1	1	2	1	23:59	0	6:10	5.5	2	2	0	3	1	0	0	0	0	0	0	0	0	0	0	No	6	2	0	2	0	0	0	2	0	1	0
1	200	Jiangsu	1	1	1	16	170	60	20.7612	1	1	1		1			1	3	23:00:00	0	06:30:00	6.5	3	0	0	1	1	1	0	0	0	0	0	0	0	0	0	No	3	0	1	1	0	0	0	1	1	0	1
1	201	Jiangsu	1	1	2	17	158	51	20.4294	1	1	1		2	1	1	2	3	23:00:00	1	06:30:00	6.5	3	1	0	3	2	2	1	1	1	1	1	1	1	0	0	No	8	1	2	1	0	1	0	3	1	1	0
1	202	Jiangsu	1	1	2	16	165	40	14.6924	1	1	1		1			1	3	22:40:00	0	6:15	5.5	2	1	0	3	1	0	2	0	0	0	0	0	1	0	0	No	8	1	0	2	2	1	0	2	0	0	0
1	203	Jiangsu	1	1	2	16	161	45	17.3604	1	1	1		1			1	1	23:00:00	0	6:15	5.5	2	1	0	3	1	1	1	0	0	0	1	0	0	0	0	No	8	1	1	2	1	1	0	2	0	1	0
1	204	Shandong	2	1	2	18	160	58	22.6562	1	1	1		1			2	1	23:00:00	0	6:00	5.5	2	0	0	3	0	0	0	0	0	2	0	0	0	0	0	No	6	0	0	2	1	1	0	2	0	0	0
1	205	Shandong	2	1	2	19	168	59	20.9042	1	1	1		1			1	3	23:30:00	0	6:20	6.5	3	0	0	2	2	0	0	0	0	0	0	0	0	1	0	No	4	0	0	1	0	1	0	2	1	0	1
1	206	Jiangsu	1	1	2	16	175	75	24.4898	1	1	1		1			2	3	23:30:00	1	06:35:00	4.5	1	2	0	2	1	1	1	0	0	1	3	1	0	0	0	No	12	2	1	3	3	1	0	2	1	1	0
1	207	Shandong	2	1	2	19	165	55	20.202	1	1	1		1			2	3	23:00:00	1	06:30:00	6.5	3	1	0	0	0	1	0	0	0	0	0	0	1	0	0	No	4	1	1	1	0	1	0	0	0	0	0
1	208	Jiangsu	1	3	2	17	163	50	18.8189	1	1	1		1			2	3	23:30:00	1	6:25	6.5	3	2	0	2	2	1	1	0	2	0	0	0	0	0	0	No	7	2	1	1	0	1	0	2	1	0	0
1	209	Jiangsu	1	1	2	17	162	60	22.8624	1	1	1		1			1	1	23:30:00	1	6:10	4.5	1	1	0	3	2	1	1	0	0	0	0	2	2	0	0	No	11	1	1	3	2	1	0	3	1	1	0
1	210	Shandong	2	1	2	19	166	55	19.9594	1	1	1		1			2	3	23:00:00	2	6:15	6.5	3	1	0	2	1	2	2	1	0	0	1	1	1	0	0	No	7	1	2	1	0	1	0	2	1	0	0
2	211	Jiangsu	1	1	1	16	178	113	35.6647	1	1	1		1			3	2	22:30:00	0	06:30:00	7.5	4	1	0	1	0	0	1	0	1	3	2	1	0	0	0	No	3	1	0	0	0	1	0	1	1	0	0
1	212	Shandong	2	1	2	20	158	54	21.6311	1	1	1		1			3	3	22:00	1	06:40:00	5.5	2	1	0	2	1	0	0	0	0	0	2	0	0	0	0	No	10	1	1	2	3	1	0	2	1	0	0
2	213	Tianjin	2	1	1	20	175	70	22.8571	1	1	1		2	3	3	1	2	1:30	0	7:25	10	6	0	0	0	0	0	0	0	0	0	0	0	0	0	0	No	0	0	0	0	0	0	0	0	1	0	1
1	214	Jiangsu	1	1	2	17	160	59.5	23.2422	1	1	1		1			2	3	23:30:00	2	06:40:00	6.5	3	1	0	1	1	2	1	0	0	0	0	1	1	0	0	No	6	1	2	1	0	1	0	1	1	0	0
1	215	Jiangsu	1	1	1	17	182	66.5	20.0761	1	1	1		1			2	3	00:00:00	0	06:40:00	3	1	0	0	0	0	0	0	0	0	0	3	0	0	0	0	No	7	0	0	3	3	1	0	0	0	0	1
1	216	Jiangsu	1	1	2	17	165	50	18.3655	1	1	1		2	1	3	1	3	1:30	0	06:30:00	4.5	1	2	0	3	1	0	0	0	0	0	1	1	0	1	0	No	8	2	0	3	0	1	0	2	0	1	0
1	217	Shandong	2	1	2	19	164	51	18.9619	1	1	1		1			2	3	23:30:00	3	6:20	5.5	2	2	1	3	1	3	0	0	0	0	0	0	0	0	0	No	11	2	3	2	1	0	1	2	1	0	0
1	218	Shandong	2	1	2	19	173	73	24.3911	1	1	1		1			2	3	23:00:00	0	6:20	6.5	3	0	0	1	0	0	0	0	0	0	0	0	0	0	0	No	2	0	0	1	0	0	0	1	1	0	0
1	219	Jiangsu	1	1	2	17	158	54	21.6311	1	1	1		1			1	3	23:10	1	6:20	6.5	3	1	0	0	0	0	0	0	0	0	0	0	0	0	0	No	3	1	1	1	0	0	0	0	0	0	1
1	220	Shandong	2	2	1	18	189	64	17.9166	3	1	1		1			2	3	23:00:00	0	6:10	6.5	3	1	0	3	1	1	0	0	0	0	2	0	0	0	0	No	6	1	1	1	0	1	0	2	1	0	1
1	221	Jiangsu	1	1	2	17	161	45	17.3604	1	1	1		1			2	1	23:30:00	2	06:40:00	6.5	3	2	0	2	1	2	1	0	0	2	1	0	0	0	0	No	8	2	2	1	0	1	0	2	1	1	1
1	222	Shandong	2	1	2	19	160	58	22.6562	1	1	1		1			2	3	23:30:00	0	6:15	6.5	3	1	0	2	2	0	0	0	0	0	0	0	0	0	0	No	4	1	0	1	0	0	0	2	1	0	1
2	223	Jiangsu	1	1	2	19	168	69	24.4473	1	1	1		1			2	3	21:50:00	0	6:20	7.5	4	0	0	0	0	0	0	0	0	0	0	0	0	0	0	No	0	0	0	0	0	0	0	0	1	0	0
1	224	Jiangsu	1	1	2	16	165	63	23.1405	1	1	1		1			2	3	23:15:00	0	06:30:00	5.5	2	1	0	2	1	0	0	1	2	1	0	2	0	1	0	No	7	1	0	2	1	1	0	2	0	1	0
1	225	Jiangsu	1	1	2	18	176	51.5	16.6258	1	1	1		1			2	3	22:45	0	6:20	6.5	3	1	0	0	1	0	1	0	0	0	0	2	0	0	2	staying up late to work or study	4	1	0	1	0	1	0	1	1	1	1
1	226	Shandong	2	1	2	20	155	60	24.974	1	1	1		1			1	2	23:30:00	0	06:40:00	5.5	2	1	0	2	1	1	1	2	0	0	1	1	1	1	0	No	8	1	1	2	1	1	0	2	1	1	0
2	227	Shandong	2	1	1	18	185	80	23.3747	1	1	1		1			3	1	22:30:00	0	07:00:00	8.5	5	0	0	0	0	0	0	0	0	0	0	0	0	0	0	No	0	0	0	0	0	0	0	0	0	0	0
1	228	Jiangsu	1	1	2	17	160	49	19.1406	1	1	1		1			2	2	22:30:00	1	06:30:00	6.5	3	0	0	2	1	0	0	0	0	0	1	1	0	0	0	No	6	0	1	1	1	1	0	2	1	0	1
1	229	Shandong	2	2	2	18	163	56	21.0772	1	1	1		2	1	1	1	1	23:00:00	0	6:00	6.5	3	1	0	2	1	0	1	3	0	0	0	0	2	0	0	No	5	1	0	1	0	1	0	2	1	0	0
1	230	Jiangsu	1	1	2	17	168	60	21.2585	1	1	1		1			2	3	00:00:00	1	06:40:00	6.5	3	2	0	3	3	3	2	2	0	0	2	2	3	2	0	No	10	2	2	1	0	2	0	3	1	1	1
2	231	Jiangsu	1	1	2	16	164	57	21.1927	1	1	1		1			1	3	22:40:00	0	6:10	7.5	4	0	0	0	0	0	0	1	0	0	0	0	0	0	0	No	1	0	0	0	0	1	0	0	0	0	1
1	232	Jiangsu	1	1	1	18	160	50	19.5312	1	1	1		1			1	1	22:30:00	0	7:30	3	1	0	0	0	0	0	0	0	0	0	0	0	0	0	0	No	6	0	0	3	3	0	0	0	1	0	0
1	233	Shandong	2	1	2	19	172	55	18.5911	1	1	1		1			1	3	23:00:00	3	6:20	6.5	3	0	0	1	1	0	1	0	0	0	1	0	1	0	1	mood problems	5	0	2	1	0	1	0	1	1	0	0
2	234	Shandong	2	1	2	18	164	67	24.9108	1	1	1		1			1	3	22:40:00	0	6:05	7.5	4	1	1	1	1	1	1	0	1	1	0	0	0	1	0	No	5	1	1	0	0	1	1	1	0	0	0
1	235	Jiangsu	1	1	2	16	160	70	27.3438	1	1	1		1			1	3	23:00:00	0	06:30:00	5.5	2	0	0	3	3	0	0	1	0	2	0	0	0	0	0	No	8	0	0	2	2	1	0	3	0	1	1
1	236	Jiangsu	1	1	1	17	172	65	21.9713	1	1	1		1			2	3	00:00:00	1	6:50	5.5	2	1	0	2	1	0	0	0	0	0	0	0	0	0	0	No	7	1	1	2	1	0	0	2	1	1	0
1	237	Shandong	2	1	2	18	157	45	18.2563	1	1	1		1			2	3	23:10	2	6:10	6.5	3	1	0	2	1	0	0	0	0	0	1	0	0	1	3	the dormitory environment affects sleep	6	1	1	1	0	1	0	2	1	1	0
1	238	Jiangsu	1	1	1	16	180	90	27.7778	1	1	1		1			2	3	22:30:00	0	6:50	6.5	3	0	0	0	0	0	0	0	0	0	0	0	0	0	0	No	2	0	0	1	1	0	0	0	1	0	0
1	239	Shandong	2	1	2	18	158	45	18.026	1	1	1		1			2	3	23:00:00	1	06:30:00	6.5	3	0	0	2	0	0	0	0	0	0	0	0	1	0	0	No	4	0	1	1	0	1	0	1	1	1	0
1	240	Jiangsu	1	1	2	16	175	85	27.7551	1	1	1		1			3	1	23:20:00	2	07:00:00	4.5	1	0	0	0	0	0	0	0	0	0	0	0	0	0	0	No	7	0	1	3	3	0	0	0	1	0	0
1	241	Jiangsu	1	1	2	17	165	50	18.3655	1	1	1		1			3	1	23:00:00	1	06:40:00	6.5	3	1	0	0	0	0	0	0	0	0	0	0	0	0	0	No	3	1	1	1	0	0	0	0	0	0	0
1	242	Jiangsu	1	4	2	17	170	70	24.2215	1	1	1		1			2	2	23:30:00	1	06:30:00	5.5	2	2	0	3	2	2	1	0	0	2	0	1	1	0	0	No	11	2	2	2	1	1	0	3	1	0	1
1	243	Shandong	2	1	1	19	180	65	20.0617	1	1	1		1			2	3	23:00:00	1	6:00	6.5	3	1	0	3	1	0	0	0	0	0	2	0	0	0	0	No	6	1	1	1	0	1	0	2	1	0	0
1	244	Jiangsu	1	1	1	16	178	95	29.9836	1	1	1		2	1	1	2	3	23:00:00	1	06:40:00	6.5	3	1	0	2	2	1	0	1	0	0	0	0	0	0	0	No	6	1	1	1	0	1	0	2	1	0	1
1	245	Jiangsu	1	1	2	18	165	70	25.7117	3	1	1		1			2	1	22:30:00	2	6:00	6.5	3	1	0	2	1	2	2	0	0	0	0	2	0	0	0	No	7	1	2	1	0	1	0	2	0	0	0
1	246	Shandong	2	3	1	20	178	55	17.3589	1	1	1		1			2	3	22:30:00	1	05:50:00	6.5	3	2	0	0	1	2	3	2	0	0	0	0	1	0	0	No	7	2	2	1	0	1	0	1	0	0	0
1	247	Jiangsu	1	1	2	16	170	80	27.6817	1	1	1		1			1	3	22:00	2	6:20	4.5	1	2	0	3	1	3	0	3	0	0	0	0	1	0	0	No	14	2	3	3	3	1	0	2	0	1	0
1	248	Shandong	2	1	1	18	183	80	23.8884	1	1	1		1			2	1	23:30:00	0	6:25	5.5	2	1	0	3	1	2	0	0	0	0	0	0	1	0	0	No	8	1	1	2	1	1	0	2	0	0	1
2	249	Jiangsu	1	1	1	16	170	50	17.301	1	1	1		1			1	3	22:00	1	06:30:00	7.5	4	0	0	0	0	0	0	1	0	0	0	0	0	0	0	No	2	0	1	0	0	1	0	0	0	0	0
1	250	Shandong	2	1	1	21	175	85	27.7551	1	1	1		1			2	3	22:30:00	0	07:00:00	6.5	3	1	0	2	0	0	0	0	0	0	0	0	0	0	0	No	4	1	0	1	1	0	0	1	1	1	1
1	251	Jiangsu	1	2	1	16	181	55	16.7883	1	1	1		1			2	3	00:00:00	0	06:30:00	6.5	3	2	0	3	0	1	0	0	0	0	0	0	0	1	0	No	7	2	1	1	0	1	0	2	1	1	0
2	252	Jiangsu	1	1	2	16	170	65	22.4913	1	1	1		1			1	2	22:40:00	1	6:10	7.5	4	1	0	0	0	0	0	0	0	0	0	0	1	0	0	No	3	1	1	0	0	1	0	0	0	0	0
1	253	Shandong	2	1	2	18	160	55	21.4844	1	1	1		1			1	3	23:30:00	0	05:50:00	5.5	2	0	0	3	2	0	2	0	0	3	0	3	0	0	0	No	6	0	0	2	0	1	0	3	0	0	1
1	254	Jiangsu	1	1	2	17	160	65	25.3906	1	1	1		1			2	3	23:00:00	0	06:30:00	6.5	3	1	0	1	1	0	0	0	0	1	0	0	0	0	0	No	4	1	0	1	0	1	0	1	0	1	0
1	255	Jiangsu	1	1	2	17	166	57	20.6852	1	1	1		1			2	2	23:00:00	0	6:20	6.5	3	2	0	2	1	2	3	0	0	0	1	0	2	0	0	No	7	2	1	1	0	1	0	2	1	0	1
1	256	Jiangsu	1	1	2	17	165	50	18.3655	1	1	1		1			2	3	22:10:00	0	06:40:00	6.5	3	1	0	1	0	1	1	0	0	0	2	0	1	1	0	No	6	1	1	1	1	1	0	1	1	0	1
1	257	Shandong	2	1	2	17	151	43	18.8588	1	1	1		1			2	1	23:00:00	1	6:10	6.5	3	2	0	3	2	2	3	0	1	0	1	0	2	0	1	repeated thoughts in bed	9	2	2	1	0	1	0	3	1	0	0
1	258	Jiangsu	1	1	2	17	165	54	19.8347	1	1	1		1			1	1	23:20:00	1	6:20	5.5	2	1	0	3	2	1	1	0	3	0	1	3	1	2	1	No	10	1	1	2	1	2	0	3	1	0	1
1	259	Jiangsu	1	3	2	16	165	45	16.5289	1	1	1		1			2	1	23:00:00	0	06:40:00	6.5	3	0	0	3	2	0	0	0	0	0	3	0	1	0	0	No	5	0	0	1	0	1	0	3	1	1	1
1	260	Jiangsu	1	1	2	17	166	70	25.4028	1	1	1		1			2	3	00:00:00	1	5:30	4.5	1	3	0	3	3	2	2	1	2	3	3	2	2	2	0	No	14	3	2	3	1	2	0	3	0	0	1
2	261	Jiangsu	1	1	2	16	160	55	21.4844	1	1	1		1			1	3	23:00:00	0	6:10	7.5	4	1	0	0	1	0	0	0	0	0	0	0	0	0	0	No	2	1	0	0	0	0	0	1	1	0	0
2	262	Shandong	2	1	2	21	162	67	25.5296	1	1	1		1			2	2	23:00:00	1	7:20	7.5	4	0	0	1	0	1	1	0	0	0	0	0	0	0	0	No	3	0	1	0	0	1	0	1	1	0	0
1	263	Shandong	2	1	2	20	165	60	22.0386	1	1	1		1			1	3	23:30:00	0	6:15	5.5	2	0	0	0	0	0	0	0	0	0	0	0	0	0	0	No	3	0	0	2	1	0	0	0	1	1	0
2	264	Jiangsu	1	1	1	16	170	48	16.609	1	1	1		1			2	3	22:30:00	0	06:30:00	7.5	4	0	0	0	1	1	0	1	0	0	0	0	0	0	0	No	3	0	1	0	0	1	0	1	1	0	0
1	265	Jiangsu	1	1	2	17	163	59	22.2063	1	1	1		1			1	1	22:30:00	1	06:30:00	6.5	3	1	0	1	0	0	2	0	0	0	0	0	0	0	0	No	6	1	1	1	1	1	0	1	0	0	0
1	266	Jiangsu	1	1	1	16	175	75	24.4898	1	1	1		1			2	3	23:00:00	2	6:00	6.5	3	3	0	3	3	3	2	3	2	0	2	3	0	0	0	No	12	3	3	1	0	2	0	3	0	0	0
1	267	Jiangsu	1	1	2	17	168	52	18.424	1	1	1		1			1	1	23:30:00	3	06:30:00	6.5	3	2	2	2	2	2	2	1	0	0	0	1	0	0	0	No	11	2	3	1	0	1	2	2	0	0	0
1	268	Shandong	2	1	2	19	161	50	19.2894	1	1	1		1			2	3	23:00:00	0	05:50:00	5.5	2	2	0	3	2	0	0	1	0	0	0	3	0	0	1	staying up late to work or study	9	2	0	2	1	1	0	3	1	0	0
1	269	Jiangsu	1	1	2	17	166	60	21.7738	1	1	1		1			3	3	00:00:00	0	5:30	4.5	1	2	0	2	0	0	0	0	0	0	0	2	0	1	0	No	8	2	0	3	1	1	0	1	0	0	1
1	270	Jiangsu	1	1	2	17	161	54	20.8325	1	1	1		1			1	2	23:00:00	0	6:00	6.5	3	1	0	1	1	0	0	0	1	0	0	0	0	0	1	staying up late to work or study	4	1	0	1	0	1	0	1	0	0	0
1	271	Jiangsu	1	1	2	16	177	95	30.3233	1	1	1		1			1	3	00:00:00	0	06:00:00	6.5	3	1	0	2	1	0	2	0	0	0	0	2	2	2	0	No	5	1	0	1	0	1	0	2	1	1	0
1	272	Jiangsu	1	3	2	16	160	58	22.6562	1	1	1		1			4	3	22:50:00	2	6:25	6.5	3	1	0	3	2	3	0	1	1	2	2	2	2	1	0	No	10	1	3	1	0	2	0	3	1	1	1
1	273	Jiangsu	1	1	2	18	163	70	26.3465	1	1	1		1			2	3	23:15:00	3	6:00	6.5	3	1	0	3	2	3	1	2	1	2	2	2	2	1	0	No	10	1	3	1	0	2	0	3	1	1	1
2	274	Jiangsu	1	1	2	17	168	75	26.5731	1	1	1		1			2	2	23:00:00	1	6:15	7.5	4	0	0	2	1	0	2	2	0	0	0	0	1	0	0	No	4	0	1	0	0	1	0	2	1	1	1
1	275	Jiangsu	1	1	1	17	175	75	24.4898	1	1	1		2	1	1	2	3	23:00:00	2	06:30:00	6.5	3	1	0	1	1	0	0	0	0	0	1	0	0	0	0	No	5	1	1	1	0	1	0	1	1	1	0
2	276	Shandong	2	1	2	19	168	50	17.7154	1	1	1		1			2	3	23:30:00	0	6:00	7.5	4	1	0	0	0	0	0	0	0	0	0	0	0	0	0	No	1	1	0	0	0	0	0	0	0	1	0
1	277	Jiangsu	1	3	2	18	155	55	22.8928	1	1	1		1			2	3	22:30:00	0	6:25	6.5	3	2	0	2	1	1	0	0	0	1	0	2	1	0	0	No	8	2	1	1	1	1	0	2	0	0	0
1	278	Jiangsu	1	1	2	16	173	65	21.7181	1	1	1		1			2	3	22:30:00	0	6:25	6.5	3	0	0	0	1	0	0	0	0	0	0	0	0	0	0	No	3	0	0	1	1	0	0	1	0	0	0
1	279	Jiangsu	1	1	2	16	162	65	24.7676	1	1	1		1			3	1	00:00:00	3	06:30:00	5.5	2	2	0	3	2	2	0	2	0	0	1	0	0	2	0	No	11	2	3	2	0	1	0	3	1	1	0
1	280	Shandong	2	1	2	18	170	54	18.6851	1	1	1		2	1	1	2	1	00:30:00	2	6:15	5.5	2	2	0	3	3	2	2	2	0	0	0	3	1	2	2	staying up late to work or study	11	2	2	2	0	2	0	3	0	1	1
1	281	Shandong	2	1	2	18	168	53	18.7783	1	1	1		1			2	3	23:50:00	0	6:10	5.5	2	0	0	3	0	0	0	0	0	0	0	0	0	0	0	No	4	0	0	2	0	0	0	2	1	1	1
1	282	Jiangsu	1	1	2	18	168	57	20.1956	1	1	1		1			1	1	22:30:00	3	6:15	3	1	1	0	0	0	0	1	1	0	0	0	0	0	0	0	No	10	1	2	3	3	1	0	0	1	0	1
1	283	Jiangsu	1	1	1	16	178	65	20.5151	1	1	1		1			3	3	00:30:00	0	06:30:00	4.5	1	3	0	3	0	0	0	0	0	3	0	0	2	0	0	No	10	3	0	3	1	1	0	2	0	1	1
2	284	Shandong	2	1	2	19	163	70	26.3465	1	1	1		1			1	3	22:30:00	0	06:00:00	7.5	4	0	0	3	0	0	0	0	0	0	0	0	0	0	0	No	2	0	0	0	0	0	0	2	0	0	1
1	285	Jiangsu	1	1	2	16	160	55	21.4844	1	1	1		1			3	3	22:40:00	1	06:30:00	6.5	3	1	0	0	0	0	0	1	0	0	0	0	1	0	0	No	5	1	1	1	1	1	0	0	0	0	0
1	286	Jiangsu	1	2	2	16	165	75	27.5482	1	1	1		1			1	3	23:00:00	2	06:40:00	6.5	3	1	1	1	0	1	0	0	1	0	0	1	0	0	0	No	7	1	2	1	0	1	1	1	0	0	0
1	287	Jiangsu	1	1	2	16	164	57	21.1927	1	1	1		1			2	3	23:00:00	1	06:45:00	5.5	2	2	0	2	0	2	2	0	2	0	2	2	0	1	0	No	10	2	2	2	2	1	0	1	0	1	0
1	288	Jiangsu	1	1	2	17	158	59	23.634	1	1	1		1			2	1	23:50:00	1	6:20	6.5	3	2	0	3	2	2	2	0	0	0	2	0	0	0	0	No	9	2	2	1	0	1	0	3	1	1	0
2	289	Jiangsu	1	1	2	20	170	57	19.7232	1	1	1		1			2	3	22:30:00	0	07:10:00	7.5	4	1	0	0	0	0	1	0	0	0	0	0	0	0	0	No	2	1	0	0	0	1	0	0	1	0	1
1	290	Shandong	2	1	2	19	163	54	20.3244	1	1	1		1			1	3	23:00:00	0	07:00:00	5.5	2	0	0	1	1	1	0	1	1	0	1	1	0	0	0	No	7	0	1	2	2	1	0	1	1	0	0
2	291	Shandong	2	1	2	18	160	57	22.2656	1	1	1		1			1	3	23:00:00	0	05:40:00	7.5	4	1	0	3	1	0	1	1	0	1	0	1	0	0	0	No	4	1	0	0	0	1	0	2	1	0	0
1	292	Shandong	2	1	2	18	152	61	26.4024	1	1	1		1			1	3	23:59	3	5:30	5.5	2	1	0	3	0	0	0	0	0	0	0	3	0	0	0	No	8	1	2	2	0	1	0	2	1	1	1
1	293	Shandong	2	1	2	18	168	58	20.5499	1	1	1		1			1	3	23:30:00	2	6:00	6.5	3	1	0	2	1	2	2	1	0	0	0	0	0	0	0	No	7	1	2	1	0	1	0	2	1	0	0
1	294	Jiangsu	1	1	2	16	164	52.5	19.5196	1	1	1		1			3	3	23:00:00	1	06:30:00	6.5	3	1	0	2	0	0	1	1	0	0	0	0	0	0	0	No	5	1	1	1	0	1	0	1	0	0	0
1	295	Jiangsu	1	1	2	16	172	54	18.2531	1	1	1		1			1	3	23:00:00	0	6:20	6.5	3	0	0	3	1	0	1	0	0	0	0	0	0	0	0	No	4	0	0	1	0	1	0	2	1	0	0
2	296	Jiangsu	1	1	2	19	160	54	21.0938	1	1	1		1			4	1	22:00	1	06:40:00	9.5	6	0	0	0	0	0	0	0	0	0	0	0	0	0	0	No	1	0	1	0	0	0	0	0	0	0	0
1	297	Jiangsu	1	1	2	16	160	50	19.5312	1	1	1		1			4	3	23:30:00	0	6:05	6.5	3	1	0	2	1	0	0	0	0	0	0	0	0	0	0	No	4	1	0	1	0	0	0	2	1	0	1
1	298	Shandong	2	1	2	18	158	40	16.0231	1	1	1		1			2	3	23:30:00	1	06:30:00	6.5	3	1	0	3	2	1	2	2	0	0	2	2	2	2	0	No	8	1	1	1	0	2	0	3	1	1	1
2	299	Jiangsu	1	1	2	16	170	75	25.9516	1	1	1		1			1	3	23:10:00	0	06:30:00	7.5	4	1	0	3	0	1	0	1	3	2	3	0	0	1	0	No	6	1	1	0	0	2	0	2	1	1	1
1	300	Jiangsu	1	3	2	17	162	48	18.2899	1	1	1		1			2	3	23:20:00	1	06:30:00	6.5	3	1	0	1	1	0	1	0	2	0	2	2	1	1	0	No	5	1	1	1	0	1	0	1	1	0	0
1	301	Jiangsu	1	1	1	16	178	80	25.2493	1	1	1		1			1	2	22:30:00	0	7:30	6.5	3	1	0	3	3	0	0	0	0	0	0	0	0	0	0	No	7	1	0	1	2	0	0	3	1	1	1
2	302	Jiangsu	1	1	2	16	153	49	20.9321	1	1	1		1			4	3	22:30:00	0	6:20	7.5	4	1	0	0	1	0	0	0	0	0	0	0	0	0	0	No	2	1	0	0	0	0	0	1	1	0	0
1	303	Jiangsu	1	1	2	16	164	65	24.1672	1	1	1		1			2	1	22:30:00	0	7:30	6.5	3	0	0	0	0	0	0	0	0	0	0	0	0	0	0	No	3	0	0	1	2	0	0	0	0	0	0
1	304	Jiangsu	1	1	2	16	165	57	20.9366	1	1	1		1			2	1	23:00:00	0	06:35:00	6.5	3	0	0	1	1	0	0	1	0	0	0	0	0	0	0	No	3	0	0	1	0	1	0	1	0	1	0
1	305	Jiangsu	1	1	2	16	166	47	17.0562	1	2	1		1			1	2	23:30:00	3	06:35:00	5.5	2	1	0	1	0	0	1	2	0	0	0	0	0	0	1	the dormitory environment affects sleep	8	1	2	2	1	1	0	1	1	1	0
1	306	Shandong	2	1	2	18	158	45	18.026	1	1	1		1			1	3	23:30:00	0	6:10	4.5	1	1	0	2	1	0	0	0	0	0	0	0	0	1	0	No	9	1	0	3	2	1	0	2	0	1	0
1	307	Shandong	2	1	2	20	163	53	19.9481	1	1	1		1			2	3	22:30:00	2	6:20	6.5	3	1	2	1	1	3	1	1	1	0	0	2	0	3	1	Sickness	10	1	3	1	1	1	2	1	1	0	0
1	308	Jiangsu	1	1	2	16	168	65	23.03	1	1	1		1			1	1	23:00:00	0	6:00	5.5	2	1	0	2	1	1	2	0	0	0	1	2	0	0	1	staying up late to work or study	8	1	1	2	1	1	0	2	0	0	1
2	309	Jiangsu	1	1	2	16	168	70	24.8016	1	1	1		1			1	3	23:30:00	1	06:30:00	7.5	4	2	0	2	1	1	1	1	1	0	0	1	0	0	0	No	6	2	1	0	0	1	0	2	0	0	0
1	310	Jiangsu	1	1	2	17	156	64	26.2985	1	1	1		1			1	1	23:30:00	0	6:15	6.5	3	1	0	1	0	0	0	0	0	0	0	0	0	0	0	No	3	1	0	1	0	0	0	1	0	1	0
1	311	Jiangsu	1	1	2	17	166	58	21.048	1	1	1		1			1	1	22:30:00	1	06:30:00	6.5	3	1	0	2	1	2	2	0	1	0	0	0	3	0	0	No	8	1	2	1	1	1	0	2	0	0	0
2	312	Jiangsu	1	1	2	16	165	70	25.7117	1	1	1		1			1	2	23:40	0	7:30	7.5	4	1	0	3	3	1	1	0	0	0	1	0	1	1	0	No	6	1	1	0	0	1	0	3	1	0	1
2	313	Jiangsu	1	3	2	16	171	60	20.5191	1	1	1		1			3	2	23:10:00	0	6:25	7.5	4	0	0	0	0	0	0	0	0	0	0	0	0	0	0	No	0	0	0	0	0	0	0	0	0	0	1
1	314	Jiangsu	1	1	2	17	165	60	22.0386	1	1	1		1			2	3	22:00	3	06:30:00	5.5	2	2	0	3	2	1	0	0	0	0	1	0	0	0	0	No	12	2	2	2	2	1	0	3	0	1	0
1	315	Jiangsu	1	1	2	16	160	56	21.875	1	1	1		1			1	3	22:50:00	0	6:15	6.5	3	1	0	1	1	1	0	0	0	0	0	0	0	0	0	No	4	1	1	1	0	0	0	1	0	0	0
1	316	Jiangsu	1	1	2	16	158	49.5	19.8286	1	1	1		1			1	2	22:50:00	0	6:20	6.5	3	1	0	1	1	1	0	0	0	0	0	0	0	0	0	No	4	1	1	1	0	0	0	1	0	0	0
1	317	Jiangsu	1	1	2	16	163	51	19.1953	1	1	1		1			4	1	22:30:00	0	6:10	5.5	2	1	0	0	0	0	0	0	0	0	0	0	0	0	0	No	5	1	0	2	2	0	0	0	0	0	1
1	318	Jiangsu	1	1	1	16	181	82	25.0298	1	1	1		1			1	1	23:00:00	0	07:00:00	6.5	3	3	0	3	3	3	0	0	0	0	3	0	0	0	0	No	11	3	2	1	1	1	0	3	0	1	0
1	319	Jiangsu	1	1	1	17	180	90	27.7778	1	1	1		1			2	1	00:00:00	2	7:30	5.5	2	3	0	3	3	2	1	0	3	3	0	3	0	3	2	No	14	3	2	2	2	2	0	3	1	1	0
2	320	Jiangsu	1	1	1	17	178	67	21.1463	1	1	1		1			1	3	22:00	0	06:40:00	7.5	4	1	0	0	0	0	0	0	0	0	0	0	0	0	0	No	1	1	0	0	0	0	0	0	1	0	0
1	321	Jiangsu	1	1	1	16	177	57	18.194	1	1	1		1			2	3	23:30:00	0	06:30:00	6.5	3	2	0	3	2	2	0	1	0	0	0	0	0	0	0	No	8	2	1	1	0	1	0	3	1	1	0
1	322	Jiangsu	1	1	1	17	175	72	23.5102	1	1	1		1			1	3	00:00:00	0	06:30:00	6.5	3	1	0	2	1	0	0	0	0	0	0	0	0	0	0	No	4	1	0	1	0	0	0	2	1	1	0
1	323	Jiangsu	1	1	2	17	163	60	22.5827	1	1	1		1			3	1	23:20:00	0	06:30:00	6.5	3	1	0	1	1	0	1	0	1	1	0	1	0	1	0	No	4	1	0	1	0	1	0	1	1	1	0
1	324	Jiangsu	1	1	2	16	173	90	30.0712	1	1	1		1			3	1	23:10	0	06:30:00	5.5	2	1	0	2	1	0	0	0	0	0	0	0	2	0	0	No	7	1	0	2	1	1	0	2	0	0	0
1	325	Jiangsu	1	1	2	16	163	57	21.4536	1	1	1		1			1	1	22:30:00	0	7:30	5.5	2	0	0	1	0	0	1	0	0	0	0	0	1	0	1	the dormitory environment affects sleep	7	0	0	2	3	1	0	1	0	0	1
1	326	Jiangsu	1	1	2	17	168	60	21.2585	1	1	1		1			2	3	22:30:00	0	7:30	5.5	2	1	0	1	1	1	1	1	0	0	1	1	1	0	1	mood problems	9	1	1	2	3	1	0	1	1	1	1
1	327	Jiangsu	1	1	2	16	154	73	30.7809	1	1	1		1			1	3	23:00:00	0	6:20	6.5	3	1	0	1	1	0	0	0	0	0	0	0	0	0	0	No	3	1	0	1	0	0	0	1	0	1	0
2	328	Jiangsu	1	3	2	18	163	58	21.83	1	1	1		1			1	3	22:00	0	06:00:00	7.5	4	1	0	0	0	0	0	0	0	0	0	0	1	0	0	No	2	1	0	0	0	1	0	0	1	0	0
1	329	Jiangsu	1	1	2	16	170	70	24.2215	1	1	1		1			1	3	23:00:00	0	6:10	6.5	3	2	0	3	1	1	0	0	0	0	2	3	0	2	0	No	7	2	1	1	0	1	0	2	1	1	0
1	330	Jiangsu	1	1	2	16	162	62	23.6244	1	1	1		1			1	1	23:30:00	1	06:45:00	5.5	2	1	0	0	1	1	1	0	0	0	0	0	0	0	0	No	7	1	1	2	1	1	0	1	0	1	0
1	331	Jiangsu	1	1	2	18	162	50	19.052	1	1	1		1			3	1	23:10:00	1	6:20	5.5	2	1	0	3	1	0	0	0	0	0	0	0	0	0	0	No	7	1	1	2	1	0	0	2	0	0	1
1	332	Jiangsu	1	1	2	18	156	85	34.9277	1	1	1		1			2	3	23:00:00	3	06:00:00	5.5	2	1	0	2	2	3	2	0	1	0	1	3	0	1	0	No	10	1	3	2	1	1	0	2	0	1	1
1	333	Shandong	2	1	2	20	167	53	19.0039	1	1	1		1			2	3	23:00:00	2	06:05:00	6.5	3	1	0	0	0	3	0	0	0	0	0	0	1	0	2	stressed out state	6	1	3	1	0	1	0	0	1	1	0
1	334	Shandong	2	1	1	19	167	85	30.478	1	1	1		1			1	1	23:50:00	2	07:00:00	6.5	3	3	0	3	2	3	0	0	0	3	0	0	0	0	0	No	11	3	3	1	0	1	0	3	1	1	0
1	335	Shandong	2	1	2	18	158	48	19.2277	1	1	1		1			2	3	23:40	0	6:10	5.5	2	2	0	3	3	0	0	0	0	0	0	0	0	0	0	No	7	2	0	2	0	0	0	3	0	1	1
1	336	Shandong	2	3	2	20	165	54	19.8347	1	1	1		1			1	1	23:30:00	1	6:15	6.5	3	1	0	3	2	0	0	0	0	0	0	0	0	0	2	the dormitory environment affects sleep	7	1	1	1	0	1	0	3	1	0	1
1	337	Jiangsu	1	1	2	16	165	65	23.8751	1	1	1		1			2	1	23:30:00	1	06:30:00	6.5	3	1	0	3	2	1	0	3	0	0	0	0	0	0	0	No	7	1	1	1	0	1	0	3	1	0	0
1	338	Shandong	2	1	2	19	158	46	18.4265	1	1	1		1			2	3	01:00:00	2	7:30	5.5	2	0	3	1	1	1	0	0	0	2	0	0	0	0	0	No	9	0	2	2	0	1	3	1	1	1	0
1	339	Jiangsu	1	1	2	16	158	50	20.0288	1	1	1		1			2	1	22:30:00	0	6:10	6.5	3	0	0	1	1	0	0	0	0	0	0	0	0	0	0	No	2	0	0	1	0	0	0	1	1	1	1
1	340	Jiangsu	1	1	2	16	162	65	24.7676	1	1	1		1			3	2	22:30:00	0	06:30:00	6.5	3	1	0	2	0	0	0	0	0	0	0	0	0	0	0	No	4	1	0	1	1	0	0	1	0	1	0
1	341	Jiangsu	1	1	2	17	170	80	27.6817	1	1	1		1			1	2	22:00	0	08:00:00	6.5	3	0	0	3	1	0	0	0	0	3	0	0	0	0	0	No	6	0	0	1	2	1	0	2	0	1	0
1	342	Jiangsu	1	3	2	17	155	50	20.8117	1	2	1		1			2	1	00:00:00	3	07:00:00	6.5	3	2	0	3	2	3	2	2	1	2	3	0	0	0	2	relationship issues	11	2	3	1	0	2	0	3	0	1	1
1	343	Jiangsu	1	1	2	16	163	70	26.3465	1	1	1		1			1	3	23:30:00	0	6:25	6.5	3	1	0	3	2	1	1	0	0	0	0	1	0	0	0	No	7	1	1	1	0	1	0	3	1	0	0
1	344	Jiangsu	1	1	2	16	166	53.5	19.415	1	1	1		1			1	3	23:20:00	0	06:30:00	5.5	2	2	0	0	1	0	1	0	0	0	1	1	0	1	0	No	7	2	0	2	1	1	0	1	0	1	0
1	345	Shandong	2	1	1	19	170	74	25.6055	1	1	1		1			1	3	22:30:00	2	5:30	6.5	3	2	0	2	2	3	1	0	0	0	2	0	0	0	3	the dormitory environment affects sleep	9	2	3	1	0	1	0	2	1	0	0
1	346	Jiangsu	1	1	2	17	160	48	18.75	1	1	1		1			2	1	23:30:00	1	06:00:00	5.5	2	2	0	2	2	2	3	1	1	0	1	2	0	2	3	No	10	2	2	2	0	2	0	2	0	0	1
1	347	Jiangsu	1	1	2	17	162	55	20.9572	1	1	1		1			1	3	22:50:00	2	06:30:00	6.5	3	1	0	2	2	2	1	1	1	0	0	2	0	0	2	mood problems	7	1	2	1	0	1	0	2	1	1	0
1	348	Shandong	2	1	2	19	165	47	17.2635	1	1	1		1			1	1	23:00:00	0	05:50:00	6.5	3	0	0	0	0	0	0	0	0	0	0	0	0	0	0	No	1	0	0	1	0	0	0	0	0	0	0
1	349	Jiangsu	1	1	1	16	170	46	15.917	1	1	1		1			2	1	23:00:00	0	6:50	6.5	3	1	0	2	1	0	0	0	0	0	1	1	0	0	0	No	6	1	0	1	1	1	0	2	1	0	1
1	350	Jiangsu	1	1	2	16	170	54	18.6851	1	1	1		1			1	3	23:00:00	0	06:45:00	5.5	2	0	0	2	0	0	0	0	0	0	2	2	0	0	0	No	6	0	0	2	2	1	0	1	1	1	1
1	351	Shandong	2	1	2	19	168	50	17.7154	1	1	1		1			3	3	23:50:00	0	06:40:00	6.5	3	1	0	2	1	0	0	0	0	1	0	0	0	0	0	No	5	1	0	1	0	1	0	2	1	0	1
2	352	Jiangsu	1	2	2	16	173	50	16.7062	1	1	1		1			2	3	23:00:00	0	06:53:00	7.5	4	0	0	2	1	0	0	0	0	0	0	2	0	0	0	No	3	0	0	0	0	1	0	2	1	1	0
1	353	Jiangsu	1	1	2	16	155	70	29.1363	1	1	1		1			2	3	23:30:00	0	6:50	6.5	3	1	0	1	1	0	0	0	0	1	0	1	0	0	0	No	4	1	0	1	0	1	0	1	0	1	0
1	354	Shandong	2	1	2	18	161	48	18.5178	1	1	1		1			3	3	00:00:00	0	06:30:00	5.5	2	1	0	3	1	0	0	0	0	0	1	0	0	0	0	No	6	1	0	2	0	1	0	2	1	1	1
1	355	Jiangsu	1	1	2	18	170	60	20.7612	1	1	1		1			2	3	23:40	1	06:30:00	6.5	3	2	0	3	1	1	1	0	0	0	1	0	2	0	0	No	7	2	1	1	0	1	0	2	0	0	0
1	356	Jiangsu	1	2	2	16	164	47	17.4747	1	1	1		1			1	1	22:40:00	0	6:20	6.5	3	1	0	2	1	0	2	0	0	0	0	0	1	0	0	No	5	1	0	1	0	1	0	2	1	0	1
1	357	Jiangsu	1	1	2	16	168	51	18.0697	1	1	1		1			1	3	23:00:00	1	6:15	5.5	2	1	0	1	0	2	0	0	0	0	1	2	0	0	0	No	8	1	2	2	1	1	0	1	0	1	0
1	358	Jiangsu	1	1	2	16	165	75	27.5482	1	1	1		1			1	3	21:20:00	3	06:20:00	4.5	1	1	0	3	3	3	3	2	3	0	3	3	3	3	0	No	16	1	3	3	3	3	0	3	0	1	1
1	359	Jiangsu	1	1	2	16	175	52	16.9796	1	1	1		1			1	3	1:30	3	06:40:00	4.5	1	1	0	2	1	1	0	0	0	0	0	1	0	0	0	No	9	1	2	3	0	1	0	2	1	1	0
1	360	Jiangsu	1	1	2	16	165	52	19.1001	1	1	1		1			3	3	23:00:00	0	06:40:00	6.5	3	0	0	1	1	0	0	0	0	0	0	0	0	0	0	No	2	0	0	1	0	0	0	1	1	0	0
1	361	Jiangsu	1	2	2	16	160	48	18.75	1	1	1		1			1	3	23:40	0	06:40:00	6.5	3	1	0	2	1	0	3	0	0	0	0	0	2	0	0	No	5	1	0	1	0	1	0	2	1	0	1
1	362	Jiangsu	1	1	2	16	168	98	34.7222	1	1	1		1			3	3	22:10:00	2	06:40:00	5.5	2	1	0	3	3	3	0	1	2	1	1	2	2	1	0	No	13	1	3	2	2	2	0	3	1	1	1
1	363	Jiangsu	1	1	1	17	176	91	29.3776	1	1	1		1			1	3	23:00:00	0	6:50	4.5	1	1	0	1	1	0	0	1	0	0	0	0	0	0	0	No	9	1	0	3	3	1	0	1	0	1	0
1	364	Jiangsu	1	1	1	16	180	85	26.2346	1	1	1		2	2	2	1	3	00:00:00	0	06:30:00	6.5	3	0	0	0	0	0	0	0	0	3	0	0	0	0	0	No	2	0	0	1	0	1	0	0	1	1	1
1	365	Jiangsu	1	1	2	16	165	65	23.8751	1	1	1		1			4	2	22:30:00	1	6:20	5.5	2	1	0	3	2	0	0	0	1	0	0	1	0	1	2	staying up late to work or study	10	1	1	2	2	1	0	3	0	0	1
1	366	Jiangsu	1	1	2	17	171	75	25.6489	1	1	1		1			4	1	00:25:00	0	06:30:00	4.5	1	1	0	0	0	0	0	0	0	0	0	0	1	0	0	No	7	1	0	3	2	1	0	0	1	1	0
1	367	Jiangsu	1	1	2	16	160	98	38.2812	1	1	1		1			1	3	23:30:00	0	06:30:00	5.5	2	1	0	0	0	0	0	2	0	3	0	0	0	0	0	No	5	1	0	2	1	1	0	0	0	1	0
1	368	Jiangsu	1	1	2	17	153	50	21.3593	1	1	1		1			2	3	22:40:00	0	06:30:00	5.5	2	1	0	1	0	0	0	0	0	0	0	0	0	0	0	No	6	1	0	2	2	0	0	1	0	1	0
1	369	Jiangsu	1	1	1	18	170	60	20.7612	1	1	1		1			2	1	00:00:00	0	06:40:00	6.5	3	3	0	3	3	0	0	0	0	0	0	0	0	0	0	No	7	3	0	1	0	0	0	3	1	1	0
2	370	Jiangsu	1	3	1	16	176	53	17.11	1	1	1		1			1	3	23:00:00	0	06:30:00	7.5	4	1	0	0	1	0	0	0	0	0	0	0	0	0	0	No	2	1	0	0	0	0	0	1	1	1	1
1	371	Jiangsu	1	1	2	16	170	64	22.1453	1	1	1		1			1	3	22:30:00	1	6:25	6.5	3	1	0	0	0	2	3	0	0	2	0	2	0	0	0	No	6	1	2	1	1	1	0	0	0	0	0
2	372	Jiangsu	1	1	2	16	164	95	35.3212	1	1	1		1			1	1	22:30:00	0	06:30:00	7.5	4	1	0	1	1	0	1	0	0	0	0	1	0	0	0	No	3	1	0	0	0	1	0	1	0	0	0
1	373	Shandong	2	1	2	19	165	67.5	24.7934	1	1	1		1			1	3	23:30:00	1	06:45:00	6.5	3	2	0	3	2	2	2	1	0	2	2	2	1	0	3	the dormitory environment affects sleep	10	2	2	1	0	2	0	3	1	1	0
1	374	Shandong	2	1	2	18	165	59	21.6713	1	1	1		1			2	3	23:00:00	0	6:20	6.5	3	1	0	2	2	0	0	0	0	1	0	1	1	0	0	No	5	1	0	1	0	1	0	2	1	0	0
1	375	Jiangsu	1	1	2	17	170	60	20.7612	1	1	1		1			2	1	23:00:00	0	6:25	5.5	2	2	0	1	1	0	1	1	1	0	1	1	1	1	0	No	8	2	0	2	2	1	0	1	1	1	0
1	376	Jiangsu	1	2	2	16	158	96	38.4554	1	1	1		1			1	1	22:00	0	06:30:00	3	1	0	0	0	0	0	0	1	0	0	0	0	0	0	0	No	7	0	0	3	3	1	0	0	0	0	1
2	377	Jiangsu	1	1	2	16	158	45	18.026	1	1	1		1			1	1	22:40:00	0	6:25	7.5	4	0	0	0	0	0	0	0	0	0	0	0	0	0	0	No	0	0	0	0	0	0	0	0	1	0	1
1	378	Jiangsu	1	1	2	17	170	50	17.301	1	1	1		1			4	2	23:30:00	0	06:30:00	4.5	1	1	0	1	1	0	0	0	0	0	0	0	0	0	0	No	8	1	0	3	3	0	0	1	1	1	1
2	379	Jiangsu	1	1	1	17	175	70	22.8571	1	1	1		1			1	3	23:30:00	0	06:30:00	7.5	4	0	0	1	0	0	0	0	0	0	0	0	0	0	0	No	1	0	0	0	0	0	0	1	1	1	0
1	380	Henan	2	1	2	21	164	45	16.7311	1	1	1		1			3	1	00:00:00	0	07:00:00	6.5	3	1	0	1	1	0	0	1	0	0	1	1	1	0	0	No	4	1	0	1	0	1	0	1	1	0	0
1	381	Jiangsu	1	1	2	16	162	45	17.1468	1	1	1		1			4	3	21:00:00	0	7:30	3.5	1	0	0	0	0	0	0	0	0	0	0	0	0	0	0	No	6	0	0	3	3	0	0	0	0	0	1
1	382	Shandong	2	1	2	19	164	65	24.1672	1	1	1		1			3	1	22:30:00	3	6:00	6.5	3	0	0	0	1	1	0	0	0	0	0	0	0	0	0	No	4	0	2	1	0	0	0	1	0	0	0
1	383	Jiangsu	1	2	2	16	163	48	18.0662	1	1	1		1			3	3	22:50:00	0	6:10	6.5	3	1	0	1	0	0	1	0	0	0	0	0	0	0	0	No	4	1	0	1	0	1	0	1	0	0	0
1	384	Jiangsu	1	1	1	18	175	86	28.0816	1	1	1		2	1	1	1	1	23:25	0	6:20	6.5	3	2	0	3	2	1	1	0	1	0	0	0	0	0	1	the dormitory environment affects sleep	8	2	1	1	0	1	0	3	0	0	0
1	385	Shandong	2	1	2	19	168	50	17.7154	1	1	1		1			2	2	23:00:00	0	6:20	6.5	3	0	0	2	0	0	0	0	0	0	0	2	0	0	0	No	3	0	0	1	0	1	0	1	1	0	0
1	386	Jiangsu	1	1	2	17	160	46	17.9688	1	1	1		1			1	3	22:30:00	0	06:30:00	5.5	2	1	0	2	2	1	2	1	0	0	1	1	1	0	0	No	9	1	1	2	2	1	0	2	1	0	0
1	387	Jiangsu	1	2	1	17	175	90	29.3878	1	1	1		1			2	3	22:30:00	1	06:40:00	5.5	2	0	0	1	1	0	0	0	0	3	0	0	0	0	0	No	7	0	1	2	2	1	0	1	1	0	0
1	388	Shandong	2	1	2	19	162	49	18.6709	1	1	1		1			2	3	00:30:00	3	06:30:00	5.5	2	2	0	3	2	2	0	0	2	0	2	2	0	1	0	No	11	2	3	2	0	1	0	3	1	1	0
1	389	Jiangsu	1	1	1	17	175	90	29.3878	1	1	1		1			4	3	00:00:00	1	07:00:00	3.5	1	2	0	0	0	1	0	2	0	1	1	1	1	1	0	No	10	2	1	3	3	1	0	0	0	0	0
2	390	Jiangsu	1	1	1	16	178	60	18.937	1	1	1		1			3	3	22:30:00	0	7:30	8.5	5	0	0	0	0	0	0	0	0	0	0	0	0	0	0	No	0	0	0	0	0	0	0	0	1	0	0
2	391	Shandong	2	1	2	21	159	53	20.9644	1	1	1		1			2	1	23:00:00	2	7:30	7.5	4	1	0	1	1	2	0	0	0	0	0	0	0	1	0	No	5	1	2	0	0	1	0	1	1	0	0
1	392	Jiangsu	1	3	1	17	182	60	18.1138	1	2	1		1			3	1	23:30:00	1	06:40:00	6.5	3	1	0	3	2	1	0	0	0	0	0	0	0	0	2	mood problems	7	1	1	1	0	1	0	3	1	1	0
1	393	Jiangsu	1	1	2	16	160	50	19.5312	1	1	1		1			1	2	23:00:00	1	6:20	5.5	2	2	0	2	1	1	1	0	0	0	0	2	1	0	0	No	9	2	1	2	1	1	0	2	0	0	0
1	394	Jiangsu	1	1	2	17	170	80	27.6817	1	1	1		1			3	3	23:00:00	0	08:00:00	6.5	3	0	0	0	0	0	0	0	0	0	0	0	0	0	0	No	3	0	0	1	2	0	0	0	0	1	0
1	395	Jiangsu	1	1	1	17	187	100	28.5968	1	1	1		2	2	2	2	2	23:30:00	0	06:55:00	6.5	3	1	0	2	1	0	1	0	0	0	0	0	1	1	0	No	5	1	0	1	0	1	0	2	0	0	0
1	396	Jiangsu	1	2	2	16	170	56	19.3772	1	1	1		1			1	3	23:00:00	1	06:30:00	5.5	2	2	0	3	2	1	2	1	1	2	1	2	1	0	0	No	12	2	1	2	2	2	0	3	1	0	1
2	397	Jiangsu	1	1	2	16	165	65	23.8751	1	1	1		1			2	1	22:40:00	0	06:40:00	8.5	5	1	0	3	1	0	0	0	0	0	0	0	0	0	0	No	3	1	0	0	0	0	0	2	1	0	1
1	398	Jiangsu	1	1	1	17	173	68	22.7204	1	1	1		1			2	2	23:30:00	0	06:40:00	6.5	3	1	0	2	0	0	1	0	0	0	1	0	1	0	0	No	4	1	0	1	0	1	0	1	0	0	0
1	399	Jiangsu	1	1	1	19	180	100	30.8642	1	1	2	10	2	1	4	2	1	02:00:00	3	6:00	4.5	1	3	0	3	3	3	0	0	0	2	2	0	0	0	0	No	13	3	3	3	0	1	0	3	0	0	1
1	400	Jiangsu	1	1	2	16	160	65	25.3906	1	1	1		1			3	1	23:45	0	06:45:00	6.5	3	0	0	0	0	0	0	0	0	1	1	0	0	0	0	No	2	0	0	1	0	1	0	0	1	1	0
1	401	Shandong	2	3	2	18	165	60	22.0386	1	1	1		1			3	3	23:30:00	0	6:20	5.5	2	1	0	2	1	2	0	0	0	0	2	0	2	0	0	No	8	1	1	2	1	1	0	2	1	0	0
1	402	Jiangsu	1	1	1	16	165	98	35.9963	1	1	1		1			2	1	23:00:00	1	06:30:00	6.5	3	1	0	1	0	0	0	0	0	0	1	1	0	0	0	No	5	1	1	1	0	1	0	1	1	1	0
1	403	Jiangsu	1	1	2	16	160	57	22.2656	1	1	1		1			1	3	23:00:00	0	06:30:00	6.5	3	2	0	1	1	1	1	0	0	0	0	0	0	0	0	No	6	2	1	1	0	1	0	1	1	0	0
1	404	Jiangsu	1	2	2	16	167	51.7	18.5378	1	1	1		1			2	3	22:30:00	0	6:20	5.5	2	1	0	0	0	0	1	0	0	0	0	0	0	0	0	No	6	1	0	2	2	1	0	0	1	0	1
2	405	Jiangsu	1	1	2	16	170	53	18.3391	1	1	1		1			2	1	23:00:00	1	7:20	7.5	4	1	0	2	1	1	1	0	0	0	0	0	0	0	0	No	5	1	1	0	0	1	0	2	1	1	1
1	406	Shandong	2	1	1	20	184	72	21.2665	1	1	1		1			2	1	23:30:00	1	06:30:00	6.5	3	3	0	3	2	2	2	2	0	0	2	2	1	0	2	taking time away from sleep for recreation	11	3	2	1	0	2	0	3	1	1	0
1	407	Jiangsu	1	1	2	16	164	62	23.0518	1	1	1		1			1	3	23:30:00	3	06:30:00	5.5	2	1	0	2	1	0	2	1	1	1	0	2	2	1	0	No	10	1	2	2	1	2	0	2	0	0	0
1	408	Jiangsu	1	1	2	17	163	65	24.4646	1	1	1		1			2	3	23:30:00	1	06:30:00	6.5	3	2	0	2	1	1	0	0	0	0	0	0	0	0	0	No	6	2	1	1	0	0	0	2	1	1	0
1	409	Jiangsu	1	1	2	16	162	52	19.8141	1	1	1		1			1	3	23:00:00	0	6:10	6.5	3	1	0	2	1	0	1	0	1	1	0	0	0	0	3	the dormitory environment affects sleep	5	1	0	1	0	1	0	2	0	0	0
2	410	Jiangsu	1	3	2	16	160	45	17.5781	1	1	1		2	1	1	2	1	23:00:00	0	06:30:00	7.5	4	1	0	1	1	0	0	0	1	0	0	0	1	0	0	No	3	1	0	0	0	1	0	1	1	0	1
1	411	Jiangsu	1	1	2	16	168	50	17.7154	1	1	1		1			3	3	23:30:00	1	6:20	5.5	2	2	0	1	1	3	0	0	0	0	1	0	0	1	0	No	9	2	2	2	1	1	0	1	1	0	0
2	412	Jiangsu	1	1	1	16	171	60	20.5191	1	1	1		1			2	2	00:00:00	0	07:00:00	7.5	4	1	0	2	0	1	0	0	3	1	2	0	0	1	0	No	4	1	1	0	0	1	0	1	1	0	0
1	413	Jiangsu	1	1	2	16	160	60	23.4375	1	1	1		1			4	3	23:00:00	2	6:20	5.5	2	0	0	2	1	0	0	0	0	0	0	0	0	0	0	No	6	0	1	2	1	0	0	2	1	0	0
1	414	Jiangsu	1	1	2	16	161	53	20.4467	1	1	1		2	1	1	1	2	23:00:00	2	6:00	5.5	2	2	0	3	3	3	2	0	1	0	0	3	2	3	3	the dormitory environment affects sleep	13	2	3	2	1	2	0	3	1	0	1
1	415	Jiangsu	1	1	2	16	168	60	21.2585	1	1	1		1			1	3	22:00	0	06:30:00	5.5	2	1	0	0	0	0	0	0	0	0	0	0	0	0	0	No	5	1	0	2	2	0	0	0	0	0	1
1	416	Jiangsu	1	1	2	17	172	69	23.3234	1	1	1		1			1	1	23:00:00	0	06:40:00	6.5	3	0	0	0	0	0	0	0	0	0	0	0	0	0	0	No	1	0	0	1	0	0	0	0	0	0	0
2	417	Jiangsu	1	1	1	17	178	60	18.937	1	1	1		1			1	3	23:00:00	0	06:40:00	7.5	4	1	0	0	0	0	0	0	0	0	2	0	0	0	0	No	2	1	0	0	0	1	0	0	0	0	0
2	418	Jiangsu	1	1	2	19	168	55	19.487	1	1	1		1			2	3	23:00:00	0	7:30	7.5	4	0	0	0	0	0	1	0	0	0	0	0	0	0	0	No	1	0	0	0	0	1	0	0	0	0	0
1	419	Jiangsu	1	1	1	16	179	69	21.5349	1	1	1		1			1	2	23:30:00	2	06:30:00	5.5	2	0	0	3	1	3	1	0	0	0	2	2	0	0	0	No	9	0	3	2	1	1	0	2	0	1	0
1	420	Jiangsu	1	1	2	16	173	85	28.4005	1	1	1		1			1	3	23:30:00	0	06:30:00	5.5	2	0	0	0	0	0	0	0	0	0	0	0	0	0	0	No	3	0	0	2	1	0	0	0	0	1	0
1	421	Jiangsu	1	1	2	17	162	55	20.9572	1	1	1		1			1	3	22:30:00	1	05:50:00	6.5	3	1	0	3	1	2	3	0	0	0	0	3	0	0	0	No	7	1	2	1	0	1	0	2	0	1	0
2	422	Jiangsu	1	1	2	16	169	65	22.7583	1	1	1		1			2	1	23:00:00	0	06:30:00	7.5	4	1	0	0	0	0	0	3	0	0	0	0	0	0	0	No	2	1	0	0	0	1	0	0	0	0	0
1	423	Jiangsu	1	3	2	16	163	61	22.9591	1	1	1		1			1	3	23:00:00	1	06:30:00	6.5	3	1	0	2	1	2	2	0	0	0	0	0	1	0	0	No	7	1	2	1	0	1	0	2	1	1	0
2	424	Jiangsu	1	1	2	16	160	44	17.1875	1	1	1		1			2	3	23:00:00	1	06:30:00	7.5	4	0	0	0	0	0	0	0	0	0	0	0	0	0	0	No	1	0	1	0	0	0	0	0	0	0	0
1	425	Jiangsu	1	1	2	19	163	54	20.3244	1	1	1		1			2	3	23:00:00	2	07:00:00	6.5	3	0	0	0	0	2	3	2	0	0	0	3	2	0	0	No	6	0	2	1	1	2	0	0	0	1	0
1	426	Jiangsu	1	1	1	20	170	65	22.4913	1	1	1		1			1	3	22:30:00	1	06:30:00	6.5	3	1	0	1	0	0	0	0	0	0	0	0	0	0	0	No	5	1	1	1	1	0	0	1	0	0	0
1	427	Jiangsu	1	1	2	17	162	52	19.8141	1	1	1		1			2	1	22:50:00	2	06:30:00	6.5	3	1	0	1	1	2	1	0	0	0	0	2	0	0	1	relationship issues	6	1	2	1	0	1	0	1	1	1	1
1	428	Jiangsu	1	1	1	16	163	64	24.0882	1	1	1		1			2	3	23:00:00	0	6:00	5.5	2	1	0	1	0	0	0	0	0	0	0	0	0	0	0	No	5	1	0	2	1	0	0	1	0	0	0
1	429	Shandong	2	1	2	19	162	51	19.433	1	1	1		1			1	3	23:30:00	0	6:20	6.5	3	0	0	3	1	0	0	0	0	0	0	1	0	1	0	No	4	0	0	1	0	1	0	2	1	0	0
1	430	Jiangsu	1	1	2	16	158	60	24.0346	1	1	1		1			1	2	23:00:00	0	06:30:00	6.5	3	1	0	1	0	0	0	0	0	0	0	0	0	1	0	No	4	1	0	1	0	1	0	1	0	0	0
2	431	Jiangsu	1	1	1	17	177	80	25.5354	1	1	1		1			1	3	22:00	0	06:30:00	8.5	5	0	0	0	0	0	0	0	0	0	0	0	0	0	0	No	0	0	0	0	0	0	0	0	0	0	0
1	432	Jiangsu	1	1	1	16	165	47	17.2635	1	1	1		1			1	1	00:00:00	3	06:30:00	3.5	1	2	0	3	2	2	0	1	0	0	1	1	1	1	0	No	15	2	3	3	3	1	0	3	0	0	0
1	433	Jiangsu	1	1	1	16	185	60	17.531	1	1	1		1			1	3	00:00:00	0	6:50	4.5	1	0	0	0	0	0	0	0	0	0	0	0	0	0	0	No	5	0	0	3	2	0	0	0	0	1	0
2	434	Shandong	2	1	2	20	170	64	22.1453	1	1	1		1			2	3	23:00:00	0	7:30	7.5	4	1	0	1	1	1	1	0	0	0	2	0	0	0	2	the dormitory environment affects sleep	4	1	1	0	0	1	0	1	1	0	0
2	435	Jiangsu	1	1	1	20	180	98	30.2469	1	1	1		1			1	2	22:30:00	0	7:30	8.5	5	3	0	3	1	3	0	0	0	0	0	0	0	3	0	No	8	3	2	0	0	1	0	2	0	0	1
1	436	Jiangsu	1	1	2	16	167	55.9	20.0437	1	1	1		1			1	3	22:30:00	0	06:30:00	6.5	3	1	0	0	0	0	0	0	0	0	0	0	0	0	0	No	3	1	0	1	1	0	0	0	1	0	0
2	437	Jiangsu	1	1	2	16	160	94	36.7188	1	1	1		1			1	1	22:00	0	06:40:00	7.5	4	0	0	1	0	0	0	0	0	0	0	3	0	0	0	No	2	0	0	0	0	1	0	1	0	0	0
1	438	Jiangsu	1	1	2	16	172	65	21.9713	1	1	1		1			1	1	23:00:00	1	6:20	5.5	2	1	0	0	0	0	0	1	0	0	0	0	1	0	0	No	6	1	1	2	1	1	0	0	1	1	0
1	439	Jiangsu	1	1	2	16	154	43.5	18.342	1	1	1		1			2	3	23:30:00	2	6:20	5.5	2	1	0	1	1	1	1	0	0	0	0	0	0	0	0	No	8	1	2	2	1	1	0	1	1	1	0
1	440	Jiangsu	1	1	2	16	163	48	18.0662	1	1	1		1			3	1	23:00:00	0	6:10	6.5	3	1	0	1	1	0	0	1	0	0	0	0	0	0	0	No	4	1	0	1	0	1	0	1	0	1	0
1	441	Jiangsu	1	1	2	16	165	50	18.3655	1	1	1		1			2	3	00:30:00	0	06:30:00	5.5	2	0	0	1	0	0	0	0	0	0	0	0	0	0	0	No	3	0	0	2	0	0	0	1	1	1	0
1	442	Jiangsu	1	1	2	17	166	80	29.0318	1	1	1		1			1	1	23:00:00	1	6:05	5.5	2	1	0	3	1	1	1	0	0	0	1	0	0	0	0	No	8	1	1	2	1	1	0	2	1	1	1
1	443	Jiangsu	1	1	2	19	170	60	20.7612	1	1	1		1			1	2	22:30:00	0	07:00:00	6.5	3	1	0	2	1	1	1	0	0	0	0	0	0	0	0	No	7	1	1	1	1	1	0	2	0	0	0
2	444	Shandong	2	1	1	21	180	60	18.5185	1	1	1		1			2	3	23:00:00	1	07:00:00	7.5	4	1	0	1	1	1	0	0	0	0	0	3	0	0	0	No	4	1	1	0	0	1	0	1	1	0	0
1	445	Jiangsu	1	1	1	18	178	75	23.6713	1	1	1		1			3	3	23:00:00	1	6:00	6.5	3	1	0	0	1	2	0	0	0	0	3	0	0	0	0	No	6	1	2	1	0	1	0	1	0	1	1
2	446	Jiangsu	1	1	2	16	170	74	25.6055	1	1	1		1			1	3	23:30:00	0	6:20	7.5	4	1	0	1	1	0	0	0	1	2	2	0	1	0	0	No	3	1	0	0	0	1	0	1	0	0	0
1	447	Jiangsu	1	1	2	16	168	90	31.8878	1	1	1		1			1	3	22:30:00	0	06:30:00	6.5	3	1	0	1	1	0	2	0	0	2	0	0	1	0	0	No	5	1	0	1	1	1	0	1	0	1	0
1	448	Jiangsu	1	1	2	16	160	98	38.2812	1	1	1		1			1	3	22:00	0	06:30:00	5.5	2	1	0	2	1	1	1	1	0	0	0	0	1	0	0	No	9	1	1	2	2	1	0	2	0	1	0
1	449	Shandong	2	1	2	21	169	50	17.5064	1	1	1		1			1	1	23:30:00	1	06:40:00	3	1	1	0	2	2	0	0	0	0	0	0	3	0	0	0	No	11	1	1	3	3	1	0	2	0	1	0
2	450	Shandong	2	1	2	20	160	66	25.7812	1	1	1		1			3	3	23:00:00	0	7:30	7.5	4	0	0	1	0	1	1	0	0	0	0	0	0	0	0	No	3	0	1	0	0	1	0	1	0	0	0
1	451	Jiangsu	1	1	2	16	173	60	20.0474	1	1	1		1			1	1	23:00:00	0	06:40:00	5.5	2	1	0	0	1	0	0	0	0	0	0	0	1	0	0	No	7	1	0	2	2	1	0	1	1	1	0
1	452	Jiangsu	1	1	2	16	165	51	18.7328	1	1	1		1			2	3	23:30:00	2	06:30:00	5.5	2	3	0	1	0	1	2	1	0	0	0	1	0	0	0	No	10	3	2	2	1	1	0	1	1	1	0
1	453	Jiangsu	1	1	2	16	158	40	16.0231	1	1	1		1			1	2	23:00:00	0	06:30:00	6.5	3	1	0	2	1	0	0	0	0	0	0	0	0	0	0	No	4	1	0	1	0	0	0	2	0	0	1
1	454	Jiangsu	1	1	2	17	160	88	34.375	1	1	1		1			1	1	23:00:00	0	6:20	6.5	3	1	0	0	1	0	0	0	0	0	0	0	0	0	0	No	3	1	0	1	0	0	0	1	1	0	0
1	455	Jiangsu	1	1	1	16	171	50	17.0993	1	1	1		1			3	3	23:00:00	0	06:30:00	4.5	1	2	0	3	2	1	2	1	0	0	2	0	0	0	0	No	13	2	1	3	3	1	0	3	1	1	1
1	456	Jiangsu	1	1	2	16	152	90	38.9543	1	1	1		1			2	3	22:30:00	0	6:20	3.5	1	0	0	2	1	0	0	1	0	0	0	0	3	1	1	the dormitory environment affects sleep	9	0	0	3	3	1	0	2	1	1	1
1	457	Jiangsu	1	1	2	16	162	60	22.8624	1	1	1		1			2	3	23:00:00	0	6:10	5.5	2	1	0	3	3	1	2	1	2	1	2	3	3	0	0	No	10	1	1	2	1	2	0	3	1	1	1
1	458	Jiangsu	1	1	1	16	175	72	23.5102	1	1	1		1			1	3	22:30:00	0	7:30	3	1	0	0	0	0	0	0	0	0	0	0	0	0	0	0	No	6	0	0	3	3	0	0	0	0	1	1
2	459	Shandong	2	1	2	20	172	62.5	21.1263	1	1	1		1			1	1	22:30:00	2	07:45:00	7.5	4	1	0	0	1	2	2	0	0	0	2	0	0	0	0	No	6	1	2	0	1	1	0	1	0	0	0
1	460	Jiangsu	1	1	2	16	157	98	39.7582	1	1	1		1			2	3	23:30:00	0	6:20	6.5	3	1	0	2	1	1	2	0	1	0	1	1	0	0	0	No	6	1	1	1	0	1	0	2	0	1	0
2	461	Jiangsu	1	1	2	16	155	90	37.461	1	1	1		1			2	2	22:30:00	1	6:20	7.5	4	1	0	3	0	1	0	0	0	1	3	0	0	0	0	No	5	1	1	0	0	1	0	2	0	1	0
1	462	Jiangsu	1	1	2	16	155	46	19.1467	1	1	1		1			2	3	23:00:00	2	06:30:00	6.5	3	1	0	1	1	1	0	0	0	0	3	2	1	0	0	No	6	1	2	1	0	1	0	1	1	1	0
1	463	Jiangsu	1	1	2	17	163	70	26.3465	1	1	1		1			2	1	23:30:00	0	6:20	6.5	3	1	0	3	2	1	1	1	0	0	0	1	0	0	0	No	7	1	1	1	0	1	0	3	1	1	0
1	464	Henan	2	1	1	19	173	56	18.7109	1	1	1		2	1	1	1	3	22:30:00	0	07:00:00	6.5	3	1	0	2	1	0	0	0	0	2	0	0	0	0	0	No	6	1	0	1	1	1	0	2	1	0	1
2	465	Jiangsu	1	1	2	19	165	65	23.8751	1	1	1		1			1	3	22:30:00	0	07:45:00	7.5	4	1	0	1	0	1	0	0	0	0	0	0	3	0	0	No	5	1	1	0	1	1	0	1	1	1	0
1	466	Jiangsu	1	1	2	18	164	57	21.1927	1	1	1		1			3	3	23:00:00	1	06:30:00	6.5	3	1	0	2	0	0	0	1	0	1	0	0	0	0	0	No	5	1	1	1	0	1	0	1	0	0	1
2	467	Jiangsu	1	1	2	16	170	60	20.7612	1	1	1		1			1	3	23:00:00	0	06:40:00	7.5	4	1	0	0	1	0	2	0	0	0	0	0	0	0	0	No	3	1	0	0	0	1	0	1	1	0	0
1	468	Jiangsu	1	1	2	17	160	82	32.0312	1	1	1		1			2	1	22:30:00	1	6:25	5.5	2	1	0	1	1	1	1	2	0	0	2	1	0	0	0	No	8	1	1	2	2	1	0	1	1	1	1
1	469	Jiangsu	1	1	2	16	166	64	23.2254	1	1	1		1			2	2	23:00:00	0	06:30:00	6.5	3	0	0	0	0	0	0	1	0	0	0	0	0	0	0	No	2	0	0	1	0	1	0	0	0	0	0
1	470	Jiangsu	1	1	2	16	158	65	26.0375	1	1	1		1			2	3	23:00:00	0	06:40:00	6.5	3	2	0	2	3	1	2	0	0	0	0	0	0	0	0	No	8	2	1	1	0	1	0	3	1	0	0
1	471	Shandong	2	1	2	20	164	52	19.3337	1	1	1		1			2	2	23:30:00	2	06:30:00	6.5	3	2	0	3	3	1	3	0	1	0	0	0	2	0	0	No	9	2	2	1	0	1	0	3	0	0	0
2	472	Jiangsu	1	1	2	16	168	98	34.7222	1	1	1		1			3	3	22:50:00	0	06:45:00	8.5	5	0	0	2	1	0	0	0	0	0	0	2	0	0	0	No	3	0	0	0	0	1	0	2	1	1	1
2	473	Jiangsu	1	1	1	20	176	68	21.9525	1	1	2	20	2	2	3	3	1	00:00:00	3	12:00:00	7.5	4	2	0	1	0	3	3	2	0	0	0	0	0	0	0	No	10	2	3	0	3	1	0	1	0	1	0
1	474	Jiangsu	1	1	2	19	165	64	23.5078	1	1	1		1			1	3	22:30:00	0	7:40	6.5	3	0	0	0	0	0	0	1	0	0	0	0	0	0	0	No	4	0	0	1	2	1	0	0	1	0	0
1	475	Jiangsu	1	1	2	17	160	42	16.4062	1	1	1		1			2	3	22:50:00	1	6:20	6.5	3	0	0	0	0	0	1	0	0	0	0	0	0	0	0	No	3	0	1	1	0	1	0	0	1	0	0
1	476	Shandong	2	1	1	20	178	95	29.9836	1	1	1		2	1	4	3	1	23:30:00	0	07:10:00	5.5	2	0	0	0	0	0	0	0	0	2	0	0	0	0	0	No	5	0	0	2	2	1	0	0	1	1	1
1	477	Jiangsu	1	1	2	16	162	58	22.1003	1	1	1		1			2	3	23:00:00	0	06:30:00	6.5	3	1	0	1	1	0	1	0	0	0	0	0	0	0	0	No	4	1	0	1	0	1	0	1	1	1	1
2	478	Shandong	2	1	2	21	168	60	21.2585	1	1	1		1			3	1	23:00:00	1	7:30	7.5	4	1	0	1	1	1	1	0	0	1	1	1	0	0	0	No	4	1	1	0	0	1	0	1	0	0	0
1	479	Jiangsu	1	1	2	19	162	52.5	20.0046	1	1	1		1			3	1	22:40:00	1	6:50	5.5	2	2	0	2	0	1	2	2	0	0	2	0	0	2	0	No	9	2	1	2	2	1	0	1	0	0	1
2	480	Jiangsu	1	1	2	16	156	46	18.902	1	1	1		1			2	3	22:30:00	0	6:20	7.5	4	1	0	1	1	0	0	0	0	0	0	0	0	0	0	No	2	1	0	0	0	0	0	1	1	0	0
1	481	Jiangsu	1	1	2	16	170	58	20.0692	1	1	1		1			3	3	23:00:00	0	6:20	6.5	3	1	0	1	0	0	0	0	1	0	0	0	0	0	0	No	4	1	0	1	0	1	0	1	0	1	0
1	482	Jiangsu	1	1	2	20	158	54	21.6311	1	1	1		2	1	1	1	3	23:00:00	3	7:40	6.5	3	2	0	2	1	3	2	1	1	1	0	0	2	0	1	the dormitory environment affects sleep	10	2	3	1	1	1	0	2	1	1	1
2	483	Jiangsu	1	1	1	17	176	51	16.4644	1	1	1		1			2	1	23:00:00	0	06:40:00	7.5	4	1	0	1	1	0	0	0	0	0	0	0	0	0	0	No	2	1	0	0	0	0	0	1	0	1	0
1	484	Shandong	2	1	2	18	165	50	18.3655	1	1	1		1			2	2	22:30:00	0	6:00	6.5	3	2	0	2	1	0	1	0	0	0	0	0	1	0	0	No	6	2	0	1	0	1	0	2	0	0	1
1	485	Jiangsu	1	1	2	17	180	70	21.6049	1	1	1		1			2	3	23:00:00	2	06:30:00	5.5	2	1	0	2	0	0	0	0	0	0	0	0	0	0	0	No	7	1	1	2	2	0	0	1	1	1	0
1	486	Jiangsu	1	1	2	16	160	57.5	22.4609	1	1	1		1			2	3	23:00:00	1	06:40:00	6.5	3	1	0	2	1	1	1	2	0	1	1	1	1	0	0	No	6	1	1	1	0	1	0	2	1	0	0
1	487	Jiangsu	1	1	2	17	162	50	19.052	1	1	1		1			2	3	23:00:00	1	06:30:00	6.5	3	1	0	1	0	1	0	0	0	0	0	0	0	0	0	No	4	1	1	1	0	0	0	1	1	0	0
2	488	Shandong	2	1	1	20	180	65	20.0617	1	1	1		1			2	1	23:30:00	1	08:00:00	8.5	5	0	3	0	0	1	0	0	3	0	0	1	0	0	0	No	5	0	1	0	0	1	3	0	1	0	0
1	489	Jiangsu	1	1	2	16	170	50	17.301	1	1	1		1			2	3	23:00:00	1	06:45:00	5.5	2	1	0	3	0	0	0	0	0	0	0	2	0	0	0	No	9	1	1	2	2	1	0	2	1	0	0
1	490	Jiangsu	1	1	2	16	158	52	20.83	1	1	1		1			1	3	23:40	3	06:40:00	6.5	3	1	0	2	1	1	1	0	0	0	0	0	0	0	0	No	7	1	2	1	0	1	0	2	1	0	0
1	491	Shandong	2	1	1	19	170	55	19.0311	1	1	1		2	1	1	2	1	23:00:00	2	06:30:00	6.5	3	1	0	0	2	2	1	0	0	0	1	0	0	0	0	No	6	1	2	1	0	1	0	1	1	0	0
1	492	Jiangsu	1	1	1	17	185	75	21.9138	1	1	1		1			1	3	01:00:00	0	6:50	6.5	3	0	0	1	1	0	0	0	0	0	0	0	0	0	0	No	2	0	0	1	0	0	0	1	1	1	0
1	493	Beijing	2	1	2	20	168	83	29.4076	1	1	1		2	1	1	1	2	00:00:00	2	07:00:00	6.5	3	2	0	1	1	3	1	0	0	3	3	0	0	0	0	No	8	2	3	1	0	1	0	1	1	1	1
1	494	Shandong	2	1	2	19	160	51	19.9219	1	1	1		1			1	2	00:30:00	0	06:30:00	5.5	2	1	0	3	1	1	1	0	0	1	0	3	0	0	0	No	7	1	1	2	0	1	0	2	1	1	1
1	495	Jiangsu	1	1	2	17	163	40	15.0551	1	1	1		1			2	3	22:40:00	0	6:20	6.5	3	1	0	1	0	0	0	1	0	0	0	0	0	0	0	No	4	1	0	1	0	1	0	1	0	0	0
2	496	Jiangsu	1	1	2	16	160	48	18.75	1	1	1		1			2	3	23:30:00	0	06:30:00	7.5	4	0	0	2	1	0	0	0	0	0	0	0	0	0	0	No	2	0	0	0	0	0	0	2	0	1	0
2	497	Jiangsu	1	1	1	17	175	60	19.5918	1	1	1		1			1	3	22:30:00	0	06:30:00	7.5	4	1	0	2	0	0	0	1	0	0	0	0	1	0	0	No	3	1	0	0	0	1	0	1	1	0	0
1	498	Jiangsu	1	1	2	18	160	50	19.5312	1	1	1		1			1	3	23:30:00	1	6:10	3	1	0	0	1	1	0	0	0	0	0	0	0	0	0	0	No	8	0	1	3	3	0	0	1	1	0	0
1	499	Jiangsu	1	1	1	16	175	62	20.2449	1	1	1		1			1	1	23:00:00	0	6:25	6.5	3	1	0	0	0	0	0	0	0	0	0	0	0	0	0	No	2	1	0	1	0	0	0	0	0	0	0
1	500	Shandong	2	1	2	19	160	61	23.8281	1	1	1		1			1	1	23:00:00	2	07:00:00	5.5	2	3	0	2	2	3	3	2	0	0	2	0	2	0	0	No	13	3	3	2	2	1	0	2	0	0	0
2	501	Jiangsu	1	1	1	17	175	55	17.9592	1	1	1		1			2	1	22:30:00	1	6:20	7.5	4	1	0	0	0	0	0	0	2	0	2	0	0	1	0	No	3	1	1	0	0	1	0	0	0	0	0
2	502	Jiangsu	2	1	1	16	172	60	20.2812	7	1	1		1			1	3	23:00:00	1	08:00:00	7.5	4	2	0	0	1	0	0	0	0	0	0	0	0	0	0	No	5	2	1	0	1	0	0	1	0	0	0
1	503	Jiangsu	1	1	2	16	158	92	36.8531	1	1	1		1			2	3	23:00:00	0	06:40:00	6.5	3	0	0	3	0	0	0	0	0	0	0	0	0	0	0	No	3	0	0	1	0	0	0	2	0	1	0
2	504	Jiangsu	1	1	2	16	163	55	20.7008	1	1	1		1			1	3	22:20:00	0	6:20	8.5	5	0	0	2	0	0	0	0	0	0	0	0	0	0	0	No	1	0	0	0	0	0	0	1	0	0	0
1	505	Jiangsu	1	1	2	17	167	47	16.8525	1	1	1		1			2	1	23:40	0	6:20	5.5	2	2	0	3	3	1	0	0	0	0	0	0	1	0	0	No	10	2	1	2	1	1	0	3	0	0	0
1	506	Jiangsu	1	1	2	16	163	63	23.7118	1	1	1		1			2	3	23:00:00	1	6:20	5.5	2	3	0	3	2	1	0	0	0	0	1	0	0	0	1	No	11	3	1	2	1	1	0	3	1	1	0
1	507	Jiangsu	1	1	1	16	176	67	21.6296	1	1	1		1			1	3	23:30:00	0	06:40:00	6.5	3	1	0	0	0	0	0	0	0	0	0	0	0	0	0	No	2	1	0	1	0	0	0	0	0	0	0
2	508	Jiangsu	1	1	2	16	159	45	17.7999	1	1	1		1			1	3	22:50:00	0	6:25	7.5	4	0	0	0	0	0	0	0	0	0	0	0	0	0	0	No	0	0	0	0	0	0	0	0	1	0	0
1	509	Jiangsu	1	1	1	16	163	45	16.937	1	1	1		1			1	1	22:00	0	7:30	3	1	0	0	0	0	0	0	0	0	0	0	0	0	0	0	No	6	0	0	3	3	0	0	0	0	0	0
1	510	Jiangsu	1	1	2	16	173	85	28.4005	1	1	1		1			2	1	23:30:00	0	06:30:00	5.5	2	0	0	0	0	0	0	0	0	0	0	0	0	0	0	No	3	0	0	2	1	0	0	0	0	1	0
1	511	Jiangsu	1	1	2	16	163	50	18.8189	1	1	1		1			1	3	23:00:00	0	6:10	6.5	3	1	0	2	0	0	2	1	0	0	1	1	1	0	0	No	4	1	0	1	0	1	0	1	0	0	0
1	512	Jiangsu	1	1	1	17	178	90	28.4055	1	1	1		1			2	3	23:30:00	0	6:00	6.5	3	1	0	3	2	0	0	0	0	0	0	0	0	0	0	No	5	1	0	1	0	0	0	3	0	1	0
1	513	Jiangsu	1	1	1	17	178	65	20.5151	1	1	1		1			3	3	00:00:00	3	6:20	4.5	1	3	0	3	3	3	3	3	1	0	0	3	3	0	0	No	16	3	3	3	2	2	0	3	0	1	0
1	514	Jiangsu	1	1	1	18	183	100	29.8606	1	1	1		1			2	3	23:30:00	0	07:00:00	6.5	3	1	0	3	1	0	0	0	0	3	0	0	0	0	0	No	5	1	0	1	0	1	0	2	1	1	1
1	515	Jiangsu	1	1	2	20	167	54	19.3625	1	1	1		1			3	2	22:30:00	1	6:50	6.5	3	2	2	3	3	2	2	0	0	0	0	2	2	0	0	No	12	2	2	1	1	1	2	3	0	0	1
1	516	Jiangsu	1	1	2	16	160	45	17.5781	1	1	1		1			2	3	22:30:00	0	06:40:00	6.5	3	0	0	0	1	1	0	0	0	0	3	0	0	0	0	No	5	0	1	1	1	1	0	1	0	0	0
2	517	Jiangsu	1	1	2	16	166	80	29.0318	1	1	1		1			3	3	22:30:00	1	06:30:00	7.5	4	2	0	2	1	0	1	1	0	0	2	2	0	0	0	No	6	2	1	0	0	1	0	2	1	0	0
1	518	Jiangsu	1	1	2	17	160	48	18.75	1	1	1		1			2	3	23:30:00	2	6:20	6.5	3	1	0	2	2	1	0	0	0	0	1	0	0	0	0	No	7	1	2	1	0	1	0	2	0	1	1
1	519	Jiangsu	1	1	1	16	177	71	22.6627	1	1	1		2	1	5	1	3	00:00:00	1	06:30:00	5.5	2	2	0	2	1	2	3	0	0	0	0	0	3	1	2	relationship issues	9	2	2	2	0	1	0	2	1	1	1
1	520	Jiangsu	1	1	2	17	158	54	21.6311	1	1	1		1			2	3	23:00:00	0	6:20	6.5	3	2	0	3	2	1	3	0	0	0	0	1	0	0	1	the dormitory environment affects sleep	8	2	1	1	0	1	0	3	0	0	1
1	521	Jiangsu	1	1	2	16	162	47	17.9089	1	1	1		1			3	3	23:00:00	0	06:30:00	6.5	3	1	0	0	1	2	0	0	0	0	0	0	1	0	0	No	5	1	1	1	0	1	0	1	1	0	0
1	522	Jiangsu	1	1	2	16	166	54	19.5965	1	1	1		1			1	3	23:30:00	0	06:30:00	3.5	1	0	0	0	0	0	0	0	0	0	0	3	0	0	0	No	7	0	0	3	3	1	0	0	1	1	0
1	523	Shandong	2	1	1	18	175	101	32.9796	1	1	1		1			3	1	23:30:00	1	6:00	6.5	3	2	0	2	1	0	1	0	0	2	0	0	0	0	0	No	7	2	1	1	0	1	0	2	0	1	1
1	524	Jiangsu	1	1	2	20	174	58	19.1571	1	1	1		1			3	3	22:30:00	1	6:00	5.5	2	2	0	2	1	0	1	0	0	2	0	2	0	0	0	No	10	2	1	2	2	1	0	2	0	0	0
2	525	Jiangsu	1	1	2	19	168	55	19.487	1	1	1		1			2	2	00:00:00	2	08:00:00	7.5	4	1	0	0	0	0	0	1	0	0	0	0	0	0	0	No	3	1	1	0	0	1	0	0	0	1	0
1	526	Jiangsu	1	1	2	17	165	61	22.4059	1	1	1		1			1	3	22:30:00	1	05:50:00	6.5	3	1	0	3	2	2	0	0	0	0	0	1	1	0	0	No	8	1	2	1	0	1	0	3	0	1	0
1	527	Jiangsu	1	1	2	16	161	44.5	17.1675	1	1	1		1			3	1	22:30:00	0	6:25	6.5	3	2	0	3	3	1	2	0	2	0	2	2	2	1	0	No	10	2	1	1	1	2	0	3	0	0	1
2	528	Jiangsu	1	1	2	17	169	60	21.0077	1	1	1		1			2	3	23:00:00	0	6:15	7.5	4	0	0	0	0	0	0	0	0	3	2	2	0	0	0	No	1	0	0	0	0	1	0	0	1	1	1
1	529	Jiangsu	1	1	1	20	186	102.5	29.6277	1	1	2	6	2	2	4	3	3	00:00:00	3	08:00:00	5.5	2	1	0	0	1	2	0	0	0	3	0	0	0	0	0	No	10	1	3	2	2	1	0	1	1	1	0
2	530	Jiangsu	1	1	2	16	167	50	17.9282	1	1	1		1			1	3	22:30:00	1	6:20	7.5	4	0	0	2	1	0	0	0	0	0	0	0	0	0	0	No	3	0	1	0	0	0	0	2	1	0	0
2	531	Jiangsu	1	1	2	18	161	72	27.7767	1	1	1		1			1	3	23:30:00	3	6:00	8.5	5	2	0	3	3	3	1	0	0	0	0	3	1	0	3	the dormitory environment affects sleep	9	2	3	0	0	1	0	3	1	1	1
1	532	Jiangsu	1	1	2	18	165	60	22.0386	1	1	1		1			2	3	22:30:00	3	05:50:00	5.5	2	2	0	3	0	2	1	0	0	0	0	0	0	0	3	the dormitory environment affects sleep	11	2	3	2	1	1	0	2	0	0	0
2	533	Shandong	2	1	2	19	162	57	21.7193	1	1	1		1			1	3	23:30:00	0	7:30	7.5	4	0	0	0	0	0	0	0	0	0	0	0	0	0	0	No	0	0	0	0	0	0	0	0	1	1	0
1	534	Jiangsu	1	1	2	16	165	54	19.8347	1	1	1		1			1	1	22:40:00	0	6:10	6.5	3	1	0	2	1	0	0	1	0	0	0	0	0	0	0	No	5	1	0	1	0	1	0	2	1	1	1
2	535	Jiangsu	1	1	2	16	160	52	20.3125	1	1	1		1			2	1	22:30:00	1	6:20	7.5	4	0	0	0	0	0	0	0	0	0	0	1	0	0	0	No	2	0	1	0	0	1	0	0	1	0	0
1	536	Shandong	2	1	2	21	163	50	18.8189	1	1	1		1			2	3	23:40	0	7:40	6.5	3	1	0	2	2	2	1	1	1	0	0	0	3	0	0	No	7	1	1	1	1	1	0	2	1	0	0
2	537	Jiangsu	1	1	1	17	180	55	16.9753	1	1	1		1			2	1	23:20:00	0	07:00:00	7.5	4	1	0	1	2	0	0	0	3	1	1	3	0	1	0	No	4	1	0	0	0	1	0	2	1	0	0
1	538	Jiangsu	1	1	2	17	156	60	24.6548	1	1	1		1			3	1	23:00:00	1	06:20:00	6.5	3	1	0	0	0	1	1	1	0	0	0	0	1	0	0	No	4	1	1	1	0	1	0	0	1	1	1
2	539	Jiangsu	1	1	2	17	162	62	23.6244	1	1	1		1			3	3	23:00:00	0	6:15	7.5	4	1	0	0	1	1	0	0	0	0	0	2	0	2	2	the dormitory environment affects sleep	4	1	1	0	0	1	0	1	0	0	0
2	540	Jiangsu	1	1	2	18	167	56	20.0796	1	1	1		1			1	3	22:30:00	0	6:15	7.5	4	1	0	1	0	0	0	0	0	0	0	0	0	0	0	No	2	1	0	0	0	0	0	1	0	0	0
1	541	Jiangsu	1	1	1	16	173	50	16.7062	1	1	1		1			1	3	23:00:00	0	6:50	6.5	3	2	0	0	0	0	0	0	0	0	0	0	0	0	0	No	4	2	0	1	1	0	0	0	0	0	0
1	542	Jiangsu	1	1	2	16	160	50	19.5312	1	1	1		1			1	3	22:30:00	0	6:00	6.5	3	0	0	0	0	0	0	0	0	0	0	0	0	0	0	No	1	0	0	1	0	0	0	0	1	0	0
1	543	Jiangsu	1	1	2	16	163	65	24.4646	1	1	1		1			1	3	23:00:00	0	6:00	6.5	3	1	0	2	0	0	0	0	0	0	0	0	1	0	0	No	4	1	0	1	0	1	0	1	1	0	1
1	544	Jiangsu	1	1	1	16	177	50	15.9597	1	1	1		1			2	3	22:30:00	0	06:30:00	6.5	3	0	0	0	0	0	0	0	0	0	0	0	0	0	0	No	2	0	0	1	1	0	0	0	0	0	1
1	545	Jiangsu	1	1	2	19	173	70	23.3887	1	1	1		1			2	3	22:00	1	6:50	3.5	1	2	0	2	1	2	3	1	0	0	0	1	3	0	0	No	13	2	2	3	3	1	0	2	1	0	0
1	546	Jiangsu	1	1	1	16	174	90	29.7265	1	1	1		1			1	3	22:30:00	1	06:30:00	6.5	3	1	0	0	0	0	0	0	1	0	0	0	0	0	0	No	5	1	1	1	1	1	0	0	1	0	1
1	547	Jiangsu	1	1	2	16	154	45	18.9745	1	1	1		1			4	3	22:40:00	0	06:30:00	6.5	3	0	0	1	1	0	0	0	0	0	0	0	1	0	0	No	4	0	0	1	1	1	0	1	0	0	1
1	548	Jiangsu	1	1	1	16	193	95	25.504	1	1	1		1			3	3	22:40:00	0	06:40:00	5.5	2	0	0	0	0	0	0	0	0	0	0	0	0	0	0	No	4	0	0	2	2	0	0	0	1	0	0
1	549	Jiangsu	1	1	2	16	170	80	27.6817	1	1	1		1			2	3	23:00:00	0	06:30:00	6.5	3	0	0	1	1	0	1	0	0	0	0	0	0	0	0	No	3	0	0	1	0	1	0	1	1	0	0
1	550	Jiangsu	3	1	2	17	166	70	25.4028	1	1	1		1			1	3	22:20:00	1	6:20	5.5	2	2	0	3	2	2	1	0	0	0	0	1	0	0	0	No	12	2	2	2	2	1	0	3	0	0	0
2	551	Jiangsu	1	1	2	16	165	67	24.6097	1	1	1		1			1	1	23:30:00	0	06:40:00	7.5	4	2	0	3	0	0	0	0	0	0	0	0	0	0	0	No	4	2	0	0	0	0	0	2	1	0	0
1	552	Jiangsu	1	1	2	16	150	46	20.4444	1	1	1		1			1	3	23:30:00	0	06:30:00	6.5	3	2	0	3	3	0	1	0	0	0	0	2	1	0	0	No	7	2	0	1	0	1	0	3	1	1	0
1	553	Jiangsu	1	1	2	16	158	55	22.0317	1	1	1		1			2	3	22:30:00	0	06:30:00	5.5	2	0	0	3	1	0	2	0	0	0	0	0	1	0	0	No	7	0	0	2	2	1	0	2	1	0	1
1	554	Jiangsu	1	1	2	16	166	57	20.6852	1	1	1		1			2	3	23:30:00	3	6:15	6.5	3	1	0	3	2	2	0	0	0	0	0	0	0	0	0	No	8	1	3	1	0	0	0	3	1	1	1
1	555	Jiangsu	1	1	2	17	163	52	19.5717	1	1	1		1			1	3	23:00:00	0	6:10	6.5	3	1	0	1	1	0	0	0	1	0	0	1	2	0	0	No	4	1	0	1	0	1	0	1	0	1	0
1	556	Jiangsu	1	1	2	16	166	50	18.1449	1	1	1		1			3	1	22:00	0	6:10	6.5	3	0	0	0	0	0	0	0	0	0	0	0	0	0	0	No	2	0	0	1	1	0	0	0	0	0	1
1	557	Jiangsu	1	1	2	19	168	69	24.4473	1	1	1		1			2	3	23:30:00	1	06:40:00	5.5	2	1	0	2	1	1	0	0	0	0	2	0	0	0	0	No	8	1	1	2	1	1	0	2	0	1	0
1	558	Jiangsu	1	1	2	16	165	49	17.9982	1	1	1		1			1	3	23:00:00	0	06:30:00	6.5	3	0	0	1	0	0	0	0	0	0	0	0	0	0	0	No	2	0	0	1	0	0	0	1	0	1	0
1	559	Jiangsu	2	1	2	16	164	50	18.5901	1	1	1		1			3	3	23:30:00	0	06:40:00	6.5	3	0	0	2	1	0	0	0	2	2	1	0	0	2	0	No	4	0	0	1	0	1	0	2	0	0	1
1	560	Jiangsu	1	1	2	18	163	52	19.5717	1	1	1		1			2	3	22:30:00	0	6:20	6.5	3	1	0	1	2	0	0	0	0	0	1	0	0	0	0	No	6	1	0	1	1	1	0	2	1	0	0
1	561	Jiangsu	1	1	2	17	160	53	20.7031	1	1	1		1			2	1	23:00:00	1	6:20	6.5	3	1	0	0	0	0	1	1	0	0	2	0	0	0	1	the dormitory environment affects sleep	4	1	1	1	0	1	0	0	0	1	0
1	562	Jiangsu	1	1	2	16	160	50	19.5312	1	1	1		1			2	3	23:00:00	0	6:50	6.5	3	1	0	0	1	0	1	0	0	0	0	0	0	0	0	No	5	1	0	1	1	1	0	1	1	0	0
2	563	Shandong	2	1	1	19	175	70	22.8571	1	1	1		2	1	1	3	3	00:00:00	0	7:30	7.5	4	0	0	0	0	0	0	0	0	0	0	0	0	0	0	No	0	0	0	0	0	0	0	0	1	0	0
1	564	Jiangsu	3	1	2	16	168	90	31.8878	1	1	1		1			1	3	23:00:00	1	06:30:00	6.5	3	2	0	3	3	2	0	1	0	0	0	1	2	0	0	No	9	2	2	1	0	1	0	3	1	0	0
1	565	Jiangsu	3	1	2	17	185	65	18.992	1	1	1		1			2	2	23:40	0	06:30:00	5.5	2	1	0	2	2	0	0	0	0	0	0	0	0	0	0	No	6	1	0	2	1	0	0	2	0	0	0
2	566	Jiangsu	1	1	2	16	168	49	17.3611	1	1	1		1			1	3	22:30:00	0	06:40:00	7.5	4	0	0	1	0	0	0	0	0	0	0	0	0	0	0	No	1	0	0	0	0	0	0	1	0	0	1
1	567	Jiangsu	1	1	2	18	180	60	18.5185	1	1	1		1			3	1	22:30:00	1	06:40:00	6.5	3	2	0	3	2	2	2	3	1	1	1	1	1	1	0	No	11	2	2	1	1	2	0	3	0	1	1
1	568	Shandong	2	1	2	19	158	55.5	22.232	1	1	1		1			2	3	23:30:00	0	6:20	6.5	3	2	0	3	3	0	3	3	0	2	2	0	0	2	0	No	8	2	0	1	0	2	0	3	1	0	0
2	569	Jiangsu	1	1	2	16	167	55	19.721	1	1	1		1			2	3	23:00:00	0	06:30:00	7.5	4	1	0	3	1	0	0	0	0	0	0	1	0	0	0	No	4	1	0	0	0	1	0	2	1	0	1
1	570	Jiangsu	1	1	2	17	163	65	24.4646	1	1	1		1			3	3	23:00:00	0	6:00	6.5	3	1	0	0	1	1	2	1	0	2	0	2	1	0	0	No	5	1	1	1	0	1	0	1	0	0	1
2	571	Shandong	2	1	2	18	172	58	19.6052	1	1	1		1			1	3	22:30:00	3	6:00	7.5	4	0	0	0	0	0	0	0	0	0	0	0	0	0	0	No	2	0	2	0	0	0	0	0	1	0	0
2	572	Jiangsu	1	1	2	16	165.5	60	21.9056	1	1	1		1			1	3	22:00	1	6:00	7.5	4	0	0	0	0	0	0	0	0	0	0	0	0	0	0	No	1	0	1	0	0	0	0	0	0	0	0
1	573	Jiangsu	1	1	1	16	167	81	29.0437	1	1	1		1			3	1	22:00	0	6:15	6.5	3	1	0	2	0	1	2	0	0	1	2	2	0	0	0	No	6	1	1	1	1	1	0	1	1	0	0
1	574	Jiangsu	1	1	2	16	167	53	19.0039	1	1	1		1			2	3	23:00:00	1	6:00	6.5	3	1	0	2	1	0	0	0	0	0	2	1	0	0	0	No	6	1	1	1	0	1	0	2	0	0	0
1	575	Shandong	2	1	2	21	160	78	30.4688	1	1	1		1			1	1	23:50:00	0	06:30:00	6.5	3	0	0	2	1	0	0	0	0	0	0	0	0	0	0	No	3	0	0	1	0	0	0	2	1	0	1
1	576	Jiangsu	1	1	2	16	170	60	20.7612	1	1	1		1			2	3	00:30:00	0	06:30:00	5.5	2	1	0	3	1	0	0	0	0	0	0	0	0	0	0	No	5	1	0	2	0	0	0	2	1	1	0
1	577	Jiangsu	1	1	2	16	166	55	19.9594	1	1	1		1			3	2	23:30:00	1	06:30:00	6.5	3	2	0	1	1	0	0	0	0	1	0	1	0	0	0	No	6	2	1	1	0	1	0	1	1	0	0
1	578	Jiangsu	1	1	1	17	170	81	28.0277	1	1	1		2	1	1	3	1	23:30:00	0	06:30:00	5.5	2	2	0	2	1	1	0	0	2	0	0	0	0	0	0	No	9	2	1	2	1	1	0	2	1	0	1
1	579	Jiangsu	1	1	2	16	165	77.5	28.4665	1	1	1		1			3	3	23:00:00	0	06:30:00	6.5	3	0	0	3	1	0	0	0	0	0	1	1	0	0	0	No	4	0	0	1	0	1	0	2	1	1	0
1	580	Jiangsu	1	1	2	16	170	65	22.4913	1	1	1		1			3	3	22:30:00	0	06:40:00	6.5	3	1	0	0	1	0	0	0	0	0	0	0	1	0	0	No	5	1	0	1	1	1	0	1	1	0	0
2	581	Jiangsu	1	1	2	16	163	54	20.3244	1	1	1		1			3	1	23:00:00	0	6:50	7.5	4	1	0	3	1	0	0	0	0	0	0	0	0	0	0	No	3	1	0	0	0	0	0	2	1	1	0
2	582	Jiangsu	1	1	2	16	163	46	17.3134	1	1	1		1			1	2	22:30:00	1	6:25	7.5	4	2	0	3	2	1	0	0	0	0	0	2	0	0	0	No	7	2	1	0	0	1	0	3	0	0	0
1	583	Jiangsu	1	1	2	16	172	52.5	17.7461	1	1	1		1			2	3	23:30:00	3	06:30:00	6.5	3	1	0	3	2	3	3	1	3	0	1	0	0	0	0	No	9	1	3	1	0	1	0	3	1	0	0
2	584	Jiangsu	1	1	2	16	156	82	33.6949	1	1	1		1			2	3	22:30:00	0	6:20	8.5	5	1	0	1	1	0	1	1	0	0	1	1	1	1	0	No	3	1	0	0	0	1	0	1	1	0	0
1	585	Jiangsu	1	1	2	17	163	60	22.5827	1	1	1		1			2	1	23:00:00	1	6:25	6.5	3	1	0	0	1	1	1	0	1	1	1	0	0	0	0	No	5	1	1	1	0	1	0	1	0	1	0
2	586	Jiangsu	1	1	2	16	158	51	20.4294	1	1	1		1			2	1	23:40	3	06:40:00	7.5	4	1	0	2	1	0	0	0	0	0	0	0	0	0	0	No	5	1	2	0	0	0	0	2	1	0	0
1	587	Jiangsu	1	1	2	16	160	45	17.5781	1	2	1		1			3	1	22:40:00	3	06:30:00	6.5	3	1	0	1	0	2	2	0	0	0	1	2	1	1	1	No	8	1	3	1	1	1	0	1	1	1	1
1	588	Jiangsu	1	1	2	16	163	57	21.4536	1	1	1		1			3	3	23:30:00	0	7:40	6.5	3	1	0	1	0	0	0	2	0	0	0	0	0	0	0	No	5	1	0	1	1	1	0	1	1	1	1
1	589	Jiangsu	1	1	2	16	166	59	21.4109	1	1	1		1			3	1	22:30:00	0	6:20	6.5	3	1	0	3	1	1	0	0	0	1	0	3	0	2	0	No	7	1	1	1	1	1	0	2	0	0	0
2	590	Jiangsu	1	1	2	16	166	96	34.8381	1	1	1		1			1	2	22:30:00	0	06:40:00	7.5	4	1	0	0	0	0	0	0	0	0	0	0	0	0	0	No	1	1	0	0	0	0	0	0	0	1	0
2	591	Jiangsu	1	1	2	16	165	50	18.3655	1	1	1		1			1	3	00:00:00	0	06:30:00	7.5	4	2	0	2	1	0	2	1	0	1	1	1	1	0	0	No	5	2	0	0	0	1	0	2	1	1	0
1	592	Jiangsu	1	1	2	16	175	50	16.3265	1	1	1		1			3	3	22:30:00	0	06:30:00	3	1	0	0	0	0	0	0	0	0	0	0	0	0	0	0	No	6	0	0	3	3	0	0	0	1	0	0
1	593	Shandong	2	1	2	19	170	69	23.8754	1	1	1		1			2	1	22:50:00	0	6:00	6.5	3	0	0	3	3	0	1	0	0	0	0	0	1	0	0	No	5	0	0	1	0	1	0	3	1	0	0
1	594	Jiangsu	1	1	2	17	198	60	15.3046	1	1	1		1			3	3	22:00	1	06:30:00	4.5	1	1	0	1	0	0	0	0	0	1	0	0	0	0	0	No	10	1	1	3	3	1	0	1	0	0	1
1	595	Jiangsu	1	1	2	17	163	53	19.9481	1	1	1		1			2	3	23:00:00	0	06:30:00	5.5	2	2	0	2	1	0	0	0	0	1	0	2	0	0	0	No	9	2	0	2	2	1	0	2	0	1	0
1	596	Jiangsu	1	1	2	17	169	80	28.0102	1	1	1		1			2	3	22:00	1	6:20	6.5	3	1	0	3	1	0	0	0	0	3	2	3	2	2	0	No	8	1	1	1	1	2	0	2	0	1	0
1	597	Jiangsu	1	2	2	16	172	61	20.6193	1	1	1		1			1	1	23:00:00	0	06:30:00	6.5	3	0	0	0	1	0	0	0	0	0	0	0	0	0	0	No	2	0	0	1	0	0	0	1	0	0	0
1	598	Jiangsu	1	1	2	19	163	60	22.5827	1	1	1		1			1	1	23:00:00	1	6:05	6.5	3	1	0	2	1	1	3	2	0	0	0	0	0	0	0	No	6	1	1	1	0	1	0	2	1	0	0
2	599	Heilongjiang	3	2	2	24	166	60	21.7738	1	1	1		1			2	3	23:00:00	1	06:45:00	7.5	4	1	0	0	1	1	0	0	0	0	0	1	1	0	2	the dormitory environment affects sleep	4	1	1	0	0	1	0	1	1	0	0
2	600	Jiangsu	1	1	2	16	163	50	18.8189	1	1	1		1			3	1	22:30:00	0	6:20	8.5	5	0	0	1	0	0	0	0	0	0	0	0	0	0	0	No	1	0	0	0	0	0	0	1	0	0	0
1	601	Jiangsu	1	1	2	16	163	60	22.5827	1	1	1		1			2	1	23:30:00	2	06:40:00	6.5	3	2	0	3	2	3	0	1	1	3	0	0	1	1	0	No	10	2	3	1	0	1	0	3	1	1	0
2	602	Jiangsu	1	2	2	17	161	60	23.1473	1	1	1		1			1	3	23:00:00	0	6:15	7.5	4	1	0	1	1	0	0	0	0	0	0	0	0	0	0	No	2	1	0	0	0	0	0	1	1	0	1
2	603	Jiangsu	1	1	2	17	158	45	18.026	1	1	1		1			2	3	22:35	0	6:10	7.5	4	1	0	1	1	0	1	1	1	1	1	1	1	1	1	staying up late to work or study	3	1	0	0	0	1	0	1	0	0	0
1	604	Jiangsu	1	1	2	17	165	53	19.4674	1	1	1		1			2	2	23:30:00	3	6:10	4.5	1	3	0	3	3	3	0	0	0	0	0	0	0	0	0	No	14	3	3	3	2	0	0	3	0	0	1
1	605	Jiangsu	1	1	2	16	167	52	18.6453	1	1	1		2	2	1	3	3	23:30:00	1	06:30:00	5.5	2	1	0	1	1	0	0	0	0	0	0	0	0	0	0	No	6	1	1	2	1	0	0	1	0	0	1
1	606	Jiangsu	1	1	2	16	160	55	21.4844	1	1	1		1			2	3	22:30:00	0	06:30:00	6.5	3	0	0	0	0	0	0	0	0	0	0	0	0	0	0	No	2	0	0	1	1	0	0	0	1	0	0
2	607	Jiangsu	1	1	2	17	157	45	18.2563	1	1	1		1			2	2	23:00:00	1	06:30:00	7.5	4	1	0	3	3	2	0	1	3	3	3	2	0	0	3	mood problems	8	1	2	0	0	2	0	3	1	0	0
1	608	Jiangsu	1	1	2	16	160	80	31.25	1	1	1		1			1	1	23:30:00	3	06:30:00	4.5	1	2	0	3	3	3	3	1	2	3	3	0	3	2	0	No	16	2	3	3	3	2	0	3	0	0	0
1	609	Jiangsu	1	1	2	17	158	66	26.4381	1	1	1		1			1	3	23:00:00	0	06:40:00	6.5	3	0	0	0	0	0	0	0	0	0	0	0	0	0	0	No	1	0	0	1	0	0	0	0	0	1	0
1	610	Jiangsu	1	1	2	20	162	46	17.5278	1	1	1		1			4	3	22:30:00	0	06:30:00	6.5	3	0	0	0	0	0	0	0	0	0	0	0	0	0	0	No	2	0	0	1	1	0	0	0	0	0	1
2	611	Jiangsu	1	1	2	16	172	50	16.901	1	1	1		1			1	3	23:20:00	0	06:40:00	7.5	4	1	0	1	1	0	1	1	0	0	0	0	0	0	0	No	3	1	0	0	0	1	0	1	1	0	0
1	612	Jiangsu	1	1	2	16	172	80	27.0416	1	1	1		1			1	3	22:50:00	0	06:40:00	6.5	3	0	0	0	0	0	0	0	0	0	0	0	0	0	0	No	2	0	0	1	1	0	0	0	1	0	0
1	613	Jiangsu	1	1	2	16	165	70	25.7117	1	1	1		1			2	3	23:00:00	1	6:00	5.5	2	2	0	1	0	1	0	0	0	0	0	0	1	1	0	No	8	2	1	2	1	1	0	1	1	0	0
1	614	Jiangsu	1	1	2	16	158	70	28.0404	1	1	1		1			2	2	22:30:00	0	6:20	6.5	3	1	0	1	0	0	0	0	0	0	0	0	0	0	0	No	4	1	0	1	1	0	0	1	0	0	0
1	615	Jiangsu	1	1	2	17	171	53	18.1252	1	1	1		1			3	3	23:00:00	1	06:40:00	6.5	3	1	0	2	1	0	0	0	2	0	0	0	0	0	0	No	6	1	1	1	0	1	0	2	1	0	1
1	616	Jiangsu	1	2	1	17	170	55	19.0311	1	1	1		1			3	3	23:00:00	2	06:40:00	6.5	3	2	0	2	1	1	0	0	0	0	0	0	0	0	0	No	7	2	2	1	0	0	0	2	0	0	1
2	617	Jiangsu	1	1	2	16	159	48	18.9866	1	1	1		1			2	3	22:30:00	0	06:20:00	7.5	4	0	0	2	0	0	0	0	0	0	0	0	0	0	0	No	1	0	0	0	0	0	0	1	0	0	0
1	618	Shandong	2	1	2	19	165	52	19.1001	1	1	1		1			1	3	23:00:00	1	06:30:00	6.5	3	1	0	0	0	0	2	2	0	0	3	0	1	0	0	No	4	1	1	1	0	1	0	0	0	0	1
1	619	Shandong	2	1	2	19	170	49	16.955	1	1	1		1			2	3	23:00:00	3	06:30:00	5.5	2	2	0	3	3	3	0	0	0	0	0	3	3	0	0	No	13	2	3	2	2	1	0	3	1	0	0
1	620	Jiangsu	1	1	2	16	162	55	20.9572	1	1	1		1			1	3	22:30:00	0	06:30:00	6.5	3	1	0	3	1	0	0	1	0	0	0	0	0	0	0	No	6	1	0	1	1	1	0	2	1	0	0
1	621	Jiangsu	1	1	2	16	163	60	22.5827	1	1	1		1			3	3	22:45	0	06:30:00	6.5	3	1	0	3	0	0	0	0	0	0	0	0	0	0	0	No	5	1	0	1	1	0	0	2	0	0	0
1	622	Jiangsu	1	1	2	16	156	43	17.6693	1	1	1		1			3	1	22:30:00	0	06:40:00	6.5	3	1	0	0	0	0	0	0	0	0	0	0	0	0	0	No	3	1	0	1	1	0	0	0	1	0	0
1	623	Jiangsu	1	1	2	16	163	60	22.5827	1	1	1		1			3	1	23:30:00	0	06:40:00	6.5	3	0	0	0	0	0	0	0	0	0	0	0	0	0	0	No	1	0	0	1	0	0	0	0	0	0	0
1	624	Jiangsu	1	1	2	16	174	57	18.8268	1	1	1		1			1	1	23:10:00	2	6:20	6.5	3	2	0	3	2	3	3	0	1	0	2	1	0	0	1	mood problems	10	2	3	1	0	1	0	3	1	1	0
1	625	Jiangsu	1	1	1	16	174	59	19.4874	1	1	1		1			2	3	23:30:00	0	06:40:00	6.5	3	1	0	1	0	0	0	0	0	0	0	0	0	0	0	No	3	1	0	1	0	0	0	1	1	0	0
1	626	Jiangsu	1	1	1	16	169	81	28.3604	1	1	1		1			3	3	23:30:00	0	06:40:00	6.5	3	2	0	3	2	0	0	0	0	3	0	0	2	1	0	No	7	2	0	1	0	1	0	3	1	0	0
2	627	Jiangsu	1	1	2	16	165	53	19.4674	1	1	1		1			1	3	22:00	0	06:30:00	7.5	4	1	0	1	1	0	2	0	0	0	0	0	0	0	0	No	3	1	0	0	0	1	0	1	0	1	0
1	628	Shandong	2	1	2	20	155	40	16.6493	1	1	1		1			3	3	23:50:00	1	7:50	6.5	3	1	0	1	2	2	1	0	0	0	1	0	1	0	1	No	8	1	2	1	1	1	0	2	1	1	1
1	629	Jiangsu	1	1	2	16	165	60	22.0386	1	1	1		1			4	1	23:00:00	0	06:45:00	6.5	3	1	0	1	1	0	1	0	1	0	0	0	0	0	0	No	5	1	0	1	1	1	0	1	1	1	0
1	630	Jiangsu	1	1	2	16	165	52	19.1001	1	1	1		1			1	3	22:45	0	06:30:00	5.5	2	1	0	0	0	0	0	1	0	1	0	0	0	0	0	No	6	1	0	2	2	1	0	0	1	0	0
2	631	Jiangsu	1	1	2	17	165	52	19.1001	1	1	1		1			2	3	23:00:00	3	06:30:00	7.5	4	1	0	0	0	0	0	1	0	0	0	0	0	0	0	No	4	1	2	0	0	1	0	0	0	0	0
2	632	Shandong	2	1	2	20	163	51	19.1953	1	1	1		1			2	3	23:30:00	0	08:00:00	8.5	5	1	0	3	1	1	1	0	0	0	0	0	0	0	0	No	5	1	1	0	0	1	0	2	1	0	0
1	633	Jiangsu	1	1	1	18	173	60	20.0474	1	1	1		2	2	1	1	3	23:30:00	1	06:30:00	6.5	3	2	0	2	1	1	2	0	0	0	0	0	0	0	0	No	7	2	1	1	0	1	0	2	0	0	1
1	634	Jiangsu	1	1	1	18	175	50	16.3265	1	1	1		1			4	2	22:30:00	0	06:30:00	6.5	3	1	0	3	1	1	1	0	0	0	0	0	0	0	0	No	7	1	1	1	1	1	0	2	1	1	1
1	635	Jiangsu	1	1	2	16	170	50	17.301	1	1	1		1			2	1	23:30:00	2	6:15	5.5	2	2	0	3	1	2	3	1	2	2	3	0	1	1	0	No	11	2	2	2	1	2	0	2	0	1	0
2	636	Jiangsu	1	2	2	18	165	48	17.6309	1	1	1		1			2	3	23:00:00	2	06:40:00	7.5	4	1	0	1	1	1	0	0	0	0	0	0	0	0	0	No	4	1	2	0	0	0	0	1	1	0	1
1	637	Jiangsu	1	1	2	16	160	80	31.25	1	1	1		1			3	3	22:30:00	0	06:30:00	6.5	3	0	0	0	0	0	0	0	0	0	0	0	0	0	0	No	2	0	0	1	1	0	0	0	0	0	1
1	638	Jiangsu	1	1	2	16	163	42	15.8079	1	1	1		1			2	1	23:00:00	0	06:30:00	6.5	3	1	0	0	0	0	0	0	0	0	0	0	0	0	0	No	2	1	0	1	0	0	0	0	0	0	1
1	639	Jiangsu	1	1	1	18	179	63	19.6623	1	1	2	20	2	2	2	3	3	00:00:00	0	07:00:00	5.5	2	2	0	2	1	0	0	0	0	0	0	0	0	0	0	No	7	2	0	2	1	0	0	2	0	1	0
1	640	Shandong	2	1	1	21	174	64	21.1389	1	1	1		1			1	3	00:30:00	1	07:00:00	6.5	3	1	0	3	1	0	0	0	0	0	0	0	0	0	0	No	5	1	1	1	0	0	0	2	1	1	1
1	641	Jiangsu	1	1	1	16	180	100	30.8642	1	1	1		1			2	3	23:00:00	0	06:30:00	6.5	3	1	0	0	0	0	0	0	0	0	0	0	0	0	0	No	2	1	0	1	0	0	0	0	0	0	0
1	642	Jiangsu	1	1	2	18	165	64	23.5078	1	1	1		1			2	3	00:00:00	3	6:10	5.5	2	3	0	2	1	3	2	2	2	1	2	2	1	0	0	No	12	3	3	2	0	2	0	2	0	1	0
1	643	Shandong	2	1	1	19	181	76.5	23.3509	1	1	1		1			2	1	00:00:00	1	07:00:00	5.5	2	1	0	0	2	0	0	0	0	2	0	0	0	0	0	No	7	1	1	2	1	1	0	1	1	1	0
1	644	Jiangsu	1	1	2	19	161	52	20.061	1	1	1		1			2	1	00:00:00	2	07:10:00	4.5	1	2	0	2	2	1	0	0	0	0	0	3	0	0	0	No	13	2	2	3	3	1	0	2	1	1	0
1	645	Jiangsu	1	1	2	16	160	53	20.7031	1	1	1		1			2	2	23:00:00	1	6:25	5.5	2	2	0	3	3	2	0	1	0	0	0	0	0	1	2	repeated thoughts in bed	12	2	2	2	2	1	0	3	0	1	0
1	646	Shandong	2	1	1	18	174	52	17.1753	6	1	1		1			1	3	00:00:00	0	6:20	5.5	2	3	0	3	3	0	0	0	3	0	2	0	2	0	0	No	9	3	0	2	0	1	0	3	1	0	1
2	647	Shandong	2	1	1	19	176	60	19.3698	1	1	1		1			2	3	22:30:00	1	07:00:00	7.5	4	0	0	0	0	0	0	0	0	0	0	0	0	0	0	No	1	0	1	0	0	0	0	0	0	0	1
1	648	Jiangsu	1	1	2	16	160	98	38.2812	1	2	1		1			2	3	23:00:00	0	06:40:00	5.5	2	2	0	2	1	1	1	0	2	0	3	2	0	3	0	No	11	2	1	2	2	2	0	2	1	0	0
1	649	Jiangsu	1	1	2	17	163	53	19.9481	1	1	1		1			3	3	22:00	1	06:30:00	5.5	2	2	0	0	0	0	0	0	0	0	0	0	0	0	0	No	7	2	1	2	2	0	0	0	0	1	0
1	650	Jiangsu	1	1	2	16	170	52	17.9931	1	1	1		1			2	3	22:30:00	0	06:30:00	6.5	3	1	0	1	0	0	0	0	0	0	0	0	0	0	0	No	4	1	0	1	1	0	0	1	0	0	0
2	651	Jiangsu	1	1	2	16	172	53	17.9151	1	1	1		1			3	3	22:00	0	6:20	7.5	4	1	0	2	3	1	1	0	1	1	1	3	0	0	0	No	6	1	1	0	0	1	0	3	1	0	0
2	652	Jiangsu	1	1	2	17	158	66	26.4381	1	1	1		1			2	3	23:30:00	1	6:10	7.5	4	1	0	0	0	0	0	0	0	0	0	0	0	0	0	No	2	1	1	0	0	0	0	0	0	1	0
1	653	Jiangsu	1	1	2	16	170	52	17.9931	1	1	1		1			2	3	22:30:00	0	06:10:00	3.5	1	1	0	0	0	0	0	0	0	0	0	0	0	0	0	No	7	1	0	3	3	0	0	0	0	0	0
1	654	Jiangsu	1	1	1	17	168	66	23.3844	1	1	1		2	2	5	2	3	22:50:00	1	6:50	6.5	3	2	0	3	2	1	2	0	1	0	2	1	3	2	3	the dormitory environment affects sleep	10	2	1	1	1	2	0	3	1	0	0
1	655	Shandong	2	1	2	20	165	60	22.0386	1	1	1		1			2	3	23:00:00	0	06:30:00	6.5	3	1	0	2	1	0	0	0	0	0	0	0	0	0	0	No	4	1	0	1	0	0	0	2	0	0	0
1	656	Jiangsu	1	2	2	16	158	55	22.0317	1	1	1		1			2	3	22:30:00	1	07:30:00	5.5	2	0	0	2	1	0	1	0	0	0	0	0	2	0	0	No	9	0	1	2	3	1	0	2	1	0	1
1	657	Shandong	2	1	1	19	174	75	24.7721	1	1	1		1			2	1	23:10	0	6:20	6.5	3	0	0	0	1	0	0	0	0	0	0	0	0	0	0	No	2	0	0	1	0	0	0	1	1	0	0
2	658	Shandong	2	1	1	19	173	57	19.0451	1	1	1		1			2	2	23:30:00	0	07:00:00	7.5	4	2	0	2	1	0	0	0	0	3	2	0	0	0	0	No	5	2	0	0	0	1	0	2	0	1	0
2	659	Shandong	2	1	2	21	163	62	23.3355	1	1	1		2	1	1	2	3	23:00:00	0	07:00:00	7.5	4	1	0	0	0	0	0	0	0	0	0	0	1	1	0	No	2	1	0	0	0	1	0	0	1	0	1
2	660	Jiangsu	1	1	2	16	170	55	19.0311	1	1	1		1			2	3	23:00:00	1	6:10	7.5	4	2	0	3	1	2	2	0	0	0	0	3	1	0	2	No	7	2	2	0	0	1	0	2	0	0	0
1	661	Jiangsu	1	1	2	16	162	50	19.052	1	1	1		1			3	3	00:30:00	2	06:40:00	6.5	3	1	0	3	2	1	1	0	0	0	1	0	0	0	1	No	8	1	2	1	0	1	0	3	0	1	0
1	662	Shandong	2	1	2	19	163	45	16.937	1	2	1		1			4	1	23:00:00	0	6:20	6.5	3	0	0	0	0	0	0	0	0	0	0	0	0	0	0	No	1	0	0	1	0	0	0	0	1	1	0
1	663	Shandong	2	1	2	19	158	43	17.2248	1	1	1		1			2	3	23:00:00	2	6:50	6.5	3	2	0	2	2	2	1	1	0	0	0	2	3	0	0	No	9	2	2	1	1	1	0	2	1	1	0
2	664	Jiangsu	1	1	2	16	164	54	20.0773	1	1	1		1			2	1	22:30:00	0	06:30:00	7.5	4	1	0	3	0	1	1	0	0	0	0	0	0	0	0	No	5	1	1	0	0	1	0	2	0	0	0
2	665	Jiangsu	1	1	2	16	160	53	20.7031	1	1	1		1			1	2	22:30:00	0	6:20	7.5	4	0	0	3	0	0	0	0	0	0	0	0	0	0	0	No	2	0	0	0	0	0	0	2	0	0	0
2	666	Jiangsu	1	1	2	16	168	53	18.7783	3	1	1		1			2	3	23:00:00	0	6:20	7.5	4	0	0	3	1	0	0	0	0	0	0	0	0	0	3	No	3	0	0	0	0	1	0	2	0	0	0
2	667	Jiangsu	1	1	2	16	160	98	38.2812	1	1	1		1			1	3	22:00	0	6:50	7.5	4	0	0	0	0	0	0	0	0	0	0	0	0	0	0	No	0	0	0	0	0	0	0	0	1	0	0
1	668	Jiangsu	1	1	1	17	178	75	23.6713	1	1	1		1			3	3	22:30:00	0	7:30	3	1	0	0	0	0	0	0	0	0	0	0	0	0	0	0	No	6	0	0	3	3	0	0	0	1	0	1
1	669	Jiangsu	1	1	2	18	170	59	20.4152	1	1	1		1			2	3	23:00:00	1	06:30:00	6.5	3	3	0	2	2	1	2	1	1	0	0	2	0	3	2	the dormitory environment affects sleep	9	3	1	1	0	2	0	2	0	0	0
1	670	Jiangsu	1	1	2	17	170	58	20.0692	1	1	1		1			1	3	23:30:00	1	06:30:00	6.5	3	1	0	3	1	2	2	2	0	0	1	2	0	2	0	No	7	1	2	1	0	1	0	2	1	1	0
1	671	Jiangsu	1	1	2	18	160	48	18.75	1	1	1		1			1	3	22:30:00	3	06:30:00	6.5	3	0	0	3	1	1	0	0	0	0	0	0	0	0	0	No	6	0	2	1	1	0	0	2	1	1	0
1	672	Jiangsu	1	1	2	17	172	59	19.9432	1	1	1		1			4	3	23:30:00	0	6:20	5.5	2	2	0	3	3	0	0	1	1	1	1	2	0	3	0	No	9	2	0	2	1	1	0	3	0	0	1
1	673	Jiangsu	1	1	2	17	170	50	17.301	1	1	1		1			3	1	00:00:00	3	06:40:00	5.5	2	2	0	1	1	2	1	2	0	1	2	1	1	1	3	the dormitory environment affects sleep	11	2	3	2	1	2	0	1	1	1	1
1	674	Shandong	2	1	2	20	158	47.5	19.0274	1	1	1		1			2	3	23:30:00	1	7:30	5.5	2	1	0	1	1	2	0	0	0	0	0	0	0	0	0	No	8	1	2	2	2	0	0	1	1	0	0
2	675	Jiangsu	1	1	2	16	162	70	26.6728	1	1	1		1			3	1	23:00:00	0	6:20	7.5	4	1	0	1	1	1	1	1	1	1	1	1	1	1	1	the dormitory environment affects sleep	4	1	1	0	0	1	0	1	0	0	0
1	676	Shandong	2	1	1	18	177	83	26.493	1	1	1		1			2	3	22:30:00	0	6:20	6.5	3	1	0	3	1	0	0	0	0	0	0	0	0	0	0	No	5	1	0	1	1	0	0	2	0	0	0
1	677	Jiangsu	1	1	1	18	178	75	23.6713	1	1	1		1			1	1	22:30:00	0	6:00	5.5	2	2	0	3	3	2	3	0	0	0	3	0	3	0	0	No	11	2	1	2	2	1	0	3	1	0	1
1	678	Shandong	2	2	2	19	165	47	17.2635	1	1	1		1			3	3	23:30:00	1	06:40:00	6.5	3	1	0	1	1	1	1	0	0	0	1	1	1	1	0	No	5	1	1	1	0	1	0	1	1	0	0
1	679	Jiangsu	1	1	2	17	172	70	23.6614	1	1	1		1			1	3	23:00:00	1	06:30:00	5.5	2	2	0	2	1	2	3	3	0	3	3	3	3	2	3	the dormitory environment affects sleep	13	2	2	2	2	3	0	2	0	0	0
2	680	Jiangsu	1	1	2	16	172	53	17.9151	1	1	1		2	1	1	2	3	22:00	0	06:40:00	7.5	4	2	0	1	1	0	0	0	0	0	1	1	0	0	3	the dormitory environment affects sleep	4	2	0	0	0	1	0	1	1	0	0
1	681	Shandong	2	1	2	18	162	60	22.8624	1	1	1		2	1	1	4	2	23:00:00	0	05:50:00	5.5	2	1	0	3	2	0	2	2	0	0	1	0	2	3	0	No	9	1	0	2	1	2	0	3	1	0	1
1	682	Jiangsu	1	1	1	17	173	48	16.038	1	1	1		1			1	3	00:00:00	1	06:45:00	6.5	3	1	0	1	1	1	1	1	0	1	1	1	0	0	1	No	5	1	1	1	0	1	0	1	1	1	0
1	683	Jiangsu	1	1	2	18	160	65	25.3906	1	1	1		1			2	3	22:10:00	2	06:40:00	5.5	2	1	0	1	1	0	0	0	0	3	0	0	1	0	0	No	8	1	1	2	2	1	0	1	1	0	1
1	684	Jiangsu	1	1	2	16	171	60	20.5191	1	1	1		1			2	3	22:30:00	1	06:30:00	4.5	1	2	0	2	1	2	2	2	0	2	0	3	2	1	0	No	14	2	2	3	3	2	0	2	0	0	0
2	685	Shandong	2	2	1	20	173	68	22.7204	1	1	1		2	1	1	3	3	23:00:00	0	7:40	8.5	5	1	0	2	1	0	0	0	0	0	2	0	1	0	0	No	4	1	0	0	0	1	0	2	1	0	0
2	686	Jiangsu	1	1	1	17	196	85	22.1262	1	1	1		1			2	3	22:30:00	0	06:30:00	7.5	4	0	0	0	0	0	0	0	0	0	0	0	0	0	0	No	0	0	0	0	0	0	0	0	0	0	0
1	687	Jiangsu	1	2	2	16	161	57.5	22.1828	1	1	1		1			2	3	23:00:00	0	6:20	6.5	3	0	0	1	0	0	0	1	0	0	1	0	0	0	0	No	3	0	0	1	0	1	0	1	1	0	0
1	688	Jiangsu	1	1	2	16	165	65	23.8751	1	1	1		1			2	3	23:00:00	3	6:00	5.5	2	2	0	2	2	3	2	0	1	0	1	1	2	1	0	No	11	2	3	2	1	1	0	2	0	0	0
2	689	Jiangsu	1	1	2	17	165	70	25.7117	1	1	1		1			2	3	23:00:00	0	6:20	7.5	4	1	0	0	0	0	0	0	0	0	0	0	0	0	0	No	1	1	0	0	0	0	0	0	0	0	0
2	690	Shandong	2	2	2	18	171	52	17.7832	1	1	1		1			2	1	22:30:00	0	6:05	7.5	4	1	0	1	1	1	2	1	0	1	1	1	1	1	0	No	4	1	1	0	0	1	0	1	1	0	0
1	691	Jiangsu	1	1	2	17	164	48	17.8465	1	1	1		1			2	1	22:00	0	06:00:00	6.5	3	1	0	0	0	0	0	1	0	0	0	0	0	0	0	No	4	1	0	1	1	1	0	0	0	0	0
1	692	Jiangsu	1	1	2	16	173	50	16.7062	1	1	1		2	1	1	2	3	23:00:00	2	6:20	6.5	3	1	0	1	1	2	3	0	0	0	3	3	2	0	3	the dormitory environment affects sleep	7	1	2	1	0	2	0	1	0	0	0
1	693	Jiangsu	1	1	2	19	165	52.5	19.2837	1	1	1		1			3	3	23:00:00	2	6:20	6.5	3	2	0	3	3	3	3	1	1	2	0	3	1	2	3	No	11	2	3	1	0	2	0	3	0	0	0
1	694	Yunnan	2	1	2	19	170	67	23.1834	5	1	1		1			2	3	23:00:00	2	06:30:00	6.5	3	2	0	2	1	1	2	0	0	1	0	1	0	0	0	No	8	2	2	1	0	1	0	2	1	1	0
2	695	Jiangsu	1	1	1	19	180	80	24.6914	1	1	1		1			4	1	22:30:00	0	07:00:00	7.5	4	2	0	2	2	1	0	0	0	1	0	1	0	0	0	No	6	2	1	0	0	1	0	2	0	0	1
1	696	Jiangsu	1	1	2	19	168	60	21.2585	1	1	1		2	1	1	3	1	22:00	1	7:40	6.5	3	1	0	2	2	0	0	2	0	2	0	0	0	2	0	No	8	1	1	1	2	1	0	2	1	1	0
2	697	Jiangsu	1	2	2	16	155	42	17.4818	1	1	1		1			3	3	22:15:00	0	6:25	7.5	4	0	0	0	0	0	0	0	0	0	0	0	0	0	0	No	0	0	0	0	0	0	0	0	0	1	0
1	698	Jiangsu	1	2	2	18	160	53	20.7031	1	1	1		1			2	2	23:10:00	0	6:10	5.5	2	1	0	0	0	0	0	0	0	0	0	0	0	0	0	No	4	1	0	2	1	0	0	0	1	1	1
1	699	Jiangsu	1	1	2	17	166	65	23.5883	1	1	1		1			2	1	23:00:00	1	06:30:00	6.5	3	1	0	2	1	0	0	0	0	0	0	2	0	0	0	No	6	1	1	1	0	1	0	2	0	0	1
1	700	Jiangsu	1	2	2	18	172	60	20.2812	1	1	1		1			3	3	23:30:00	3	06:30:00	6.5	3	0	0	3	2	1	0	0	2	2	1	2	2	0	0	No	7	0	2	1	0	1	0	3	1	1	0
1	701	Jiangsu	1	1	2	19	165	54	19.8347	1	1	1		1			2	3	22:00	0	7:40	6.5	3	0	0	0	0	0	0	0	0	0	0	1	0	0	0	No	4	0	0	1	2	1	0	0	1	0	1
2	702	Jiangsu	1	1	1	17	175	85	27.7551	1	1	1		1			3	3	22:30:00	0	06:30:00	7.5	4	1	0	2	0	0	0	0	0	0	0	0	0	0	0	No	2	1	0	0	0	0	0	1	0	0	0
1	703	Jiangsu	1	2	1	17	175	50	16.3265	1	1	1		1			3	3	22:00	1	6:50	6.5	3	1	0	3	1	2	2	2	2	3	3	3	2	1	0	No	10	1	2	1	2	2	0	2	0	0	0
2	704	Shandong	2	2	2	19	163	70	26.3465	1	1	1		1			2	3	22:30:00	1	06:40:00	7.5	4	0	0	0	0	0	0	0	0	2	0	0	0	0	0	No	2	0	1	0	0	1	0	0	0	0	0
1	705	Shandong	2	2	1	19	179	55	17.1655	1	1	1		1			2	3	00:00:00	1	06:40:00	5.5	2	0	0	1	0	3	1	0	0	2	2	2	0	0	0	No	7	0	2	2	1	1	0	1	1	0	0
1	706	Jiangsu	1	2	2	17	168	98	34.7222	1	1	1		1			3	1	23:30:00	0	6:20	6.5	3	1	0	1	0	0	0	1	0	0	0	0	0	0	0	No	4	1	0	1	0	1	0	1	0	1	0
1	707	Jiangsu	1	2	1	16	178	65	20.5151	1	1	1		1			3	3	00:30:00	0	6:00	4.5	1	3	0	3	1	0	0	0	0	0	0	0	2	0	0	No	10	3	0	3	1	1	0	2	0	1	1
2	708	Jiangsu	1	2	2	16	165	55	20.202	1	1	1		1			3	2	23:00:00	0	7:20	7.5	4	0	0	3	0	0	0	0	0	0	0	0	0	1	0	No	3	0	0	0	0	1	0	2	1	0	0
1	709	Jiangsu	1	2	2	17	164.5	48	17.7382	1	1	1		1			4	3	22:30:00	3	06:30:00	6.5	3	0	0	0	0	0	0	0	0	0	0	0	0	0	0	No	4	0	2	1	1	0	0	0	0	0	0
1	710	Jiangsu	1	2	2	16	174	57	18.8268	1	1	1		1			2	2	23:20:00	1	6:10	6.5	3	1	0	3	3	1	3	3	0	0	1	0	1	0	1	No	7	1	1	1	0	1	0	3	1	1	0
1	711	Jiangsu	1	2	2	16	170	70	24.2215	1	1	1		1			2	3	00:00:00	0	06:30:00	5.5	2	2	0	3	1	0	0	0	0	0	0	0	0	0	0	No	6	2	0	2	0	0	0	2	0	0	0
1	712	Jiangsu	1	2	2	18	165	50	18.3655	1	1	1		1			1	1	23:30:00	0	6:00	5.5	2	0	0	1	1	0	0	0	0	0	0	0	0	1	0	No	4	0	0	2	0	1	0	1	0	1	0
1	713	Shandong	2	1	2	20	165	53	19.4674	1	1	1		2	1	1	1	3	23:30:00	2	08:00:00	6.5	3	2	0	2	1	3	2	0	0	0	0	0	0	0	2	the dormitory environment affects sleep	10	2	3	1	1	1	0	2	0	0	0
1	714	Shandong	2	2	1	21	181	85	25.9455	1	1	2	2	2	1	2	4	3	1:20	1	06:40:00	4.5	1	1	0	0	1	2	0	0	0	0	0	0	1	0	0	No	9	1	2	3	1	1	0	1	1	1	0
1	715	Jiangsu	1	2	2	17	165	50	18.3655	1	1	1		1			1	3	22:30:00	1	6:20	3	1	0	0	2	0	0	0	0	0	0	0	0	0	0	0	No	8	0	1	3	3	0	0	1	1	1	1
1	716	Jiangsu	1	1	2	16	167	60	21.5139	1	1	1		1			1	3	22:40:00	1	7:40	6.5	3	1	0	2	0	0	0	0	0	0	0	0	0	0	0	No	6	1	1	1	2	0	0	1	1	0	0
1	717	Jiangsu	1	1	2	16	165	50	18.3655	1	1	1		1			2	3	22:30:00	0	6:20	6.5	3	1	0	0	1	0	0	0	0	0	0	1	0	2	0	No	5	1	0	1	1	1	0	1	0	1	0
1	718	Jiangsu	1	2	2	16	163	65	24.4646	1	1	1		1			2	3	22:00	0	06:40:00	5.5	2	1	0	1	0	0	0	0	0	0	0	0	0	0	0	No	7	1	0	2	3	0	0	1	1	1	1
1	719	Sichuan	2	2	2	18	163	60	22.5827	1	1	1		1			3	3	23:30:00	1	07:00:00	6.5	3	1	0	3	1	0	1	2	0	0	0	0	0	0	0	No	6	1	1	1	0	1	0	2	0	1	0
1	720	Jiangsu	1	2	2	16	170	72	24.9135	1	1	1		1			1	1	22:30:00	0	06:30:00	6.5	3	1	0	1	0	0	0	0	0	0	0	0	0	0	0	No	4	1	0	1	1	0	0	1	0	1	0
1	721	Shandong	2	2	2	19	168	56	19.8413	1	1	1		1			3	3	23:30:00	1	06:40:00	6.5	3	1	0	1	1	2	2	0	0	0	0	0	0	1	1	staying up late to work or study	6	1	2	1	0	1	0	1	0	0	1
1	722	Shandong	2	2	2	18	170	56	19.3772	1	1	1		1			1	1	23:30:00	2	06:30:00	6.5	3	1	0	0	1	2	0	0	0	1	0	0	1	0	0	No	6	1	2	1	0	1	0	1	1	1	0
1	723	Jiangsu	1	2	1	16	180	65	20.0617	1	1	1		1			2	3	22:30:00	0	06:30:00	6.5	3	1	0	1	0	0	0	0	0	0	0	0	0	0	0	No	4	1	0	1	1	0	0	1	0	1	1
2	724	Beijing	2	2	1	21	166.5	71	25.6112	1	1	1		1			2	1	00:30:00	0	08:39:00	7.5	4	1	0	3	3	2	0	0	0	0	2	0	3	0	2	staying up late to work or study	6	1	1	0	0	1	0	3	1	1	1
1	725	Shandong	2	2	1	20	178	65	20.5151	1	1	2	5	2	2	2	3	3	23:00:00	0	6:50	6.5	3	0	0	0	0	0	0	0	0	0	0	0	0	0	0	No	2	0	0	1	1	0	0	0	0	0	1
1	726	Shandong	2	2	1	20	168	55	19.487	1	2	1		1			2	2	00:00:00	0	07:00:00	6.5	3	0	0	1	1	0	0	0	0	0	0	0	0	0	0	No	2	0	0	1	0	0	0	1	1	1	1
1	727	Sichuan	2	1	2	18	160	57	22.2656	1	1	1		1			3	3	23:00:00	1	07:15:00	6.5	3	0	0	2	0	0	0	0	0	0	0	0	0	0	0	No	4	0	1	1	1	0	0	1	1	1	0
2	728	Sichuan	2	2	1	18	177	63	20.1092	1	1	1		1			2	1	23:00:00	0	07:00:00	7.5	4	1	0	1	1	0	0	3	0	0	0	1	0	0	0	No	3	1	0	0	0	1	0	1	1	1	1
2	729	Sichuan	2	1	2	18	160	53	20.7031	1	1	1		1			2	1	23:40	0	07:00:00	7.5	4	1	0	1	1	0	0	0	0	0	0	0	0	0	0	No	2	1	0	0	0	0	0	1	1	0	0
1	730	Jiangsu	1	2	2	16	160	58	22.6562	1	1	1		1			4	3	22:30:00	1	06:30:00	5.5	2	3	0	2	1	2	2	1	1	0	0	1	1	0	3	the dormitory environment affects sleep	12	3	2	2	2	1	0	2	0	0	0
1	731	Jiangsu	1	1	2	16	161	50	19.2894	1	1	1		1			2	3	22:30:00	2	06:40:00	5.5	2	1	0	3	3	2	1	0	0	0	2	0	1	0	2	the dormitory environment affects sleep	11	1	2	2	2	1	0	3	0	0	0
2	732	Sichuan	2	2	1	18	182	69	20.8308	1	1	1		2	1	1	3	1	23:30:00	0	7:20	7.5	4	1	0	0	1	0	3	0	0	0	0	0	0	0	0	No	3	1	0	0	0	1	0	1	1	1	0
1	733	Jiangsu	1	2	2	16	167	45	16.1354	1	1	1		1			1	3	23:00:00	0	06:30:00	6.5	3	1	0	0	0	0	0	0	0	0	1	0	0	0	0	No	3	1	0	1	0	1	0	0	1	0	0
2	734	Jiangsu	1	2	2	16	166	47	17.0562	1	1	1		1			1	1	22:30:00	0	06:40:00	7.5	4	1	0	0	0	0	0	0	0	0	0	0	0	0	0	No	1	1	0	0	0	0	0	0	1	1	0
1	735	Jiangsu	1	2	2	19	165	57	20.9366	1	1	1		1			1	3	23:00:00	0	6:15	6.5	3	1	0	3	1	0	0	0	0	3	0	0	1	0	0	No	5	1	0	1	0	1	0	2	1	0	1
1	736	Jiangsu	1	2	2	17	160	47	18.3594	1	1	1		1			2	3	23:30:00	1	06:30:00	5.5	2	3	0	3	3	3	0	1	1	0	2	0	0	0	0	No	12	3	2	2	1	1	0	3	0	0	1
2	737	Jiangsu	1	2	2	17	165	60	22.0386	1	1	1		1			2	1	23:00:00	2	06:30:00	7.5	4	1	0	2	1	2	1	2	0	2	1	1	0	2	0	No	6	1	2	0	0	1	0	2	1	1	0
2	738	Sichuan	2	2	2	18	160	54	21.0938	1	1	1		1			2	1	01:00:00	0	11:00	7.5	4	0	0	3	3	0	0	0	0	0	0	1	0	0	0	No	5	0	0	0	1	1	0	3	1	1	0
2	739	Sichuan	2	2	2	19	160	48	18.75	1	1	1		1			1	3	00:30:00	0	08:30:00	8.5	5	1	0	1	1	0	0	0	0	0	0	0	0	0	0	No	2	1	0	0	0	0	0	1	1	1	0
2	740	Sichuan	2	2	2	18	170	48	16.609	5	1	1		2	1	1	3	3	23:40	0	07:15:00	7.5	4	0	0	2	1	0	0	0	0	1	0	0	0	0	0	No	3	0	0	0	0	1	0	2	1	1	1
2	741	Jiangsu	1	2	2	16	166	57.5	20.8666	1	1	1		1			2	3	23:00:00	0	06:40:00	7.5	4	1	0	0	1	0	0	0	0	0	1	1	0	0	0	No	3	1	0	0	0	1	0	1	0	0	0
1	742	Jiangsu	1	2	2	17	164	51	18.9619	1	1	1		1			2	3	23:30:00	1	06:40:00	5.5	2	2	0	0	1	2	2	2	0	3	0	0	0	0	0	No	9	2	2	2	1	1	0	1	1	0	1
1	743	Sichuan	2	2	1	18	185	67	19.5763	1	1	1		1			2	1	00:00:00	1	7:30	6.5	3	1	0	2	1	0	0	0	1	1	1	1	2	0	0	No	6	1	1	1	0	1	0	2	1	0	1
2	744	Sichuan	2	2	2	18	155	60	24.974	1	1	1		1			2	3	22:00	0	08:00:00	9.5	6	0	0	0	0	0	0	1	0	0	0	0	0	0	0	No	1	0	0	0	0	1	0	0	0	0	0
1	745	Jiangsu	1	2	2	16	160	50	19.5312	1	1	1		1			2	3	00:00:00	0	06:45:00	5.5	2	0	0	3	0	1	0	0	0	0	0	0	1	0	0	No	7	0	1	2	1	1	0	2	0	1	0
1	746	Jiangsu	1	2	2	17	158	65	26.0375	1	1	1		1			4	2	22:30:00	1	06:30:00	6.5	3	1	0	2	1	2	0	0	0	0	2	2	0	0	0	No	8	1	2	1	1	1	0	2	1	0	0
2	747	Sichuan	2	1	1	18	175	59	19.2653	1	1	1		1			2	1	23:30:00	0	08:30:00	7.5	4	1	0	0	1	0	0	0	0	0	0	2	0	1	0	No	4	1	0	0	1	1	0	1	1	0	0
1	748	Jiangsu	1	2	2	16	165	87	31.9559	1	1	1		1			3	3	23:30:00	1	06:30:00	5.5	2	1	0	1	1	2	2	0	0	0	0	2	0	0	0	No	8	1	2	2	1	1	0	1	1	1	0
1	749	Jiangsu	1	2	1	17	177	70	22.3435	1	1	1		1			3	3	05:30:00	0	05:34:00	3	1	0	0	0	0	0	0	0	0	0	0	0	0	0	0	No	3	0	0	3	0	0	0	0	1	1	1
2	750	Jiangsu	1	2	2	20	168	80	28.3447	1	1	1		1			3	3	23:58:00	0	06:30:00	7.5	4	1	0	1	1	0	0	0	0	0	0	0	0	0	0	No	2	1	0	0	0	0	0	1	1	1	1
1	751	Sichuan	2	2	2	18	158	50	20.0288	1	1	1		1			2	3	23:30:00	2	7:40	6.5	3	1	0	1	0	1	1	0	0	0	0	0	1	0	0	No	7	1	2	1	1	1	0	1	1	1	1
2	752	Jiangsu	1	2	2	18	162	43	16.3847	1	1	1		1			4	3	22:30:00	1	06:30:00	7.5	4	0	0	0	0	0	0	1	0	0	0	0	0	0	0	No	2	0	1	0	0	1	0	0	1	0	0
1	753	Sichuan	2	2	2	19	160	49	19.1406	1	1	1		1			4	3	23:50:00	0	08:00:00	6.5	3	0	0	0	0	0	0	0	0	0	0	0	1	0	0	No	3	0	0	1	1	1	0	0	1	0	0
1	754	Shandong	2	2	1	19	172	54	18.2531	1	1	1		1			3	3	00:00:00	0	06:45:00	5.5	2	0	0	2	0	0	0	0	0	0	0	0	0	0	0	No	4	0	0	2	1	0	0	1	1	0	1
2	755	Jiangsu	1	2	2	16	167	60	21.5139	1	1	1		1			2	1	23:00:00	2	06:45:00	7.5	4	1	0	2	1	2	0	1	1	0	1	2	0	0	0	No	6	1	2	0	0	1	0	2	0	0	0
1	756	Jiangsu	1	2	2	16	160	58	22.6562	1	1	1		1			3	1	22:30:00	1	06:30:00	5.5	2	3	0	1	1	3	2	1	0	0	0	1	1	0	3	the dormitory environment affects sleep	11	3	2	2	2	1	0	1	0	0	0
1	757	Sichuan	2	1	1	19	181	65	19.8407	1	1	1		2	1	1	2	3	22:30:00	0	07:00:00	6.5	3	1	0	1	1	1	1	0	0	0	1	1	0	0	0	No	6	1	1	1	1	1	0	1	1	0	1
1	758	Sichuan	2	2	2	18	173	65	21.7181	1	1	1		1			2	3	23:30:00	0	06:55:00	6.5	3	0	0	1	0	0	0	0	0	0	0	0	0	0	0	No	2	0	0	1	0	0	0	1	0	0	1
1	759	Sichuan	2	2	2	18	168	52	18.424	1	1	1		1			3	3	23:00:00	1	7:20	5.5	2	1	0	0	1	2	0	0	0	0	0	0	0	0	0	No	8	1	2	2	2	0	0	1	1	1	1
1	760	Sichuan	2	2	2	18	161	55	21.2183	1	1	1		1			1	3	22:30:00	0	06:30:00	6.5	3	1	0	1	1	0	0	0	0	0	0	0	0	0	0	No	4	1	0	1	1	0	0	1	1	0	1
1	761	Sichuan	2	2	2	18	165	47	17.2635	7	1	1		1			3	1	00:00:00	0	7:30	6.5	3	1	0	0	0	0	0	0	0	0	0	0	0	0	0	No	2	1	0	1	0	0	0	0	1	1	0
2	762	Sichuan	2	2	2	18	158	55	22.0317	1	1	1		1			2	1	00:00:00	0	08:10:00	7.5	4	1	0	1	1	0	0	0	0	0	0	0	0	0	1	repeated thoughts in bed	3	1	0	0	0	1	0	1	1	0	0
1	763	Sichuan	2	2	2	19	168	62	21.9671	1	1	1		1			4	3	23:45	0	07:15:00	6.5	3	1	0	1	1	0	1	0	0	0	0	0	1	2	0	No	4	1	0	1	0	1	0	1	1	0	0
1	764	Sichuan	2	2	2	18	157	42	17.0392	1	1	1		1			2	3	23:40	1	7:20	5.5	2	2	0	2	2	2	1	0	1	0	0	2	0	0	2	staying up late to work or study	11	2	2	2	2	1	0	2	1	0	0
1	765	Sichuan	2	2	2	19	166	62	22.4996	1	1	1		1			3	3	00:00:00	0	07:00:00	6.5	3	0	0	3	1	0	0	0	0	0	0	2	1	0	0	No	4	0	0	1	0	1	0	2	1	1	0
1	766	Sichuan	2	1	2	19	167	50	17.9282	1	1	1		1			3	3	22:30:00	0	07:00:00	6.5	3	0	0	0	0	0	0	0	0	0	0	0	0	0	0	No	2	0	0	1	1	0	0	0	1	0	0
1	767	Sichuan	2	2	2	17	167	63	22.5896	1	1	1		1			1	1	23:00:00	0	7:30	6.5	3	1	0	1	1	1	0	0	0	0	0	0	0	0	0	No	5	1	1	1	1	0	0	1	1	0	0
1	768	Sichuan	2	1	1	18	178	67	21.1463	1	1	1		2	2	1	1	3	00:00:00	0	7:30	6.5	3	1	0	2	1	1	0	0	1	0	1	0	0	1	0	No	6	1	1	1	0	1	0	2	1	0	0
1	769	Shandong	2	2	2	19	166	55	19.9594	1	1	1		1			2	3	23:00:00	0	06:30:00	6.5	3	1	0	0	0	0	1	1	2	0	2	0	1	0	0	No	3	1	0	1	0	1	0	0	0	0	1
2	770	Sichuan	2	2	2	18	158	46	18.4265	1	1	1		1			2	3	23:30:00	1	08:30:00	7.5	4	0	0	0	0	0	0	0	0	0	0	0	0	0	0	No	2	0	1	0	1	0	0	0	1	0	0
2	771	Jiangsu	1	2	1	18	170	60	20.7612	1	1	1		1			1	1	22:00	2	6:00	7.5	4	0	0	0	0	0	0	0	0	0	0	0	0	0	0	No	1	0	1	0	0	0	0	0	1	0	1
1	772	Jiangsu	1	2	2	17	160	80	31.25	1	1	1		1			1	1	23:00:00	0	6:20	6.5	3	0	0	1	1	0	0	0	1	0	0	1	1	0	0	No	3	0	0	1	0	1	0	1	1	0	1
1	773	Jiangsu	1	2	2	17	168	52.5	18.6012	1	1	1		1			1	1	22:30:00	0	06:30:00	6.5	3	0	0	0	0	0	0	0	0	1	1	0	1	0	0	No	3	0	0	1	1	1	0	0	1	0	0
1	774	Shandong	2	2	2	20	158	54	21.6311	1	1	1		1			3	3	23:30:00	1	06:30:00	5.5	2	1	0	3	2	2	3	0	0	0	0	2	0	0	0	No	10	1	2	2	1	1	0	3	1	1	0
1	775	Sichuan	2	2	2	18	162	60	22.8624	1	1	1		1			2	3	23:00:00	2	07:10:00	6.5	3	1	0	3	2	2	3	2	1	2	1	0	1	1	0	No	10	1	2	1	1	2	0	3	1	1	1
2	776	Sichuan	2	2	2	19	158	47	18.8271	1	1	1		1			2	1	23:30:00	0	6:50	7.5	4	1	0	1	1	0	0	0	1	2	0	0	0	0	0	No	3	1	0	0	0	1	0	1	1	0	1
1	777	Shandong	2	2	2	20	163	53	19.9481	6	1	1		1			2	3	00:30:00	1	08:00:00	5.5	2	2	0	0	3	2	3	2	0	0	0	0	0	0	0	No	11	2	2	2	2	1	0	2	0	1	1
1	778	Sichuan	2	2	1	18	167	70	25.0995	1	1	1		1			2	3	00:00:00	1	7:30	5.5	2	1	0	0	0	0	0	1	0	0	0	0	0	0	0	No	7	1	1	2	2	1	0	0	1	1	0
2	779	Sichuan	2	2	2	18	164	60	22.3081	1	1	1		1			1	1	23:30:00	0	07:00:00	7.5	4	1	0	2	1	0	0	0	0	0	1	0	0	0	0	No	4	1	0	0	0	1	0	2	1	0	0
2	780	Sichuan	2	2	2	18	155	48	19.9792	1	1	1		1			2	1	00:00:00	0	08:30:00	7.5	4	1	0	3	2	0	0	0	0	2	1	1	1	1	1	the dormitory environment affects sleep	5	1	0	0	0	1	0	3	1	0	0
2	781	Sichuan	2	2	1	19	170	85	29.4118	1	1	1		1			1	3	23:50:00	0	07:15:00	7.5	4	1	0	1	1	0	0	0	0	0	0	0	0	0	0	No	2	1	0	0	0	0	0	1	1	1	1
1	782	Sichuan	2	2	2	18	155	55	22.8928	1	1	1		1			2	1	23:30:00	1	6:50	6.5	3	0	0	0	0	0	0	0	0	0	0	0	0	0	0	No	2	0	1	1	0	0	0	0	1	0	0
1	783	Sichuan	2	2	2	18	159	52	20.5688	1	1	1		1			3	1	23:30:00	0	7:25	6.5	3	0	0	2	1	0	2	0	0	0	1	1	0	1	0	No	5	0	0	1	1	1	0	2	1	0	0
1	784	Jiangsu	1	2	2	18	159	50	19.7777	1	1	1		1			3	2	00:00:00	1	6:50	5.5	2	2	0	3	2	2	0	0	0	0	3	3	2	0	0	No	11	2	2	2	1	1	0	3	1	1	0
1	785	Sichuan	2	1	2	18	168	52	18.424	1	1	1		1			2	3	00:00:00	3	7:20	6.5	3	0	0	3	1	0	2	0	0	0	0	0	2	0	0	No	6	0	2	1	0	1	0	2	1	0	1
1	786	Sichuan	2	1	2	18	159	54	21.3599	5	1	1		1			2	1	22:30:00	1	07:00:00	6.5	3	2	0	2	0	3	3	0	0	2	2	2	3	2	2	staying up late to work or study	9	2	2	1	1	2	0	1	0	0	0
1	787	Shandong	2	2	1	18	175	95	31.0204	1	1	1		1			4	3	23:30:00	0	06:30:00	6.5	3	1	0	2	1	2	0	0	1	0	2	0	0	1	0	No	6	1	1	1	0	1	0	2	0	1	1
1	788	Sichuan	2	2	1	17	175	64	20.898	5	1	1		2	2	3	3	3	00:30:00	2	7:20	5.5	2	1	0	1	2	1	0	1	0	1	1	1	1	1	1	No	9	1	2	2	1	1	0	2	1	0	0
1	789	Sichuan	2	1	2	18	156	50	20.5457	1	1	1		2	1	1	3	3	00:00:00	1	06:40:00	5.5	2	2	0	2	2	2	2	0	1	0	0	1	1	0	1	the dormitory environment affects sleep	10	2	2	2	1	1	0	2	0	1	1
1	790	Sichuan	2	2	1	18	173	60	20.0474	1	1	1		2	1	1	1	2	00:00:00	1	7:30	6.5	3	3	0	2	0	0	0	0	0	0	0	0	0	0	0	No	6	3	1	1	0	0	0	1	1	1	1
1	791	Shandong	2	2	2	20	165	60	22.0386	1	1	1		1			1	2	00:30:00	2	06:30:00	4.5	1	1	0	0	1	0	0	0	0	0	0	1	1	0	0	No	8	1	1	3	1	1	0	1	1	1	0
1	792	Sichuan	2	2	2	19	173	54	18.0427	1	1	1		1			2	3	23:30:00	2	7:05	6.5	3	1	0	2	1	2	1	2	0	0	0	0	0	0	0	No	7	1	2	1	0	1	0	2	1	1	0
1	793	Jiangsu	1	2	2	16	158	92	36.8531	1	1	1		1			1	1	23:00:00	0	06:40:00	3	1	0	0	0	0	0	0	0	0	0	0	0	0	0	0	No	6	0	0	3	3	0	0	0	1	0	0
1	794	Jiangsu	1	2	2	18	154	86	36.2624	1	1	1		1			1	3	22:30:00	1	6:20	4.5	1	2	0	2	0	0	1	1	0	0	0	2	0	0	0	No	11	2	1	3	3	1	0	1	0	0	0
2	795	Sichuan	1	2	1	18	155	50	20.8117	1	1	1		1			2	3	23:30:00	1	08:30:00	7.5	4	1	0	2	1	2	1	0	0	0	2	2	0	0	0	No	7	1	2	0	1	1	0	2	1	1	0
1	796	Sichuan	2	2	2	20	163	48	18.0662	1	1	1		1			1	3	23:30:00	0	07:00:00	5.5	2	1	0	0	0	1	0	1	0	0	1	0	0	0	0	No	7	1	1	2	2	1	0	0	1	0	1
1	797	Sichuan	2	1	2	19	172	55	18.5911	1	1	1		1			1	1	00:30:00	0	7:20	6.5	3	0	0	3	1	0	0	0	1	0	1	2	0	1	0	No	4	0	0	1	0	1	0	2	1	0	1
1	798	Jiangsu	1	2	2	17	168	68	24.093	1	1	1		1			2	3	23:00:00	0	06:30:00	5.5	2	0	0	0	0	0	0	0	0	0	0	0	0	0	0	No	4	0	0	2	2	0	0	0	1	0	0
1	799	Sichuan	2	2	2	18	153	54	23.0681	1	1	1		1			3	3	23:30:00	1	07:00:00	6.5	3	2	0	2	1	1	0	1	0	0	1	1	1	0	0	No	7	2	1	1	0	1	0	2	1	1	0
1	800	Sichuan	2	1	2	19	154	41	17.2879	1	1	1		1			1	1	23:50:00	1	7:28	6.5	3	1	0	3	2	0	0	0	0	0	1	0	0	0	0	No	7	1	1	1	0	1	0	3	1	0	1
2	801	Sichuan	2	2	2	18	160	50	19.5312	1	1	1		1			1	2	23:00:00	0	07:00:00	7.5	4	0	0	0	0	0	1	2	1	2	0	0	1	0	0	No	1	0	0	0	0	1	0	0	1	0	1
1	802	Sichuan	2	1	2	18	168	64	22.6757	7	1	1		1			2	3	23:00:00	2	07:00:00	5.5	2	0	0	0	1	3	0	0	0	0	2	0	0	0	0	No	9	0	3	2	2	1	0	1	1	0	1
1	803	Sichuan	2	2	2	18	160	50	19.5312	1	1	1		1			3	3	23:00:00	0	06:30:00	6.5	3	1	0	2	1	2	2	0	0	0	0	0	0	0	0	No	6	1	1	1	0	1	0	2	1	0	0
2	804	Sichuan	2	2	2	18	155	50	20.8117	1	1	1		1			1	3	00:00:00	2	9:00	7.5	4	1	0	2	1	2	0	0	0	0	0	0	2	0	0	No	7	1	2	0	1	1	0	2	1	1	0
2	805	Sichuan	2	2	1	19	163	51	19.1953	5	1	1		2	1	1	1	3	23:00:00	1	7:25	7.5	4	1	0	1	1	1	1	0	0	0	1	0	1	0	0	No	4	1	1	0	0	1	0	1	1	1	0
1	806	Sichuan	2	2	2	19	168	82	29.0533	1	1	1		1			3	1	23:30:00	2	07:00:00	6.5	3	1	0	3	2	3	0	0	0	2	0	0	0	0	0	No	9	1	3	1	0	1	0	3	1	1	1
2	807	Sichuan	2	2	1	18	172	55	18.5911	1	1	1		1			3	1	23:30:00	1	7:30	7.5	4	2	0	0	0	0	0	0	0	0	0	0	0	0	0	No	3	2	1	0	0	0	0	0	1	0	0
2	808	Sichuan	2	1	1	18	175	64	20.898	1	1	1		2	1	1	2	3	23:30:00	0	07:15:00	7.5	4	1	0	2	1	0	0	0	0	0	0	0	0	0	0	No	3	1	0	0	0	0	0	2	1	0	0
1	809	Sichuan	2	2	2	20	157	52	21.0962	5	1	1		1			4	3	23:30:00	0	06:40:00	6.5	3	1	0	1	1	0	1	0	0	0	1	0	1	1	0	No	4	1	0	1	0	1	0	1	1	0	0
1	810	Jiangsu	1	2	2	17	162	55	20.9572	1	1	1		1			3	3	23:30:00	0	6:20	6.5	3	0	0	3	1	0	1	1	0	0	0	0	0	0	0	No	4	0	0	1	0	1	0	2	1	0	0
1	811	Jiangsu	1	1	1	16	175	71	23.1837	1	1	1		1			2	3	20:00:00	0	6:00	5.5	2	0	0	1	1	0	0	0	0	1	0	0	1	0	0	No	7	0	0	2	3	1	0	1	0	0	1
1	812	Jiangsu	1	2	1	18	180	63	19.4444	1	1	1		1			1	3	23:10:00	0	06:40:00	6.5	3	1	0	0	0	0	0	1	0	0	0	0	1	0	0	No	3	1	0	1	0	1	0	0	1	0	1
1	813	Shandong	2	2	1	20	176	61	19.6927	1	1	1		1			3	3	01:00:00	0	06:30:00	6.5	3	1	0	2	0	0	1	0	0	0	0	0	0	0	0	No	4	1	0	1	0	1	0	1	1	0	1
1	814	Sichuan	2	2	1	18	165	53	19.4674	1	1	1		1			2	1	00:00:00	0	7:30	6.5	3	1	0	2	1	1	1	0	0	0	0	0	0	0	0	No	6	1	1	1	0	1	0	2	1	1	0
1	815	Shandong	2	5	1	19	170	50	17.301	1	1	1		1			1	1	23:00:00	0	6:15	5.5	2	0	0	3	1	0	0	0	0	0	0	0	0	0	0	No	5	0	0	2	1	0	0	2	0	1	0
1	816	Jiangsu	1	2	2	16	165	56.5	20.753	1	1	1		1			1	1	22:30:00	1	7:30	6.5	3	0	0	2	1	3	0	0	0	0	0	0	0	0	0	No	7	0	2	1	2	0	0	2	1	0	0
1	817	Sichuan	2	2	2	18	163	49	18.4425	1	1	1		1			3	1	23:00:00	1	07:00:00	6.5	3	1	0	1	1	0	0	0	3	0	1	1	0	0	0	No	6	1	1	1	1	1	0	1	1	0	0
1	818	Jiangsu	1	5	2	16	161	67.5	26.0407	1	1	1		1			1	1	23:00:00	0	06:30:00	5.5	2	1	0	3	0	0	0	0	0	0	0	2	0	1	0	No	8	1	0	2	2	1	0	2	1	0	1
2	819	Ningxia	2	2	2	20	158.8	52	20.6206	3	1	1		1			1	3	23:00:00	1	6:50	7.5	4	1	0	0	0	2	1	2	0	0	0	0	0	0	0	No	4	1	2	0	0	1	0	0	0	0	0
1	820	Ningxia	2	2	2	21	155	49	20.3954	1	1	1		1			1	1	23:00:00	1	6:50	6.5	3	1	0	1	1	1	0	0	0	0	0	0	0	0	0	No	5	1	1	1	1	0	0	1	1	0	0
1	821	Ningxia	2	5	2	21	162	54	20.5761	3	1	1		1			2	2	23:30:00	1	07:00:00	6.5	3	1	0	1	1	1	0	0	0	0	0	0	0	0	0	No	4	1	1	1	0	0	0	1	1	1	1
1	822	Jiangsu	1	2	1	17	178	57	17.9902	1	1	1		1			3	2	23:30:00	0	06:30:00	6.5	3	1	0	3	1	0	0	0	0	0	0	0	0	0	0	No	4	1	0	1	0	0	0	2	1	1	1
1	823	Sichuan	2	1	2	18	152	62	26.8352	1	1	1		1			3	3	00:00:00	0	08:00:00	6.5	3	1	0	1	1	0	0	0	1	1	0	0	0	0	0	No	5	1	0	1	1	1	0	1	1	0	0
1	824	Jiangsu	1	2	2	17	167	52	18.6453	1	1	1		1			2	3	23:30:00	2	6:50	6.5	3	2	0	2	1	2	1	0	1	1	2	0	1	1	0	No	8	2	2	1	0	1	0	2	1	1	1
2	825	Jiangsu	1	1	2	16	163	45	16.937	1	1	1		1			2	3	23:00:00	0	06:30:00	7.5	4	1	0	0	0	0	0	0	0	0	0	0	0	0	0	No	1	1	0	0	0	0	0	0	1	0	0
2	826	Jiangsu	1	1	2	16	163	98	36.8851	1	1	1		1			1	3	23:00:00	1	06:30:00	7.5	4	1	0	2	1	0	0	0	0	0	0	0	0	0	0	No	4	1	1	0	0	0	0	2	0	0	0
1	827	Sichuan	2	2	2	18	157	51	20.6905	1	1	1		1			2	3	23:00:00	1	07:00:00	6.5	3	2	0	3	2	0	0	1	0	0	1	0	0	0	0	No	9	2	1	1	1	1	0	3	1	1	1
1	828	Jiangsu	1	2	2	16	165	53	19.4674	1	1	1		1			3	1	23:30:00	0	6:50	6.5	3	1	0	2	1	0	0	0	0	0	0	0	2	0	0	No	5	1	0	1	0	1	0	2	1	0	1
2	829	Sichuan	2	2	2	19	158	50	20.0288	7	1	1		1			2	3	00:00:00	0	08:00:00	7.5	4	0	0	0	0	0	0	0	0	1	0	0	0	0	0	No	1	0	0	0	0	1	0	0	1	0	0
1	830	Jiangsu	1	2	2	16	168	55	19.487	1	1	1		1			3	1	01:00:00	0	06:30:00	6.5	3	0	0	3	0	0	1	0	0	0	0	0	0	0	0	No	4	0	0	1	0	1	0	2	1	1	0
2	831	Sichuan	2	5	2	18	157	47	19.0677	1	1	1		1			1	3	23:30:00	0	07:00:00	7.5	4	0	0	1	1	0	0	0	0	0	0	0	0	0	0	No	1	0	0	0	0	0	0	1	1	0	0
1	832	Ningxia	2	2	2	21	165	55	20.202	3	1	1		1			2	1	22:45	0	6:10	6.5	3	1	0	1	1	1	0	0	0	0	0	2	1	0	0	No	5	1	1	1	0	1	0	1	1	0	0
1	833	Ningxia	2	2	2	20	162	54	20.5761	3	1	1		1			2	1	00:00:00	1	07:00:00	5.5	2	1	0	3	2	1	0	0	0	0	0	0	0	0	0	No	8	1	1	2	1	0	0	3	0	0	1
1	834	Jiangsu	1	2	2	18	160	50	19.5312	1	1	1		1			1	1	23:30:00	3	06:40:00	5.5	2	2	0	3	2	3	1	0	0	0	0	0	0	0	0	No	12	2	3	2	1	1	0	3	0	1	0
1	835	Ningxia	2	2	1	19	175	77	25.1429	1	1	1		1			1	3	00:30:00	0	06:55:00	6.5	3	1	0	2	1	1	0	0	0	2	1	1	0	0	0	No	6	1	1	1	0	1	0	2	1	1	0
1	836	Jiangsu	1	5	1	16	170	55	19.0311	1	1	1		1			3	1	23:00:00	2	06:30:00	6.5	3	2	0	2	0	1	1	0	0	0	1	0	0	1	0	No	7	2	2	1	0	1	0	1	0	0	0
2	837	Sichuan	2	2	2	18	158	55	22.0317	1	1	1		1			1	2	00:30:00	0	08:30:00	7.5	4	1	0	0	0	0	0	0	0	0	0	0	0	0	0	No	1	1	0	0	0	0	0	0	1	1	1
1	838	Jiangsu	1	2	1	16	167	60	21.5139	1	1	1		1			3	3	23:00:00	0	6:20	6.5	3	2	0	2	0	0	2	0	0	0	0	0	0	0	0	No	5	2	0	1	0	1	0	1	0	1	1
1	839	Jiangsu	1	1	2	16	168	56	19.8413	1	1	1		1			2	1	23:30:00	0	06:20:00	5.5	2	1	0	1	1	0	0	0	0	0	0	0	0	0	0	No	5	1	0	2	1	0	0	1	0	1	0
2	840	Sichuan	2	2	1	18	176	68	21.9525	1	1	1		1			2	1	23:00:00	1	07:00:00	7.5	4	1	0	1	1	0	0	0	1	0	0	0	0	0	0	No	4	1	1	0	0	1	0	1	1	0	0
1	841	Jiangsu	1	1	1	16	158	55	22.0317	1	1	1		1			2	3	23:15:00	2	6:20	6.5	3	2	0	3	2	2	2	2	2	3	3	0	0	0	3	the dormitory environment affects sleep	10	2	2	1	0	2	0	3	1	1	0
1	842	Jiangsu	1	2	2	16	167	52	18.6453	1	1	1		1			2	3	22:30:00	0	06:30:00	6.5	3	0	0	0	0	0	0	0	0	0	0	0	0	0	0	No	2	0	0	1	1	0	0	0	0	0	1
1	843	Sichuan	2	2	1	18	173	57	19.0451	1	1	1		2	1	1	1	3	00:45:00	1	7:20	6.5	3	0	0	1	0	0	0	1	0	0	0	0	2	0	0	No	4	0	1	1	0	1	0	1	1	1	1
1	844	Ningxia	2	2	2	21	169	60	21.0077	1	1	1		1			3	3	23:00:00	1	6:50	6.5	3	1	0	2	1	2	2	0	0	0	0	0	0	0	0	No	8	1	2	1	1	1	0	2	1	0	1
1	845	Jiangsu	1	2	2	16	172	80	27.0416	1	1	1		2	1	1	1	3	23:30:00	1	6:15	5.5	2	1	0	3	3	2	2	0	1	1	2	0	1	0	1	No	10	1	2	2	1	1	0	3	0	1	0
1	846	Ningxia	2	2	2	20	155	47	19.563	3	1	1		1			2	1	00:00:00	0	7:05	6.5	3	1	0	0	0	0	0	0	0	0	0	0	0	0	0	No	2	1	0	1	0	0	0	0	1	1	0
1	847	Ningxia	2	2	2	21	162	57	21.7193	1	1	1		1			2	3	23:30:00	1	06:45:00	6.5	3	1	0	1	0	1	1	0	1	0	1	0	0	0	0	No	5	1	1	1	0	1	0	1	0	1	0
2	848	Jiangsu	1	2	2	16	162	65	24.7676	1	1	1		1			2	2	22:50:00	0	06:40:00	7.5	4	0	0	0	0	0	0	0	0	0	0	0	0	0	0	No	0	0	0	0	0	0	0	0	0	0	1
1	849	Ningxia	2	2	2	20	163	54	20.3244	3	1	1		1			3	1	23:00:00	1	6:50	6.5	3	1	0	3	3	2	1	1	0	0	0	2	2	0	3	mood problems	9	1	2	1	1	1	0	3	1	0	1
1	850	Ningxia	2	2	2	21	155	47	19.563	3	1	1		1			2	3	00:00:00	2	7:05	6.5	3	1	0	2	1	2	1	0	1	1	1	1	1	0	1	staying up late to work or study	7	1	2	1	0	1	0	2	1	1	0
1	851	Shandong	2	2	1	19	175	80	26.1224	1	1	1		1			2	3	00:00:00	0	6:20	6.5	3	1	0	0	0	0	0	0	0	0	0	0	0	0	0	No	2	1	0	1	0	0	0	0	1	0	0
2	852	Sichuan	2	1	1	19	171	56	19.1512	1	1	1		1			2	1	23:10:00	1	06:30:00	8.5	5	1	0	1	0	0	0	0	0	0	0	0	0	0	1	No	4	1	1	0	0	1	0	1	0	0	1
2	853	Sichuan	2	2	2	18	162	52	19.8141	1	1	1		1			1	2	23:00:00	0	08:10:00	7.5	4	1	0	2	1	0	0	0	1	0	0	2	0	0	0	No	5	1	0	0	1	1	0	2	1	0	1
1	854	Jiangsu	1	2	2	16	165	48	17.6309	1	1	1		1			2	3	22:50:00	1	06:40:00	5.5	2	2	0	2	2	2	2	0	2	0	0	0	1	0	0	No	11	2	2	2	2	1	0	2	0	0	0
1	855	Sichuan	2	2	2	18	160	49	19.1406	1	1	1		1			2	1	23:50:00	1	06:55:00	6.5	3	0	0	0	0	0	0	1	0	1	0	0	0	0	0	No	3	0	1	1	0	1	0	0	0	0	0
1	856	Ningxia	2	2	2	21	170	61	21.1073	1	1	1		1			2	3	23:00:00	1	07:00:00	6.5	3	1	0	1	1	1	1	0	0	0	0	0	1	0	0	No	6	1	1	1	1	1	0	1	1	0	0
2	857	Ningxia	2	2	2	21	168	54	19.1327	1	1	1		1			3	3	23:00:00	1	07:00:00	7.5	4	1	0	1	1	1	0	0	0	0	0	0	0	0	0	No	3	1	1	0	0	0	0	1	1	0	1
2	858	Jiangsu	1	1	2	16	160	58	22.6562	1	1	1		1			2	3	23:00:00	0	6:20	7.5	4	1	0	2	1	0	0	1	0	0	0	0	0	0	0	No	4	1	0	0	0	1	0	2	1	0	0
1	859	Jiangsu	1	1	2	16	170	50	17.301	1	1	1		1			2	3	23:30:00	1	6:20	5.5	2	2	0	1	1	2	2	0	0	1	1	1	0	2	3	the dormitory environment affects sleep	10	2	2	2	1	2	0	1	1	1	1
2	860	Shaanxi	2	2	1	21	180	85.6	26.4198	1	1	1		1			1	3	23:00:00	0	06:30:00	7.5	4	0	0	0	1	0	0	0	0	0	0	0	0	0	0	No	1	0	0	0	0	0	0	1	1	0	1
2	861	Chongqing	2	2	2	18	154	48.5	20.4503	1	2	1		1			2	3	23:30:00	0	08:30:00	7.5	4	1	0	0	1	0	0	0	0	1	0	0	1	0	0	No	4	1	0	0	1	1	0	1	1	0	1
1	862	Ningxia	2	2	2	22	166.4	52.55	18.9787	3	1	1		2	1	1	3	3	22:00	1	07:10:00	6.5	3	1	0	1	1	2	0	0	1	0	2	1	0	0	0	No	8	1	2	1	2	1	0	1	1	0	0
1	863	Jiangsu	1	2	2	16	165	90	33.0579	1	1	1		1			3	3	22:40:00	0	06:30:00	6.5	3	0	0	0	0	0	0	0	0	0	0	0	0	0	0	No	2	0	0	1	1	0	0	0	0	0	1
1	864	Jiangsu	1	2	2	17	171	70	23.939	1	1	1		1			1	3	23:00:00	0	6:15	4.5	1	2	0	1	1	0	1	0	0	0	0	0	0	0	3	the dormitory environment affects sleep	10	2	0	3	3	1	0	1	0	0	0
1	865	Ningxia	2	2	2	20	170	70	24.2215	1	1	1		1			2	3	01:00:00	1	07:00:00	6.5	3	1	0	2	2	2	1	2	2	1	2	0	1	0	0	No	7	1	2	1	0	1	0	2	1	1	1
1	866	Ningxia	2	2	1	20	176	53	17.11	1	1	1		2	1	1	1	3	23:30:00	1	07:00:00	6.5	3	1	0	0	1	0	0	0	0	0	0	0	0	0	0	No	4	1	1	1	0	0	0	1	1	1	1
1	867	Jiangsu	1	2	2	17	158	52	20.83	1	1	1		2	1	2	1	3	22:40:00	0	06:30:00	6.5	3	1	0	3	2	2	1	2	0	3	2	2	1	0	0	No	9	1	1	1	1	2	0	3	1	1	0
2	868	Ningxia	2	2	2	22	162	55	20.9572	3	1	1		1			2	3	23:40	0	07:00:00	7.5	4	0	0	0	0	0	0	0	0	0	0	0	0	0	0	No	0	0	0	0	0	0	0	0	0	0	0
1	869	Jiangsu	1	2	2	17	162	50	19.052	1	1	1		1			1	1	23:00:00	2	06:35:00	5.5	2	2	0	1	1	0	2	0	0	1	0	0	1	0	0	No	9	2	1	2	2	1	0	1	0	1	0
1	870	Jiangsu	1	2	2	16	170	62.5	21.6263	1	1	1		1			2	2	22:00	0	06:30:00	6.5	3	0	0	1	1	1	0	0	0	0	0	0	0	0	0	No	4	0	1	1	1	0	0	1	1	0	0
1	871	Jiangsu	1	1	2	16	160	53	20.7031	1	1	1		1			2	1	22:00	0	6:10	5.5	2	1	0	0	0	0	0	0	0	0	0	0	0	0	0	No	5	1	0	2	2	0	0	0	1	0	0
1	872	Sichuan	2	2	1	19	180	65	20.0617	1	1	1		1			1	3	00:00:00	0	7:30	6.5	3	1	0	0	0	0	0	0	0	0	0	0	0	0	0	No	2	1	0	1	0	0	0	0	1	0	0
1	873	Sichuan	2	2	2	18	160	57	22.2656	1	1	1		1			1	1	23:00:00	1	06:45:00	6.5	3	1	0	2	1	1	2	2	2	0	0	2	2	1	2	stressed out state	8	1	1	1	1	2	0	2	1	1	0
1	874	Shandong	2	1	2	18	160	56	21.875	1	1	1		1			1	1	00:00:00	1	6:00	5.5	2	2	0	3	2	2	2	0	0	1	2	2	2	0	3	the dormitory environment affects sleep	11	2	2	2	0	2	0	3	1	0	0
1	875	Jiangsu	1	2	2	16	165	99	36.3636	1	1	1		1			2	1	23:00:00	0	06:30:00	3	1	0	0	2	1	1	0	0	0	0	0	0	0	0	0	No	9	0	1	3	3	0	0	2	1	0	0
1	876	Jiangsu	1	2	2	18	168	54	19.1327	1	1	1		1			2	3	22:30:00	1	06:30:00	6.5	3	1	0	1	1	0	1	2	0	0	0	0	0	0	0	No	6	1	1	1	1	1	0	1	0	0	0
1	877	Shandong	2	2	1	17	180	72	22.2222	1	1	1		1			4	3	23:30:00	0	06:30:00	6.5	3	1	0	2	0	0	0	1	0	0	2	0	0	0	0	No	4	1	0	1	0	1	0	1	1	0	0
1	878	Shandong	2	2	1	18	190	110	30.4709	1	1	1		1			3	2	23:00:00	0	6:15	6.5	3	0	0	2	1	0	0	0	0	3	2	0	0	0	0	No	4	0	0	1	0	1	0	2	1	0	1
2	879	Ningxia	2	1	2	28	163	65	24.4646	3	1	1		1			3	2	00:00:00	1	07:00:00	7.5	4	0	0	0	0	0	0	0	0	2	2	0	0	0	0	No	2	0	1	0	0	1	0	0	1	0	0
1	880	Shandong	2	2	2	20	171	72	24.623	1	1	1		1			2	3	23:00:00	0	6:00	6.5	3	0	0	0	0	0	0	0	0	0	0	0	0	0	0	No	1	0	0	1	0	0	0	0	1	0	0
2	881	Shandong	2	2	2	18	160	76	29.6875	1	1	1		1			1	3	23:00:00	1	6:15	7.5	4	1	0	2	1	0	0	1	0	0	0	2	0	0	0	No	5	1	1	0	0	1	0	2	1	0	0
1	882	Ningxia	3	2	1	25	175	75	24.4898	1	1	1		1			4	1	23:30:00	3	7:30	5.5	2	1	0	1	1	1	1	0	0	2	0	2	0	0	0	No	9	1	2	2	2	1	0	1	1	1	1
1	883	Shandong	2	1	2	18	170	58	20.0692	1	1	1		1			3	3	23:30:00	1	6:00	5.5	2	1	0	3	3	2	2	0	0	0	0	0	1	1	0	No	9	1	2	2	0	1	0	3	0	0	1
1	884	Shandong	2	2	1	20	160	65	25.3906	1	1	1		2	1	1	2	3	00:00:00	0	6:25	6.5	3	0	0	3	0	0	0	0	0	0	0	0	0	0	0	No	3	0	0	1	0	0	0	2	1	1	0
1	885	Shandong	2	2	1	18	175	53	17.3061	1	1	1		1			3	1	23:00:00	0	6:00	6.5	3	0	0	0	0	0	0	0	0	0	0	0	1	0	2	the dormitory environment affects sleep	2	0	0	1	0	1	0	0	0	0	0
1	886	Shandong	2	2	2	18	177	55	17.5556	1	1	1		2	1	1	3	2	22:00	0	6:10	6.5	3	1	0	2	1	0	0	0	0	0	1	3	0	0	0	No	6	1	0	1	1	1	0	2	1	1	1
1	887	Shandong	2	1	2	19	168	96	34.0136	1	1	1		1			1	2	00:00:00	0	06:30:00	6.5	3	1	0	2	1	0	0	0	0	0	0	0	0	0	0	No	4	1	0	1	0	0	0	2	0	1	0
1	888	Ningxia	2	2	2	26	157	50	20.2848	3	1	1		1			2	2	22:30:00	1	06:30:00	6.5	3	0	0	0	1	0	0	0	0	0	0	0	0	0	0	No	4	0	1	1	1	0	0	1	0	0	0
1	889	Sichuan	2	2	2	17	162	46	17.5278	1	1	1		1			2	3	23:30:00	0	06:55:00	6.5	3	0	0	0	0	0	0	0	0	0	0	0	0	0	0	No	1	0	0	1	0	0	0	0	1	0	1
1	890	Shandong	2	2	1	20	176	72	23.2438	1	1	1		1			4	3	23:30:00	0	6:00	5.5	2	2	0	2	1	1	3	0	1	2	2	1	2	0	0	No	9	2	1	2	0	2	0	2	0	1	0
1	891	Ningxia	2	2	2	22	165	55	20.202	1	1	1		1			3	3	23:00:00	2	6:00	6.5	3	2	0	3	2	2	2	2	2	1	0	2	0	2	0	No	10	2	2	1	0	2	0	3	0	0	0
1	892	Ningxia	2	2	1	21	169	65	22.7583	3	1	1		1			2	3	00:00:00	1	6:50	6.5	3	1	0	2	1	2	0	0	0	0	0	0	0	0	0	No	6	1	2	1	0	0	0	2	0	0	1
1	893	Shandong	2	2	1	19	170	60	20.7612	1	1	1		1			2	3	00:00:00	0	7:30	6.5	3	1	0	3	0	1	1	1	1	1	1	1	1	2	0	No	6	1	1	1	0	1	0	2	1	0	0
1	894	Shandong	2	2	1	18	175	65	21.2245	1	1	1		1			3	1	23:00:00	0	6:20	6.5	3	1	0	3	2	0	0	0	0	0	0	0	0	0	0	No	5	1	0	1	0	0	0	3	0	0	0
2	895	Shandong	2	2	1	19	171	55	18.8092	1	1	1		1			3	2	23:00:00	0	6:20	7.5	4	0	0	1	1	0	0	0	0	0	0	0	0	0	0	No	1	0	0	0	0	0	0	1	1	0	0
1	896	Ningxia	2	2	1	20	172	62	20.9573	3	1	1		1			3	3	23:30:00	1	6:20	6.5	3	1	0	0	0	1	1	1	0	0	0	0	0	1	1	Wake up in the middle of the night	4	1	1	1	0	1	0	0	0	1	0
1	897	Jiangsu	1	2	1	16	180	75	23.1481	1	1	1		1			2	3	23:00:00	3	6:00	6.5	3	1	0	3	0	2	0	0	0	0	0	1	0	0	0	No	8	1	3	1	0	1	0	2	0	0	1
1	898	Ningxia	3	2	2	24	165	53	19.4674	1	1	1		1			2	3	00:00:00	0	7:20	6.5	3	1	0	2	2	1	1	1	1	0	2	0	0	0	0	No	6	1	1	1	0	1	0	2	1	1	0
1	899	Sichuan	2	1	2	19	155	56	23.3091	1	1	1		1			3	3	23:30:00	1	07:10:00	6.5	3	2	0	0	1	1	2	0	0	0	0	0	0	0	1	repeated thoughts in bed	6	2	1	1	0	1	0	1	1	0	1
1	900	Ningxia	2	2	1	20	171	64	21.8871	3	1	1		1			3	3	00:00:00	0	6:50	6.5	3	1	0	0	1	1	1	0	0	0	1	0	1	0	0	No	5	1	1	1	0	1	0	1	0	1	0
1	901	Ningxia	2	2	2	20	156	46	18.902	1	1	1		1			2	3	23:00:00	2	06:40:00	6.5	3	1	0	1	1	0	1	1	0	0	1	1	2	0	0	No	5	1	1	1	0	1	0	1	0	0	1
2	902	Shandong	2	2	1	17	185	60	17.531	1	1	1		1			3	1	22:30:00	1	6:15	7.5	4	1	0	2	1	1	1	0	0	0	0	0	0	0	1	mood problems	5	1	1	0	0	1	0	2	0	0	0
1	903	Jiangsu	1	2	2	16	162	56	21.3382	1	1	1		1			3	1	23:00:00	0	06:30:00	5.5	2	1	0	1	1	0	0	0	0	3	0	0	0	0	0	No	7	1	0	2	2	1	0	1	0	0	1
1	904	Jiangsu	1	2	2	17	160	47	18.3594	1	1	1		1			2	3	23:00:00	1	06:40:00	6.5	3	1	1	1	1	2	1	1	0	0	1	0	1	1	0	No	7	1	2	1	0	1	1	1	0	0	1
1	905	Sichuan	2	2	1	19	175	65	21.2245	1	1	1		2	1	1	3	3	1:30	1	7:30	5.5	2	0	0	3	3	2	0	1	0	1	2	2	0	0	0	No	8	0	2	2	0	1	0	3	1	0	0
2	906	Sichuan	2	2	1	17	169	70	24.5089	1	1	1		1			3	3	23:30:00	0	7:20	7.5	4	1	0	2	1	0	0	1	0	0	1	0	0	0	0	No	4	1	0	0	0	1	0	2	1	0	0
1	907	Ningxia	2	2	1	25	174	58	19.1571	3	1	2	1	2	2	1	3	1	23:00:00	0	07:00:00	6.5	3	0	0	0	1	0	0	0	0	0	0	0	0	0	0	No	3	0	0	1	1	0	0	1	0	0	1
1	908	Jiangsu	1	2	2	16	165	49	17.9982	1	1	1		1			2	3	22:40:00	0	06:30:00	6.5	3	1	0	0	1	0	0	1	0	0	2	0	1	1	0	No	5	1	0	1	1	1	0	1	0	0	0
1	909	Jiangsu	1	2	2	16	170	56	19.3772	1	1	1		1			1	3	23:00:00	1	6:00	6.5	3	1	0	2	1	0	2	0	0	0	0	0	0	0	0	No	6	1	1	1	0	1	0	2	0	1	1
2	910	Ningxia	3	2	2	27	158	55	22.0317	3	1	1		1			3	3	23:00:00	0	08:00:00	7.5	4	0	0	0	0	0	0	0	0	0	0	0	0	0	0	No	1	0	0	0	1	0	0	0	0	0	0
1	911	Ningxia	3	1	1	25	176	68	21.9525	1	1	1		1			3	3	01:00:00	1	7:20	5.5	2	1	0	1	1	2	2	1	0	0	0	0	0	0	0	No	7	1	2	2	0	1	0	1	0	0	1
1	912	Jiangsu	1	2	2	16	167	59	21.1553	1	1	1		1			3	3	23:00:00	2	06:30:00	6.5	3	0	0	2	0	1	2	0	0	0	1	1	1	1	0	No	5	0	2	1	0	1	0	1	1	0	1
1	913	Sichuan	2	2	2	18	160	55	21.4844	1	1	1		1			2	1	23:30:00	2	7:20	6.5	3	2	1	3	2	2	3	0	0	0	0	0	0	0	0	No	11	2	2	1	1	1	1	3	1	0	0
1	914	Jiangsu	1	1	2	16	165	50	18.3655	1	1	1		1			2	1	23:30:00	0	6:20	6.5	3	1	0	1	0	1	0	0	0	1	0	1	0	1	0	No	5	1	1	1	0	1	0	1	0	0	1
1	915	Shandong	2	2	2	17	157	53	21.5019	6	1	1		1			1	3	00:30:00	0	6:20	5.5	2	1	0	1	1	0	0	0	0	2	0	0	1	0	0	No	5	1	0	2	0	1	0	1	1	1	0
1	916	Ningxia	2	2	1	28	172	70	23.6614	1	1	2	7	2	2	1	2	3	23:00:00	1	07:00:00	5.5	2	3	0	3	3	3	3	0	2	0	0	3	0	3	0	No	14	3	2	2	2	2	0	3	1	0	0
1	917	Jiangsu	1	2	2	16	165	55	20.202	1	1	1		1			3	3	23:30:00	0	06:30:00	6.5	3	1	0	2	1	1	1	0	1	0	1	0	0	0	0	No	6	1	1	1	0	1	0	2	1	0	0
1	918	Jiangsu	1	2	2	17	169	52.5	18.3817	1	1	1		2	1	2	2	3	23:00:00	1	06:30:00	6.5	3	1	0	2	2	2	2	0	0	0	1	0	2	0	0	No	7	1	2	1	0	1	0	2	0	1	0
2	919	Shandong	2	2	2	20	161	48.6	18.7493	1	1	1		1			1	3	22:30:00	2	7:30	7.5	4	2	0	3	1	3	2	0	0	0	0	0	0	0	0	No	9	2	3	0	1	1	0	2	0	0	0
1	920	Jiangsu	1	2	2	16	166	49	17.782	1	1	1		1			3	2	22:30:00	0	06:30:00	6.5	3	0	0	0	0	0	0	1	0	0	1	0	1	0	0	No	3	0	0	1	1	1	0	0	0	0	0
2	921	Ningxia	2	2	2	23	160	50	19.5312	1	1	1		1			1	3	21:00:00	1	08:30:00	7.5	4	1	0	0	0	0	0	0	0	0	0	0	0	0	0	No	4	1	1	0	2	0	0	0	0	1	1
1	922	Hunan	3	2	2	26	161	83	32.0204	1	1	1		1			1	3	00:00:00	1	07:00:00	6.5	3	2	0	1	1	1	1	0	0	0	0	0	1	0	0	No	6	2	1	1	0	1	0	1	1	0	1
1	923	Ningxia	3	2	2	26	163	60	22.5827	1	1	1		1			1	3	23:40	2	7:20	6.5	3	2	0	2	1	1	0	0	0	0	0	0	0	0	0	No	7	2	2	1	0	0	0	2	0	1	1
1	924	Sichuan	2	2	2	18	170	61	21.1073	1	1	1		2	1	1	3	1	00:00:00	1	7:20	6.5	3	1	0	2	1	0	0	0	0	0	0	2	0	0	0	No	6	1	1	1	0	1	0	2	1	1	0
1	925	Jiangsu	1	2	2	16	160	50	19.5312	1	1	1		1			4	2	23:30:00	0	6:10	6.5	3	0	0	3	0	1	2	2	1	0	0	0	0	0	0	No	5	0	1	1	0	1	0	2	1	0	0
1	926	Ningxia	3	2	2	26	160	60	23.4375	1	1	1		1			4	3	00:00:00	0	07:00:00	5.5	2	2	0	2	2	0	0	0	0	0	0	0	0	0	0	No	7	2	0	2	1	0	0	2	1	1	1
1	927	Jiangsu	1	2	2	16	170	60	20.7612	1	1	1		1			2	3	22:30:00	0	06:30:00	6.5	3	1	0	2	0	0	1	1	0	0	0	0	1	0	0	No	5	1	0	1	1	1	0	1	0	1	0
2	928	Ningxia	2	1	2	27	156	52	21.3675	1	2	1		1			3	3	23:00:00	0	7:20	7.5	4	1	0	0	0	0	1	1	0	0	0	0	1	0	0	No	2	1	0	0	0	1	0	0	1	0	0
2	929	Sichuan	2	2	1	18	185	70	20.4529	1	1	1		1			1	3	00:30:00	1	7:30	7.5	4	1	0	1	0	0	0	0	0	0	0	0	0	0	0	No	3	1	1	0	0	0	0	1	0	1	0
1	930	Ningxia	2	2	2	26	160	45	17.5781	1	1	1		1			1	3	23:00:00	0	07:00:00	6.5	3	1	0	1	1	0	1	0	0	0	0	0	0	0	0	No	5	1	0	1	1	1	0	1	0	0	1
1	931	Ningxia	2	2	2	25	160	54	21.0938	1	1	1		1			3	3	23:50:00	0	6:50	6.5	3	1	0	2	1	1	3	0	1	0	2	0	1	0	0	No	6	1	1	1	0	1	0	2	0	0	1
1	932	Shandong	2	2	2	19	168	54	19.1327	1	1	1		1			1	1	23:30:00	1	07:00:00	6.5	3	1	0	3	1	1	2	0	0	0	0	1	0	0	0	No	6	1	1	1	0	1	0	2	1	1	0
1	933	Sichuan	2	2	2	19	158	50	20.0288	1	1	1		1			3	1	23:30:00	1	07:10:00	6.5	3	2	0	3	3	2	0	0	0	0	0	0	0	0	0	No	8	2	2	1	0	0	0	3	0	0	1
1	934	Jiangsu	1	2	2	18	167	52	18.6453	1	1	1		1			3	3	22:30:00	1	06:30:00	3.5	1	1	0	0	0	0	0	1	0	0	0	0	0	0	0	No	9	1	1	3	3	1	0	0	0	0	0
1	935	Ningxia	2	2	2	27	167	56	20.0796	1	1	1		1			2	3	23:50:00	2	07:00:00	5.5	2	3	0	3	2	2	1	2	0	0	3	0	1	0	0	No	12	3	2	2	1	1	0	3	0	1	1
2	936	Jiangsu	1	2	2	17	170	56	19.3772	1	1	1		1			3	1	23:00:00	0	6:00	7.5	4	0	0	0	0	0	0	0	0	0	0	0	0	0	0	No	0	0	0	0	0	0	0	0	1	0	1
1	937	Beijing	2	2	2	21	168	54	19.1327	1	1	1		1			2	1	23:00:00	1	08:30:00	6.5	3	1	0	1	1	1	0	0	0	0	0	0	2	0	0	No	7	1	1	1	2	1	0	1	1	0	1
1	938	Ningxia	2	2	1	22	170	78	26.9896	3	1	1		1			3	3	00:00:00	1	6:50	5.5	2	0	0	1	0	1	0	0	0	1	0	0	0	0	0	No	6	0	1	2	1	1	0	1	1	0	0
1	939	Sichuan	2	2	1	19	165	64	23.5078	1	1	1		1			3	3	23:00:00	1	07:10:00	5.5	2	2	0	1	1	2	3	0	0	0	0	2	0	0	0	No	10	2	2	2	2	1	0	1	1	0	1
1	940	Ningxia	3	2	2	25	173	55	18.3768	1	1	1		1			2	1	00:00:00	0	07:00:00	6.5	3	1	0	2	1	1	0	0	0	0	0	0	0	0	0	No	5	1	1	1	0	0	0	2	1	1	1
1	941	Jiangsu	1	2	1	16	166	65	23.5883	1	1	1		1			1	3	23:00:00	2	6:50	6.5	3	1	0	1	2	1	0	1	0	3	0	0	0	0	0	No	8	1	2	1	1	1	0	2	1	1	1
1	942	Shandong	2	2	2	21	164	57	21.1927	1	1	1		2	1	1	3	3	00:00:00	1	08:00:00	6.5	3	1	0	3	2	1	2	1	0	0	2	2	2	0	0	No	8	1	1	1	1	1	0	3	1	1	0
1	943	Yunnan	3	2	2	26	153	44	18.7962	1	1	1		1			3	3	00:00:00	1	07:00:00	6.5	3	1	0	2	1	0	0	0	0	0	0	0	0	0	0	No	5	1	1	1	0	0	0	2	0	0	1
2	944	Ningxia	2	1	2	18	150	48	21.3333	1	1	1		2	1	3	2	3	23:30:00	0	08:00:00	7.5	4	1	0	0	0	0	0	0	0	2	0	0	2	0	0	No	2	1	0	0	0	1	0	0	1	0	0
1	945	Beijing	2	2	2	22	163	43	16.1843	1	1	1		1			2	3	00:00:00	0	7:30	5.5	2	2	0	3	2	1	0	1	0	0	0	0	2	0	0	No	11	2	1	2	2	1	0	3	0	0	0
1	946	Jiangsu	1	2	2	17	167	48	17.2111	1	1	1		1			3	3	23:30:00	0	06:30:00	4.5	1	1	0	1	1	0	0	0	0	0	0	0	0	0	0	No	8	1	0	3	3	0	0	1	0	1	0
1	947	Jiangsu	1	2	1	16	178	68	21.4619	1	1	1		1			2	3	22:30:00	1	7:30	4.5	1	0	0	0	0	0	0	0	0	0	0	0	0	0	0	No	7	0	1	3	3	0	0	0	0	0	0
1	948	Jiangsu	1	2	1	17	180	105	32.4074	1	1	1		1			2	1	00:00:00	3	06:45:00	6.5	3	2	0	1	1	0	0	0	0	3	2	2	0	0	0	No	7	2	2	1	0	1	0	1	0	0	0
1	949	Ningxia	2	2	2	28	158	48	19.2277	1	2	1		1			2	3	23:00:00	1	7:30	6.5	3	1	0	1	3	1	2	1	0	0	0	0	1	0	0	No	7	1	1	1	1	1	0	2	0	0	0
1	950	Ningxia	3	2	2	26	165	66	24.2424	1	2	1		1			3	3	23:00:00	1	08:30:00	6.5	3	1	0	1	1	0	0	0	0	0	0	0	0	0	0	No	6	1	1	1	2	0	0	1	0	0	0
1	951	Jiangsu	1	2	2	17	163	52	19.5717	1	1	1		1			1	3	23:00:00	1	06:40:00	6.5	3	1	0	3	2	2	0	0	0	0	0	0	1	0	1	No	8	1	2	1	0	1	0	3	1	0	0
1	952	Beijing	2	2	2	20	155	50	20.8117	1	1	1		1			2	3	01:00:00	0	07:45:00	6.5	3	1	0	1	0	0	0	0	0	0	0	0	0	0	0	No	3	1	0	1	0	0	0	1	0	0	0
1	953	Beijing	1	1	1	21	178	85	26.8274	1	1	1		2	1	2	1	3	23:30:00	1	08:00:00	6.5	3	2	0	1	0	1	0	1	0	0	0	0	0	0	0	No	7	2	1	1	1	1	0	1	1	0	0
1	954	Jiangsu	1	2	2	17	173	58	19.3792	1	1	1		1			2	3	23:30:00	3	06:45:00	5.5	2	1	0	3	1	2	1	1	2	2	0	0	0	0	0	No	10	1	3	2	1	1	0	2	1	1	0
1	955	Beijing	2	2	2	20	163	46	17.3134	1	1	1		1			3	3	01:00:00	1	7:20	5.5	2	2	0	2	1	2	1	0	1	1	0	2	2	1	0	No	9	2	2	2	0	1	0	2	0	0	0
2	956	Tianjin	2	2	2	21	174	61	20.148	1	1	1		1			3	3	22:00	3	07:00:00	8.5	5	0	0	0	0	0	0	0	0	0	0	0	0	0	0	No	2	0	2	0	0	0	0	0	0	1	1
1	957	Beijing	2	2	2	20	165	63	23.1405	1	1	1		1			3	3	00:00:00	1	7:30	6.5	3	1	0	2	2	1	2	0	0	0	1	0	1	0	0	No	6	1	1	1	0	1	0	2	0	0	0
1	958	Jiangsu	1	2	2	17	166	96	34.8381	1	1	1		1			1	3	23:00:00	0	06:40:00	6.5	3	1	0	1	1	1	0	0	0	0	0	0	0	0	0	No	4	1	1	1	0	0	0	1	1	0	0
1	959	Jiangsu	1	2	2	16	163	50	18.8189	1	1	1		1			3	1	22:00	1	6:20	5.5	2	1	0	2	1	1	0	0	0	0	1	1	0	0	0	No	9	1	1	2	2	1	0	2	1	0	1
1	960	Beijing	2	2	1	20	174	74	24.4418	1	1	1		1			2	3	23:30:00	2	07:00:00	6.5	3	2	0	3	2	1	0	0	1	0	3	0	0	0	0	No	9	2	2	1	0	1	0	3	1	1	0
2	961	Sichuan	2	2	1	18	173	65	21.7181	1	1	1		1			2	3	00:00:00	0	7:30	7.5	4	1	0	2	2	1	0	1	3	3	0	0	1	1	0	No	5	1	1	0	0	1	0	2	0	0	0
2	962	Beijing	2	2	1	21	180	90	27.7778	1	1	1		1			1	1	00:00:00	0	08:00:00	7.5	4	0	0	0	0	1	0	3	0	0	0	0	0	0	0	No	2	0	1	0	0	1	0	0	1	0	1
2	963	Shandong	2	2	2	21	160	58	22.6562	1	1	1		1			3	1	23:00:00	0	7:30	7.5	4	1	0	1	1	0	1	0	0	2	0	0	1	0	0	No	3	1	0	0	0	1	0	1	1	0	0
2	964	Jiangsu	1	2	2	17	163	52	19.5717	1	1	1		1			2	3	23:00:00	0	06:30:00	7.5	4	1	0	0	0	0	0	0	0	0	0	0	0	0	0	No	1	1	0	0	0	0	0	0	0	0	0
1	965	Ningxia	2	2	2	25	155	65	27.0552	1	1	1		1			3	3	23:30:00	2	7:30	6.5	3	1	0	3	2	2	0	0	0	2	0	0	0	0	2	repeated thoughts in bed	9	1	2	1	1	1	0	3	0	0	0
1	966	Jiangsu	1	2	2	20	163	50	18.8189	1	1	1		1			2	3	23:00:00	2	7:30	6.5	3	1	0	1	1	1	1	1	0	0	0	0	1	0	0	No	7	1	2	1	1	1	0	1	0	0	1
2	967	Beijing	2	2	2	20	154.6	56.3	23.5553	1	1	1		2	1	1	3	1	00:30:00	0	08:00:00	7.5	4	1	0	3	1	1	1	1	0	2	1	1	1	0	0	No	5	1	1	0	0	1	0	2	1	0	0
1	968	Shandong	2	5	2	20	163	55	20.7008	1	1	1		1			3	3	23:30:00	2	06:30:00	6.5	3	2	0	3	3	2	0	0	0	0	3	0	2	0	2	mood problems	9	2	2	1	0	1	0	3	1	0	1
1	969	Jiangsu	1	2	2	16	164	50	18.5901	1	1	1		1			3	3	23:30:00	0	05:40:00	6.5	3	2	0	1	1	1	0	1	0	0	1	1	0	0	0	No	6	2	1	1	0	1	0	1	0	1	0
2	970	Ningxia	2	2	2	26	161	53	20.4467	3	1	1		1			3	3	23:00:00	0	07:00:00	7.5	4	0	0	1	1	0	0	0	0	0	0	0	0	0	0	No	1	0	0	0	0	0	0	1	1	0	1
1	971	Ningxia	3	2	2	28	163	46	17.3134	3	1	1		1			3	3	00:00:00	0	07:00:00	6.5	3	0	0	0	0	0	0	1	0	3	0	0	1	0	0	No	2	0	0	1	0	1	0	0	1	0	1
2	972	Beijing	2	5	2	20	165	55	20.202	1	1	1		1			4	3	23:00:00	0	07:00:00	7.5	4	0	0	0	0	0	0	0	0	0	0	0	0	0	0	No	0	0	0	0	0	0	0	0	0	0	1
2	973	Sichuan	2	2	2	18	175	68	22.2041	1	1	1		1			2	1	23:30:00	0	07:00:00	7.5	4	0	0	0	0	0	0	0	0	0	0	0	0	0	0	No	0	0	0	0	0	0	0	0	1	0	1
2	974	Ningxia	2	2	2	20	164	45	16.7311	1	1	1		1			2	2	00:00:00	1	07:00:00	7.5	4	1	0	1	0	0	0	1	0	0	0	0	0	0	0	No	4	1	1	0	0	1	0	1	1	1	1
1	975	Sichuan	2	2	2	18	168	55	19.487	1	1	1		1			2	3	00:00:00	0	07:15:00	6.5	3	1	0	2	1	0	0	0	0	0	0	0	1	0	0	No	5	1	0	1	0	1	0	2	1	0	0
1	976	Shandong	2	2	2	19	162	65	24.7676	1	1	1		1			3	1	23:30:00	0	6:20	5.5	2	1	0	3	1	0	0	0	0	0	0	0	0	0	0	No	6	1	0	2	1	0	0	2	1	0	1
1	977	Fujian	2	5	2	20	158	39	15.6225	1	1	1		2	2	1	3	1	00:00:00	3	7:20	6.5	3	1	0	2	1	0	0	3	0	0	0	0	2	0	0	No	7	1	2	1	0	1	0	2	1	1	0
1	978	Sichuan	2	2	1	18	175	63	20.5714	1	1	2	5	2	1	1	3	1	00:00:00	0	7:30	6.5	3	1	0	2	0	1	0	0	0	1	1	1	0	0	0	No	5	1	1	1	0	1	0	1	1	1	0
1	979	Jiangsu	1	2	1	16	176	58	18.7242	1	1	1		1			3	3	23:00:00	0	07:00:00	5.5	2	0	0	0	1	0	0	0	0	0	0	0	1	0	0	No	6	0	0	2	2	1	0	1	0	1	0
1	980	Sichuan	2	2	2	25	163	62	23.3355	7	1	1		1			3	1	23:30:00	0	06:40:00	6.5	3	1	0	1	1	0	2	0	1	0	1	1	2	1	0	No	4	1	0	1	0	1	0	1	1	0	1
1	981	Sichuan	2	2	1	18	163	81	30.4867	1	1	1		2	2	1	3	1	23:00:00	0	7:30	5.5	2	2	0	3	3	0	3	0	0	0	0	0	0	3	3	Sickness	10	2	0	2	2	1	0	3	0	0	0
1	982	Sichuan	2	2	1	19	170	52	17.9931	5	1	1		2	2	5	2	3	00:00:00	0	07:00:00	5.5	2	1	0	2	1	1	0	0	0	0	1	0	0	0	0	No	8	1	1	2	1	1	0	2	1	1	1
1	983	Jiangsu	1	2	2	18	165	54	19.8347	1	1	1		1			3	3	23:00:00	1	06:30:00	6.5	3	0	0	0	1	0	1	2	0	0	0	0	0	0	0	No	4	0	1	1	0	1	0	1	0	0	0
1	984	Jiangsu	1	2	2	16	163	59.5	22.3945	1	1	1		1			4	1	23:30:00	1	06:35:00	5.5	2	1	0	3	0	0	0	0	0	0	0	0	0	2	1	the dormitory environment affects sleep	8	1	1	2	1	1	0	2	1	0	0
1	985	Jiangsu	1	2	2	18	158	48	19.2277	1	1	1		1			4	1	22:30:00	2	06:20:00	6.5	3	1	0	1	1	0	0	0	0	0	0	0	0	0	0	No	5	1	1	1	1	0	0	1	0	0	0
1	986	Beijing	2	2	2	20	160	56	21.875	1	1	1		1			3	3	23:50:00	2	08:00:00	6.5	3	3	0	3	2	3	0	0	0	0	2	0	0	0	0	No	12	3	3	1	1	1	0	3	1	1	1
2	987	Jiangsu	2	2	2	20	168	53	18.7783	1	1	1		1			1	3	23:30:00	0	7:25	7.5	4	1	0	3	2	0	1	0	0	1	0	1	2	0	0	No	5	1	0	0	0	1	0	3	1	0	1
1	988	Jiangsu	1	2	1	16	173	77	25.7276	1	1	1		1			2	1	00:00:00	0	06:40:00	5.5	2	0	0	2	0	0	0	0	0	0	0	0	0	0	0	No	4	0	0	2	1	0	0	1	0	1	0
1	989	Beijing	2	2	2	20	165	56	20.5693	1	1	1		1			3	3	23:00:00	1	7:30	6.5	3	1	0	3	2	2	2	1	1	0	2	1	1	1	2	the dormitory environment affects sleep	10	1	2	1	1	2	0	3	1	0	1
1	990	Jiangsu	1	2	2	18	164	63	23.4236	1	1	1		1			3	1	23:00:00	1	6:20	6.5	3	1	0	3	1	0	0	0	2	0	0	0	0	0	0	No	6	1	1	1	0	1	0	2	1	1	1
1	991	Beijing	2	2	2	20	157	52	21.0962	1	1	1		1			1	1	1:30	0	7:40	6.5	3	2	0	3	2	1	0	0	0	2	0	0	0	0	0	No	8	2	1	1	0	1	0	3	1	0	0
1	992	Jiangsu	1	2	2	19	163	49.5	18.6307	1	1	1		1			2	3	23:30:00	0	6:00	6.5	3	0	0	1	1	0	0	0	0	0	0	2	0	0	0	No	3	0	0	1	0	1	0	1	1	1	1
1	993	Jiangsu	1	2	2	16	175	70	22.8571	1	1	1		1			1	3	23:30:00	0	06:30:00	5.5	2	1	0	3	3	0	2	1	0	0	0	3	0	0	0	No	8	1	0	2	1	1	0	3	1	1	0
1	994	Ningxia	2	2	2	20	158	58	23.2335	1	1	1		1			1	3	23:00:00	3	6:50	6.5	3	1	0	3	3	3	2	2	0	0	2	2	2	1	2	the dormitory environment affects sleep	11	1	3	1	1	2	0	3	1	0	0
1	995	Jiangsu	1	2	1	16	172	65	21.9713	1	1	1		1			3	1	23:00:00	0	06:45:00	5.5	2	1	0	1	1	0	0	0	0	1	0	0	0	0	0	No	7	1	0	2	2	1	0	1	1	0	0
1	996	Ningxia	2	2	2	24	168	58	20.5499	1	1	1		2	1	1	3	3	23:30:00	0	07:00:00	5.5	2	1	0	3	1	1	0	0	0	0	1	0	1	0	0	No	9	1	1	2	2	1	0	2	1	1	0
1	997	Shandong	2	2	2	18	168	68	24.093	1	1	1		1			1	1	21:30	0	05:50:00	5.5	2	0	0	2	1	0	0	0	0	0	0	0	0	0	0	No	6	0	0	2	2	0	0	2	1	1	1
1	998	Shanghai	3	2	1	26	168	65	23.03	1	1	1		2	1	1	2	3	23:30:00	0	07:10:00	5.5	2	2	0	3	0	1	1	0	0	3	1	0	1	3	3	Sickness	11	2	1	2	2	2	0	2	1	0	1
1	999	Shandong	2	2	2	20	160	50	19.5312	1	1	1		1			2	1	23:00:00	0	06:30:00	6.5	3	0	0	2	1	0	0	0	0	0	0	0	0	0	0	No	3	0	0	1	0	0	0	2	1	0	1
1	1000	Shandong	2	5	1	19	180	63	19.4444	1	1	1		2	1	1	3	1	23:00:00	0	07:00:00	6.5	3	1	0	2	1	0	0	0	0	0	0	1	0	0	0	No	6	1	0	1	1	1	0	2	1	0	1
1	1001	Shandong	2	2	1	18	181	85	25.9455	1	1	1		2	1	2	2	2	00:00:00	1	07:00:00	6.5	3	1	0	2	1	1	1	0	0	1	2	0	0	0	1	the dormitory environment affects sleep	6	1	1	1	0	1	0	2	1	1	1
2	1002	Shandong	2	2	1	18	180	68	20.9877	1	1	1		1			2	3	23:30:00	0	7:30	7.5	4	0	0	1	0	0	0	0	0	1	0	0	0	0	0	No	2	0	0	0	0	1	0	1	1	0	1
2	1003	Sichuan	2	2	2	18	160	48	18.75	1	1	1		1			3	3	00:00:00	0	7:30	7.5	4	1	0	2	1	2	0	0	0	0	1	1	1	0	0	No	5	1	1	0	0	1	0	2	1	0	1
1	1004	Shandong	2	5	2	19	172	70	23.6614	1	1	1		1			3	3	23:30:00	1	06:30:00	6.5	3	1	0	2	1	0	0	1	0	0	0	1	1	0	0	No	6	1	1	1	0	1	0	2	1	0	1
1	1005	Shandong	2	2	2	21	165	70	25.7117	1	1	1		1			2	3	23:30:00	1	06:30:00	5.5	2	1	0	2	2	2	3	1	1	0	0	3	1	0	0	No	9	1	2	2	1	1	0	2	1	1	1
1	1006	Sichuan	2	2	2	20	164	58	21.5645	7	1	1		1			3	3	00:00:00	0	07:00:00	6.5	3	1	0	2	1	0	0	0	0	0	0	1	0	1	1	taking time away from sleep for recreation	5	1	0	1	0	1	0	2	1	0	0
1	1007	Shandong	2	2	1	18	163	47	17.6898	1	1	1		1			3	3	23:30:00	2	06:35:00	6.5	3	2	0	2	2	1	0	0	1	0	0	1	0	0	0	No	8	2	2	1	0	1	0	2	1	1	0
2	1008	Shaanxi	3	2	1	25	185	81	23.6669	1	1	1		2	1	4	3	1	00:30:00	0	08:30:00	7.5	4	1	0	1	1	0	0	0	0	0	0	0	0	0	0	No	2	1	0	0	0	0	0	1	1	1	0
2	1009	Shandong	2	2	2	21	160	47	18.3594	1	1	1		1			2	3	23:00:00	0	7:50	7.5	4	1	0	1	1	0	1	0	0	0	1	1	1	0	0	No	3	1	0	0	0	1	0	1	1	0	0
2	1010	Sichuan	2	2	2	17	165	59	21.6713	1	1	1		1			3	3	00:00:00	0	7:40	7.5	4	1	0	3	1	1	0	0	0	0	0	2	3	0	1	the dormitory environment affects sleep	5	1	1	0	0	1	0	2	1	0	0
1	1011	Shandong	2	2	2	18	165	52	19.1001	1	1	1		1			3	3	23:30:00	1	06:30:00	5.5	2	1	0	3	3	1	0	0	0	0	0	2	1	0	0	No	9	1	1	2	1	1	0	3	1	1	0
1	1012	Shandong	2	2	1	18	192	68	18.4462	1	1	1		1			2	3	23:00:00	0	07:00:00	6.5	3	1	0	3	1	1	1	1	1	2	1	1	1	1	0	No	7	1	1	1	1	1	0	2	1	0	1
1	1013	Shandong	2	2	2	18	170	55	19.0311	1	1	1		1			2	3	23:00:00	1	6:00	6.5	3	1	0	1	1	0	1	0	0	0	0	0	0	0	0	No	5	1	1	1	0	1	0	1	1	0	1
1	1014	Shandong	2	2	2	19	164	51	18.9619	1	1	1		1			3	3	23:00:00	2	6:20	5.5	2	1	2	2	1	3	0	0	0	0	2	0	1	0	0	No	12	1	3	2	1	1	2	2	1	0	1
1	1015	Shandong	2	2	2	18	163	46	17.3134	1	1	1		2	1	1	2	3	00:30:00	0	06:30:00	5.5	2	0	0	0	0	0	0	0	0	0	0	0	0	0	0	No	2	0	0	2	0	0	0	0	1	1	1
1	1016	Shandong	2	2	1	18	180	85	26.2346	1	1	1		1			3	3	22:30:00	2	6:00	5.5	2	1	0	3	1	3	3	0	2	0	3	0	0	3	0	No	12	1	3	2	2	2	0	2	1	0	1
1	1017	Shanxi	3	2	1	23	175	67.5	22.0408	1	1	1		1			2	2	00:00:00	0	07:00:00	6.5	3	1	0	2	3	1	1	2	0	1	1	2	0	1	1	taking time away from sleep for recreation	7	1	1	1	0	1	0	3	1	1	1
1	1018	Shandong	2	2	1	21	183	93	27.7703	4	1	2	5	2	1	4	2	1	00:30:00	0	7:35	6.5	3	0	0	0	2	0	3	0	0	0	0	0	0	0	0	No	3	0	0	1	0	1	0	1	1	0	0
1	1019	Hebei	2	2	2	20	158	50	20.0288	1	1	1		1			3	3	00:20:00	0	7:20	6.5	3	1	0	0	0	0	0	0	0	0	0	0	0	0	0	No	2	1	0	1	0	0	0	0	1	0	1
1	1020	Beijing	2	2	2	19	165	71	26.079	1	1	1		1			3	1	23:30:00	2	07:00:00	6.5	3	1	0	3	2	0	0	0	0	0	0	1	0	0	0	No	7	1	1	1	0	1	0	3	0	1	0
2	1021	Jiangsu	1	2	2	17	174	83	27.4145	1	1	1		1			3	1	23:00:00	0	06:40:00	7.5	4	1	0	1	1	0	0	0	1	1	0	0	0	0	0	No	3	1	0	0	0	1	0	1	1	0	0
1	1022	Jiangsu	1	2	2	19	161	49	18.9036	1	1	1		1			3	1	22:30:00	1	06:30:00	6.5	3	1	0	3	1	1	2	0	0	0	0	0	0	0	0	No	7	1	1	1	1	1	0	2	1	0	1
1	1023	Jiangsu	1	2	2	16	170	46	15.917	1	1	1		1			3	1	22:30:00	0	06:30:00	6.5	3	1	0	0	0	0	0	0	0	0	0	0	0	0	0	No	3	1	0	1	1	0	0	0	0	1	0
1	1024	Shandong	2	2	2	18	168	55	19.487	1	1	1		1			3	1	23:30:00	2	6:25	6.5	3	2	0	2	1	2	2	0	0	0	0	2	0	0	0	No	8	2	2	1	0	1	0	2	0	1	0
1	1025	Shandong	3	2	2	24	167	40	14.3426	1	1	1		2	1	1	3	3	22:00	0	07:00:00	6.5	3	0	0	1	0	0	0	0	0	0	0	0	0	0	0	No	4	0	0	1	2	0	0	1	0	0	1
2	1026	Shandong	3	2	2	26	160.5	53	20.5743	1	1	2	1	2	1	1	3	3	00:00:00	3	08:00:00	7.5	4	1	0	1	1	2	1	3	0	0	0	1	0	0	1	stressed out state	6	1	3	0	0	1	0	1	0	1	0
1	1027	Jiangsu	1	2	2	16	160	65	25.3906	1	1	1		1			3	3	23:00:00	1	6:20	5.5	2	0	0	3	3	0	0	0	0	0	0	0	0	0	0	No	7	0	1	2	1	0	0	3	1	0	0
1	1028	Shandong	3	2	2	24	158	56	22.4323	1	1	1		1			3	3	00:00:00	1	7:30	6.5	3	2	0	1	1	1	1	0	0	1	1	0	2	2	0	No	6	2	1	1	0	1	0	1	0	0	1
2	1029	Shandong	3	2	1	23	178	70	22.0932	1	1	1		2	1	1	1	1	00:30:00	0	08:00:00	7.5	4	2	0	3	3	0	0	0	0	0	0	0	0	0	0	No	5	2	0	0	0	0	0	3	0	1	0
1	1030	Beijing	2	2	2	19	160	67	26.1719	1	1	1		1			1	3	00:00:00	0	07:00:00	6.5	3	2	0	2	2	0	0	0	0	0	0	0	1	0	0	No	6	2	0	1	0	1	0	2	1	0	1
2	1031	Shandong	3	2	2	24	156	58	23.833	1	1	1		1			2	3	22:30:00	0	7:20	7.5	4	0	0	3	1	0	0	1	3	0	0	0	1	0	0	No	3	0	0	0	0	1	0	2	0	0	1
1	1032	Shandong	3	2	2	25	163	48	18.0662	1	1	1		1			3	3	01:00:00	0	7:30	6.5	3	2	0	3	3	0	3	0	3	0	0	0	0	0	3	staying up late to work or study	7	2	0	1	0	1	0	3	0	0	1
2	1033	Shandong	3	2	2	24	182	60	18.1138	1	1	1		1			3	1	23:30:00	1	08:00:00	8.5	5	0	0	0	0	1	0	0	0	0	0	0	1	0	0	No	2	0	1	0	0	1	0	0	0	0	0
1	1034	Jiangsu	1	2	2	16	162	94	35.8177	1	1	1		1			1	3	22:30:00	0	6:20	6.5	3	0	0	0	0	0	0	0	0	0	0	0	0	0	0	No	2	0	0	1	1	0	0	0	1	0	0
1	1035	Shandong	3	2	2	29	162	62	23.6244	1	1	1		1			1	3	23:00:00	0	6:00	5.5	2	1	0	2	2	0	1	1	0	0	0	1	1	1	2	stressed out state	7	1	0	2	1	1	0	2	0	0	1
1	1036	Ningxia	2	2	2	25	165	64	23.5078	3	1	1		1			3	3	23:30:00	1	07:10:00	6.5	3	1	0	3	2	0	1	0	0	2	1	0	1	2	0	No	7	1	1	1	0	1	0	3	1	0	0
1	1037	Jiangsu	1	2	2	16	170	58	20.0692	1	1	1		1			4	3	23:00:00	2	6:20	5.5	2	2	0	2	0	2	0	1	0	0	0	1	1	0	0	No	9	2	2	2	1	1	0	1	0	1	0
1	1038	Ningxia	3	2	1	27	174	70	23.1206	3	1	2	3	1			2	3	01:00:00	3	07:00:00	3.5	1	3	0	2	2	3	2	3	2	2	2	0	2	0	3	repeated thoughts in bed	16	3	3	3	3	2	0	2	1	0	0
1	1039	Jiangsu	1	2	2	16	160	54	21.0938	1	1	1		1			1	3	00:00:00	0	06:30:00	5.5	2	1	0	3	1	3	2	2	1	0	2	2	1	2	2	the dormitory environment affects sleep	9	1	2	2	0	2	0	2	0	0	0
1	1040	Sichuan	2	2	2	19	164	98	36.4366	1	1	1		1			3	3	00:00:00	1	07:00:00	6.5	3	2	0	2	2	2	2	2	3	3	1	2	1	0	0	No	9	2	2	1	0	2	0	2	1	0	0
1	1041	Jiangsu	1	2	2	17	163	68	25.5937	1	1	1		1			2	1	23:30:00	2	06:40:00	5.5	2	2	0	2	3	3	2	2	2	2	2	2	2	2	2	No	13	2	3	2	1	2	0	3	0	0	0
1	1042	Jiangsu	1	2	1	17	168	40	14.1723	1	1	1		1			3	3	22:00	0	07:00:00	4.5	1	2	0	1	2	1	3	2	3	2	2	2	2	1	2	No	14	2	1	3	3	3	0	2	1	1	1
1	1043	Ningxia	3	2	2	26	163	40	15.0551	1	1	1		1			3	3	00:00:00	0	07:00:00	6.5	3	1	0	3	1	1	1	1	0	0	0	2	2	1	0	No	6	1	1	1	0	1	0	2	0	1	0
1	1044	Jiangsu	1	2	2	16	158	55	22.0317	1	1	1		1			2	1	23:00:00	2	6:20	5.5	2	2	0	1	1	3	0	0	0	0	2	0	0	0	0	No	10	2	3	2	1	1	0	1	0	0	0
1	1045	Shandong	2	2	1	18	183	75	22.3954	1	1	1		2	1	3	1	1	23:00:00	0	07:00:00	6.5	3	0	0	0	1	0	0	0	0	0	1	0	0	0	0	No	4	0	0	1	1	1	0	1	1	0	0
1	1046	Shandong	2	2	2	18	155	89	37.0447	1	1	1		1			3	3	23:00:00	1	06:30:00	6.5	3	1	0	2	1	2	1	0	0	3	0	0	2	1	0	No	7	1	2	1	0	1	0	2	1	0	1
1	1047	Jiangsu	1	2	2	16	163	55	20.7008	1	1	1		1			2	1	23:10:00	1	06:40:00	5.5	2	1	0	1	1	0	1	0	0	0	1	0	0	0	0	No	8	1	1	2	2	1	0	1	1	0	0
1	1048	Shandong	2	2	1	19	180	65	20.0617	1	1	1		1			3	2	01:00:00	2	07:00:00	4.5	1	1	0	2	1	2	0	2	1	0	0	0	0	0	0	No	10	1	2	3	1	1	0	2	1	1	1
1	1049	Shandong	2	2	2	21	169	53	18.5568	1	1	1		1			2	3	00:00:00	0	07:00:00	6.5	3	0	0	0	0	0	0	1	1	0	1	1	0	0	0	No	2	0	0	1	0	1	0	0	1	1	1
1	1050	Shandong	2	2	2	20	167	55	19.721	1	1	1		1			3	3	00:00:00	1	08:00:00	6.5	3	1	0	2	0	1	2	0	0	0	0	0	0	0	0	No	6	1	1	1	1	1	0	1	1	0	0
1	1051	Shandong	2	2	2	19	162	54	20.5761	1	1	1		1			2	3	23:40	3	06:30:00	5.5	2	1	0	2	1	2	2	0	0	0	0	0	2	2	0	No	10	1	3	2	1	1	0	2	1	1	0
2	1052	Sichuan	3	2	1	20	163	65	24.4646	1	1	1		1			3	3	22:30:00	1	07:10:00	7.5	4	0	0	0	0	0	0	0	0	0	0	0	1	0	0	No	2	0	1	0	0	1	0	0	1	0	0
1	1053	Jiangsu	1	2	2	16	170	60	20.7612	1	1	1		1			1	3	22:30:00	0	6:20	5.5	2	0	0	3	0	0	3	0	0	0	0	3	0	0	0	No	7	0	0	2	2	1	0	2	0	0	1
1	1054	Jiangsu	1	2	2	16	165	60	22.0386	1	1	1		1			2	2	1:40	2	06:30:00	5.5	2	2	0	3	3	3	0	1	0	0	0	0	0	0	0	No	11	2	3	2	0	1	0	3	1	1	1
1	1055	Shandong	2	2	1	20	177	60	19.1516	1	1	2	5	2	1	1	1	1	23:00:00	2	06:40:00	5.5	2	2	0	2	1	2	0	0	0	0	0	0	0	0	0	No	10	2	2	2	2	0	0	2	1	1	0
1	1056	Ningxia	2	2	2	27	157	90	36.5126	1	1	1		1			2	3	22:30:00	2	07:00:00	5.5	2	2	1	3	3	3	3	1	0	0	0	0	1	3	0	No	14	2	3	2	2	1	1	3	1	0	0
1	1057	Jiangsu	1	2	2	16	170	57.5	19.8962	1	1	1		1			1	1	23:00:00	1	06:30:00	5.5	2	2	0	3	2	2	2	1	0	1	0	0	0	0	0	No	12	2	2	2	2	1	0	3	1	0	1
1	1058	Ningxia	3	2	2	26	162	50	19.052	3	1	1		1			1	3	23:30:00	2	07:00:00	5.5	2	2	2	2	1	2	3	2	0	0	1	0	3	0	0	No	13	2	2	2	2	1	2	2	0	0	1
1	1059	Jiangsu	1	2	2	20	165	59	21.6713	1	1	1		2	2	1	2	1	1:50	0	06:45:00	5.5	2	2	0	2	2	0	2	0	1	0	1	1	2	0	0	No	7	2	0	2	0	1	0	2	1	1	1
1	1060	Neimenggu	2	2	2	20	168	68	24.093	1	1	1		1			3	3	23:40	0	06:40:00	6.5	3	0	0	2	1	0	0	1	0	0	1	3	1	0	0	No	4	0	0	1	0	1	0	2	0	1	0
1	1061	Shandong	2	2	1	18	178	63	19.8839	1	1	1		1			3	3	00:30:00	3	06:37:00	5.5	2	2	0	3	3	2	0	1	0	0	0	0	0	0	0	No	11	2	3	2	0	1	0	3	1	0	0
1	1062	Ningxia	3	2	1	26	172	65	21.9713	3	1	1		1			1	1	00:30:00	2	07:00:00	6.5	3	2	0	2	1	3	0	0	0	0	1	0	0	0	0	No	9	2	3	1	0	1	0	2	1	1	0
1	1063	Shandong	2	2	2	18	165	64	23.5078	1	1	1		1			2	3	22:30:00	0	6:00	6.5	3	0	0	0	0	0	0	0	0	0	0	0	0	0	0	No	1	0	0	1	0	0	0	0	1	1	1
1	1064	Jiangsu	1	2	2	16	160	49	19.1406	1	1	1		1			2	3	23:00:00	1	06:30:00	6.5	3	2	0	3	1	1	0	1	0	0	0	0	1	0	0	No	7	2	1	1	0	1	0	2	0	0	0
1	1065	Shandong	2	2	1	20	173	90	30.0712	1	1	2	6	1			2	3	23:00:00	1	6:20	6.5	3	1	0	0	1	2	0	0	0	3	0	0	0	0	0	No	6	1	2	1	0	1	0	1	1	0	0
1	1066	Shandong	2	2	1	19	163	51	19.1953	1	1	2	1	1			3	3	23:56:00	2	6:50	6.5	3	3	2	3	3	3	1	0	0	3	3	0	0	0	3	repeated thoughts in bed	14	3	3	1	0	2	2	3	1	1	1
2	1067	Jiangsu	1	2	2	17	171	61	20.8611	1	1	1		1			3	3	22:30:00	1	06:30:00	7.5	4	0	0	3	2	0	2	1	0	0	2	2	1	0	0	No	5	0	1	0	0	1	0	3	1	0	1
1	1068	Shandong	2	2	2	19	166	60	21.7738	1	1	1		1			2	3	01:00:00	2	06:30:00	4.5	1	2	0	3	1	3	0	0	3	0	3	0	2	0	0	No	12	2	3	3	1	1	0	2	1	0	0
1	1069	Jiangsu	1	2	2	17	172	65	21.9713	1	1	1		1			2	3	23:00:00	1	06:30:00	3	1	2	0	1	1	0	0	1	0	0	0	0	0	0	0	No	11	2	1	3	3	1	0	1	1	1	0
1	1070	Anhui	2	2	1	19	170	65	22.4913	1	1	1		2	1	1	3	3	00:00:00	0	06:30:00	6.5	3	1	0	0	0	0	0	0	0	0	0	0	0	0	0	No	2	1	0	1	0	0	0	0	1	0	1
1	1071	Shandong	2	2	1	18	174	90	29.7265	1	1	1		1			2	3	23:30:00	1	06:30:00	5.5	2	2	0	3	1	0	0	0	0	0	3	0	0	0	0	No	9	2	1	2	1	1	0	2	1	0	0
2	1072	Shandong	2	2	1	21	185	78	22.7904	1	1	1		2	2	4	3	3	23:00:00	0	07:00:00	7.5	4	0	0	3	0	1	0	0	0	1	0	3	1	0	0	No	4	0	1	0	0	1	0	2	0	1	0
1	1073	Shandong	2	2	1	20	170	52	17.9931	1	1	1		1			2	3	23:00:00	1	06:30:00	6.5	3	3	0	3	3	2	2	0	0	0	3	0	2	0	0	No	10	3	2	1	0	1	0	3	0	0	1
1	1074	Shandong	2	2	1	20	180	100	30.8642	1	1	1		1			2	3	22:30:00	1	06:30:00	6.5	3	2	0	3	2	2	0	0	0	2	1	0	2	0	1	Sickness	10	2	2	1	1	1	0	3	0	0	0
1	1075	Ningxia	3	2	2	26	168	70	24.8016	3	1	1		1			2	3	00:00:00	0	07:00:00	6.5	3	0	0	0	1	0	0	0	0	0	0	0	0	0	0	No	2	0	0	1	0	0	0	1	1	0	1
1	1076	Shandong	3	2	2	25	159	46	18.1955	1	1	1		1			3	3	23:30:00	1	7:30	6.5	3	0	0	1	1	1	0	0	0	0	0	0	0	0	0	No	4	0	1	1	1	0	0	1	1	0	0
1	1077	Jiangsu	1	2	1	16	180	60	18.5185	1	1	1		1			2	3	23:00:00	0	6:10	6.5	3	2	0	3	1	1	1	0	0	0	0	0	0	0	0	No	7	2	1	1	0	1	0	2	0	0	1
1	1078	Beijing	2	2	2	19	158	52	20.83	6	1	1		1			2	3	00:00:00	1	08:30:00	6.5	3	2	0	2	1	2	0	1	0	1	3	0	0	0	0	No	9	2	2	1	1	1	0	2	1	0	1
1	1079	Jiangsu	1	2	1	21	185	90	26.2966	1	1	1		1			2	3	23:00:00	0	07:00:00	6.5	3	0	0	1	0	0	0	0	0	0	0	0	0	0	0	No	3	0	0	1	1	0	0	1	0	0	0
1	1080	Shandong	3	2	1	24	183	100	29.8606	1	1	1		1			3	1	00:00:00	0	07:00:00	6.5	3	2	0	3	1	0	2	1	0	0	0	0	0	0	2	repeated thoughts in bed	6	2	0	1	0	1	0	2	0	0	1
2	1081	Sichuan	2	2	1	19	172	71	23.9995	1	1	1		1			1	3	23:30:00	0	7:30	7.5	4	1	0	0	0	0	0	0	0	0	0	0	0	0	0	No	1	1	0	0	0	0	0	0	0	1	0
1	1082	Shaanxi	2	2	1	20	167	57	20.4382	1	1	1		1			3	1	00:00:00	1	7:30	6.5	3	1	0	2	2	2	0	0	0	0	3	0	2	0	0	No	7	1	2	1	0	1	0	2	0	0	1
1	1083	Jiangsu	3	2	2	29	160	62	24.2188	1	1	1		1			3	2	23:30:00	0	6:00	6.5	3	0	0	0	0	0	0	0	0	0	0	0	0	0	0	No	1	0	0	1	0	0	0	0	0	1	0
2	1084	Guangdong	2	2	1	18	178	75	23.6713	1	1	1		1			2	1	23:50:00	1	08:30:00	7.5	4	1	0	0	0	0	0	0	0	0	0	0	0	0	0	No	2	1	1	0	0	0	0	0	0	0	1
1	1085	Jiangsu	1	2	2	17	160	50	19.5312	1	1	1		1			3	3	22:30:00	0	7:30	5.5	2	2	0	1	1	3	0	0	0	0	0	0	0	0	0	No	10	2	2	2	3	0	0	1	1	0	0
1	1086	Guangdong	2	2	1	18	173	58	19.3792	1	1	1		2	1	1	3	3	1:30	0	10:30:00	5.5	2	1	0	3	3	0	0	0	0	0	3	2	0	2	0	No	10	1	0	2	3	1	0	3	1	0	0
1	1087	Sichuan	2	2	2	19	165	53	19.4674	1	1	1		1			2	3	01:00:00	0	7:30	6.5	3	0	0	0	0	0	0	0	0	0	0	1	0	0	0	No	2	0	0	1	0	1	0	0	1	0	1
2	1088	Macau	2	2	1	19	173	83	27.7323	1	1	2	3	2	3	3	3	1	23:30:00	0	08:00:00	7.5	4	0	0	1	1	0	0	0	0	1	0	0	0	0	0	No	2	0	0	0	0	1	0	1	1	0	0
2	1089	Macau	1	2	1	19	168	60	21.2585	1	1	1		1			2	1	00:30:00	1	10:00:00	9.5	6	1	0	2	1	2	0	0	0	0	3	0	2	0	2	the dormitory environment affects sleep	6	1	2	0	0	1	0	2	0	0	0
2	1090	Jiangsu	2	2	2	18	166	70	25.4028	1	1	1		1			2	3	00:00:00	0	08:00:00	7.5	4	0	0	2	1	0	0	0	0	0	0	0	0	0	0	No	2	0	0	0	0	0	0	2	1	0	1
1	1091	Jiangsu	1	2	2	16	164	57	21.1927	1	1	1		1			3	1	23:00:00	0	06:30:00	4.5	1	1	0	1	1	0	0	1	0	0	0	1	0	0	0	No	9	1	0	3	3	1	0	1	0	0	0
1	1092	Sichuan	2	2	2	18	165	56	20.5693	1	1	1		2	2	1	2	1	01:00:00	0	7:20	5.5	2	1	0	3	1	0	0	0	0	0	0	0	0	0	0	No	5	1	0	2	0	0	0	2	1	1	1
2	1093	Sichuan	2	2	2	18	162	58	22.1003	1	1	1		1			2	3	23:30:00	1	07:10:00	7.5	4	1	0	2	1	0	2	2	0	0	2	0	0	0	0	No	5	1	1	0	0	1	0	2	1	0	1
1	1094	Jiangsu	2	2	2	16	165	65	23.8751	1	1	1		1			2	1	20:00:00	1	06:30:00	6.5	3	1	0	3	1	2	0	2	0	0	3	0	0	3	0	No	10	1	2	1	3	1	0	2	1	0	0
1	1095	Shandong	2	2	1	18	188	98	27.7275	1	1	1		1			3	3	23:30:00	0	6:00	6.5	3	2	0	3	2	1	1	0	0	0	0	0	1	0	1	No	8	2	1	1	0	1	0	3	1	1	1
1	1096	Jiangsu	1	2	2	16	170	58	20.0692	1	1	1		1			2	3	23:30:00	0	06:30:00	6.5	3	1	0	1	1	1	0	0	0	0	0	1	0	1	0	No	5	1	1	1	0	1	0	1	0	0	0
1	1097	Jiangsu	1	2	2	17	170	52.5	18.1661	1	1	1		1			2	3	00:00:00	1	6:20	4.5	1	3	0	3	2	2	3	3	3	0	2	2	2	0	3	the dormitory environment affects sleep	15	3	2	3	2	2	0	3	0	0	0
1	1098	Jiangsu	1	2	2	17	165	50	18.3655	1	1	1		1			3	3	23:00:00	0	06:40:00	6.5	3	1	0	1	1	1	0	0	0	0	0	0	0	0	0	No	4	1	1	1	0	0	0	1	1	1	1
1	1099	Jiangsu	1	2	1	21	180	91	28.0864	1	1	1		2	2	2	2	3	00:00:00	1	7:30	5.5	2	2	0	3	1	0	1	0	0	0	3	0	1	0	0	No	10	2	1	2	2	1	0	2	1	1	0
1	1100	Jiangsu	1	2	2	16	164	58	21.5645	1	1	1		1			2	1	23:00:00	1	06:30:00	6.5	3	0	0	0	0	0	1	0	0	0	0	0	0	0	0	No	3	0	1	1	0	1	0	0	0	1	0
1	1101	Shandong	2	2	2	21	158	55	22.0317	6	1	1		1			2	3	00:00:00	0	7:20	6.5	3	0	0	1	1	0	0	0	0	0	0	0	0	0	0	No	2	0	0	1	0	0	0	1	1	1	0
1	1102	Jiangsu	1	2	2	16	168	61	21.6128	1	1	1		1			2	2	22:30:00	1	6:20	6.5	3	1	0	1	0	0	0	0	0	0	0	0	0	0	0	No	5	1	1	1	1	0	0	1	1	0	0
1	1103	Xinjiang	2	2	1	21	173	68	22.7204	1	1	1		1			1	1	02:00:00	0	07:45:00	4.5	1	1	0	2	1	1	0	0	0	0	2	0	0	0	0	No	9	1	1	3	1	1	0	2	0	0	1
1	1104	Xinjiang	2	2	2	21	164	54	20.0773	1	1	1		1			2	2	23:55	2	7:30	6.5	3	2	0	3	3	2	3	0	0	0	1	1	2	0	0	No	9	2	2	1	0	1	0	3	0	0	1
1	1105	Xinjiang	2	2	2	20	166	56	20.3223	1	1	1		1			3	3	01:00:00	0	7:30	5.5	2	0	0	0	0	0	0	0	0	2	0	0	0	0	0	No	3	0	0	2	0	1	0	0	0	0	1
1	1106	Xinjiang	2	2	1	20	170	80	27.6817	1	1	1		1			2	3	01:00:00	0	08:30:00	6.5	3	1	0	0	1	0	0	0	0	0	0	0	0	0	0	No	3	1	0	1	0	0	0	1	0	0	0
1	1107	Xinjiang	2	2	1	20	165	70	25.7117	1	1	1		1			2	2	2:30	0	08:00:00	5.5	2	2	0	3	3	1	0	0	0	0	3	0	3	0	0	No	9	2	1	2	0	1	0	3	0	1	1
1	1108	Xinjiang	2	2	2	22	165	52	19.1001	1	1	1		1			2	3	1:30	0	7:30	5.5	2	1	0	2	2	0	0	0	0	0	0	0	0	0	0	No	5	1	0	2	0	0	0	2	1	1	1
2	1109	Xinjiang	2	2	1	23	175	65	21.2245	1	1	1		1			2	3	00:30:00	1	8:20	7.5	4	1	0	2	1	2	0	0	0	0	2	0	0	0	0	No	6	1	2	0	0	1	0	2	0	0	0
1	1110	Xinjiang	2	2	2	20	155	46	19.1467	1	1	1		1			2	3	2:00	0	7:36	5.5	2	1	0	3	1	0	0	0	0	0	0	0	2	0	0	No	6	1	0	2	0	1	0	2	0	0	1
1	1111	Jiangsu	1	2	1	20	176	80	25.8264	1	1	1		1			2	1	02:00:00	1	9:30	4.5	1	2	0	2	1	0	0	2	0	0	0	0	2	0	0	No	12	2	1	3	3	1	0	2	0	0	1
2	1112	Xinjiang	2	2	2	20	161	47	18.132	1	1	1		1			2	1	00:30:00	0	8:50	7.5	4	0	0	1	1	0	0	0	0	0	0	0	0	0	0	No	1	0	0	0	0	0	0	1	1	0	1
2	1113	Xinjiang	2	2	2	20	158	55	22.0317	1	1	1		1			2	1	00:30:00	1	7:50	7.5	4	1	0	1	1	1	0	0	0	0	0	0	0	0	0	No	3	1	1	0	0	0	0	1	0	0	0
1	1114	Xinjiang	2	2	2	22	163	54	20.3244	1	1	1		1			3	3	23:30:00	0	08:40:00	6.5	3	1	0	1	1	0	1	0	0	0	0	0	0	0	0	No	6	1	0	1	2	1	0	1	1	0	1
1	1115	Xinjiang	2	2	2	21	160	70	27.3438	1	1	1		1			2	1	2:30	3	9:00	6.5	3	1	0	0	1	0	0	0	1	1	1	1	1	0	0	No	6	1	2	1	0	1	0	1	1	0	1
1	1116	Xinjiang	2	2	1	21	170	47	16.263	1	1	1		1			3	3	1:30	0	08:30:00	6.5	3	2	0	2	1	0	1	1	0	0	1	0	0	1	0	No	6	2	0	1	0	1	0	2	1	1	1
1	1117	Xinjiang	2	2	1	21	170	80	27.6817	1	2	1		1			1	2	00:30:00	0	9:00	5.5	2	0	0	0	0	0	0	0	0	1	0	0	0	0	0	No	5	0	0	2	2	1	0	0	0	1	0
1	1118	Xinjiang	2	2	1	22	175	75	24.4898	1	1	1		1			1	3	02:00:00	1	08:00:00	5.5	2	1	0	1	1	0	0	1	0	0	0	0	0	0	0	No	6	1	1	2	0	1	0	1	0	1	1
1	1119	Xinjiang	2	2	2	21	163	50	18.8189	1	1	1		1			2	1	00:30:00	0	7:50	6.5	3	1	0	3	1	1	0	0	0	0	0	0	1	0	0	No	6	1	1	1	0	1	0	2	1	0	1
1	1120	Xinjiang	2	2	1	23	183	88	26.2773	7	1	1		1			2	3	00:40:00	1	7:30	5.5	2	0	0	0	0	0	0	0	0	0	0	0	0	0	0	No	4	0	1	2	1	0	0	0	0	0	1
2	1121	Xinjiang	2	2	2	22	165	52.5	19.2837	6	1	1		1			3	2	01:00:00	0	7:40	7.5	4	0	0	3	1	1	0	1	0	0	1	0	0	0	1	staying up late to work or study	4	0	1	0	0	1	0	2	1	0	1
1	1122	Xinjiang	2	2	2	21	165	55	20.202	1	1	1		1			3	3	00:40:00	1	08:30:00	6.5	3	1	0	1	1	1	1	1	0	0	1	1	0	0	0	No	6	1	1	1	1	1	0	1	0	0	0
1	1123	Xinjiang	2	2	2	21	150	47	20.8889	7	1	1		1			2	1	00:30:00	2	07:45:00	6.5	3	2	0	2	2	2	0	0	0	0	1	1	1	0	0	No	8	2	2	1	0	1	0	2	0	0	1
1	1124	Xinjiang	2	2	2	21	160	45	17.5781	1	1	1		1			3	1	22:30:00	3	7:50	5.5	2	2	0	2	0	0	1	0	0	0	0	0	0	0	0	No	11	2	2	2	3	1	0	1	1	0	1
1	1125	Xinjiang	2	2	2	22	165	66	24.2424	1	1	1		1			2	3	02:00:00	3	9:00	5.5	2	2	0	3	2	2	0	1	0	0	0	0	0	0	0	No	12	2	3	2	1	1	0	3	0	1	0
2	1126	Jiangsu	1	2	1	16	178	65	20.5151	7	1	1		1			2	1	21:00:00	1	06:40:00	7.5	4	1	0	1	0	0	0	0	0	0	0	0	0	0	0	No	4	1	1	0	1	0	0	1	0	0	0
2	1127	Shandong	2	2	1	21	179	73	22.7833	1	1	1		1			1	3	01:00:00	0	9:00	7.5	4	0	0	0	0	0	0	0	0	1	0	0	0	0	0	No	1	0	0	0	0	1	0	0	1	0	1
1	1128	Xinjiang	2	2	1	22	170	79	27.3356	1	1	1		1			3	1	1:30	0	8:50	6.5	3	1	0	1	1	0	0	0	0	1	1	0	0	0	0	No	4	1	0	1	0	1	0	1	1	1	1
2	1129	Gansu	2	2	2	22	160	56	21.875	1	1	1		1			1	1	1:30	0	9:00	7.5	4	1	0	1	1	0	0	0	0	0	0	1	0	0	0	No	3	1	0	0	0	1	0	1	1	1	0
1	1130	Chongqing	2	2	1	22	170	47	16.263	1	1	1		1			2	3	01:00:00	0	03:00:00	3	1	0	0	0	0	0	0	0	0	0	0	0	0	0	0	No	3	0	0	3	0	0	0	0	1	0	0
1	1131	Xinjiang	2	2	2	21	172	78	26.3656	1	1	1		2	1	1	2	3	02:00:00	1	08:40:00	5.5	2	2	0	2	1	1	0	0	0	1	1	0	0	0	1	staying up late to work or study	9	2	1	2	1	1	0	2	1	1	1
1	1132	Xinjiang	2	2	1	22	182	81	24.4536	1	1	1		2	1	1	4	1	00:30:00	0	08:00:00	6.5	3	0	0	0	0	0	0	0	0	1	0	0	0	0	0	No	2	0	0	1	0	1	0	0	0	0	1
1	1133	Xinjiang	2	2	1	22	165	70	25.7117	1	1	1		1			3	3	01:00:00	1	08:30:00	6.5	3	2	0	1	0	1	0	0	0	0	1	0	0	0	0	No	6	2	1	1	0	1	0	1	0	1	1
1	1134	Xinjiang	2	2	2	22	155	49	20.3954	1	1	1		1			1	3	01:00:00	0	08:40:00	6.5	3	1	0	2	2	2	1	2	0	0	0	0	2	2	2	staying up late to work or study	6	1	1	1	0	1	0	2	1	1	1
1	1135	Xinjiang	2	2	1	21	181	85	25.9455	1	1	2	6	1			3	2	01:00:00	1	7:40	6.5	3	1	0	1	1	1	2	0	0	0	0	0	0	0	0	No	5	1	1	1	0	1	0	1	0	0	0
1	1136	Xinjiang	2	2	2	21	178	55	17.3589	1	1	1		1			2	1	2:00	0	8:50	6.5	3	0	0	3	3	0	0	0	0	0	1	0	0	0	2	staying up late to work or study	5	0	0	1	0	1	0	3	0	0	1
1	1137	Xinjiang	2	2	2	21	155	47	19.563	1	1	1		1			2	3	1:30	1	9:00	6.5	3	1	0	3	2	1	0	0	0	0	0	0	1	0	0	No	7	1	1	1	0	1	0	3	0	0	1
1	1138	Xinjiang	2	2	2	22	165	54	19.8347	1	1	1		1			2	1	00:30:00	1	08:00:00	6.5	3	1	0	0	0	0	0	0	0	0	0	1	0	0	0	No	4	1	1	1	0	1	0	0	0	0	0
1	1139	Xinjiang	2	2	2	20	158	54	21.6311	1	1	1		1			2	3	1:30	0	08:50:00	6.5	3	0	0	3	1	0	0	0	0	0	1	0	0	0	1	mood problems	4	0	0	1	0	1	0	2	0	1	1
1	1140	Shandong	2	2	2	18	168	80	28.3447	1	1	1		1			2	3	00:00:00	0	6:20	6.5	3	0	0	0	0	0	0	0	0	2	0	0	0	0	0	No	2	0	0	1	0	1	0	0	1	1	1
1	1141	Xinjiang	2	2	2	23	161	48	18.5178	7	1	1		1			2	3	1:30	1	8:50	4.5	1	1	0	2	3	1	0	1	0	1	2	0	1	0	0	No	12	1	1	3	3	1	0	3	0	0	1
2	1142	Sichuan	2	2	1	18	175	62	20.2449	1	1	1		1			2	3	23:30:00	0	7:30	7.5	4	0	0	0	0	0	0	0	0	0	0	0	0	0	0	No	0	0	0	0	0	0	0	0	1	0	1
1	1143	Jiangsu	1	2	2	16	168	62	21.9671	1	1	1		1			2	3	23:30:00	1	6:20	4.5	1	1	0	2	1	2	0	0	0	1	0	0	0	0	2	the dormitory environment affects sleep	11	1	2	3	2	1	0	2	1	0	0
2	1144	Jiangsu	1	2	2	16	164	50	18.5901	1	1	1		1			2	3	22:30:00	0	06:40:00	7.5	4	0	0	2	0	0	0	0	0	0	0	0	0	0	0	No	1	0	0	0	0	0	0	1	1	0	0
2	1145	Xinjiang	2	2	1	22	180	60	18.5185	1	1	1		1			2	1	00:00:00	0	7:30	10	6	0	0	0	0	0	0	0	0	0	0	0	0	0	0	No	0	0	0	0	0	0	0	0	0	0	1
2	1146	Xinjiang	2	2	2	21	155	65	27.0552	1	1	1		1			2	1	01:00:00	0	08:00:00	7.5	4	0	0	2	1	0	1	1	0	0	0	0	0	0	0	No	3	0	0	0	0	1	0	2	1	0	1
1	1147	Xinjiang	2	2	2	21	165	60	22.0386	1	1	1		1			1	1	1:20	0	08:10:00	6.5	3	1	0	1	1	1	0	0	0	0	0	0	0	0	0	No	4	1	1	1	0	0	0	1	0	0	0
1	1148	Xinjiang	2	2	1	20	168	90	31.8878	1	1	1		1			2	3	2:00	2	08:00:00	4.5	1	2	0	3	1	3	1	0	0	0	3	0	0	0	0	No	12	2	3	3	1	1	0	2	0	0	1
1	1149	Jiangsu	1	2	2	16	173	52	17.3745	1	1	1		1			3	3	22:00	0	06:20:00	6.5	3	1	0	2	1	1	1	0	0	0	2	0	0	0	0	No	7	1	1	1	1	1	0	2	0	0	0
1	1150	Xinjiang	2	2	1	22	172	80	27.0416	1	1	2	1	1			2	3	02:00:00	2	9:20	6.5	3	2	0	3	3	3	0	0	0	2	2	0	0	0	0	No	10	2	3	1	0	1	0	3	0	0	0
1	1151	Xinjiang	2	2	2	21	170	62	21.4533	1	1	1		1			3	3	1:30	0	08:40:00	5.5	2	1	0	2	1	0	0	0	0	0	0	0	0	0	0	No	6	1	0	2	1	0	0	2	1	0	0
1	1152	Xinjiang	2	2	2	22	170	52	17.9931	7	1	1		1			1	3	01:00:00	2	9:00	6.5	3	1	0	0	0	1	0	0	0	0	0	0	0	0	0	No	5	1	2	1	1	0	0	0	0	1	1
1	1153	Xinjiang	2	2	2	22	160	50	19.5312	1	1	1		1			3	3	00:30:00	2	08:30:00	6.5	3	3	0	3	3	3	2	0	0	0	0	0	3	3	0	No	12	3	3	1	1	1	0	3	1	1	1
1	1154	Xinjiang	2	2	1	21	184	78	23.0388	1	1	1		1			2	3	01:00:00	1	9:00	6.5	3	1	0	2	2	2	0	0	0	0	0	0	0	0	2	the dormitory environment affects sleep	8	1	2	1	1	1	0	2	1	1	0
1	1155	Xinjiang	2	2	2	21	166	58	21.048	7	1	1		1			2	3	1:30	1	9:00	6.5	3	1	0	3	3	1	0	0	0	1	3	0	1	0	3	staying up late to work or study	7	1	1	1	0	1	0	3	1	0	1
1	1156	Xinjiang	2	2	2	22	164	54	20.0773	7	1	1		1			2	3	02:00:00	1	9:00	6.5	3	0	0	3	3	3	0	1	0	0	3	0	0	0	3	staying up late to work or study	7	0	2	1	0	1	0	3	0	1	1
1	1157	Xinjiang	2	2	2	22	165	48	17.6309	7	1	1		1			1	3	00:00:00	0	08:30:00	6.5	3	0	0	1	0	0	0	1	0	0	0	0	0	0	0	No	4	0	0	1	1	1	0	1	1	0	1
1	1158	Shandong	2	2	2	19	158	52	20.83	1	1	1		1			2	3	23:00:00	2	07:00:00	5.5	2	2	0	2	1	3	2	3	0	0	0	2	0	0	0	No	12	2	3	2	2	1	0	2	0	0	0
1	1159	Liaoning	2	2	2	19	168	53	18.7783	1	1	1		2	2	5	3	1	1:30	3	9:00	6.5	3	1	0	2	1	0	0	0	0	0	0	1	0	0	0	No	7	1	2	1	0	1	0	2	1	1	1
2	1160	Jilin	2	2	2	19	164.5	52.8	19.512	1	1	1		1			3	3	23:30:00	0	9:00	7.5	4	0	0	0	0	0	1	0	0	0	2	0	0	0	0	No	2	0	0	0	1	1	0	0	0	0	1
1	1161	Shandong	2	2	2	19	165	50	18.3655	1	1	1		1			3	3	00:00:00	0	07:00:00	6.5	3	1	0	2	1	0	0	0	0	0	1	0	0	0	0	No	5	1	0	1	0	1	0	2	1	1	1
1	1162	Hebei	2	2	1	18	170	55	19.0311	1	1	1		2	2	1	2	1	00:00:00	1	7:20	6.5	3	1	0	1	1	1	0	0	0	0	1	1	0	0	0	No	5	1	1	1	0	1	0	1	1	1	1
1	1163	Shandong	2	2	2	18	163	47	17.6898	1	1	1		1			2	1	23:00:00	2	6:20	6.5	3	0	0	0	0	0	0	0	0	0	0	0	0	0	0	No	2	0	1	1	0	0	0	0	1	0	0
1	1164	Shandong	2	2	2	18	170	56	19.3772	1	1	1		1			3	2	22:50:00	1	6:10	6.5	3	1	0	2	1	1	1	0	0	1	1	1	1	0	2	the dormitory environment affects sleep	6	1	1	1	0	1	0	2	1	0	1
1	1165	Shandong	2	2	2	20	160	56.5	22.0703	1	1	1		1			2	2	23:30:00	1	07:00:00	6.5	3	0	0	0	0	0	0	0	0	0	0	0	0	0	0	No	2	0	1	1	0	0	0	0	1	0	0
1	1166	Shandong	2	2	2	17	158	42	16.8242	1	1	1		1			2	3	23:30:00	0	06:40:00	6.5	3	1	0	0	0	0	0	0	0	0	0	0	0	0	0	No	2	1	0	1	0	0	0	0	1	0	1
1	1167	Shandong	2	2	1	18	170	66	22.8374	1	1	1		1			2	1	01:00:00	3	6:00	4.5	1	1	0	3	3	3	0	0	0	0	0	0	1	0	0	No	11	1	3	3	0	1	0	3	1	1	0
1	1168	Shandong	2	2	1	19	178	74	23.3556	1	1	1		2	1	2	3	3	23:00:00	2	06:30:00	6.5	3	2	0	2	1	2	1	0	0	0	0	0	3	0	0	No	8	2	2	1	0	1	0	2	0	0	1
1	1169	Shandong	2	2	2	18	167	58	20.7967	1	1	1		1			1	3	23:30:00	1	6:00	6.5	3	1	0	1	1	0	2	0	0	0	2	0	0	0	0	No	5	1	1	1	0	1	0	1	1	0	1
2	1170	Shandong	2	2	2	18	163	52	19.5717	1	1	1		1			3	1	22:50:00	1	6:00	7.5	4	0	0	0	0	1	1	0	0	0	1	0	0	0	0	No	2	0	1	0	0	1	0	0	1	0	0
1	1171	Shandong	2	2	1	18	161	84	32.4062	1	1	1		2	1	1	2	3	22:40:00	1	06:30:00	5.5	2	1	0	2	1	1	2	0	1	2	2	1	0	0	0	No	9	1	1	2	2	1	0	2	1	0	1
1	1172	Shandong	2	2	2	19	165	70	25.7117	1	1	1		2	1	3	2	1	00:00:00	0	7:30	6.5	3	1	0	1	0	0	0	0	0	0	0	0	0	0	0	No	3	1	0	1	0	0	0	1	1	1	1
1	1173	Shandong	2	2	2	19	162	58	22.1003	1	1	1		1			2	1	23:50:00	0	6:50	6.5	3	1	0	1	0	0	0	0	0	0	0	0	0	0	0	No	3	1	0	1	0	0	0	1	1	0	0
1	1174	Shandong	2	2	1	19	185	65	18.992	1	1	1		2	1	1	3	1	00:00:00	1	7:30	5.5	2	1	0	1	1	1	1	0	0	0	0	0	0	0	0	No	8	1	1	2	2	1	0	1	1	1	0
1	1175	Shandong	2	2	2	18	164	56	20.8209	1	1	1		1			1	3	23:00:00	0	6:00	6.5	3	1	0	2	1	0	1	0	1	0	0	0	0	0	0	No	5	1	0	1	0	1	0	2	1	1	0
1	1176	Jilin	2	2	2	19	172	60	20.2812	1	1	1		1			2	1	00:00:00	0	7:20	6.5	3	1	0	0	1	1	0	0	0	0	0	0	0	0	1	mood problems	5	1	1	1	0	1	0	1	1	0	1
1	1177	Jiangsu	2	2	1	18	186	105	30.3503	1	1	1		2	1	1	2	2	23:50:00	1	6:23	4.5	1	1	0	1	1	0	0	0	0	1	0	0	0	0	0	No	9	1	1	3	2	1	0	1	1	0	1
1	1178	Shandong	2	2	2	19	174	71	23.4509	1	1	1		1			2	3	23:00:00	0	6:20	5.5	2	1	0	0	1	0	0	0	0	0	0	0	0	0	0	No	5	1	0	2	1	0	0	1	1	1	1
1	1179	Shandong	2	2	2	19	158	52	20.83	1	1	1		1			2	3	00:00:00	1	06:40:00	6.5	3	1	0	2	0	1	0	0	0	0	1	0	0	0	0	No	5	1	1	1	0	1	0	1	1	1	0
1	1180	Shandong	2	2	2	19	158	47	18.8271	1	1	1		1			3	3	23:00:00	0	7:30	6.5	3	1	0	1	0	1	0	1	0	0	0	0	0	0	0	No	6	1	1	1	1	1	0	1	0	0	0
1	1181	Shandong	2	2	2	18	164	60	22.3081	1	1	1		1			3	3	00:00:00	0	06:30:00	6.5	3	0	0	2	1	0	0	0	0	0	0	0	1	0	0	No	4	0	0	1	0	1	0	2	1	1	0
1	1182	Shandong	2	2	2	18	160	51	19.9219	1	1	1		1			3	2	23:00:00	0	06:30:00	6.5	3	1	0	2	1	0	0	0	0	1	0	0	0	0	1	the dormitory environment affects sleep	5	1	0	1	0	1	0	2	0	0	1
1	1183	Shandong	2	2	2	19	174	74	24.4418	1	1	1		2	1	1	2	3	23:20:00	1	06:40:00	6.5	3	1	0	2	1	1	1	0	0	0	1	2	0	0	2	mood problems	6	1	1	1	0	1	0	2	1	0	1
1	1184	Shandong	2	2	2	19	170	58	20.0692	1	1	1		1			2	3	00:00:00	0	7:30	5.5	2	1	0	0	0	0	0	0	0	0	0	0	0	0	0	No	5	1	0	2	2	0	0	0	1	0	0
1	1185	Shandong	2	2	1	18	178	56	17.6745	1	1	1		2	2	1	1	3	23:00:00	0	06:40:00	6.5	3	0	0	0	0	0	0	0	0	0	1	0	0	0	0	No	2	0	0	1	0	1	0	0	1	0	1
2	1186	Shandong	2	2	2	18	163	60	22.5827	1	1	1		1			2	1	23:00:00	0	6:00	7.5	4	0	0	0	0	0	0	0	0	0	0	0	0	0	0	No	0	0	0	0	0	0	0	0	1	0	1
1	1187	Shandong	2	2	2	19	158	53	21.2306	1	1	1		1			2	3	23:20:00	0	06:30:00	6.5	3	2	0	1	1	1	1	0	0	0	0	2	0	0	0	No	6	2	1	1	0	1	0	1	1	0	1
1	1188	Shandong	2	2	1	20	181	60	18.3145	1	1	2	4	2	2	2	2	3	23:30:00	1	08:00:00	5.5	2	1	0	2	2	0	2	0	0	0	1	0	1	0	0	No	9	1	1	2	2	1	0	2	1	0	1
1	1189	Shandong	2	2	2	19	155	50	20.8117	1	1	1		1			1	2	23:30:00	0	06:03:00	4.5	1	1	0	1	1	2	1	0	0	0	0	0	0	0	0	No	9	1	1	3	2	1	0	1	1	1	0
1	1190	Shandong	2	2	1	19	168	42	14.881	1	1	1		1			1	3	23:00:00	0	06:30:00	5.5	2	1	0	1	1	0	0	0	0	0	0	0	2	0	0	No	7	1	0	2	2	1	0	1	1	1	0
1	1191	Shandong	2	2	2	18	178	58	18.3058	1	1	1		1			2	3	23:00:00	0	6:15	6.5	3	0	0	1	1	0	0	0	0	0	0	0	0	0	0	No	2	0	0	1	0	0	0	1	1	0	1
1	1192	Shandong	2	2	2	18	162	52	19.8141	1	1	1		1			2	2	23:00:00	1	6:20	5.5	2	0	0	1	2	0	0	0	0	0	0	0	0	0	0	No	6	0	1	2	1	0	0	2	1	0	0
1	1193	Shandong	2	5	1	18	186	86	24.8584	1	1	1		1			2	1	00:00:00	0	7:30	6.5	3	1	0	3	0	0	0	0	0	0	0	0	0	0	0	No	4	1	0	1	0	0	0	2	0	0	1
2	1194	Shandong	2	2	2	19	163	44	16.5607	1	1	1		1			2	3	22:00	0	6:00	8.5	5	0	0	0	0	0	0	0	0	0	0	0	0	0	0	No	0	0	0	0	0	0	0	0	0	0	0
1	1195	Jilin	2	5	2	20	168	60	21.2585	1	1	1		2	1	1	1	3	23:30:00	1	7:30	6.5	3	1	0	2	1	0	0	0	0	0	0	0	1	0	0	No	7	1	1	1	1	1	0	2	1	0	1
1	1196	Shandong	2	2	2	19	165	53	19.4674	1	1	1		1			3	3	00:00:00	1	6:15	5.5	2	3	0	3	1	2	0	0	0	0	0	0	0	0	0	No	9	3	2	2	0	0	0	2	1	0	0
1	1197	Shandong	2	5	1	18	178	60	18.937	1	1	1		1			1	3	23:30:00	2	06:30:00	5.5	2	1	0	1	1	2	1	0	1	3	2	0	1	3	0	No	9	1	2	2	1	2	0	1	0	1	0
1	1198	Jiangsu	2	2	2	21	178	65	20.5151	1	1	1		1			2	3	00:00:00	0	7:20	5.5	2	1	0	3	1	0	0	0	0	0	0	0	0	0	0	No	6	1	0	2	1	0	0	2	1	0	1
1	1199	Shandong	2	2	2	19	166	63	22.8625	1	1	1		1			2	1	22:00	3	07:00:00	6.5	3	1	0	2	2	0	2	0	0	0	0	0	0	0	0	No	9	1	2	1	2	1	0	2	1	0	0
2	1200	Shandong	2	2	2	18	165	53	19.4674	1	1	1		1			2	3	23:30:00	1	07:00:00	7.5	4	1	0	2	1	0	1	0	0	0	0	0	0	0	0	No	5	1	1	0	0	1	0	2	1	1	1
1	1201	Jiangsu	2	2	2	19	165	58	21.3039	1	1	1		1			2	3	00:30:00	0	06:30:00	5.5	2	1	0	2	2	0	0	0	0	0	0	0	1	0	0	No	6	1	0	2	0	1	0	2	1	1	1
1	1202	Jiangsu	2	2	2	18	165	55	20.202	1	1	1		2	1	1	3	3	1:30	2	6:10	4.5	1	1	0	2	2	0	1	0	1	1	1	2	0	0	0	No	8	1	1	3	0	1	0	2	1	1	1
1	1203	Shandong	1	2	2	18	163	44	16.5607	1	1	1		1			2	3	00:00:00	0	06:40:00	6.5	3	1	0	2	1	0	0	0	0	0	0	0	0	0	0	No	4	1	0	1	0	0	0	2	1	1	1
1	1204	Shandong	2	2	2	19	164	68	25.2826	1	1	1		1			2	3	2:00	3	7:05	4.5	1	3	0	3	2	3	0	3	0	0	0	0	0	0	0	No	13	3	3	3	0	1	0	3	0	1	0
1	1205	Shandong	2	2	2	19	168	59	20.9042	1	1	1		1			2	1	01:00:00	3	07:00:00	5.5	2	2	0	2	1	2	2	1	0	0	0	0	2	1	0	No	10	2	3	2	0	1	0	2	1	1	0
1	1206	Zhejiang	2	2	2	20	163	46	17.3134	1	1	1		1			1	3	1:30	0	07:45:00	5.5	2	2	0	3	1	1	0	0	0	0	0	0	0	0	0	No	7	2	1	2	0	0	0	2	0	0	1
2	1207	Shandong	2	2	1	19	185	55	16.0701	1	1	1		1			2	3	22:00	0	07:00:00	10	6	1	0	0	0	0	0	0	0	0	0	0	0	0	0	No	1	1	0	0	0	0	0	0	0	1	0
1	1208	Shandong	2	2	2	20	165	56	20.5693	1	1	1		1			2	1	00:00:00	3	08:30:00	6.5	3	1	0	3	1	0	2	0	0	0	2	2	1	0	0	No	8	1	2	1	1	1	0	2	1	1	0
1	1209	Shandong	2	2	1	19	170	70	24.2215	1	1	1		2	1	2	2	3	00:00:00	2	07:00:00	6.5	3	2	0	3	1	2	0	0	0	0	0	0	0	0	0	No	7	2	2	1	0	0	0	2	1	0	1
1	1210	Zhejiang	2	2	2	19	161	55	21.2183	1	1	1		1			2	3	00:30:00	3	7:50	5.5	2	1	0	3	1	0	0	0	0	0	0	0	0	0	0	No	8	1	2	2	1	0	0	2	1	1	1
1	1211	Zhejiang	2	2	2	19	169	50	17.5064	1	1	1		1			2	1	1:30	1	7:30	5.5	2	0	0	3	1	0	0	0	0	0	0	0	0	0	0	No	5	0	1	2	0	0	0	2	1	0	1
1	1212	Hubei	2	2	1	18	177	70	22.3435	1	1	1		1			3	2	00:00:00	2	07:00:00	6.5	3	1	0	3	2	2	0	0	0	0	0	0	1	0	0	No	8	1	2	1	0	1	0	3	1	1	0
1	1213	Guangxi	2	2	1	20	172	63	21.2953	7	1	1		2	1	4	2	3	00:30:00	2	06:40:00	6.5	3	2	0	2	1	0	0	0	1	0	2	0	0	0	0	No	7	2	1	1	0	1	0	2	0	1	0
1	1214	Hubei	2	2	1	19	175	54.5	17.7959	1	1	1		1			3	3	1:30	2	06:30:00	4.5	1	2	0	2	1	2	0	0	0	0	0	0	0	0	2	No	10	2	2	3	0	1	0	2	1	0	0
1	1215	Shandong	2	2	2	18	162	58	22.1003	1	1	1		1			3	3	23:30:00	0	06:30:00	6.5	3	0	0	2	0	0	0	0	0	0	0	0	0	0	0	No	2	0	0	1	0	0	0	1	1	1	0
2	1216	Jiangsu	2	2	1	21	175	70	22.8571	1	1	1		1			2	3	00:00:00	1	10:00:00	7.5	4	2	0	2	1	1	1	0	0	1	0	0	0	1	0	No	7	2	1	0	1	1	0	2	1	1	0
2	1217	Shandong	2	2	2	19	166	59	21.4109	1	1	1		2	1	1	1	1	22:30:00	1	7:30	8.5	5	0	0	1	1	1	1	2	0	0	0	0	0	0	0	No	3	0	1	0	0	1	0	1	0	0	0
1	1218	Jiangsu	2	2	1	19	165	55	20.202	1	1	1		2	2	1	1	3	23:30:00	0	7:20	6.5	3	1	0	2	2	0	0	0	0	1	0	0	0	0	0	No	6	1	0	1	1	1	0	2	1	1	1
1	1219	Jiangsu	2	2	1	20	183	90	26.8745	1	1	1		1			1	2	23:30:00	3	6:00	3.5	1	2	0	3	3	3	1	0	0	0	3	0	0	0	0	No	15	2	3	3	3	1	0	3	0	0	0
1	1220	Zhejiang	2	2	2	19	167	51	18.2868	1	1	1		1			1	1	01:00:00	1	7:40	5.5	2	2	0	2	1	1	1	1	0	0	0	0	0	0	0	No	9	2	1	2	1	1	0	2	1	0	1
2	1221	Zhejiang	2	2	1	21	175	90	29.3878	1	1	1		1			2	2	23:00:00	0	07:00:00	7.5	4	1	0	3	0	0	0	0	0	0	0	0	0	0	0	No	3	1	0	0	0	0	0	2	1	0	1
1	1222	Shandong	2	2	1	19	176	76	24.5351	1	1	1		2	1	1	2	3	23:00:00	1	07:10:00	6.5	3	1	0	1	1	2	0	0	0	0	1	0	1	0	0	No	7	1	2	1	1	1	0	1	1	0	0
2	1223	Jiangsu	2	2	1	18	170	65	22.4913	1	1	1		1			2	3	23:00:00	1	6:20	7.5	4	2	0	3	3	1	0	0	0	0	0	0	0	0	0	No	6	2	1	0	0	0	0	3	1	0	0
1	1224	Jiangsu	2	2	1	19	180	65	20.0617	1	1	1		2	1	1	1	1	00:00:00	0	7:30	6.5	3	0	0	2	1	0	0	0	0	0	0	0	1	0	0	No	4	0	0	1	0	1	0	2	0	1	1
1	1225	Jiangsu	2	2	1	18	177	77	24.5779	1	1	1		2	2	1	1	1	23:00:00	0	06:30:00	6.5	3	0	0	0	0	0	0	1	0	0	0	0	0	0	0	No	2	0	0	1	0	1	0	0	1	0	0
1	1226	Jiangsu	2	2	2	19	169	55	19.257	1	1	1		1			3	2	00:00:00	1	7:30	6.5	3	0	0	2	2	0	0	0	2	1	0	0	0	0	0	No	5	0	1	1	0	1	0	2	1	1	1
1	1227	Henan	2	2	1	20	186	69	19.9445	1	1	2	5	2	2	3	2	2	23:50:00	0	05:55:00	5.5	2	2	0	3	3	0	0	0	0	0	0	0	0	0	0	No	7	2	0	2	0	0	0	3	0	0	1
1	1228	Shandong	2	2	2	17	158	42	16.8242	1	1	1		1			2	3	23:30:00	0	06:30:00	6.5	3	0	0	0	0	0	0	0	0	0	0	0	0	0	0	No	1	0	0	1	0	0	0	0	1	0	1
1	1229	Anhui	2	2	2	19	174	55	18.1662	1	1	1		1			2	1	00:00:00	0	08:00:00	6.5	3	0	0	0	0	0	0	0	0	0	0	0	0	0	0	No	2	0	0	1	1	0	0	0	1	1	0
1	1230	Shandong	2	2	2	18	165	54	19.8347	1	1	1		1			1	1	23:30:00	0	6:00	6.5	3	0	0	1	0	0	0	0	0	0	0	0	0	0	0	No	2	0	0	1	0	0	0	1	1	1	1
2	1231	Shandong	2	2	2	19	160	60	23.4375	1	1	1		2	1	1	4	3	23:00:00	1	7:30	7.5	4	1	0	1	0	0	1	0	0	0	2	0	2	0	0	No	4	1	1	0	0	1	0	1	1	1	1
1	1232	Jiangsu	2	2	2	19	160	45	17.5781	1	1	1		1			2	3	23:00:00	0	07:00:00	6.5	3	1	0	2	1	0	0	1	0	0	0	0	0	0	0	No	6	1	0	1	1	1	0	2	1	0	0
2	1233	Shandong	2	2	2	19	163	60	22.5827	1	1	1		1			2	1	00:00:00	1	7:40	7.5	4	1	0	2	2	1	0	0	3	3	2	0	3	0	0	No	6	1	1	0	0	2	0	2	1	1	0
1	1234	Shandong	2	2	2	19	168	66	23.3844	1	1	1		1			3	3	23:20:00	2	06:30:00	6.5	3	1	0	2	1	1	0	0	0	0	0	0	0	0	0	No	6	1	2	1	0	0	0	2	1	0	0
1	1235	Shandong	1	2	1	18	170	60	20.7612	1	1	1		1			2	3	22:40:00	1	6:20	6.5	3	0	0	1	0	0	0	0	0	1	0	0	0	0	0	No	4	0	1	1	0	1	0	1	0	0	1
1	1236	Shandong	2	2	2	18	171	70	23.939	1	1	1		1			1	3	23:30:00	0	6:00	6.5	3	1	0	1	1	1	0	0	0	0	0	0	0	0	0	No	4	1	1	1	0	0	0	1	0	0	0
1	1237	Shandong	2	2	1	18	180	75	23.1481	1	1	1		1			2	3	00:15:00	0	6:10	5.5	2	2	0	3	3	0	1	0	1	0	1	0	0	0	0	No	8	2	0	2	0	1	0	3	1	1	0
1	1238	Shandong	2	2	2	20	168	50	17.7154	1	1	1		1			2	1	23:00:00	0	06:30:00	6.5	3	1	0	2	2	0	0	2	0	0	1	1	2	0	0	No	5	1	0	1	0	1	0	2	0	0	1
1	1239	Shandong	2	2	1	19	180	71	21.9136	1	1	1		1			1	3	23:30:00	1	6:20	6.5	3	2	0	3	2	2	0	0	1	2	3	0	2	0	0	No	9	2	2	1	0	1	0	3	1	1	0
2	1240	Shandong	2	2	1	19	178	75	23.6713	1	1	1		1			2	3	23:30:00	0	6:20	7.5	4	1	0	3	3	1	1	0	0	0	2	2	0	0	1	No	6	1	1	0	0	1	0	3	0	1	0
1	1241	Shandong	2	2	2	20	165	65	23.8751	1	1	1		1			2	3	23:30:00	2	06:30:00	5.5	2	1	0	1	1	1	0	0	1	2	1	1	1	0	0	No	8	1	2	2	1	1	0	1	1	0	0
1	1242	Shandong	2	2	1	20	170	54	18.6851	1	1	1		1			2	3	22:30:00	3	06:40:00	5.5	2	1	0	1	0	0	0	0	0	0	2	0	0	0	0	No	9	1	2	2	2	1	0	1	1	1	0
1	1243	Shandong	2	2	2	18	163	50	18.8189	1	1	1		1			1	1	00:30:00	2	6:25	4.5	1	2	0	3	1	2	2	0	1	0	1	3	2	0	2	staying up late to work or study	12	2	2	3	1	2	0	2	1	1	1
1	1244	Shandong	2	3	2	18	163	53	19.9481	1	1	1		1			1	1	00:00:00	2	6:50	5.5	2	2	0	3	3	2	2	0	3	1	0	3	2	2	2	mood problems	12	2	2	2	1	2	0	3	0	0	1
1	1245	Shandong	2	1	2	19	163	60	22.5827	1	1	1		1			2	1	23:30:00	0	6:50	6.5	3	1	0	3	1	0	0	0	0	0	0	0	1	0	0	No	5	1	0	1	0	1	0	2	1	1	1
1	1246	Shandong	2	3	1	19	173	82	27.3982	7	1	1		2	1	1	2	3	23:30:00	1	07:10:00	6.5	3	2	0	3	3	2	1	3	2	2	2	2	0	3	0	No	10	2	2	1	0	2	0	3	1	1	1
1	1247	Shandong	2	3	2	18	162	64	24.3865	1	1	1		1			2	3	23:45	1	6:10	6.5	3	2	0	2	1	2	1	0	1	1	1	1	1	0	1	Sickness	8	2	2	1	0	1	0	2	1	0	0
1	1248	Shandong	2	1	1	19	175	57	18.6122	1	1	1		1			2	1	00:30:00	0	6:10	5.5	2	1	0	2	1	0	0	0	3	3	0	0	0	0	0	No	6	1	0	2	0	1	0	2	1	1	1
1	1249	Shandong	2	3	2	18	162	64	24.3865	1	1	1		1			1	3	23:45	1	6:10	6.5	3	1	0	2	1	2	1	0	2	2	1	1	1	0	2	Sickness	8	1	2	1	0	2	0	2	1	0	0
1	1250	Shandong	2	3	2	20	170	61	21.1073	1	1	1		1			3	1	00:00:00	1	06:40:00	6.5	3	1	0	3	3	3	0	0	1	0	1	1	1	0	0	No	8	1	2	1	0	1	0	3	1	1	1
1	1251	Shandong	2	3	2	18	158	65	26.0375	1	1	1		1			1	3	23:30:00	0	06:30:00	5.5	2	1	0	3	1	1	0	1	3	2	1	0	0	0	1	staying up late to work or study	8	1	1	2	1	1	0	2	0	0	1
1	1252	Shandong	2	3	2	20	156	61.4	25.2301	1	1	1		1			2	3	23:00:00	1	7:30	6.5	3	2	0	2	1	1	1	0	0	0	1	0	1	0	0	No	8	2	1	1	1	1	0	2	1	0	0
1	1253	Shandong	2	1	2	18	169	64	22.4082	1	1	1		2	1	1	1	3	23:30:00	3	6:10	5.5	2	3	1	3	3	3	3	3	0	3	3	0	1	0	3	Sickness	15	3	3	2	1	2	1	3	1	1	0
1	1254	Shandong	2	3	1	19	160	63	24.6094	1	1	1		1			2	2	01:00:00	0	06:30:00	5.5	2	0	0	3	3	0	0	0	3	0	1	0	0	0	0	No	6	0	0	2	0	1	0	3	1	1	1
1	1255	Shandong	2	3	2	19	160	58	22.6562	1	1	1		1			2	3	00:00:00	1	07:00:00	5.5	2	2	0	3	3	2	1	1	0	0	1	0	2	0	0	No	11	2	2	2	1	1	0	3	1	0	0
1	1256	Shandong	2	1	2	18	152	69	29.865	1	1	1		1			2	2	23:00:00	0	6:00	5.5	2	1	0	3	2	1	2	3	2	1	2	1	1	2	2	the dormitory environment affects sleep	10	1	1	2	1	2	0	3	1	0	1
1	1257	Shandong	2	3	2	21	160	80	31.25	1	1	1		2	1	1	3	3	00:00:00	1	7:30	6.5	3	1	0	2	3	1	1	1	0	2	0	0	2	0	0	No	7	1	1	1	0	1	0	3	1	1	1
2	1258	Shandong	3	3	1	24	165	70	25.7117	1	1	1		1			2	3	00:00:00	0	7:50	7.5	4	0	0	3	2	0	0	0	0	0	0	0	0	0	0	No	3	0	0	0	0	0	0	3	1	0	0
1	1259	Shandong	3	1	2	23	158	53	21.2306	1	1	1		2	1	1	3	2	23:00:00	0	6:50	6.5	3	1	0	1	1	0	1	1	0	0	1	0	1	0	0	No	5	1	0	1	1	1	0	1	1	0	1
1	1260	Shandong	2	3	2	19	153	43	18.369	7	1	1		1			3	3	23:30:00	0	06:30:00	6.5	3	1	0	3	3	0	0	0	0	0	0	0	0	0	0	No	5	1	0	1	0	0	0	3	1	0	0
1	1261	Shandong	2	3	1	18	174	74	24.4418	1	1	1		1			1	3	23:00:00	0	6:15	6.5	3	1	0	1	1	0	0	0	0	0	0	0	0	0	0	No	3	1	0	1	0	0	0	1	1	0	0
1	1262	Shandong	2	1	1	19	175	55	17.9592	1	1	1		2	1	1	3	1	00:00:00	0	06:30:00	5.5	2	2	0	3	1	0	0	0	0	0	1	0	0	0	0	No	7	2	0	2	0	1	0	2	1	1	1
1	1263	Shandong	2	3	1	19	178	55	17.3589	1	1	1		1			2	3	23:30:00	1	06:30:00	5.5	2	1	0	3	1	0	0	0	0	0	0	0	0	0	3	the dormitory environment affects sleep	8	1	1	2	1	1	0	2	0	0	0
1	1264	Shandong	2	3	2	19	161	51	19.6752	1	1	1		1			2	3	23:00:00	0	6:00	6.5	3	1	0	1	1	1	0	0	0	0	0	0	0	0	0	No	4	1	1	1	0	0	0	1	0	1	1
2	1265	Shandong	3	1	2	24	160	51	19.9219	1	1	1		1			2	1	23:30:00	0	7:30	7.5	4	1	0	2	1	0	0	0	0	0	0	0	0	0	0	No	3	1	0	0	0	0	0	2	0	0	1
1	1266	Shandong	3	3	1	24	177	80	25.5354	1	1	1		2	1	1	1	3	23:30:00	2	07:00:00	6.5	3	1	0	2	1	2	0	2	0	2	0	0	1	0	0	No	7	1	2	1	0	1	0	2	1	0	0
1	1267	Shandong	2	3	2	20	164	51	18.9619	1	1	1		1			2	3	23:30:00	0	07:00:00	6.5	3	1	0	0	0	1	0	0	0	0	0	0	1	0	0	No	4	1	1	1	0	1	0	0	1	0	0
1	1268	Shandong	2	2	2	20	162	50	19.052	1	1	1		1			1	3	23:50:00	1	07:00:00	6.5	3	2	0	3	0	2	0	0	0	0	2	1	1	0	0	No	8	2	2	1	0	1	0	2	1	0	1
1	1269	Shandong	2	3	2	19	165	40	14.6924	1	1	1		1			2	3	23:00:00	3	6:15	6.5	3	1	0	1	1	2	0	0	0	0	0	2	0	0	0	No	7	1	3	1	0	1	0	1	0	1	0
1	1270	Sichuan	2	3	1	20	180	60	18.5185	1	1	1		1			3	1	23:30:00	2	06:40:00	5.5	2	2	0	3	2	3	1	0	2	0	3	0	0	0	0	No	12	2	3	2	1	1	0	3	1	1	0
1	1271	Shandong	2	2	2	19	156	45	18.4911	1	1	1		1			1	3	23:45	1	6:20	5.5	2	1	0	0	0	0	0	0	0	0	0	0	0	0	0	No	5	1	1	2	1	0	0	0	0	1	0
1	1272	Shanghai	2	3	1	28	190	83	22.9917	1	1	1		1			1	1	00:00:00	0	07:00:00	6.5	3	2	0	2	1	0	1	0	0	0	1	1	1	0	0	No	6	2	0	1	0	1	0	2	1	0	1
1	1273	Shandong	3	3	2	24	160	55	21.4844	1	1	1		1			2	3	23:00:00	1	7:30	6.5	3	1	0	1	1	1	0	0	0	0	0	0	1	0	0	No	6	1	1	1	1	1	0	1	0	0	0
1	1274	Shandong	3	3	2	23	167	52	18.6453	1	1	1		1			1	3	00:00:00	0	7:30	6.5	3	1	0	0	0	0	2	0	2	0	2	0	0	2	0	No	3	1	0	1	0	1	0	0	1	0	0
2	1275	Shandong	3	3	2	24	162	57.5	21.9098	1	1	1		1			1	3	23:45	3	8:45	8.5	5	0	0	0	0	0	0	0	0	0	0	0	2	2	0	No	3	0	2	0	0	1	0	0	0	1	0
1	1276	Shandong	3	3	2	23	170	58	20.0692	1	1	1		2	1	2	1	3	00:30:00	0	08:00:00	6.5	3	1	0	0	0	1	1	0	0	0	0	0	1	1	0	No	4	1	1	1	0	1	0	0	1	1	0
1	1277	Shandong	2	3	2	19	162	54	20.5761	1	1	1		2	1	1	2	3	23:00:00	0	6:00	6.5	3	2	0	2	2	1	2	0	0	0	0	0	1	1	0	No	7	2	1	1	0	1	0	2	0	0	1
2	1278	Shanxi	3	1	2	25	150	50	22.2222	1	1	1		1			2	2	23:00:00	1	08:00:00	7.5	4	1	0	0	1	1	1	1	0	0	0	0	1	0	0	No	5	1	1	0	1	1	0	1	1	1	1
1	1279	Shanxi	3	3	1	24	170	70	24.2215	1	1	1		2	1	1	1	1	22:30:00	0	7:30	6.5	3	0	0	0	0	0	0	0	0	0	0	0	0	0	0	No	3	0	0	1	2	0	0	0	1	0	0
2	1280	Henan	3	3	2	23	160	60	23.4375	1	1	1		2	1	1	3	3	23:30:00	0	08:00:00	8.5	5	1	0	2	1	0	1	0	0	0	3	0	0	1	0	No	4	1	0	0	0	1	0	2	1	0	1
2	1281	Henan	3	3	2	24	173	57	19.0451	1	1	1		1			1	3	23:00:00	1	07:00:00	7.5	4	1	0	1	0	2	0	0	0	0	0	0	1	0	0	No	5	1	2	0	0	1	0	1	1	0	1
1	1282	Shanxi	3	3	2	24	155	48	19.9792	1	1	1		1			3	3	23:00:00	0	7:30	6.5	3	0	0	0	1	0	0	0	0	0	0	0	1	0	0	No	4	0	0	1	1	1	0	1	0	1	1
2	1283	Henan	3	3	2	23	160	62	24.2188	1	1	1		1			3	1	22:00	1	7:40	7.5	4	0	0	0	0	0	0	1	0	0	0	0	1	0	0	No	3	0	1	0	1	1	0	0	1	0	0
1	1284	Henan	3	2	1	25	173	70	23.3887	2	1	1		1			3	3	23:00:00	0	08:00:00	6.5	3	0	0	0	0	0	0	0	0	3	3	0	0	0	0	No	4	0	0	1	2	1	0	0	0	0	1
1	1285	Heilongjiang	3	3	2	25	168	70	24.8016	1	1	1		1			1	2	2:00	1	7:50	4.5	1	0	0	2	0	0	0	1	0	0	1	0	0	0	0	No	7	0	1	3	1	1	0	1	1	0	1
1	1286	Shanxi	3	3	1	23	163	62	23.3355	1	1	1		1			3	3	23:00:00	0	06:30:00	6.5	3	0	0	0	0	0	0	1	0	0	0	0	0	0	0	No	2	0	0	1	0	1	0	0	0	0	1
1	1287	Shandong	2	3	1	20	175	65	21.2245	1	1	1		1			2	3	00:00:00	0	06:30:00	6.5	3	2	0	1	0	0	0	0	0	0	2	0	1	0	0	No	5	2	0	1	0	1	0	1	0	0	1
1	1288	Hunan	3	3	2	26	155	96	39.9584	1	1	1		1			2	3	01:00:00	1	07:00:00	5.5	2	1	0	2	1	0	1	1	0	0	0	0	0	0	0	No	7	1	1	2	0	1	0	2	1	0	1
1	1289	Shanghai	3	3	2	24	167	75	26.8923	1	1	1		1			1	3	23:00:00	3	9:00	6.5	3	1	0	3	3	0	0	0	0	0	0	0	1	0	0	No	10	1	2	1	2	1	0	3	1	0	0
1	1290	Shandong	3	3	2	25	165	50	18.3655	1	1	1		1			1	1	23:30:00	3	6:15	4.5	1	3	0	2	3	2	1	0	0	0	1	1	1	0	0	No	15	3	3	3	2	1	0	3	1	1	1
1	1291	Shanxi	3	1	2	24	166	51	18.5078	1	1	1		1			3	3	00:00:00	0	07:00:00	6.5	3	1	0	3	1	0	0	0	0	0	0	0	1	0	0	No	5	1	0	1	0	1	0	2	1	1	1
1	1292	Shanxi	3	3	2	26	163	52	19.5717	1	1	1		1			2	3	23:00:00	0	06:30:00	5.5	2	1	0	1	0	0	0	0	0	0	0	0	0	0	0	No	6	1	0	2	2	0	0	1	0	0	1
1	1293	Hunan	3	3	2	24	160	55	21.4844	1	1	1		1			1	3	00:30:00	0	7:30	6.5	3	1	0	3	1	1	1	0	0	0	0	0	0	1	0	No	6	1	1	1	0	1	0	2	1	0	1
2	1294	Shandong	3	3	1	25	178	55	17.3589	1	1	1		1			2	2	23:00:00	0	7:20	7.5	4	1	0	3	2	0	1	1	0	0	0	0	0	0	2	staying up late to work or study	5	1	0	0	0	1	0	3	0	0	1
1	1295	Jiangsu	3	3	1	25	170	76	26.2976	1	1	1		2	1	1	2	3	00:00:00	3	9:00	6.5	3	1	0	1	1	2	0	0	0	0	1	1	0	0	0	No	9	1	3	1	2	1	0	1	1	1	0
2	1296	Shanxi	3	3	2	24	168	67	23.7387	1	1	1		1			2	3	23:20:00	0	07:00:00	7.5	4	0	0	1	1	0	0	0	0	2	0	0	2	0	0	No	2	0	0	0	0	1	0	1	1	0	0
2	1297	Tianjin	3	2	2	23	165	51	18.7328	1	1	1		1			3	3	23:20:00	0	7:20	7.5	4	1	0	3	3	0	1	0	0	0	0	0	2	0	0	No	5	1	0	0	0	1	0	3	0	0	1
1	1298	Shandong	2	3	2	18	163	62	23.3355	1	1	1		2	1	2	2	3	23:00:00	1	6:00	5.5	2	2	0	2	2	2	2	1	1	0	2	0	1	0	0	No	10	2	2	2	1	1	0	2	1	1	1
1	1299	Shandong	2	3	2	19	172	46	15.5489	1	1	1		2	1	1	2	3	23:30:00	1	06:40:00	6.5	3	1	0	3	2	0	0	0	0	0	0	0	0	0	0	No	6	1	1	1	0	0	0	3	1	0	0
1	1300	Shandong	2	3	2	18	172	70	23.6614	1	1	1		1			3	1	23:30:00	0	06:30:00	6.5	3	0	0	1	1	0	0	0	0	0	0	0	1	1	0	No	3	0	0	1	0	1	0	1	0	0	1
2	1301	Shandong	2	3	1	20	177	65	20.7476	1	1	2	3	2	2	1	1	3	23:30:00	0	08:00:00	7.5	4	0	0	0	0	0	0	0	0	0	2	0	0	0	0	No	1	0	0	0	0	1	0	0	0	1	0
1	1302	Shandong	2	3	2	19	163	49	18.4425	1	1	1		1			3	2	01:00:00	3	08:30:00	5.5	2	2	0	3	3	0	1	2	0	0	1	1	1	0	0	No	12	2	2	2	2	1	0	3	1	1	0
2	1303	Shandong	2	1	2	20	160	50	19.5312	1	1	1		1			1	2	23:00:00	1	07:00:00	7.5	4	0	0	2	1	1	0	1	0	0	0	0	0	0	0	No	4	0	1	0	0	1	0	2	0	0	1
1	1304	Shandong	2	3	1	21	178	85	26.8274	1	1	1		1			2	3	23:30:00	2	6:50	6.5	3	2	0	3	3	3	2	1	1	1	1	1	0	0	0	No	10	2	3	1	0	1	0	3	0	0	0
1	1305	Shandong	2	3	2	20	158	53	21.2306	1	1	1		1			2	3	00:00:00	3	7:30	6.5	3	2	0	2	2	0	1	1	0	0	0	0	1	0	0	No	8	2	2	1	0	1	0	2	1	0	0
2	1306	Shandong	3	3	2	24	160	48	18.75	1	1	1		1			2	1	00:00:00	1	7:30	7.5	4	1	0	3	2	0	0	0	0	0	0	0	0	0	0	No	5	1	1	0	0	0	0	3	0	0	0
1	1307	Shandong	3	2	1	24	175	55	17.9592	1	1	1		1			1	3	00:30:00	1	08:00:00	6.5	3	1	0	1	1	1	2	0	0	0	2	0	0	0	2	the dormitory environment affects sleep	5	1	1	1	0	1	0	1	1	0	1
2	1308	Shandong	2	3	1	20	185	75	21.9138	1	1	1		1			3	1	22:30:00	1	06:30:00	7.5	4	2	0	3	1	0	1	0	0	0	0	3	0	0	0	No	6	2	1	0	0	1	0	2	0	0	1
1	1309	Shandong	2	3	2	19	155	65	27.0552	7	1	1		1			1	3	23:30:00	1	06:30:00	6.5	3	1	0	0	1	1	0	0	0	3	2	0	2	0	0	No	5	1	1	1	0	1	0	1	1	1	0
1	1310	Shandong	2	3	1	19	178	63	19.8839	1	1	1		1			1	3	23:00:00	1	07:00:00	6.5	3	2	1	2	2	2	0	0	1	0	2	3	0	1	1	the dormitory environment affects sleep	10	2	2	1	1	1	1	2	1	0	0
1	1311	Shandong	2	3	1	19	168	68	24.093	1	1	2	8	2	1	1	3	3	00:00:00	0	06:30:00	5.5	2	0	0	0	1	0	0	0	0	0	0	0	0	0	0	No	3	0	0	2	0	0	0	1	1	1	1
1	1312	Shandong	2	3	1	19	176	57	18.4013	1	1	1		2	1	1	2	3	23:30:00	0	06:30:00	5.5	2	0	0	2	1	0	0	0	2	0	0	0	1	2	0	No	6	0	0	2	1	1	0	2	1	0	0
2	1313	Henan	3	1	1	24	187	75	21.4476	1	1	1		2	1	2	1	3	23:30:00	1	08:30:00	7.5	4	1	0	1	0	0	1	0	1	0	1	0	0	0	0	No	5	1	1	0	1	1	0	1	1	0	1
1	1314	Shandong	2	3	2	19	163	60	22.5827	1	1	1		1			1	3	23:30:00	1	7:30	6.5	3	2	0	2	1	2	0	0	0	0	0	0	0	0	1	Sickness	9	2	2	1	1	1	0	2	1	1	1
1	1315	Shandong	2	3	1	19	184	85	25.1063	1	1	1		1			2	3	00:00:00	0	7:30	5.5	2	1	0	0	1	3	3	2	1	1	0	0	0	0	0	No	9	1	2	2	2	1	0	1	1	0	0
2	1316	Shandong	2	3	2	20	161	60	23.1473	1	1	1		1			2	3	22:45	0	6:50	7.5	4	1	0	0	0	0	0	0	0	0	0	0	0	0	0	No	1	1	0	0	0	0	0	0	0	0	0
1	1317	Sichuan	2	3	1	24	173	62	20.7157	1	1	1		1			1	1	01:00:00	1	07:00:00	5.5	2	3	0	3	3	3	0	0	0	0	2	0	0	1	3	the dormitory environment affects sleep	11	3	2	2	0	1	0	3	1	0	1
2	1318	Shandong	2	3	2	21	163	58	21.83	1	1	1		1			2	2	23:00:00	0	07:00:00	7.5	4	1	0	0	0	1	1	0	0	0	1	0	0	0	0	No	3	1	1	0	0	1	0	0	1	0	0
1	1319	Shandong	2	2	1	19	175	60	19.5918	1	1	1		1			2	3	00:00:00	0	6:50	6.5	3	0	0	0	1	0	0	0	0	0	0	0	0	0	0	No	2	0	0	1	0	0	0	1	1	1	0
1	1320	Shandong	2	3	2	19	150	48	21.3333	1	1	1		1			3	3	23:00:00	1	07:00:00	6.5	3	1	0	2	1	1	0	0	0	0	0	0	0	1	0	No	7	1	1	1	1	1	0	2	1	0	0
1	1321	Beijing	2	3	1	20	180	80	24.6914	1	1	1		2	2	2	2	2	00:15:00	0	06:30:00	4.5	1	0	0	0	1	0	2	0	0	0	0	0	1	0	0	No	7	0	0	3	2	1	0	1	0	0	1
1	1322	Shandong	2	1	2	19	163	54	20.3244	1	1	1		1			1	2	23:30:00	0	06:30:00	6.5	3	1	0	0	0	0	0	1	0	0	0	0	1	0	0	No	3	1	0	1	0	1	0	0	1	1	1
2	1323	Jilin	2	3	2	21	170	85	29.4118	1	1	1		1			2	1	00:00:00	0	9:00	9.5	6	1	0	0	1	0	0	0	0	0	0	0	1	0	0	No	3	1	0	0	0	1	0	1	1	1	1
1	1324	Shandong	2	3	1	20	170	65	22.4913	1	1	1		2	1	1	2	3	23:00:00	1	7:30	6.5	3	1	0	1	1	1	1	1	0	0	0	0	0	0	0	No	6	1	1	1	1	1	0	1	1	1	1
1	1325	Heilongjiang	3	3	2	23	167	57	20.4382	1	1	1		1			1	3	23:30:00	1	6:50	6.5	3	2	0	3	1	2	2	0	0	0	1	1	1	0	0	No	8	2	2	1	0	1	0	2	0	0	1
1	1326	Shandong	2	3	1	19	175	75	24.4898	1	1	1		1			1	3	00:00:00	0	07:00:00	6.5	3	2	0	3	3	0	1	1	3	0	3	1	2	0	0	No	8	2	0	1	0	2	0	3	1	0	1
1	1327	Shandong	2	3	2	19	160	53	20.7031	1	1	1		1			2	2	23:15:00	0	06:30:00	6.5	3	0	0	0	1	0	0	0	0	0	0	2	0	0	0	No	3	0	0	1	0	1	0	1	1	0	0
2	1328	Shandong	2	3	2	18	162	50	19.052	1	1	1		1			1	3	23:00:00	0	6:15	7.5	4	1	0	2	0	0	1	0	0	0	1	1	2	0	0	No	3	1	0	0	0	1	0	1	1	0	0
1	1329	Gansu	2	3	2	21	158	50	20.0288	1	1	1		1			1	3	22:00	1	07:00:00	5.5	2	1	0	1	1	2	2	2	0	0	0	1	3	1	0	No	10	1	2	2	3	1	0	1	0	1	1
1	1330	Hubei	2	3	2	22	158	48	19.2277	1	1	1		1			2	3	23:30:00	2	07:00:00	6.5	3	2	0	1	1	2	0	0	0	0	0	0	0	0	0	No	6	2	2	1	0	0	0	1	1	0	0
1	1331	Shandong	2	1	2	19	160	49	19.1406	1	1	1		1			2	1	23:40	0	6:20	5.5	2	2	0	1	1	0	0	0	0	0	0	0	2	0	0	No	7	2	0	2	1	1	0	1	1	1	0
2	1332	Yunnan	2	3	2	18	160	62	24.2188	3	1	1		1			3	3	23:30:00	0	08:00:00	7.5	4	1	0	0	3	0	0	0	0	0	1	1	0	0	0	No	4	1	0	0	0	1	0	2	0	0	0
2	1333	Beijing	3	3	2	24	158	43	17.2248	1	1	1		1			3	1	00:00:00	0	08:30:00	8.5	5	1	0	0	0	0	0	0	0	0	0	0	0	0	0	No	1	1	0	0	0	0	0	0	0	0	1
1	1334	Gansu	2	3	2	21	155	52	21.6441	1	1	1		1			2	3	23:30:00	1	5:30	4.5	1	2	0	3	1	2	0	0	0	1	0	0	1	2	0	No	11	2	2	3	1	1	0	2	1	1	0
1	1335	Shandong	2	3	2	18	165	60	22.0386	1	1	1		1			1	3	22:30:00	1	06:40:00	6.5	3	0	0	2	1	0	0	0	0	0	0	0	0	0	0	No	5	0	1	1	1	0	0	2	1	0	0
1	1336	Shandong	2	3	2	18	162	59	22.4813	1	1	1		1			2	3	23:30:00	0	6:20	6.5	3	0	0	0	0	0	0	0	0	0	0	0	0	0	0	No	1	0	0	1	0	0	0	0	1	0	0
1	1337	Shandong	2	1	1	21	169	80	28.0102	1	1	1		1			2	3	23:00:00	1	08:00:00	6.5	3	1	0	0	0	0	1	1	0	1	0	0	0	0	0	No	6	1	1	1	2	1	0	0	0	0	0
2	1338	Shandong	2	3	2	21	169	58	20.3074	1	1	1		1			2	3	00:30:00	0	9:00	8.5	5	1	0	2	1	0	1	0	0	1	2	0	0	1	0	No	4	1	0	0	0	1	0	2	1	1	0
1	1339	Shandong	2	3	1	20	174	63	20.8086	1	1	1		1			2	1	22:45	1	07:00:00	6.5	3	0	0	0	0	2	0	1	0	0	0	0	0	0	0	No	5	0	2	1	1	1	0	0	1	0	1
2	1340	Shandong	2	3	1	20	171	72.5	24.794	1	1	1		2	1	1	1	1	23:30:00	0	07:45:00	7.5	4	0	0	0	1	0	1	0	0	3	0	0	0	0	0	No	2	0	0	0	0	1	0	1	1	0	0
1	1341	Shandong	2	3	2	21	168	58	20.5499	1	1	1		1			2	3	00:00:00	0	9:00	6.5	3	1	0	1	2	3	1	0	0	0	0	0	0	0	0	No	9	1	2	1	2	1	0	2	1	0	0
1	1342	Shandong	2	3	2	19	169	80	28.0102	1	1	1		1			2	3	22:40:00	0	08:00:00	6.5	3	1	0	1	0	0	0	0	0	3	0	0	1	0	0	No	6	1	0	1	2	1	0	1	1	0	0
1	1343	Shandong	2	3	1	20	183	76	22.694	1	1	1		2	1	1	2	3	23:30:00	0	7:30	6.5	3	1	0	2	1	1	0	0	0	0	2	0	1	2	0	No	7	1	1	1	1	1	0	2	1	1	0
2	1344	Shandong	2	3	1	20	181	60	18.3145	1	1	1		1			1	1	23:30:00	1	7:30	7.5	4	1	0	0	0	1	0	0	0	0	0	0	0	0	0	No	2	1	1	0	0	0	0	0	0	1	0
2	1345	Shandong	2	3	2	20	166	60	21.7738	1	1	1		1			2	3	00:00:00	3	9:30	7.5	4	0	0	1	1	0	0	0	0	0	0	0	0	0	0	No	4	0	2	0	1	0	0	1	1	0	0
1	1346	Shandong	2	3	2	24	167	58	20.7967	1	1	1		1			1	3	23:30:00	0	08:30:00	6.5	3	1	0	1	1	1	2	0	0	0	0	0	0	0	0	No	7	1	1	1	2	1	0	1	1	0	0
2	1347	Shandong	2	3	1	19	178	67	21.1463	1	1	1		1			2	3	23:00:00	0	7:30	7.5	4	0	0	0	0	0	0	0	0	0	0	0	0	0	0	No	0	0	0	0	0	0	0	0	1	0	0
1	1348	Shandong	2	3	2	18	163	57	21.4536	1	1	1		1			2	3	23:10:00	0	06:30:00	6.5	3	1	0	2	1	0	0	1	0	0	3	0	2	0	0	No	5	1	0	1	0	1	0	2	1	1	1
2	1349	Shandong	2	1	2	20	163	49	18.4425	1	1	1		1			2	3	23:00:00	1	08:00:00	7.5	4	1	0	0	0	0	2	1	0	0	2	0	0	0	2	the dormitory environment affects sleep	4	1	1	0	1	1	0	0	1	0	0
1	1350	Shandong	2	3	1	19	185	65	18.992	1	1	2	1	2	1	1	2	1	23:00:00	0	6:20	5.5	2	1	0	2	0	0	0	0	0	1	0	0	0	0	0	No	6	1	0	2	1	1	0	1	1	0	0
2	1351	Shandong	2	3	1	20	180	70	21.6049	1	1	1		2	1	1	2	3	02:00:00	0	12:00:00	9.5	6	0	0	0	0	1	0	0	0	0	0	0	0	0	0	No	1	0	1	0	0	0	0	0	1	1	0
1	1352	Beijing	2	1	1	20	185	90	26.2966	1	1	2	1	2	1	1	2	2	23:00:00	0	08:00:00	5.5	2	2	0	1	1	1	1	0	0	0	1	0	1	0	0	No	10	2	1	2	3	1	0	1	0	1	0
1	1353	Shandong	2	3	2	20	160	44	17.1875	1	1	1		1			3	3	23:00:00	0	6:00	6.5	3	0	0	1	1	0	0	0	0	0	0	0	0	0	0	No	2	0	0	1	0	0	0	1	0	0	1
2	1354	Shandong	3	3	2	24	160	56	21.875	1	1	1		1			1	3	23:00:00	2	10:00:00	9.5	6	1	0	1	1	1	1	0	0	1	1	3	2	1	0	No	5	1	2	0	0	1	0	1	0	0	1
1	1355	Shandong	2	3	2	19	164	60	22.3081	1	1	1		1			3	3	00:00:00	1	06:30:00	5.5	2	1	0	3	1	1	0	0	0	0	0	3	2	0	1	the dormitory environment affects sleep	7	1	1	2	0	1	0	2	0	1	0
1	1356	Shandong	2	3	1	21	180	75	23.1481	1	1	1		1			2	1	01:00:00	0	7:30	5.5	2	2	0	2	2	3	0	0	1	0	2	0	2	0	0	No	9	2	2	2	0	1	0	2	1	0	0
2	1357	Shandong	2	3	1	19	180	59	18.2099	1	1	1		1			2	3	23:30:00	0	6:50	7.5	4	0	0	1	1	0	0	0	0	0	0	0	0	0	0	No	1	0	0	0	0	0	0	1	0	0	1
2	1358	Shandong	2	3	1	22	167	68	24.3824	1	1	1		2	1	2	2	1	23:00:00	2	7:30	7.5	4	2	0	2	1	2	1	1	1	0	1	1	1	1	1	the dormitory environment affects sleep	7	2	2	0	0	1	0	2	0	1	1
1	1359	Shandong	2	3	2	19	165	57	20.9366	1	1	1		1			1	1	23:30:00	0	06:30:00	6.5	3	1	0	3	1	0	1	0	1	0	1	0	0	0	0	No	5	1	0	1	0	1	0	2	1	0	0
1	1360	Tianjin	1	3	2	19	171	56	19.1512	1	1	1		2	2	1	2	3	23:30:00	3	7:20	6.5	3	1	2	2	1	3	0	1	0	0	2	0	0	2	0	No	11	1	3	1	1	1	2	2	1	1	0
1	1361	Shandong	2	1	2	20	163	50	18.8189	1	1	1		1			2	1	22:30:00	3	7:30	3.5	1	3	0	3	3	3	3	0	3	0	2	0	3	3	3	the dormitory environment affects sleep	17	3	3	3	3	2	0	3	0	0	0
1	1362	Shandong	2	3	1	20	180	80	24.6914	1	1	1		1			1	3	23:30:00	0	7:30	6.5	3	1	0	1	1	0	0	0	0	0	0	0	0	0	0	No	4	1	0	1	1	0	0	1	1	1	1
1	1363	Shandong	2	1	1	20	181	56	17.0935	1	1	1		2	1	2	2	1	23:00:00	0	6:00	6.5	3	0	0	1	1	0	0	1	0	0	0	0	0	0	0	No	3	0	0	1	0	1	0	1	1	0	0
1	1364	Shandong	2	3	2	19	167	58	20.7967	1	1	1		2	1	1	3	1	23:00:00	2	08:00:00	3.5	1	3	0	3	3	3	3	3	3	0	2	0	2	3	3	the dormitory environment affects sleep	18	3	3	3	3	3	0	3	0	1	0
1	1365	Liaoning	2	1	1	21	175	65	21.2245	1	1	1		1			2	1	01:00:00	3	7:30	6.5	3	0	0	2	1	0	0	0	0	0	0	0	0	0	0	No	5	0	2	1	0	0	0	2	1	0	0
2	1366	Shandong	2	3	1	19	200	110	27.5	1	1	2	4	2	1	5	2	1	01:00:00	0	6:00	7.5	4	2	0	3	1	0	0	0	0	0	0	0	0	0	0	No	4	2	0	0	0	0	0	2	1	1	1
1	1367	Shandong	2	3	2	18	162	58	22.1003	1	1	1		2	2	1	2	1	23:00:00	1	6:00	5.5	2	2	0	3	1	2	0	0	1	0	2	0	0	0	0	No	10	2	2	2	1	1	0	2	1	0	1
1	1368	Shandong	2	3	1	18	168	64	22.6757	7	1	1		2	1	1	1	3	23:00:00	1	6:10	6.5	3	0	0	3	2	0	1	1	0	0	3	0	1	3	0	No	6	0	1	1	0	1	0	3	0	0	1
1	1369	Shandong	2	3	1	18	188	95	26.8787	1	1	1		1			1	1	00:30:00	1	6:10	5.5	2	2	0	3	3	0	0	0	0	0	0	0	0	0	0	No	8	2	1	2	0	0	0	3	1	0	1
1	1370	Shandong	2	3	2	19	162	53	20.1951	1	1	1		1			2	3	23:30:00	2	6:00	5.5	2	1	0	1	1	1	0	0	0	0	1	0	0	0	0	No	7	1	2	2	0	1	0	1	0	1	1
1	1371	Shandong	2	1	2	17	165	70	25.7117	1	1	1		1			2	3	22:30:00	0	06:30:00	6.5	3	1	0	3	2	0	3	0	2	1	2	0	2	0	0	No	8	1	0	1	1	2	0	3	0	0	1
1	1372	Shandong	2	3	1	19	165	56	20.5693	1	1	1		1			2	3	00:00:00	0	6:25	6.5	3	1	0	1	0	0	0	0	0	0	0	0	0	0	0	No	3	1	0	1	0	0	0	1	1	1	0
1	1373	Shandong	2	3	1	18	185	94	27.4653	1	1	1		1			1	2	23:00:00	2	06:30:00	5.5	2	2	0	3	2	3	0	0	0	2	0	0	0	0	0	No	13	2	3	2	2	1	0	3	1	0	1
1	1374	Shandong	2	3	1	18	169	80	28.0102	1	1	1		2	1	3	2	3	00:00:00	1	6:10	6.5	3	0	0	0	0	0	0	0	0	3	0	0	0	0	0	No	3	0	1	1	0	1	0	0	0	0	1
1	1375	Shandong	2	1	2	19	170	55	19.0311	1	1	1		1			1	3	22:00	2	07:00:00	6.5	3	2	0	2	0	0	2	0	0	0	1	2	0	0	0	No	8	2	1	1	2	1	0	1	1	0	0
1	1376	Shandong	2	3	2	18	165	55	20.202	1	1	1		1			1	3	22:30:00	0	6:00	6.5	3	1	0	1	1	2	3	0	0	0	1	0	1	0	0	No	5	1	1	1	0	1	0	1	0	0	1
1	1377	Shandong	2	1	1	19	177	62	19.79	1	1	1		2	1	2	2	3	23:00:00	1	6:00	5.5	2	2	0	3	3	3	3	0	0	0	2	0	2	0	1	the dormitory environment affects sleep	11	2	2	2	1	1	0	3	0	1	0
1	1378	Hebei	2	3	1	17	173	62	20.7157	1	1	1		1			2	3	23:20:00	0	6:20	6.5	3	1	0	2	1	0	1	1	0	0	1	0	0	0	0	No	5	1	0	1	0	1	0	2	1	0	1
1	1379	Shandong	2	3	1	18	174	64	21.1389	1	1	1		1			2	3	00:00:00	0	06:29:00	4.5	1	1	0	3	2	0	0	0	0	0	1	0	0	0	0	No	10	1	0	3	2	1	0	3	0	0	1
1	1380	Shandong	2	1	1	19	168	70	24.8016	1	1	1		1			2	3	00:30:00	1	7:20	5.5	2	3	1	3	2	3	0	0	0	0	2	0	0	0	3	the dormitory environment affects sleep	13	3	2	2	1	1	1	3	0	0	0
1	1381	Shandong	2	3	2	19	158	53	21.2306	1	1	1		1			2	2	23:30:00	0	6:00	6.5	3	1	0	3	3	0	0	0	0	2	0	0	0	0	0	No	6	1	0	1	0	1	0	3	1	0	0
1	1382	Shandong	2	1	2	18	160	47	18.3594	1	1	1		1			1	1	00:00:00	2	6:00	5.5	2	1	0	3	1	1	2	0	0	0	0	0	0	0	0	No	8	1	2	2	0	1	0	2	1	1	1
1	1383	Hebei	2	3	2	19	163	49	18.4425	1	1	1		1			2	2	23:30:00	0	6:00	5.5	2	0	0	2	1	0	0	0	0	0	1	1	0	0	0	No	5	0	0	2	0	1	0	2	1	1	1
2	1384	Shandong	2	1	1	21	165	61.5	22.5895	1	1	1		1			1	3	23:59	0	07:00:00	7.5	4	1	0	3	2	0	2	2	0	0	0	0	1	0	0	No	5	1	0	0	0	1	0	3	0	1	1
1	1385	Shandong	2	3	2	18	160	50	19.5312	1	1	1		1			2	3	23:30:00	1	6:00	5.5	2	1	0	0	1	1	0	0	0	0	0	0	0	0	0	No	5	1	1	2	0	0	0	1	1	0	1
2	1386	Shandong	2	3	2	18	158	52	20.83	1	1	1		1			2	3	22:40:00	0	6:00	7.5	4	1	0	1	1	0	1	3	0	0	0	0	0	0	0	No	3	1	0	0	0	1	0	1	0	0	1
1	1387	Shanghai	2	1	2	18	168	60	21.2585	1	1	1		1			2	1	01:00:00	0	6:20	4.5	1	2	0	3	2	0	0	0	0	0	0	0	1	0	0	No	10	2	0	3	1	1	0	3	1	1	1
1	1388	Guizhou	2	3	2	19	155	47	19.563	1	1	1		1			1	3	00:30:00	0	6:20	5.5	2	1	0	2	1	1	1	0	0	0	1	0	0	0	0	No	7	1	1	2	0	1	0	2	1	1	1
1	1389	Shandong	2	4	1	19	186	95	27.4598	1	1	1		1			2	3	00:00:00	0	6:15	5.5	2	1	0	3	2	0	0	0	0	0	0	0	0	0	0	No	6	1	0	2	0	0	0	3	1	1	1
2	1390	Shandong	2	3	2	19	155	50	20.8117	1	1	1		1			2	1	23:00:00	0	06:20:00	7.5	4	1	0	2	1	0	0	0	0	0	0	0	0	0	0	No	3	1	0	0	0	0	0	2	1	0	0
1	1391	Shandong	2	4	1	17	182	68.5	20.6799	1	1	1		1			4	2	23:59	1	6:25	5.5	2	1	0	1	2	1	0	1	0	0	0	0	0	0	1	Sickness	7	1	1	2	0	1	0	2	1	1	1
1	1392	Shandong	2	3	1	18	178	75	23.6713	1	1	1		2	1	1	1	2	23:30:00	1	6:20	6.5	3	1	0	1	1	0	0	0	0	0	0	0	0	0	0	No	4	1	1	1	0	0	0	1	1	1	1
2	1393	Shandong	2	3	1	18	187	70	20.0177	1	1	1		1			3	1	23:00:00	0	06:30:00	7.5	4	1	0	2	1	0	0	0	0	0	0	0	0	0	0	No	3	1	0	0	0	0	0	2	0	0	0
1	1394	Shandong	2	3	2	19	158	63.8	25.5568	2	1	1		2	1	1	1	1	23:30:00	0	06:30:00	6.5	3	0	0	1	2	1	0	0	2	1	0	2	2	0	0	No	5	0	1	1	0	1	0	2	1	1	1
1	1395	Shandong	2	3	1	18	182	75	22.6422	1	1	1		1			1	3	00:30:00	0	6:00	5.5	2	1	0	2	0	0	0	0	0	0	0	0	0	0	0	No	4	1	0	2	0	0	0	1	1	1	1
1	1396	Shandong	2	4	2	18	156	45	18.4911	1	1	1		1			3	2	1:30	0	6:10	6.5	3	0	0	0	0	0	0	3	0	0	0	0	0	0	0	No	2	0	0	1	0	1	0	0	1	1	0
1	1397	Shandong	2	3	2	18	170	46	15.917	1	1	1		1			2	1	01:00:00	0	6:15	5.5	2	0	0	0	0	0	0	0	0	0	0	0	0	0	0	No	2	0	0	2	0	0	0	0	1	1	0
2	1398	Shandong	2	3	2	18	165	57	20.9366	1	1	1		1			2	3	23:30:00	0	06:30:00	7.5	4	1	0	1	1	0	0	1	0	0	1	1	0	0	0	No	3	1	0	0	0	1	0	1	1	0	1
1	1399	Shandong	2	1	2	18	164	52	19.3337	1	1	1		1			2	3	23:00:00	0	6:00	6.5	3	1	0	2	0	0	0	0	0	0	1	1	0	0	0	No	4	1	0	1	0	1	0	1	1	0	1
1	1400	Shandong	2	3	1	18	170	75	25.9516	1	1	1		1			2	3	00:00:00	0	07:00:00	6.5	3	2	0	3	2	0	0	0	0	3	3	0	2	0	0	No	7	2	0	1	0	1	0	3	1	0	0
1	1401	Shandong	2	3	2	18	145	41	19.5006	1	1	1		1			3	3	23:30:00	1	07:00:00	6.5	3	1	0	2	1	0	0	0	0	0	0	0	0	0	0	No	5	1	1	1	0	0	0	2	1	1	0
1	1402	Shandong	2	3	2	18	165	70	25.7117	1	1	1		1			2	3	23:30:00	0	6:15	5.5	2	0	0	3	1	0	0	0	0	0	1	0	1	3	0	No	6	0	0	2	1	1	0	2	1	0	0
1	1403	Shandong	2	3	2	18	150	40	17.7778	7	1	1		1			2	1	01:00:00	3	6:15	5.5	2	2	0	2	1	0	0	0	0	0	2	0	1	0	0	No	9	2	2	2	0	1	0	2	0	1	1
1	1404	Shandong	2	3	1	18	132	90	51.6529	1	1	1		1			2	3	23:30:00	0	7:30	6.5	3	1	0	2	1	2	0	2	0	2	2	1	0	0	0	No	7	1	1	1	1	1	0	2	1	1	0
1	1405	Shandong	2	3	2	18	164	60	22.3081	3	1	1		1			3	2	23:30:00	0	6:10	6.5	3	1	0	3	1	0	0	0	0	0	0	0	0	0	0	No	4	1	0	1	0	0	0	2	1	0	1
2	1406	Hebei	2	3	1	19	172	57	19.2672	1	1	1		1			3	3	23:00:00	1	7:30	7.5	4	0	0	0	0	0	0	0	0	0	0	0	1	0	0	No	2	0	1	0	0	1	0	0	1	0	0
1	1407	Shandong	2	1	1	18	178	85	26.8274	1	1	1		2	1	1	1	3	23:00:00	0	6:20	5.5	2	2	0	2	1	0	0	0	0	0	0	0	0	1	0	No	8	2	0	2	1	1	0	2	1	0	1
1	1408	Shandong	2	4	2	19	170	60	20.7612	1	1	1		1			3	3	00:10:00	0	06:30:00	4.5	1	1	0	3	3	1	0	0	0	1	0	1	1	1	0	No	11	1	1	3	2	1	0	3	1	1	0
1	1409	Shandong	2	3	2	19	170	64	22.1453	1	1	1		1			1	3	22:30:00	0	05:55:00	5.5	2	0	0	3	3	0	0	0	0	0	0	0	0	0	0	No	7	0	0	2	2	0	0	3	0	1	0
1	1410	Shandong	2	1	2	18	169	65	22.7583	4	1	1		2	1	1	2	3	23:30:00	1	6:10	5.5	2	3	0	3	2	2	3	1	0	0	2	2	2	0	0	No	13	3	2	2	1	2	0	3	0	0	1
1	1411	Shandong	2	4	1	18	178	65	20.5151	1	1	1		1			1	3	23:00:00	1	6:00	6.5	3	2	0	2	2	1	0	0	0	0	1	0	0	0	0	No	7	2	1	1	0	1	0	2	0	0	0
1	1412	Shandong	2	3	2	18	152	69	29.865	1	1	1		1			2	3	23:00:00	0	6:10	6.5	3	1	0	3	3	0	1	2	3	1	3	1	0	3	0	No	7	1	0	1	0	2	0	3	1	0	1
1	1413	Shandong	2	1	1	21	180	61	18.8272	1	1	1		2	1	1	3	2	01:00:00	0	08:00:00	6.5	3	1	0	2	2	0	0	0	0	0	0	0	0	0	0	No	4	1	0	1	0	0	0	2	1	0	0
2	1414	Shandong	2	3	2	20	158	60	24.0346	1	1	1		1			1	3	23:30:00	1	07:00:00	7.5	4	0	0	0	1	1	0	0	0	1	1	1	0	0	0	No	3	0	1	0	0	1	0	1	1	0	0
1	1415	Shandong	2	3	2	19	170	62	21.4533	1	1	1		1			2	3	00:00:00	0	07:00:00	6.5	3	2	0	3	3	0	2	0	0	0	2	1	2	0	0	No	7	2	0	1	0	1	0	3	1	0	1
1	1416	Shandong	2	3	2	18	176	62	20.0155	1	1	1		1			1	2	23:00:00	2	06:30:00	6.5	3	2	0	1	1	0	0	0	0	0	0	0	0	0	0	No	5	2	1	1	0	0	0	1	1	0	1
2	1417	Shandong	2	3	1	20	181	65	19.8407	1	1	1		1			2	1	23:30:00	0	07:00:00	7.5	4	1	0	0	0	1	0	0	1	0	2	0	0	0	0	No	3	1	1	0	0	1	0	0	1	1	1
1	1418	Shandong	2	3	2	19	170	60	20.7612	1	1	1		1			1	1	00:30:00	3	07:10:00	6.5	3	1	0	1	1	0	2	0	0	0	2	0	2	0	0	No	6	1	2	1	0	1	0	1	1	1	0
1	1419	Shandong	2	1	1	19	183	82	24.4857	1	1	1		1			1	1	23:30:00	0	06:45:00	6.5	3	0	0	0	0	0	0	0	0	0	1	0	0	0	0	No	2	0	0	1	0	1	0	0	1	0	1
1	1420	Shandong	2	3	2	19	168	63	22.3214	1	1	1		1			3	1	23:00:00	0	07:15:00	6.5	3	1	0	2	1	1	0	0	0	0	0	0	0	0	0	No	6	1	1	1	1	0	0	2	1	0	0
1	1421	Shandong	2	4	2	19	168	57	20.1956	1	1	1		1			1	2	00:00:00	1	7:40	6.5	3	2	0	1	1	2	0	0	0	0	0	0	1	0	0	No	7	2	2	1	0	1	0	1	1	1	0
1	1422	Shandong	2	3	2	20	155	40	16.6493	1	1	1		1			2	2	23:30:00	1	7:30	6.5	3	1	0	3	1	2	0	0	0	0	2	3	2	0	0	No	8	1	2	1	1	1	0	2	1	0	0
1	1423	Shandong	2	4	2	20	165	64	23.5078	1	1	1		1			2	1	22:30:00	1	07:00:00	6.5	3	1	0	2	2	1	1	0	1	1	2	0	1	0	0	No	7	1	1	1	1	1	0	2	1	0	0
1	1424	Shandong	2	1	1	19	180	55	16.9753	1	1	1		1			2	3	23:00:00	1	07:10:00	6.5	3	0	0	0	0	0	0	0	0	0	0	0	0	0	0	No	3	0	1	1	1	0	0	0	0	1	0
1	1425	Shandong	2	3	2	19	161	46	17.7462	1	1	1		2	1	1	2	3	00:30:00	2	07:00:00	5.5	2	1	1	3	2	0	1	0	0	0	0	3	1	2	0	No	9	1	1	2	0	1	1	3	1	1	1
1	1426	Shandong	2	1	2	19	158	56	22.4323	1	1	1		1			1	2	23:00:00	1	07:00:00	5.5	2	1	0	2	0	0	0	0	0	0	0	0	3	0	0	No	8	1	1	2	2	1	0	1	1	0	0
1	1427	Jilin	2	4	1	19	181	82	25.0298	1	1	1		2	2	5	2	1	23:30:00	1	7:30	6.5	3	1	0	0	1	1	0	0	0	0	0	0	0	0	0	No	5	1	1	1	1	0	0	1	0	0	1
1	1428	Shandong	2	1	2	19	163	47	17.6898	1	1	1		1			1	1	23:30:00	1	07:00:00	6.5	3	1	0	1	1	1	0	1	0	0	0	0	0	0	0	No	5	1	1	1	0	1	0	1	0	0	1
1	1429	Shandong	2	3	2	21	170	58	20.0692	1	1	1		1			1	3	00:00:00	1	07:00:00	6.5	3	1	0	2	0	1	0	0	0	2	0	3	0	0	0	No	5	1	1	1	0	1	0	1	1	1	1
2	1430	Shandong	2	4	2	18	175	55	17.9592	1	1	1		1			2	1	23:30:00	0	7:30	7.5	4	0	0	0	1	0	0	0	0	0	1	0	1	0	0	No	2	0	0	0	0	1	0	1	1	0	0
2	1431	Shandong	2	3	2	19	163	55	20.7008	1	1	1		1			1	3	23:40	2	07:00:00	7.5	4	0	0	1	1	1	1	1	0	0	1	1	1	0	0	No	4	0	2	0	0	1	0	1	1	1	0
1	1432	Shandong	2	4	1	20	183	56	16.7219	1	1	1		1			2	2	22:30:00	3	07:00:00	6.5	3	1	0	2	1	2	0	0	0	0	1	0	1	2	0	No	9	1	3	1	1	1	0	2	0	0	0
1	1433	Shandong	2	1	2	20	163	49	18.4425	1	1	1		2	1	1	1	1	23:30:00	0	7:30	6.5	3	0	0	0	0	0	0	1	0	1	0	0	0	0	0	No	3	0	0	1	1	1	0	0	1	0	1
1	1434	Shandong	2	3	1	19	176	87	28.0863	1	1	1		1			1	3	00:00:00	0	07:00:00	6.5	3	1	0	2	1	0	0	0	1	0	0	0	0	1	0	No	5	1	0	1	0	1	0	2	0	1	0
1	1435	Shandong	1	1	2	20	166	56	20.3223	1	1	1		1			1	3	23:00:00	0	06:35:00	6.5	3	1	0	1	1	0	0	0	0	0	0	0	1	0	0	No	4	1	0	1	0	1	0	1	0	0	1
1	1436	Jilin	1	3	2	18	172	65	21.9713	1	1	1		1			3	3	23:00:00	0	6:20	5.5	2	0	0	1	1	0	0	0	0	0	0	0	0	0	0	No	4	0	0	2	1	0	0	1	1	1	0
1	1437	Shandong	1	1	1	21	178	76	23.9869	1	1	1		1			1	3	23:00:00	1	6:10	6.5	3	1	0	1	1	1	0	1	0	0	0	0	0	0	0	No	5	1	1	1	0	1	0	1	1	0	0
1	1438	Shandong	1	3	1	19	177	87.5	27.9294	1	1	1		2	2	3	3	3	22:30:00	0	07:00:00	5.5	2	2	0	3	1	0	0	0	0	0	2	0	0	0	0	No	9	2	0	2	2	1	0	2	0	1	0
1	1439	Shandong	1	3	2	19	163	62	23.3355	1	1	1		1			2	3	21:40:00	3	6:20	6.5	3	2	0	3	3	2	0	0	0	0	0	0	0	0	0	No	10	2	3	1	1	0	0	3	1	0	0
2	1440	Shandong	1	1	2	20	170	70	24.2215	1	1	1		1			2	3	23:00:00	2	6:00	7.5	4	0	0	1	0	0	0	0	0	0	0	0	0	0	0	No	2	0	1	0	0	0	0	1	1	0	0
2	1441	Shandong	1	3	2	20	150	40	17.7778	1	1	1		1			1	3	23:00:00	1	06:30:00	7.5	4	1	0	0	0	0	0	0	0	0	0	0	0	0	0	No	2	1	1	0	0	0	0	0	1	0	0
1	1442	Shandong	1	3	2	19	168	54	19.1327	1	1	1		1			3	1	1:50	3	06:30:00	3	1	3	3	3	3	3	3	1	3	0	0	2	2	2	0	No	20	3	3	3	3	2	3	3	0	0	0
1	1443	Shandong	1	3	1	19	180	101	31.1728	1	1	1		2	1	2	1	3	23:00:00	1	07:00:00	6.5	3	1	0	1	1	2	0	1	2	3	1	1	2	0	0	No	8	1	2	1	1	2	0	1	1	1	1
1	1444	Shandong	1	3	1	19	184	72	21.2665	1	1	1		1			2	2	23:00:00	0	06:35:00	6.5	3	1	0	0	1	1	1	0	0	0	0	0	0	0	0	No	5	1	1	1	0	1	0	1	1	0	0
2	1445	Shandong	1	1	2	19	163	50	18.8189	1	1	1		1			1	3	23:00:00	0	06:30:00	7.5	4	1	0	1	1	1	0	0	0	0	0	0	0	0	0	No	3	1	1	0	0	0	0	1	0	0	0
2	1446	Shandong	1	3	2	19	162	62	23.6244	1	1	1		1			1	2	22:30:00	1	06:30:00	7.5	4	1	0	0	0	0	2	2	0	0	0	0	0	0	0	No	3	1	1	0	0	1	0	0	0	0	0
1	1447	Shandong	1	3	2	20	166	53	19.2336	1	1	1		1			1	3	23:00:00	0	06:30:00	6.5	3	1	0	2	1	0	0	0	1	2	1	1	0	0	0	No	5	1	0	1	0	1	0	2	1	0	0
1	1448	Shandong	1	3	2	19	163	53	19.9481	1	1	1		1			1	3	22:40:00	3	05:50:00	5.5	2	2	0	2	2	3	2	3	0	0	0	1	0	2	0	No	11	2	3	2	1	1	0	2	0	0	0
2	1449	Shandong	1	1	2	18	158	52	20.83	1	1	1		1			2	3	23:30:00	0	07:00:00	7.5	4	0	0	3	0	0	0	1	0	0	1	0	0	0	0	No	3	0	0	0	0	1	0	2	1	0	0
2	1450	Shandong	1	3	2	19	162	46	17.5278	1	1	1		1			2	3	22:30:00	0	6:20	7.5	4	0	0	0	0	0	0	0	0	0	0	0	0	0	0	No	0	0	0	0	0	0	0	0	1	1	0
1	1451	Shandong	1	3	2	20	168	70	24.8016	1	1	1		1			3	3	23:40	0	06:30:00	5.5	2	1	0	2	1	0	1	0	0	1	0	0	1	0	0	No	7	1	0	2	1	1	0	2	1	0	0
2	1452	Shandong	1	3	2	19	164	43.5	16.1734	1	1	1		1			1	2	23:00:00	0	06:30:00	7.5	4	1	0	2	2	0	0	0	1	2	1	1	0	0	1	No	4	1	0	0	0	1	0	2	1	0	0
1	1453	Shandong	1	3	2	20	158	57	22.8329	1	1	1		1			1	1	22:30:00	0	6:00	6.5	3	0	0	0	0	0	0	1	0	0	0	0	0	0	0	No	2	0	0	1	0	1	0	0	1	0	0
1	1454	Shandong	1	3	2	19	163	75	28.2284	1	1	1		1			2	2	23:30:00	0	6:00	6.5	3	1	0	3	1	1	2	1	1	2	2	1	1	0	0	No	7	1	1	1	0	2	0	2	1	0	0
2	1455	Shandong	1	3	2	19	173	56	18.7109	1	1	1		1			2	2	22:00	1	06:30:00	7.5	4	1	0	1	1	2	1	0	1	1	0	0	2	0	1	the dormitory environment affects sleep	5	1	2	0	0	1	0	1	0	0	0
1	1456	Shandong	1	4	1	18	180	90	27.7778	1	1	1		1			2	3	23:00:00	0	06:30:00	6.5	3	0	0	1	1	0	0	0	0	1	0	0	0	0	0	No	3	0	0	1	0	1	0	1	0	1	0
1	1457	Shandong	1	1	1	20	180	80	24.6914	1	1	1		1			3	1	22:30:00	1	06:30:00	4.5	1	0	0	0	0	0	0	0	0	0	0	0	0	0	0	No	7	0	1	3	3	0	0	0	0	0	0
1	1458	Shandong	1	1	2	19	158	48.2	19.3078	1	1	1		1			3	1	23:00:00	0	06:40:00	6.5	3	1	0	2	0	0	2	0	0	0	2	2	0	0	0	No	4	1	0	1	0	1	0	1	1	0	0
1	1459	Shandong	1	4	2	20	160	65	25.3906	1	1	1		1			2	3	23:00:00	0	6:00	5.5	2	2	1	2	2	0	0	0	0	3	2	0	0	0	0	No	9	2	0	2	1	1	1	2	0	1	0
1	1460	Liaoning	1	1	2	19	161	54	20.8325	2	1	1		1			1	3	23:00:00	1	06:30:00	6.5	3	1	0	2	1	2	1	2	2	2	2	2	2	1	0	No	8	1	2	1	0	2	0	2	1	1	0
1	1461	Shandong	1	3	1	19	177	72.5	23.1415	1	1	1		1			1	3	23:00:00	0	6:10	6.5	3	2	0	2	1	0	0	0	0	0	0	0	0	0	0	No	5	2	0	1	0	0	0	2	1	1	0
1	1462	Shandong	1	4	2	20	167	60	21.5139	1	1	1		1			3	1	23:00:00	0	06:40:00	6.5	3	1	0	3	2	0	0	1	0	0	2	0	0	0	0	No	6	1	0	1	0	1	0	3	1	0	0
1	1463	Shandong	1	3	2	19	170	80	27.6817	1	1	1		1			2	3	22:00	2	6:50	6.5	3	2	0	3	1	3	3	2	2	0	0	2	3	0	0	No	12	2	3	1	2	2	0	2	1	0	1
1	1464	Shandong	2	1	1	18	185	70	20.4529	1	1	1		1			2	3	23:00:00	2	6:54	6.5	3	1	0	1	1	2	0	0	0	3	0	0	0	0	0	No	7	1	2	1	1	1	0	1	0	0	0
1	1465	Shandong	1	4	2	19	153	44	18.7962	1	1	1		1			2	3	23:00:00	1	06:30:00	6.5	3	2	0	3	2	3	1	0	0	3	2	0	0	0	0	No	9	2	2	1	0	1	0	3	0	0	0
1	1466	Shandong	1	3	1	20	177	80	25.5354	1	1	1		1			2	1	22:35	0	6:00	6.5	3	1	0	1	1	0	0	0	0	0	0	0	0	0	0	No	3	1	0	1	0	0	0	1	1	0	1
1	1467	Shandong	1	6	2	20	170	66.5	23.0104	1	1	1		1			2	3	23:00:00	2	6:15	6.5	3	1	0	0	1	1	0	0	0	2	1	0	1	0	0	No	6	1	2	1	0	1	0	1	1	0	0
1	1468	Shandong	1	1	2	19	163	60	22.5827	1	1	1		1			2	2	22:40:00	3	06:30:00	4.5	1	3	0	2	2	3	3	0	0	0	0	0	2	0	0	No	15	3	3	3	3	1	0	2	0	0	0
1	1469	Shandong	1	4	1	20	170	85	29.4118	1	1	1		1			2	3	22:30:00	0	07:00:00	6.5	3	1	0	3	3	0	0	0	1	0	1	0	0	0	0	No	7	1	0	1	1	1	0	3	0	1	1
1	1470	Shandong	1	1	2	18	161	42	16.2031	4	1	1		1			2	3	23:40	2	6:50	5.5	2	2	0	2	1	1	1	0	0	0	0	0	0	0	0	No	10	2	2	2	1	1	0	2	1	1	0
1	1471	Shandong	1	6	2	20	155	55	22.8928	1	1	1		1			2	1	21:50:00	0	6:00	6.5	3	1	0	1	0	0	0	0	0	0	3	0	0	0	0	No	5	1	0	1	1	1	0	1	0	0	1
1	1472	Shandong	1	3	2	19	165	55	20.202	1	1	1		1			2	1	23:30:00	1	6:50	3	1	1	0	2	2	2	1	3	1	0	2	0	2	2	0	No	13	1	2	3	3	2	0	2	0	1	0
1	1473	Shandong	1	4	1	21	178	93	29.3524	1	1	2	7	2	2	1	2	3	00:00:00	0	07:00:00	6.5	3	0	0	1	0	0	0	0	0	0	0	0	0	0	0	No	2	0	0	1	0	0	0	1	1	0	0
1	1474	Shandong	1	3	2	20	164	65	24.1672	1	1	1		1			3	1	23:30:00	0	07:00:00	6.5	3	0	0	0	0	0	0	0	0	0	0	0	0	0	0	No	1	0	0	1	0	0	0	0	1	0	0
1	1475	Shandong	1	4	2	19	168	58	20.5499	1	1	1		1			2	3	22:30:00	0	6:20	6.5	3	1	0	2	1	0	0	0	0	0	0	0	2	0	0	No	6	1	0	1	1	1	0	2	1	1	0
2	1476	Shandong	1	4	1	20	178	76	23.9869	1	1	1		1			2	3	23:30:00	0	07:00:00	7.5	4	0	0	0	0	0	0	0	0	0	0	0	0	0	0	No	0	0	0	0	0	0	0	0	1	0	0
1	1477	Shandong	1	3	2	18	164	66	24.539	1	1	1		1			1	3	22:30:00	1	06:30:00	6.5	3	1	0	0	1	1	0	1	0	0	0	0	0	0	0	No	6	1	1	1	1	1	0	1	0	0	0
1	1478	Shandong	1	4	1	18	183	70	20.9024	1	1	1		2	1	1	3	3	1:30	0	4:30	3.5	1	0	0	1	0	0	1	0	0	0	0	0	0	0	0	No	5	0	0	3	0	1	0	1	0	0	1
1	1479	Shandong	1	6	2	20	166	52	18.8707	1	1	1		1			2	1	23:00:00	1	06:30:00	6.5	3	2	0	3	1	1	0	1	0	0	0	3	3	2	0	No	7	2	1	1	0	1	0	2	1	1	0
2	1480	Shandong	1	1	1	20	191	74	20.2845	1	1	2	3	2	1	1	3	2	23:00:00	0	07:00:00	7.5	4	0	0	0	0	0	0	0	0	0	0	0	0	0	0	No	0	0	0	0	0	0	0	0	1	0	0
1	1481	Shandong	1	4	2	19	172	55	18.5911	1	1	1		1			2	3	23:30:00	0	06:30:00	6.5	3	1	0	2	2	1	1	1	2	2	2	2	1	3	2	the dormitory environment affects sleep	7	1	1	1	0	2	0	2	1	0	0
1	1482	Shandong	1	6	2	20	163	45	16.937	1	1	1		1			2	3	23:30:00	0	06:40:00	6.5	3	1	0	1	1	0	1	0	0	0	0	0	0	1	0	No	4	1	0	1	0	1	0	1	0	0	0
1	1483	Shandong	1	4	2	20	168	60	21.2585	1	1	1		1			1	1	23:00:00	1	06:40:00	6.5	3	2	0	3	2	2	2	3	0	0	3	0	1	0	0	No	9	2	2	1	0	1	0	3	1	1	0
1	1484	Shandong	1	1	1	19	178	74	23.3556	1	1	1		1			2	3	22:30:00	1	06:40:00	6.5	3	1	0	1	1	1	1	1	0	0	0	1	1	0	0	No	6	1	1	1	1	1	0	1	0	0	0
1	1485	Shandong	1	4	1	19	180	80	24.6914	1	1	1		2	1	1	2	3	23:30:00	0	6:50	6.5	3	0	0	1	1	0	0	0	0	3	0	0	1	0	0	No	3	0	0	1	0	1	0	1	1	1	0
1	1486	Shandong	2	3	2	20	163	43	16.1843	1	1	1		1			3	3	22:00	3	6:00	6.5	3	2	0	2	1	2	0	3	2	0	2	0	1	0	0	No	10	2	3	1	1	1	0	2	0	1	0
2	1487	Shandong	1	4	2	19	165	60	22.0386	1	1	1		1			2	1	22:45	3	06:30:00	7.5	4	0	0	1	1	0	1	0	0	3	0	0	0	0	0	No	4	0	2	0	0	1	0	1	1	0	0
1	1488	Shandong	1	1	2	21	153	70	29.903	1	1	1		1			2	3	23:30:00	0	06:30:00	6.5	3	1	0	3	1	0	0	0	0	1	0	0	2	0	0	No	5	1	0	1	0	1	0	2	1	0	0
1	1489	Shandong	1	6	2	19	160	52	20.3125	1	1	1		1			2	3	23:00:00	0	06:40:00	6.5	3	0	0	1	1	1	0	0	0	0	0	0	0	0	0	No	3	0	1	1	0	0	0	1	0	0	0
2	1490	Shandong	1	1	1	19	180	75	23.1481	1	1	1		1			2	1	23:00:00	1	06:30:00	7.5	4	1	0	3	1	0	0	0	0	0	0	0	1	0	0	No	5	1	1	0	0	1	0	2	1	0	0
2	1491	Shandong	1	4	2	20	165	52	19.1001	1	1	1		1			2	3	22:45	1	06:30:00	7.5	4	1	0	1	1	2	3	1	0	1	0	2	0	0	0	No	5	1	2	0	0	1	0	1	0	0	0
2	1492	Shandong	1	3	1	19	178	78	24.6181	1	1	1		1			2	3	22:30:00	0	06:30:00	7.5	4	1	0	0	0	0	1	0	0	0	0	0	0	0	0	No	2	1	0	0	0	1	0	0	0	0	0
2	1493	Shandong	1	6	2	19	164	45	16.7311	1	1	1		1			2	2	22:30:00	1	06:30:00	7.5	4	1	0	1	0	0	0	0	0	0	0	0	0	0	0	No	3	1	1	0	0	0	0	1	0	0	0
1	1494	Shandong	1	4	2	20	165	60	22.0386	1	1	1		1			2	3	23:30:00	0	06:45:00	6.5	3	1	0	1	1	0	0	0	0	0	0	0	0	1	0	No	4	1	0	1	0	1	0	1	0	1	1
2	1495	Shandong	1	1	2	18	160	55	21.4844	1	1	1		1			2	3	23:10:00	1	06:35:00	7.5	4	2	0	2	1	3	2	0	0	0	0	0	0	1	0	No	7	2	2	0	0	1	0	2	0	0	0
2	1496	Shandong	1	4	2	20	168	55	19.487	1	1	1		1			2	3	22:50:00	0	6:50	7.5	4	0	0	0	1	0	0	1	0	0	0	0	0	0	0	No	2	0	0	0	0	1	0	1	1	0	0
1	1497	Shandong	1	6	2	19	158	67	26.8386	1	1	1		1			2	3	22:00	0	06:40:00	6.5	3	0	0	2	0	0	0	0	0	0	0	0	0	0	0	No	3	0	0	1	1	0	0	1	1	0	0
1	1498	Shandong	1	4	2	20	160	44	17.1875	1	1	1		1			1	3	20:50:00	0	07:00:00	5.5	2	0	0	0	0	0	0	3	0	0	0	0	0	0	0	No	6	0	0	2	3	1	0	0	1	0	1
2	1499	Shandong	1	1	2	19	155	50	20.8117	1	1	1		1			2	3	23:30:00	0	07:00:00	7.5	4	1	0	1	1	2	0	1	0	1	2	0	0	0	0	No	4	1	1	0	0	1	0	1	1	1	0
2	1500	Shandong	1	3	2	19	160	43	16.7969	1	1	1		1			2	1	23:00:00	2	6:50	7.5	4	2	0	2	1	3	0	0	0	0	0	0	2	0	1	staying up late to work or study	8	2	3	0	0	1	0	2	0	0	0
2	1501	Shandong	1	4	1	21	185	85	24.8356	1	1	1		1			2	3	21:55:00	0	06:30:00	7.5	4	1	0	0	1	1	0	0	0	1	0	0	1	0	0	No	4	1	1	0	0	1	0	1	0	0	0
1	1502	Shandong	1	1	2	19	163	50	18.8189	1	1	1		1			3	1	23:00:00	1	06:35:00	6.5	3	1	0	2	0	0	1	0	0	0	0	0	1	0	0	No	5	1	1	1	0	1	0	1	1	0	0
1	1503	Shandong	1	4	2	18	168	63	22.3214	1	1	1		1			2	3	22:30:00	2	06:30:00	4.5	1	2	0	2	2	2	2	0	2	2	2	2	0	0	0	No	14	2	2	3	3	2	0	2	0	0	0
2	1504	Shandong	1	6	1	19	165	70.8	26.0055	1	1	1		1			2	3	21:50	0	05:50:00	7.5	4	0	0	0	0	0	3	0	0	3	0	0	0	0	0	No	1	0	0	0	0	1	0	0	1	0	0
1	1505	Shandong	1	4	2	19	168	65	23.03	1	1	1		1			3	1	23:30:00	1	06:40:00	6.5	3	1	0	3	2	0	0	0	0	0	0	0	0	0	0	No	6	1	1	1	0	0	0	3	1	0	0
1	1506	Shandong	1	3	2	20	165	58	21.3039	1	1	1		2	1	1	3	1	23:30:00	0	06:30:00	6.5	3	0	0	0	1	0	0	1	0	0	0	0	1	0	0	No	3	0	0	1	0	1	0	1	0	0	0
2	1507	Shandong	1	1	1	20	179	75	23.4075	1	1	1		1			2	2	23:00:00	0	06:30:00	7.5	4	0	0	1	1	0	0	0	0	0	0	0	0	0	0	No	1	0	0	0	0	0	0	1	1	0	1
2	1508	Shandong	1	4	1	21	175	75	24.4898	1	1	1		1			2	1	23:00:00	3	6:50	7.5	4	1	0	3	2	2	2	3	1	0	3	0	0	1	0	No	9	1	3	0	0	2	0	3	1	0	0
1	1509	Shandong	1	6	1	20	174	65	21.4692	1	1	1		1			2	3	23:30:00	1	6:20	5.5	2	2	0	1	1	1	2	1	0	0	0	0	1	0	0	No	8	2	1	2	1	1	0	1	0	1	0
2	1510	Shandong	1	1	1	21	188	75	21.22	1	1	1		1			2	3	22:00	0	7:30	7.5	4	0	0	0	0	0	0	0	0	0	0	0	0	0	0	No	1	0	0	0	1	0	0	0	1	0	0
2	1511	Shandong	1	4	1	20	180	80	24.6914	1	1	1		1			2	1	22:30:00	1	06:30:00	7.5	4	1	0	2	1	1	0	0	0	0	0	0	0	0	0	No	4	1	1	0	0	0	0	2	0	0	0
1	1512	Shandong	1	6	2	19	165	72	26.4463	1	1	1		1			2	2	23:00:00	0	06:40:00	6.5	3	1	0	0	0	0	0	0	0	0	0	0	0	0	0	No	2	1	0	1	0	0	0	0	1	1	0
1	1513	Shandong	1	4	2	19	163	48	18.0662	1	1	1		1			2	1	22:50:00	1	06:35:00	6.5	3	1	0	3	1	2	1	1	0	0	1	0	0	0	0	No	8	1	2	1	1	1	0	2	1	0	0
1	1514	Shandong	1	3	2	20	160	60	23.4375	1	1	1		1			1	1	22:30:00	2	6:00	4.5	1	1	0	2	1	3	1	0	0	0	0	0	0	0	0	No	13	1	3	3	3	1	0	2	0	1	0
1	1515	Shandong	1	1	2	21	152	41	17.7458	1	1	1		1			2	3	23:20:00	1	6:50	6.5	3	2	0	2	1	2	3	2	1	2	0	0	2	1	0	No	9	2	2	1	0	2	0	2	0	1	0
2	1516	Shandong	1	3	1	19	175	70	22.8571	1	1	1		1			2	3	23:00:00	0	6:00	7.5	4	0	0	0	0	0	0	0	0	0	0	0	0	0	0	No	0	0	0	0	0	0	0	0	1	0	0
1	1517	Shandong	1	1	2	19	167	71	25.4581	1	1	1		1			1	3	23:00:00	2	06:30:00	6.5	3	2	0	2	1	2	0	0	0	0	1	0	1	1	0	No	8	2	2	1	0	1	0	2	0	0	0
1	1518	Shandong	1	3	2	19	158	55	22.0317	1	1	1		1			2	3	23:30:00	3	06:40:00	6.5	3	1	0	0	0	0	0	0	0	0	0	0	0	0	0	No	4	1	2	1	0	0	0	0	1	0	0
1	1519	Shandong	1	1	2	19	178	95	29.9836	1	1	1		1			2	3	23:40	2	06:40:00	6.5	3	1	0	3	1	1	0	0	0	0	0	0	0	0	0	No	6	1	2	1	0	0	0	2	1	1	0
1	1520	Shandong	1	3	1	19	183	100	29.8606	1	1	1		1			1	2	21:50	0	06:30:00	6.5	3	0	0	0	0	0	0	0	0	0	0	0	0	0	0	No	2	0	0	1	1	0	0	0	0	0	1
1	1521	Shandong	1	1	2	19	164	59	21.9363	1	1	1		1			3	1	21:30	3	06:40:00	5.5	2	3	0	3	3	3	0	0	0	0	0	1	3	0	0	No	15	3	3	2	3	1	0	3	0	0	0
1	1522	Shandong	1	5	2	20	160	56	21.875	1	1	1		1			2	1	23:30:00	0	06:45:00	6.5	3	2	0	2	2	0	2	0	0	2	0	0	3	0	3	Sickness	7	2	0	1	0	2	0	2	1	0	0
1	1523	Shandong	1	3	2	20	158	50	20.0288	1	1	1		1			1	1	23:00:00	1	06:55:00	6.5	3	2	0	1	1	1	1	1	0	0	0	0	1	0	0	No	7	2	1	1	1	1	0	1	0	0	0
2	1524	Shandong	1	1	1	20	184	88	25.9924	1	1	1		2	1	1	2	3	23:30:00	0	07:00:00	7.5	4	1	0	0	1	0	1	0	0	0	1	0	0	0	0	No	3	1	0	0	0	1	0	1	1	0	0
1	1525	Shandong	1	5	1	19	178	68	21.4619	1	1	1		1			2	1	23:00:00	0	07:00:00	6.5	3	1	0	1	1	1	0	0	0	0	0	0	0	0	0	No	5	1	1	1	1	0	0	1	1	1	1
2	1526	Shandong	1	5	2	19	160	50	19.5312	1	1	1		1			2	2	22:00:00	1	05:10:00	7.5	4	1	0	1	1	1	2	1	0	0	0	0	1	0	1	staying up late to work or study	4	1	1	0	0	1	0	1	0	0	0
1	1527	Shandong	1	3	2	19	166	58	21.048	1	1	1		1			2	3	22:15:00	0	6:00	5.5	2	1	0	3	1	0	2	0	0	0	0	0	1	0	0	No	8	1	0	2	2	1	0	2	0	0	0
1	1528	Shandong	1	3	2	19	162	48	18.2899	1	1	1		1			2	1	22:30:00	1	06:30:00	6.5	3	1	0	2	1	2	1	0	0	0	2	0	0	0	0	No	8	1	2	1	1	1	0	2	1	1	1
1	1529	Shandong	1	5	1	19	185	100	29.2184	1	1	1		1			2	1	21:00:00	2	6:00	5.5	2	3	0	3	3	3	3	0	0	0	3	0	1	0	0	No	15	3	3	2	3	1	0	3	1	1	0
1	1530	Shandong	1	3	2	20	163	56	21.0772	1	1	1		1			2	3	23:30:00	0	06:30:00	6.5	3	1	0	2	1	0	0	1	0	0	1	0	0	0	0	No	5	1	0	1	0	1	0	2	1	1	0
1	1531	Liaoning	1	1	2	19	165	47	17.2635	2	1	1		1			2	1	23:20:00	1	06:30:00	5.5	2	1	0	1	0	1	1	0	0	0	1	0	0	0	0	No	7	1	1	2	1	1	0	1	0	1	0
1	1532	Shandong	1	5	1	20	178	68.5	21.6197	1	1	1		1			1	3	23:40	0	6:50	6.5	3	2	0	2	1	0	0	0	0	3	0	0	0	0	3	repeated thoughts in bed	6	2	0	1	0	1	0	2	0	1	0
1	1533	Shandong	1	3	2	20	163	60	22.5827	1	1	1		1			1	1	23:30:00	2	06:30:00	6.5	3	2	0	1	1	2	2	1	0	0	0	0	1	0	0	No	7	2	2	1	0	1	0	1	0	1	0
2	1534	Shandong	1	3	2	19	169	60	21.0077	1	1	1		1			1	1	22:40:00	1	06:30:00	7.5	4	0	0	0	0	0	0	0	0	0	0	0	0	0	0	No	1	0	1	0	0	0	0	0	0	0	0
1	1535	Shandong	1	3	1	19	186	60	17.343	1	1	1		1			2	1	23:00:00	0	06:30:00	5.5	2	2	0	3	2	0	0	0	0	3	0	0	0	0	0	No	10	2	0	2	2	1	0	3	0	0	0
2	1536	Shandong	1	1	1	20	174	53	17.5056	1	1	1		2	2	5	3	1	22:30:00	0	07:00:00	7.5	4	1	0	2	1	0	0	0	0	1	0	0	2	0	0	No	4	1	0	0	0	1	0	2	1	0	0
1	1537	Shandong	1	3	2	20	170	55	19.0311	1	1	1		1			1	1	22:30:00	2	6:50	6.5	3	2	0	2	2	3	1	0	0	0	0	0	1	0	0	No	10	2	3	1	1	1	0	2	0	0	0
2	1538	Shandong	1	3	2	18	172	60	20.2812	1	1	1		1			3	3	22:10:00	1	06:30:00	7.5	4	1	0	1	2	0	0	0	0	3	2	0	3	3	0	No	6	1	1	0	0	2	0	2	1	0	0
2	1539	Shandong	1	6	2	19	155	66	27.4714	1	1	1		1			1	3	22:45	1	06:45:00	7.5	4	1	0	0	1	0	1	0	0	0	0	0	2	0	0	No	4	1	1	0	0	1	0	1	0	0	0
2	1540	Shandong	1	6	1	19	175	70	22.8571	1	1	1		1			3	1	22:40:00	0	06:30:00	7.5	4	1	0	0	1	0	0	0	0	0	0	0	0	0	0	No	2	1	0	0	0	0	0	1	0	0	0
1	1541	Shandong	1	6	2	19	160	60	23.4375	1	1	1		1			2	1	21:55:00	1	06:45:00	6.5	3	0	0	1	0	0	0	0	0	0	0	0	0	0	0	No	5	0	1	1	2	0	0	1	0	0	0
1	1542	Shandong	1	6	2	20	163	50	18.8189	1	1	1		1			2	3	22:30:00	2	06:30:00	6.5	3	1	0	0	1	0	0	1	0	0	0	0	0	0	0	No	6	1	1	1	1	1	0	1	1	0	0
1	1543	Shandong	1	4	1	20	170	100	34.6021	1	1	1		2	1	1	2	3	23:00:00	0	6:00	6.5	3	0	0	1	0	0	0	0	0	0	0	0	0	0	0	No	2	0	0	1	0	0	0	1	1	0	1
1	1544	Shandong	1	6	2	19	158	45	18.026	1	1	1		1			2	3	22:30:00	1	6:50	5.5	2	1	0	0	0	0	2	0	0	0	0	2	0	0	0	No	7	1	1	2	2	1	0	0	0	1	0
2	1545	Shandong	1	6	1	19	175	75	24.4898	1	1	1		1			2	3	22:30:00	1	07:00:00	7.5	4	3	0	3	2	0	1	1	0	1	2	0	0	0	0	No	8	3	1	0	0	1	0	3	1	0	0
1	1546	Shandong	1	6	1	19	180	72.5	22.3765	1	1	1		1			2	3	00:00:00	3	7:20	5.5	2	0	0	2	1	0	0	0	0	0	0	0	0	0	0	No	7	0	2	2	1	0	0	2	1	0	0
1	1547	Shandong	1	6	2	19	160	61	23.8281	1	1	1		1			2	1	21:35:00	1	06:35:00	5.5	2	1	0	2	1	1	1	0	0	0	1	0	0	0	0	No	10	1	1	2	3	1	0	2	1	1	1
2	1548	Shandong	1	4	2	19	164	51	18.9619	1	1	1		1			2	3	23:30:00	0	6:50	7.5	4	1	0	3	1	0	2	0	2	2	1	0	2	2	0	No	5	1	0	0	0	2	0	2	1	0	0
2	1549	Shandong	1	6	2	20	165	95	34.8944	1	1	1		1			1	3	22:00	0	06:30:00	7.5	4	0	0	0	0	0	0	0	0	0	0	0	0	0	0	No	0	0	0	0	0	0	0	0	0	0	1
1	1550	Shandong	1	6	2	20	160	43	16.7969	1	1	1		1			3	3	22:30:00	0	06:30:00	5.5	2	1	0	0	0	0	0	0	0	0	0	0	2	0	0	No	6	1	0	2	2	1	0	0	0	0	0
1	1551	Shandong	1	6	2	19	163	60	22.5827	1	1	1		1			2	3	00:00:00	3	06:45:00	5.5	2	0	0	2	1	0	0	0	0	0	1	1	0	0	3	taking time away from sleep for recreation	8	0	2	2	1	1	0	2	1	1	0
1	1552	Shandong	1	6	2	19	166	47	17.0562	1	1	1		1			2	3	22:15:00	1	05:40:00	6.5	3	1	0	2	1	1	3	0	0	0	0	0	3	0	0	No	6	1	1	1	0	1	0	2	1	0	0
2	1553	Shandong	1	6	2	20	160	60	23.4375	1	1	1		1			3	1	22:30:00	0	06:30:00	7.5	4	0	0	0	1	0	1	0	0	0	1	0	0	0	0	No	2	0	0	0	0	1	0	1	1	0	0
2	1554	Shandong	1	6	1	21	179	80	24.968	4	1	1		1			2	3	22:30:00	0	06:30:00	7.5	4	0	0	0	0	0	0	1	0	0	0	0	0	0	0	No	1	0	0	0	0	1	0	0	0	0	1
1	1555	Shandong	1	6	2	19	172	57	19.2672	1	1	1		1			2	3	23:00:00	0	06:40:00	6.5	3	0	0	0	1	0	2	0	0	0	0	0	0	0	0	No	3	0	0	1	0	1	0	1	1	0	1
1	1556	Shandong	1	6	2	19	167	53	19.0039	1	1	1		1			2	1	22:30:00	0	06:30:00	6.5	3	1	0	1	0	1	0	0	0	0	0	0	0	0	0	No	5	1	1	1	1	0	0	1	1	0	0
1	1557	Shandong	1	6	1	21	170	51	17.6471	1	1	1		2	2	2	1	1	00:00:00	1	6:05	4.5	1	2	0	3	2	2	2	1	1	3	2	2	0	3	0	No	14	2	2	3	2	2	0	3	1	1	1
1	1558	Shandong	1	6	2	19	160	57	22.2656	1	1	1		1			2	2	22:40:00	1	06:30:00	6.5	3	1	0	2	0	1	0	0	0	0	0	0	2	0	0	No	6	1	1	1	1	1	0	1	1	0	0
1	1559	Shandong	1	6	1	19	181	70	21.3669	1	1	1		1			2	1	23:30:00	0	6:50	5.5	2	1	0	1	1	0	0	0	0	0	0	0	0	0	0	No	5	1	0	2	1	0	0	1	1	0	1
1	1560	Shandong	1	4	2	20	160	49	19.1406	1	1	1		1			1	2	23:00:00	1	06:45:00	6.5	3	2	0	0	1	2	3	0	0	0	2	0	0	0	0	No	8	2	2	1	1	1	0	1	1	1	1
1	1561	Shandong	1	6	2	19	168	54	19.1327	1	1	1		1			2	2	22:50:00	1	06:35:00	5.5	2	1	0	2	0	0	0	0	0	0	0	0	0	0	0	No	7	1	1	2	2	0	0	1	0	1	0
2	1562	Shandong	1	4	1	19	190	95	26.3158	1	1	1		1			2	3	23:30:00	0	07:00:00	7.5	4	0	0	2	0	0	0	0	3	3	0	0	0	0	0	No	2	0	0	0	0	1	0	1	1	1	0
1	1563	Shandong	1	6	2	20	165	47	17.2635	1	1	1		1			2	1	21:40:00	3	06:40:00	5.5	2	2	0	0	1	3	3	0	0	0	0	0	1	0	2	relationship issues	12	2	3	2	3	1	0	1	0	0	0
1	1564	Shandong	1	6	2	19	168	69	24.4473	1	1	1		1			1	3	23:00:00	0	06:30:00	6.5	3	1	0	1	1	0	0	0	0	0	0	0	0	0	0	No	3	1	0	1	0	0	0	1	1	0	0
1	1565	Shandong	1	6	1	20	180	90	27.7778	1	1	1		2	1	1	2	3	23:00:00	1	6:20	6.5	3	1	0	2	1	1	1	0	0	3	0	0	1	0	0	No	6	1	1	1	0	1	0	2	1	0	0
1	1566	Shandong	1	6	2	21	174	53	17.5056	1	1	1		1			2	3	23:00:00	1	06:40:00	6.5	3	1	0	1	1	1	0	1	0	1	0	0	1	1	0	No	5	1	1	1	0	1	0	1	1	0	1
1	1567	Shandong	1	6	2	19	168	51.4	18.2115	1	1	1		1			2	3	22:50:00	0	06:30:00	6.5	3	1	0	3	3	1	2	2	0	0	2	0	0	0	0	No	7	1	1	1	0	1	0	3	1	1	0
1	1568	Shandong	1	6	2	20	160	57	22.2656	1	1	1		1			2	3	21:55:00	2	6:25	6.5	3	2	0	2	2	2	2	2	1	0	2	0	0	0	0	No	9	2	2	1	1	1	0	2	0	0	0
1	1569	Shandong	1	6	1	19	178	80	25.2493	1	1	1		1			1	3	23:00:00	1	06:30:00	6.5	3	2	0	3	2	2	3	0	0	0	0	0	0	0	3	the dormitory environment affects sleep	9	2	2	1	0	1	0	3	0	0	0
1	1570	Shandong	1	4	2	19	168	50	17.7154	1	1	1		1			1	3	22:00	3	06:40:00	5.5	2	3	0	3	1	3	3	3	3	2	3	2	2	2	3	relationship issues	16	3	3	2	3	3	0	2	0	0	0
2	1571	Shandong	1	6	2	19	162	68	25.9107	1	1	1		1			2	2	23:30:00	0	06:40:00	7.5	4	1	0	1	0	1	1	0	0	0	0	0	0	1	0	No	4	1	1	0	0	1	0	1	0	0	0
1	1572	Shandong	1	6	2	19	168	55	19.487	1	1	1		1			2	2	23:00:00	1	06:40:00	5.5	2	2	0	1	1	2	2	1	0	0	0	0	0	0	0	No	10	2	2	2	2	1	0	1	1	0	0
1	1573	Shandong	1	6	2	19	160	44.5	17.3828	1	1	1		1			1	2	23:30:00	0	6:50	6.5	3	1	0	1	1	1	0	0	0	0	0	0	3	0	0	No	5	1	1	1	0	1	0	1	1	0	0
1	1574	Shandong	1	6	2	20	170	70	24.2215	1	1	1		1			3	1	23:00:00	0	6:50	6.5	3	1	0	1	1	1	0	0	0	3	2	0	1	0	0	No	6	1	1	1	1	1	0	1	1	0	0
1	1575	Shandong	1	6	2	19	153	50.5	21.5729	1	1	1		1			1	3	23:30:00	0	6:50	6.5	3	1	0	3	1	0	0	0	0	0	3	0	2	0	0	No	5	1	0	1	0	1	0	2	1	1	1
1	1576	Shandong	1	4	2	19	162	54	20.5761	1	1	1		1			2	2	23:00:00	1	06:40:00	5.5	2	2	0	0	0	0	0	0	0	0	0	0	0	0	0	No	7	2	1	2	2	0	0	0	0	0	1
1	1577	Shandong	1	6	2	19	168	75	26.5731	1	1	1		1			2	3	00:00:00	0	6:50	6.5	3	1	0	0	1	1	1	1	0	0	0	1	1	0	1	relationship issues	5	1	1	1	0	1	0	1	1	0	0
2	1578	Shandong	1	6	2	19	166	85	30.8463	1	1	1		1			2	3	22:40:00	0	06:40:00	7.5	4	1	0	2	1	0	2	0	0	0	0	0	0	0	0	No	4	1	0	0	0	1	0	2	1	0	0
1	1579	Shandong	1	6	1	18	185	65	18.992	1	1	2	20	2	2	2	1	1	00:00:00	0	07:00:00	6.5	3	1	0	3	3	0	0	0	0	3	0	0	2	0	0	No	6	1	0	1	0	1	0	3	1	1	0
1	1580	Shandong	1	6	2	19	165	60	22.0386	1	1	1		1			2	1	23:00:00	0	06:30:00	5.5	2	1	0	1	1	0	0	0	1	0	0	0	1	0	0	No	7	1	0	2	2	1	0	1	1	0	0
1	1581	Shandong	1	6	2	19	156	51	20.9566	1	1	1		1			2	3	23:00:00	2	07:00:00	6.5	3	2	0	1	3	2	0	0	0	0	0	0	0	1	0	No	9	2	2	1	1	1	0	2	0	0	0
1	1582	Shandong	1	6	2	20	162	54.5	20.7667	1	1	1		1			2	3	23:20:00	3	06:30:00	6.5	3	2	0	2	1	2	2	1	1	0	1	0	0	1	1	mood problems	9	2	3	1	0	1	0	2	1	0	0
2	1583	Shandong	1	6	2	20	160	50	19.5312	1	1	1		1			1	3	23:00:00	0	6:50	7.5	4	0	0	0	0	0	0	0	0	0	0	0	0	0	0	No	0	0	0	0	0	0	0	0	1	0	1
2	1584	Shandong	1	6	1	19	176	59	19.047	1	1	1		1			1	1	23:00:00	0	06:45:00	7.5	4	1	0	2	0	0	0	0	0	0	0	1	0	0	0	No	3	1	0	0	0	1	0	1	1	0	0
1	1585	Shandong	1	6	2	18	158	51	20.4294	1	1	1		1			2	1	22:30:00	2	06:30:00	6.5	3	1	0	2	0	1	2	1	0	0	0	0	0	0	0	No	7	1	2	1	1	1	0	1	0	1	0
2	1586	Shandong	1	6	1	18	172	52	17.5771	1	1	1		1			3	3	23:00:00	1	07:00:00	7.5	4	1	0	0	0	0	0	0	0	0	0	0	0	0	0	No	2	1	1	0	0	0	0	0	0	0	0
1	1587	Shandong	1	6	1	18	170	85	29.4118	1	1	1		2	1	1	3	3	23:00:00	0	06:35:00	6.5	3	0	0	2	1	0	0	0	0	1	1	0	0	0	0	No	4	0	0	1	0	1	0	2	1	1	0
1	1588	Shandong	1	6	2	18	163	58	21.83	1	1	1		1			2	1	23:00:00	0	06:40:00	6.5	3	1	0	2	1	0	0	0	1	1	0	0	0	0	0	No	5	1	0	1	0	1	0	2	1	0	1
2	1589	Shandong	1	6	1	18	171	64	21.8871	1	1	1		1			1	3	23:00:00	0	06:30:00	7.5	4	0	0	1	1	0	0	0	0	0	0	0	0	0	0	No	1	0	0	0	0	0	0	1	0	0	1
1	1590	Shandong	1	4	1	19	183	60	17.9163	1	1	1		1			3	1	23:00:00	0	06:30:00	6.5	3	1	0	1	1	0	0	1	0	0	0	0	0	0	0	No	4	1	0	1	0	1	0	1	0	0	0
1	1591	Shandong	1	6	2	19	168	65	23.03	1	1	1		1			3	3	21:50	3	06:30:00	5.5	2	2	0	3	1	2	0	0	0	0	0	0	0	0	0	No	12	2	3	2	3	0	0	2	1	0	0
1	1592	Shandong	1	6	2	19	165	52	19.1001	1	1	1		1			3	3	23:30:00	1	06:30:00	5.5	2	2	0	3	2	2	0	0	0	0	3	0	0	0	0	No	11	2	2	2	1	1	0	3	1	1	0
1	1593	Shandong	1	6	2	19	169	69	24.1588	1	1	1		1			3	2	23:30:00	0	06:30:00	6.5	3	1	0	3	1	1	1	1	0	0	1	1	1	0	0	No	6	1	1	1	0	1	0	2	0	0	1
1	1594	Shandong	1	4	1	19	179	96	29.9616	1	1	1		1			3	1	22:10:00	2	06:45:00	6.5	3	2	0	1	1	2	0	0	0	0	2	0	0	0	0	No	8	2	2	1	1	1	0	1	0	0	0
1	1595	Shandong	1	6	2	19	166	70	25.4028	1	1	1		1			1	1	22:50:00	1	06:40:00	6.5	3	1	0	2	2	2	1	0	1	0	0	2	1	0	2	staying up late to work or study	8	1	2	1	1	1	0	2	1	0	1
2	1596	Shandong	1	6	2	18	163	58	21.83	1	1	1		1			3	3	23:00:00	3	06:35:00	7.5	4	1	0	2	1	2	3	2	0	0	2	0	2	2	0	No	8	1	3	0	0	2	0	2	1	0	0
1	1597	Shandong	1	6	2	19	170	74	25.6055	1	1	1		1			2	3	23:10:00	3	6:50	6.5	3	1	0	2	1	2	1	0	0	0	0	0	0	0	0	No	8	1	3	1	0	1	0	2	1	0	0
1	1598	Shandong	1	6	1	19	176	90	29.0548	1	1	1		1			3	3	01:00:00	0	06:40:00	5.5	2	1	0	2	1	0	0	1	0	0	0	0	1	0	0	No	6	1	0	2	0	1	0	2	1	0	1
2	1599	Shandong	1	6	2	19	163	55	20.7008	1	1	1		1			3	3	21:30	1	06:40:00	7.5	4	1	0	1	0	0	0	1	0	0	0	0	0	0	0	No	5	1	1	0	1	1	0	1	1	0	0
2	1600	Shandong	1	6	2	19	174	58	19.1571	1	1	1		1			3	3	22:40:00	0	06:30:00	7.5	4	0	0	1	1	0	0	0	0	2	0	0	0	0	0	No	2	0	0	0	0	1	0	1	0	0	0
1	1601	Shandong	1	6	2	19	168	65	23.03	1	1	1		1			3	3	23:00:00	3	06:40:00	6.5	3	1	0	1	1	1	2	1	0	1	2	0	1	0	0	No	6	1	2	1	0	1	0	1	1	0	0
2	1602	Shandong	1	6	1	19	190	56	15.5125	1	1	1		1			3	3	23:00:00	0	06:40:00	8.5	5	0	0	0	0	0	0	0	0	0	0	0	0	0	0	No	0	0	0	0	0	0	0	0	1	0	0
1	1603	Shandong	1	6	2	18	162	42	16.0037	1	1	1		1			3	3	22:50:00	1	6:20	6.5	3	1	0	2	1	2	3	3	2	1	0	0	1	0	0	No	8	1	2	1	0	2	0	2	0	0	0
1	1604	Shandong	1	6	2	19	178	80	25.2493	1	1	1		1			3	3	22:40:00	0	6:20	6.5	3	1	0	1	0	0	0	0	0	1	0	0	1	1	0	No	4	1	0	1	0	1	0	1	0	0	1
1	1605	Shandong	1	6	2	19	172	70	23.6614	1	1	1		2	1	1	1	3	22:30:00	3	06:40:00	6.5	3	2	0	1	1	2	2	1	0	0	2	0	0	0	0	No	9	2	3	1	1	1	0	1	0	0	0
1	1606	Shandong	1	6	1	20	178	80	25.2493	1	1	1		1			3	3	23:00:00	1	5:00	4.5	1	1	0	2	1	0	2	2	1	0	0	0	2	0	1	the dormitory environment affects sleep	9	1	1	3	1	1	0	2	0	0	1
1	1607	Shandong	1	6	2	19	169	60	21.0077	1	1	1		1			2	1	22:50:00	0	06:40:00	6.5	3	1	0	0	1	1	2	1	0	1	0	0	0	0	0	No	6	1	1	1	1	1	0	1	1	0	0
1	1608	Shandong	1	4	2	21	177	63	20.1092	1	1	1		1			3	1	22:30:00	0	06:30:00	6.5	3	1	0	0	0	0	1	0	0	0	0	0	0	0	0	No	4	1	0	1	1	1	0	0	0	0	1
1	1609	Shandong	1	6	2	19	165	56	20.5693	1	1	1		1			3	1	22:00	0	06:55:00	6.5	3	1	0	3	2	0	0	1	0	0	1	0	0	0	1	the dormitory environment affects sleep	8	1	0	1	2	1	0	3	1	0	1
1	1610	Shandong	1	6	2	18	166	49	17.782	1	1	1		1			1	3	23:00:00	2	6:00	6.5	3	2	3	3	3	3	1	3	0	0	3	3	2	0	3	stressed out state	14	2	3	1	0	2	3	3	1	1	0
1	1611	Shandong	1	4	2	22	160	67	26.1719	1	1	1		1			4	3	22:45:00	0	06:45:00	6.5	3	2	0	3	3	0	3	3	0	0	0	0	0	0	0	No	8	2	0	1	1	1	0	3	0	0	0
1	1612	Shandong	1	6	1	19	175	82.5	26.9388	1	1	1		1			2	3	23:00:00	1	06:50:00	6.5	3	0	0	0	0	0	0	0	0	0	0	0	0	0	0	No	3	0	1	1	1	0	0	0	0	0	0
1	1613	Shandong	1	6	2	18	167	55.5	19.9003	1	1	1		1			1	3	23:00:00	0	6:20	5.5	2	1	0	2	2	0	0	2	0	3	2	0	0	0	0	No	7	1	0	2	1	1	0	2	1	1	0
2	1614	Shandong	1	6	1	17	183	57.5	17.1698	1	1	1		1			2	1	22:30:00	1	7:30	8.5	5	1	0	1	0	0	0	0	0	0	0	0	0	0	0	No	3	1	1	0	0	0	0	1	1	0	0
1	1615	Shandong	1	6	2	19	158	55	22.0317	1	1	1		1			3	3	23:30:00	3	06:30:00	5.5	2	3	0	3	3	3	1	0	1	1	0	1	1	1	1	Sickness	13	3	3	2	1	1	0	3	0	0	0
2	1616	Shandong	1	6	2	19	165	45	16.5289	1	1	1		1			1	3	23:00:00	0	6:25	7.5	4	1	0	0	2	0	1	0	0	0	0	0	0	0	0	No	3	1	0	0	0	1	0	1	1	0	0
1	1617	Shandong	1	6	1	20	175	56	18.2857	1	1	1		1			3	1	23:00:00	1	06:30:00	6.5	3	2	0	3	1	1	1	0	0	0	0	0	0	0	0	No	7	2	1	1	0	1	0	2	0	1	0
1	1618	Shandong	1	6	2	20	166	56	20.3223	1	1	1		1			1	1	22:30:00	1	06:40:00	6.5	3	1	0	1	0	1	3	3	0	0	0	0	1	0	0	No	6	1	1	1	1	1	0	1	0	0	0
1	1619	Shandong	1	6	2	20	165	50	18.3655	1	1	1		1			2	1	23:00:00	0	6:50	6.5	3	1	0	1	1	1	1	0	0	0	0	0	0	0	0	No	6	1	1	1	1	1	0	1	1	0	0
2	1620	Beijing	2	6	2	18	165	50	18.3655	1	1	1		1			4	3	22:40:00	0	06:29:00	7.5	4	0	0	1	1	1	0	0	0	0	0	0	1	0	0	No	3	0	1	0	0	1	0	1	1	0	1
1	1621	Shandong	1	1	2	20	162	66	25.1486	1	1	1		1			2	3	22:00	1	06:30:00	5.5	2	2	0	2	2	2	2	1	1	1	2	1	1	1	1	No	12	2	2	2	2	2	0	2	0	0	0
1	1622	Shandong	1	1	1	18	180	65	20.0617	1	1	1		1			3	3	23:30:00	0	6:00	4.5	1	2	0	3	1	0	1	0	0	0	2	0	0	0	0	No	10	2	0	3	2	1	0	2	1	0	0
1	1623	Shandong	1	2	1	19	182	80	24.1517	1	1	1		1			1	3	23:00:00	1	07:00:00	6.5	3	2	0	3	3	3	3	2	0	0	2	0	1	0	2	the dormitory environment affects sleep	11	2	2	1	1	2	0	3	1	0	0
1	1624	Shandong	1	1	2	19	158	46	18.4265	1	1	1		1			1	1	23:00:00	1	06:30:00	6.5	3	1	0	2	2	1	1	1	0	0	1	0	1	0	0	No	6	1	1	1	0	1	0	2	0	0	0
2	1625	Shandong	1	3	2	19	165	55	20.202	1	1	1		1			1	3	22:45	0	06:38:00	7.5	4	0	0	0	1	0	0	0	0	0	1	0	0	0	0	No	2	0	0	0	0	1	0	1	0	0	1
1	1626	Shandong	1	1	2	20	160	45	17.5781	1	1	1		1			3	1	23:00:00	2	06:40:00	6.5	3	2	0	3	1	3	3	0	0	0	0	0	2	1	3	the dormitory environment affects sleep	9	2	3	1	0	1	0	2	0	0	0
1	1627	Shandong	1	2	2	20	165	50	18.3655	1	1	2	2	2	2	2	2	1	23:00:00	3	06:40:00	6.5	3	0	0	0	1	0	1	0	0	0	0	2	0	0	0	No	5	0	2	1	0	1	0	1	1	0	0
2	1628	Shandong	1	1	1	19	192	86	23.329	1	1	1		2	1	1	3	2	23:00:00	0	07:00:00	7.5	4	1	0	1	1	0	0	1	0	0	0	0	0	0	0	No	3	1	0	0	0	1	0	1	1	0	1
1	1629	Shanghai	2	2	1	22	188	70	19.8053	1	1	2	10	1			3	3	23:30:00	1	07:00:00	6.5	3	1	0	1	1	0	0	1	0	3	3	1	1	0	0	No	5	1	1	1	0	1	0	1	0	1	1
1	1630	Shandong	1	3	2	20	160	60	23.4375	1	1	1		1			1	3	21:40:00	2	06:30:00	6.5	3	2	0	2	1	2	2	0	0	0	0	0	0	0	0	No	10	2	2	1	2	1	0	2	0	1	0
1	1631	Shandong	1	1	2	19	170	85	29.4118	1	1	1		1			1	1	23:00:00	1	06:30:00	6.5	3	1	0	3	1	3	1	1	0	2	0	0	2	0	0	No	7	1	2	1	0	1	0	2	1	1	0
1	1632	Shandong	1	2	2	20	160	42	16.4062	1	1	1		1			3	1	23:00:00	1	06:30:00	6.5	3	0	0	0	0	0	0	0	0	0	0	0	0	0	0	No	2	0	1	1	0	0	0	0	1	0	0
1	1633	Shandong	1	1	2	20	156	45	18.4911	1	1	1		1			3	1	23:00:00	1	06:30:00	6.5	3	1	0	0	0	0	0	0	0	0	0	0	0	0	0	No	3	1	1	1	0	0	0	0	1	0	0
1	1634	Shandong	1	2	2	18	172	70	23.6614	1	1	1		1			2	3	23:00:00	3	06:30:00	5.5	2	2	0	0	1	1	2	1	0	0	0	0	1	1	0	No	10	2	2	2	2	1	0	1	1	1	0
2	1635	Shandong	1	1	1	20	180	90	27.7778	1	1	1		1			1	3	23:30:00	3	06:45:00	7.5	4	3	0	3	3	3	0	0	3	1	0	0	0	0	0	No	10	3	3	0	0	1	0	3	1	0	0
1	1636	Shandong	1	3	2	18	165	53	19.4674	1	1	1		1			4	1	23:00:00	1	06:30:00	6.5	3	2	0	3	2	2	2	2	2	0	1	0	0	0	0	No	9	2	2	1	0	1	0	3	0	0	1
1	1637	Shandong	1	1	1	20	183	63	18.8121	1	1	1		1			4	1	22:30:00	2	06:30:00	6.5	3	2	0	1	1	3	2	1	0	0	0	0	0	0	2	the dormitory environment affects sleep	9	2	3	1	1	1	0	1	0	0	0
1	1638	Shandong	1	3	2	20	170	53	18.3391	1	1	1		1			3	3	22:30:00	2	6:00	6.5	3	1	0	1	1	2	1	1	0	0	0	1	0	1	0	No	6	1	2	1	0	1	0	1	0	0	1
2	1639	Shandong	1	1	1	20	180	80	24.6914	1	1	1		1			2	1	23:00:00	2	06:40:00	7.5	4	0	0	0	0	2	0	0	0	0	0	0	0	0	0	No	2	0	2	0	0	0	0	0	0	0	0
1	1640	Shandong	1	2	2	19	162	75	28.578	1	1	1		1			3	3	22:40:00	3	06:30:00	6.5	3	1	0	2	1	0	2	1	1	3	3	0	0	0	0	No	9	1	2	1	1	2	0	2	1	0	0
2	1641	Shandong	1	1	2	19	172	60	20.2812	1	1	1		1			1	1	23:00:00	0	6:50	7.5	4	1	0	2	1	1	0	0	0	0	1	1	0	0	0	No	5	1	1	0	0	1	0	2	0	0	0
2	1642	Shandong	1	1	2	19	163	50	18.8189	1	1	1		1			3	1	22:30:00	0	6:10	7.5	4	0	0	0	0	0	0	0	0	0	0	0	0	0	0	No	0	0	0	0	0	0	0	0	0	0	0
1	1643	Shandong	1	1	2	19	163	56	21.0772	1	1	1		1			2	2	22:50:00	0	6:25	6.5	3	1	0	2	0	2	1	0	0	0	1	0	0	1	0	No	5	1	1	1	0	1	0	1	1	0	0
1	1644	Shandong	1	2	1	19	183	85	25.3815	1	1	1		1			4	3	23:00:00	2	06:30:00	5.5	2	1	0	3	0	3	0	1	0	3	3	0	0	0	0	No	11	1	3	2	2	1	0	2	1	0	0
1	1645	Zhejiang	1	1	1	18	180	57	17.5926	1	1	1		1			4	1	22:30:00	0	06:40:00	6.5	3	1	0	2	0	0	0	0	0	0	0	0	0	0	0	No	4	1	0	1	1	0	0	1	1	0	0
1	1646	Shandong	1	3	2	19	161	46	17.7462	1	1	1		1			2	3	23:00:00	1	6:20	3.5	1	2	0	3	0	1	2	1	0	0	2	0	1	1	0	No	12	2	1	3	3	1	0	2	1	1	0
2	1647	Shandong	1	1	2	18	165	53	19.4674	1	1	1		1			3	1	22:30:00	1	06:40:00	7.5	4	0	0	0	0	0	0	0	0	0	0	0	0	0	0	No	1	0	1	0	0	0	0	0	1	0	0
1	1648	Shandong	1	1	1	18	175	55	17.9592	1	1	1		1			1	1	23:30:00	0	06:27:00	5.5	2	1	0	0	0	0	0	3	0	0	0	0	0	0	0	No	5	1	0	2	1	1	0	0	1	0	1
2	1649	Shandong	1	1	2	20	155	52.5	21.8522	1	1	1		1			3	1	23:00:00	0	6:50	7.5	4	1	0	3	1	1	2	2	1	1	3	0	0	0	0	No	5	1	1	0	0	1	0	2	1	1	0
1	1650	Shandong	1	3	2	20	158	44	17.6254	1	1	1		1			4	1	22:30:00	2	06:40:00	6.5	3	2	0	3	2	3	2	1	0	0	2	0	1	1	2	No	11	2	3	1	1	1	0	3	1	0	0
1	1651	Shandong	1	1	2	18	162	60	22.8624	1	1	1		1			2	3	22:40:00	0	6:20	6.5	3	1	0	1	1	0	0	1	0	0	2	0	0	0	0	No	4	1	0	1	0	1	0	1	1	0	0
1	1652	Shandong	1	1	1	19	170	61	21.1073	1	1	1		1			3	1	00:00:00	0	06:45:00	6.5	3	0	0	2	1	0	3	0	0	1	2	2	1	0	0	No	4	0	0	1	0	1	0	2	1	1	0
2	1653	Shandong	1	3	2	18	172	55	18.5911	1	1	1		1			2	1	22:40:00	0	6:20	7.5	4	0	0	0	0	0	0	0	0	0	1	0	1	0	0	No	1	0	0	0	0	1	0	0	1	1	1
1	1654	Shandong	1	1	2	18	168	49	17.3611	1	1	1		1			3	3	23:40	3	06:30:00	6.5	3	1	0	2	1	2	2	2	0	0	0	2	2	0	0	No	8	1	3	1	0	1	0	2	1	1	0
2	1655	Shandong	1	1	2	17	168	60	21.2585	1	1	1		1			4	1	23:30:00	2	6:20	7.5	4	2	0	2	1	0	2	0	0	0	2	0	0	0	0	No	6	2	1	0	0	1	0	2	1	0	0
1	1656	Shandong	1	2	2	19	163	60	22.5827	1	1	1		1			2	3	23:30:00	1	06:30:00	6.5	3	1	0	2	1	1	0	0	0	0	1	0	0	0	0	No	6	1	1	1	0	1	0	2	1	1	0
1	1657	Shandong	1	1	1	18	175	80	26.1224	2	1	1		1			1	3	23:00:00	0	06:30:00	5.5	2	1	0	0	0	0	0	0	0	0	0	0	0	0	0	No	5	1	0	2	2	0	0	0	0	0	1
2	1658	Shandong	1	2	1	19	176	52	16.7872	1	1	1		1			3	3	22:40:00	2	06:30:00	7.5	4	2	0	3	1	2	3	3	0	0	0	0	3	0	0	No	7	2	2	0	0	1	0	2	0	0	0
1	1659	Shandong	1	1	1	19	185	100	29.2184	1	1	1		1			1	3	23:30:00	0	07:15:00	6.5	3	1	0	3	2	2	0	1	0	2	2	0	0	0	0	No	8	1	1	1	1	1	0	3	1	0	0
1	1660	Shandong	1	3	2	19	164	53	19.7055	1	1	2	1	2	1	1	2	3	23:00:00	1	06:30:00	6.5	3	1	0	1	1	1	3	3	1	0	0	2	0	0	0	No	5	1	1	1	0	1	0	1	1	0	0
1	1661	Shandong	1	1	2	19	172	70	23.6614	1	1	1		1			4	1	23:30:00	3	06:35:00	5.5	2	2	0	3	3	2	2	3	3	2	2	2	2	1	0	No	13	2	3	2	1	2	0	3	1	1	0
1	1662	Shandong	1	1	1	20	169	80	28.0102	1	1	1		1			3	1	23:00:00	1	07:00:00	6.5	3	3	0	3	3	3	3	3	0	3	3	0	2	0	3	the dormitory environment affects sleep	12	3	2	1	1	2	0	3	1	0	0
1	1663	Shandong	1	1	2	18	171	65	22.2291	1	1	1		1			3	3	23:40	1	6:20	5.5	2	1	1	2	0	2	0	1	0	0	0	0	1	0	0	No	9	1	2	2	1	1	1	1	1	1	0
1	1664	Shandong	1	3	2	19	170	51	17.6471	1	1	1		1			1	1	23:00:00	2	06:30:00	6.5	3	1	0	3	1	1	1	0	0	0	0	0	1	1	0	No	7	1	2	1	0	1	0	2	1	0	0
1	1665	Shandong	1	1	2	18	160	60	23.4375	1	1	1		1			4	3	23:00:00	0	6:00	6.5	3	1	0	1	1	0	2	0	0	0	1	0	0	0	0	No	4	1	0	1	0	1	0	1	0	0	0
1	1666	Shandong	1	1	2	19	171	72	24.623	1	1	1		1			3	1	23:00:00	2	06:35:00	6.5	3	2	0	3	1	0	0	0	0	0	3	0	0	0	0	No	7	2	1	1	0	1	0	2	0	1	0
1	1667	Shandong	1	1	2	19	170	65	22.4913	1	1	1		1			4	3	23:00:00	1	6:00	5.5	2	1	0	2	1	1	0	0	0	1	0	0	1	1	2	the dormitory environment affects sleep	8	1	1	2	1	1	0	2	1	0	1
1	1668	Shandong	1	2	2	18	165	47	17.2635	1	1	1		1			1	3	23:00:00	0	6:00	6.5	3	1	0	2	1	0	0	0	0	0	1	1	0	0	0	No	5	1	0	1	0	1	0	2	1	0	0
1	1669	Shandong	1	1	2	20	160	48	18.75	1	1	1		1			3	1	22:40:00	0	06:30:00	6.5	3	1	0	2	1	1	0	0	0	0	1	0	0	0	1	staying up late to work or study	7	1	1	1	1	1	0	2	0	0	1
1	1670	Shandong	1	3	1	20	175	65	21.2245	1	1	1		1			2	1	22:30:00	0	06:30:00	6.5	3	1	0	0	0	0	0	0	0	0	0	0	0	0	0	No	3	1	0	1	1	0	0	0	1	0	1
1	1671	Shandong	1	1	1	19	175	57.5	18.7755	1	1	1		1			2	1	22:30:00	0	06:40:00	6.5	3	1	0	1	0	1	0	0	0	0	0	0	0	0	0	No	5	1	1	1	1	0	0	1	1	0	0
2	1672	Shandong	1	1	2	19	166	96	34.8381	1	1	1		1			2	1	00:00:00	3	06:30:00	7.5	4	1	0	0	0	0	1	0	0	0	0	0	0	0	0	No	4	1	2	0	0	1	0	0	1	0	0
1	1673	Shandong	1	1	1	19	170	65	22.4913	1	1	1		1			4	3	21:50	1	6:20	6.5	3	1	0	3	1	0	0	2	0	0	0	0	0	0	0	No	7	1	1	1	1	1	0	2	1	0	0
1	1674	Shandong	1	1	2	20	168	60	21.2585	1	1	1		1			3	2	23:00:00	2	6:15	5.5	2	1	0	1	0	1	0	0	0	1	1	1	1	0	0	No	8	1	2	2	1	1	0	1	1	1	1
2	1675	Shandong	1	1	2	19	160.4	48	18.6566	1	1	1		1			3	1	22:20:00	0	6:00	7.5	4	1	0	1	0	0	0	0	0	0	0	0	0	0	0	No	2	1	0	0	0	0	0	1	0	0	0
1	1676	Shandong	1	3	1	19	177	66.5	21.2263	1	1	2	6	2	3	1	1	1	23:30:00	1	06:45:00	6.5	3	1	0	1	0	2	0	0	0	0	0	0	0	0	0	No	5	1	2	1	0	0	0	1	0	0	0
1	1677	Shandong	1	1	2	20	168	58	20.5499	1	1	1		1			1	1	23:00:00	1	06:30:00	6.5	3	1	0	2	1	1	1	0	0	0	0	0	0	0	0	No	6	1	1	1	0	1	0	2	1	1	1
2	1678	Shandong	1	1	2	18	161	64	24.6904	1	1	1		1			4	1	21:50	1	06:40:00	7.5	4	0	0	0	0	0	1	1	0	1	0	0	0	0	0	No	2	0	1	0	0	1	0	0	1	0	0
1	1679	Shandong	1	1	2	18	163	65	24.4646	1	1	1		1			4	3	22:30:00	0	6:00	6.5	3	1	0	0	0	0	1	1	1	0	0	0	0	0	0	No	3	1	0	1	0	1	0	0	0	0	0
2	1680	Shandong	1	1	2	19	160	40	15.625	1	1	1		1			4	1	23:00:00	1	06:40:00	7.5	4	1	0	1	1	1	0	0	0	0	0	0	0	0	0	No	3	1	1	0	0	0	0	1	1	0	0
1	1681	Shandong	1	1	1	18	186	75	21.6788	1	1	1		1			2	1	23:00:00	1	06:30:00	5.5	2	2	0	3	1	1	1	0	0	0	1	0	0	1	0	No	10	2	1	2	2	1	0	2	0	0	1
1	1682	Shandong	1	3	2	19	164	60	22.3081	1	1	1		1			3	3	21:55:00	3	06:30:00	6.5	3	0	0	1	1	1	0	1	0	0	0	0	0	0	0	No	6	0	2	1	1	1	0	1	0	1	1
1	1683	Shandong	1	2	2	18	163	50	18.8189	1	1	1		1			1	3	21:50	3	6:20	6.5	3	2	0	2	1	2	2	1	0	0	1	0	1	1	0	No	10	2	3	1	1	1	0	2	1	0	0
1	1684	Shandong	1	1	2	19	168	65	23.03	1	1	1		1			2	2	00:00:00	0	06:35:00	5.5	2	2	0	0	1	0	1	0	0	2	0	0	0	1	1	taking time away from sleep for recreation	7	2	0	2	1	1	0	1	1	0	1
2	1685	Shandong	1	1	2	19	168	70	24.8016	1	1	1		1			2	3	23:30:00	2	6:50	7.5	4	2	0	2	1	1	2	0	0	2	0	2	3	0	0	No	7	2	2	0	0	1	0	2	1	1	0
1	1686	Shandong	1	1	2	18	168	56	19.8413	1	1	1		1			2	1	22:00	2	6:20	6.5	3	1	0	1	0	0	0	0	0	0	0	0	0	0	0	No	5	1	1	1	1	0	0	1	1	0	0
1	1687	Shandong	1	3	1	20	184	65	19.199	1	1	1		1			2	1	23:15:00	2	06:55:00	6.5	3	1	0	1	0	1	0	0	0	0	1	0	0	0	0	No	6	1	2	1	0	1	0	1	1	1	1
1	1688	Shandong	1	2	1	19	176	65	20.984	1	1	1		1			2	1	23:00:00	0	06:30:00	6.5	3	1	0	2	1	0	2	1	0	0	0	0	0	0	3	the dormitory environment affects sleep	5	1	0	1	0	1	0	2	1	0	0
1	1689	Shandong	1	1	1	20	173	70	23.3887	1	1	1		1			1	3	23:00:00	0	06:40:00	6.5	3	1	0	2	1	1	0	0	0	0	0	0	0	0	0	No	5	1	1	1	0	0	0	2	0	0	1
1	1690	Shandong	1	6	2	18	162	52	19.8141	1	1	1		1			2	1	22:40:00	0	6:20	6.5	3	1	0	1	1	0	0	1	0	1	0	0	0	0	0	No	4	1	0	1	0	1	0	1	0	0	1
1	1691	Shandong	1	1	1	19	178	55	17.3589	1	1	1		2	1	1	1	1	23:30:00	0	06:40:00	6.5	3	1	0	3	2	1	0	0	0	3	0	0	1	0	0	No	7	1	1	1	0	1	0	3	1	1	1
1	1692	Shandong	1	1	2	20	172	53	17.9151	1	1	1		1			4	3	23:00:00	0	6:15	6.5	3	1	0	2	1	0	0	0	0	0	0	0	0	0	0	No	4	1	0	1	0	0	0	2	1	0	0
1	1693	Shandong	1	6	2	19	158	50	20.0288	1	1	1		1			2	1	23:00:00	1	6:00	5.5	2	1	0	0	1	0	0	2	0	0	0	0	0	0	0	No	7	1	1	2	1	1	0	1	1	0	1
1	1694	Shandong	1	3	1	19	178	72	22.7244	1	1	1		2	1	5	1	3	00:30:00	3	07:00:00	5.5	2	2	2	1	1	3	3	2	0	0	1	0	1	0	0	No	11	2	3	2	0	1	2	1	1	0	1
1	1695	Shandong	1	1	2	19	165	60	22.0386	1	1	1		1			1	3	23:00:00	0	6:50	5.5	2	1	0	1	0	0	0	0	0	0	0	1	0	0	0	No	7	1	0	2	2	1	0	1	0	0	0
2	1696	Shandong	1	1	2	20	160	55	21.4844	1	1	1		1			2	3	22:35	0	06:30:00	7.5	4	1	0	0	0	0	0	0	0	0	0	0	0	0	0	No	1	1	0	0	0	0	0	0	0	0	0
1	1697	Shandong	1	1	2	20	170	60	20.7612	1	1	1		1			3	1	23:00:00	0	06:30:00	6.5	3	1	0	1	1	1	1	0	0	0	1	0	0	0	0	No	5	1	1	1	0	1	0	1	1	0	0
2	1698	Shandong	1	6	2	18	172	85	28.7317	1	1	1		1			3	1	21:55:00	0	06:30:00	7.5	4	1	0	1	1	0	0	0	1	2	0	0	0	1	0	No	3	1	0	0	0	1	0	1	1	0	0
2	1699	Shandong	1	1	2	19	160	50	19.5312	1	1	1		1			3	3	22:30:00	0	06:30:00	7.5	4	0	0	0	0	0	0	0	0	0	0	0	0	0	0	No	0	0	0	0	0	0	0	0	0	1	0
1	1700	Shandong	1	1	1	19	179	65	20.2865	1	1	1		1			4	2	22:50:00	0	06:30:00	6.5	3	1	0	2	1	0	0	3	0	0	2	0	0	0	0	No	5	1	0	1	0	1	0	2	1	1	0
1	1701	Shandong	1	2	2	18	160	75	29.2969	1	1	1		1			1	1	23:00:00	0	6:00	6.5	3	0	0	1	0	0	0	1	1	0	0	0	1	1	0	No	3	0	0	1	0	1	0	1	1	0	1
2	1702	Shandong	1	1	2	18	165	62	22.7732	1	1	1		1			1	3	22:30:00	0	06:30:00	7.5	4	0	0	1	1	0	0	0	0	0	0	0	0	0	0	No	1	0	0	0	0	0	0	1	1	1	0
1	1703	Shandong	1	1	2	19	163	63	23.7118	1	1	1		1			2	3	22:10:00	0	6:10	5.5	2	0	0	0	0	0	0	0	0	0	0	0	0	0	0	No	4	0	0	2	2	0	0	0	1	0	0
1	1704	Shandong	1	1	2	18	167	52	18.6453	1	1	1		1			2	3	23:20:00	2	6:50	6.5	3	0	0	2	1	0	0	1	0	0	0	0	0	0	0	No	5	0	1	1	0	1	0	2	1	0	0
1	1705	Shandong	1	2	2	20	155	50	20.8117	1	1	1		1			1	1	21:40:00	2	06:30:00	6.5	3	0	0	0	0	0	0	0	0	0	0	0	0	0	0	No	4	0	1	1	2	0	0	0	0	1	0
1	1706	Shandong	1	1	2	18	163	62	23.3355	1	1	1		1			2	1	23:00:00	1	6:00	4.5	1	1	0	1	1	1	1	0	0	0	0	0	1	0	0	No	10	1	1	3	3	1	0	1	1	0	0
1	1707	Shandong	1	1	1	19	179	75	23.4075	1	2	1		1			2	1	00:00:00	0	06:40:00	6.5	3	1	0	2	1	0	2	0	0	0	3	0	0	0	0	No	5	1	0	1	0	1	0	2	0	1	0
1	1708	Shandong	1	6	1	19	175	55	17.9592	1	1	1		1			1	3	23:05	0	06:30:00	6.5	3	1	0	3	0	0	0	0	0	0	0	0	0	0	0	No	4	1	0	1	0	0	0	2	1	0	1
1	1709	Shandong	1	1	1	18	192	75	20.3451	1	1	1		1			1	3	23:00:00	2	06:30:00	5.5	2	3	0	3	2	3	2	0	2	0	3	0	0	1	3	No	15	3	3	2	2	2	0	3	1	0	1
2	1710	Shandong	1	1	2	18	160	57	22.2656	1	1	1		1			1	1	23:00:00	1	06:40:00	7.5	4	1	0	2	0	0	1	0	0	0	0	0	1	0	0	No	4	1	1	0	0	1	0	1	1	0	0
1	1711	Shandong	1	2	1	20	178	86	27.143	1	1	1		2	2	1	3	3	23:30:00	1	07:00:00	5.5	2	2	0	1	1	0	0	1	0	0	0	0	0	0	0	No	9	2	1	2	2	1	0	1	1	1	0
1	1712	Shandong	1	1	1	22	170	55	19.0311	1	1	1		1			1	1	22:30:00	1	06:40:00	6.5	3	0	0	1	1	1	0	1	0	0	0	0	0	0	0	No	5	0	1	1	1	1	0	1	1	0	0
1	1713	Shandong	1	1	2	19	166	48	17.4191	1	1	1		1			3	1	23:15:00	1	6:20	5.5	2	2	0	2	1	2	0	0	0	0	2	0	0	0	0	No	10	2	2	2	1	1	0	2	1	0	0
1	1714	Shandong	1	2	1	18	182	90	27.1706	7	1	2	7	2	2	1	2	2	22:30:00	2	06:30:00	5.5	2	2	0	3	3	1	3	1	1	1	0	0	1	0	0	No	12	2	2	2	2	1	0	3	0	0	0
1	1715	Shandong	1	1	2	18	170	50	17.301	1	1	1		1			1	2	22:45	1	06:30:00	6.5	3	1	0	1	1	0	1	0	0	0	0	0	0	1	0	No	6	1	1	1	1	1	0	1	0	0	0
1	1716	Shandong	1	3	2	19	165	70	25.7117	1	1	1		1			2	3	22:40:00	0	07:00:00	6.5	3	1	0	1	0	0	0	1	0	1	0	0	0	0	0	No	5	1	0	1	1	1	0	1	1	0	0
1	1717	Shandong	1	1	2	19	160	80	31.25	1	1	1		1			2	3	23:30:00	2	6:10	5.5	2	2	0	2	2	1	2	0	0	1	0	0	1	0	0	No	10	2	2	2	1	1	0	2	0	0	0
2	1718	Shandong	1	6	2	18	162	70	26.6728	1	1	1		1			2	1	22:50:00	0	06:30:00	8.5	5	1	0	2	1	0	3	0	1	2	2	1	0	1	0	No	5	1	0	0	0	2	0	2	1	0	0
1	1719	Shandong	1	2	2	18	165	60	22.0386	1	1	1		1			3	2	22:00	2	06:00:00	6.5	3	1	0	3	1	3	3	0	0	0	0	1	1	0	0	No	9	1	3	1	1	1	0	2	0	0	0
2	1720	Shandong	1	1	2	19	160	70	27.3438	1	1	1		1			1	1	23:00:00	1	06:30:00	7.5	4	2	0	2	3	2	0	0	0	0	2	0	0	1	2	staying up late to work or study	8	2	2	0	0	1	0	3	0	1	0
2	1721	Shandong	1	1	2	19	162	46	17.5278	1	1	1		1			3	1	23:00:00	0	6:00	7.5	4	0	0	0	0	0	2	0	0	0	0	0	0	0	0	No	1	0	0	0	0	1	0	0	0	0	0
1	1722	Shandong	1	3	2	20	165	52	19.1001	1	1	1		1			4	3	22:45	1	06:45:00	6.5	3	1	0	1	1	1	1	1	0	1	0	0	0	0	0	No	6	1	1	1	1	1	0	1	0	0	0
1	1723	Shandong	1	1	2	19	158	50	20.0288	1	1	1		1			1	3	22:55	0	06:35:00	6.5	3	0	0	1	1	0	0	1	0	0	0	0	1	0	0	No	3	0	0	1	0	1	0	1	1	0	0
1	1724	Shandong	1	6	2	19	172	55	18.5911	1	1	1		1			3	3	23:30:00	0	6:20	5.5	2	2	0	3	2	0	0	0	0	0	0	0	0	0	0	No	8	2	0	2	1	0	0	3	0	0	1
1	1725	Shandong	1	1	1	19	190	85	23.5457	1	1	1		1			2	1	21:50	0	06:40:00	6.5	3	1	0	0	1	0	0	2	0	0	0	0	1	0	0	No	6	1	0	1	2	1	0	1	0	0	0
1	1726	Shandong	1	3	2	19	155	55	22.8928	1	1	1		1			1	3	23:00:00	1	07:00:00	6.5	3	2	0	0	1	0	0	0	0	0	0	0	0	0	0	No	6	2	1	1	1	0	0	1	0	1	0
2	1727	Shandong	1	1	2	19	159	48	18.9866	1	1	1		1			2	2	22:45	0	06:30:00	7.5	4	0	0	0	0	0	0	0	0	2	0	0	0	0	0	No	1	0	0	0	0	1	0	0	1	0	0
2	1728	Shandong	1	1	2	20	166	52	18.8707	1	1	1		1			1	1	22:50:00	0	6:25	7.5	4	1	0	2	1	0	0	1	0	0	1	1	1	0	0	No	4	1	0	0	0	1	0	2	1	0	0
2	1729	Shandong	1	1	1	19	190	84	23.2687	1	1	1		1			3	3	23:30:00	0	6:00	7.5	4	1	0	2	0	0	0	0	0	0	0	0	1	0	0	No	3	1	0	0	0	1	0	1	1	0	0
1	1730	Shandong	1	1	2	18	170	60	20.7612	1	1	1		1			2	1	23:00:00	1	06:30:00	6.5	3	1	0	0	3	0	0	1	0	0	0	0	0	0	0	No	6	1	1	1	0	1	0	2	1	0	0
1	1731	Shandong	1	2	2	18	165	72	26.4463	1	1	1		1			3	1	23:00:00	0	6:15	6.5	3	0	0	1	1	0	1	0	1	1	0	0	1	0	0	No	3	0	0	1	0	1	0	1	1	0	0
2	1732	Shandong	1	1	2	18	178	58	18.3058	1	1	1		1			2	3	22:30:00	0	06:35:00	7.5	4	1	0	1	0	0	0	0	0	0	0	1	0	0	0	No	3	1	0	0	0	1	0	1	1	0	0
1	1733	Shandong	1	1	2	19	166	62	22.4996	1	1	1		1			3	1	23:30:00	2	6:15	5.5	2	1	0	2	1	1	1	1	0	0	0	0	0	0	0	No	9	1	2	2	1	1	0	2	1	0	1
1	1734	Shandong	1	2	2	19	168	55	19.487	1	1	1		1			4	3	23:00:00	2	6:10	5.5	2	2	0	3	2	2	1	0	0	0	0	2	0	3	0	No	11	2	2	2	1	1	0	3	0	0	0
1	1735	Shandong	1	1	2	19	163	50	18.8189	1	1	1		1			1	3	23:00:00	3	06:45:00	6.5	3	1	0	2	1	2	2	0	0	0	0	0	0	0	0	No	9	1	3	1	1	1	0	2	1	0	0
1	1736	Shandong	1	1	2	18	153	50	21.3593	1	1	1		1			2	1	23:15:00	0	06:30:00	6.5	3	1	0	3	3	0	2	0	2	0	2	0	2	0	0	No	6	1	0	1	0	1	0	3	1	0	1
1	1737	Shandong	1	1	1	19	175	69	22.5306	1	1	1		1			3	3	22:45	2	6:20	6.5	3	1	0	0	0	0	1	0	0	0	0	0	0	0	0	No	4	1	1	1	0	1	0	0	0	0	1
2	1738	Shandong	1	1	2	21	165	75	27.5482	1	1	1		1			1	3	22:30:00	0	6:20	7.5	4	1	0	1	1	0	0	0	0	0	0	0	0	0	0	No	2	1	0	0	0	0	0	1	1	1	0
2	1739	Shandong	1	1	2	19	165	65	23.8751	1	1	1		1			3	3	22:30:00	0	06:30:00	7.5	4	1	0	3	3	2	1	0	0	0	0	0	0	1	0	No	6	1	1	0	0	1	0	3	1	1	0
2	1740	Shandong	1	1	1	18	188	65	18.3907	1	1	1		1			1	2	22:00	1	6:50	7.5	4	1	0	1	1	2	2	0	0	0	2	2	1	1	0	No	5	1	2	0	0	1	0	1	1	0	0
1	1741	Shandong	1	1	1	19	176	90	29.0548	1	1	1		1			1	1	00:00:00	0	06:40:00	6.5	3	1	0	3	1	1	1	0	0	1	0	0	1	0	0	No	6	1	1	1	0	1	0	2	1	0	0
1	1742	Shandong	1	1	2	18	173	70	23.3887	1	1	1		1			3	1	22:30:00	2	06:40:00	5.5	2	2	0	2	3	2	2	0	0	0	3	0	1	0	0	No	12	2	2	2	2	1	0	3	1	0	0
1	1743	Shandong	1	3	2	20	164	98	36.4366	1	1	1		1			2	3	22:40:00	1	06:40:00	5.5	2	3	0	3	2	2	0	0	0	0	0	0	3	0	0	No	13	3	2	2	2	1	0	3	1	1	0
1	1744	Liaoning	1	1	2	18	162	52	19.8141	1	1	1		1			1	3	22:30:00	1	6:10	6.5	3	2	0	3	3	1	2	0	3	3	1	1	0	2	2	Sickness	9	2	1	1	0	2	0	3	0	0	0
1	1745	Shandong	1	1	2	19	160	52	20.3125	1	1	1		1			1	3	22:30:00	1	6:20	6.5	3	2	0	3	2	1	0	1	1	1	2	1	0	1	0	No	9	2	1	1	1	1	0	3	0	0	0
2	1746	Shandong	1	1	2	18	155	64	26.6389	1	1	1		1			4	1	22:40:00	1	06:40:00	7.5	4	0	0	2	1	0	0	0	0	0	0	0	0	0	0	No	3	0	1	0	0	0	0	2	1	0	0
1	1747	Shandong	1	1	2	19	168	55	19.487	1	1	1		1			2	1	23:30:00	3	6:50	6.5	3	1	0	0	1	0	0	0	0	0	2	1	0	0	0	No	6	1	2	1	0	1	0	1	1	1	0
1	1748	Shandong	1	3	2	19	164	50	18.5901	1	1	1		1			2	1	23:00:00	1	06:40:00	5.5	2	1	0	1	1	1	1	1	1	0	1	1	1	1	1	No	8	1	1	2	2	1	0	1	0	0	1
2	1749	Shandong	1	1	2	20	164	53	19.7055	1	1	1		1			3	1	22:30:00	0	06:30:00	7.5	4	1	0	0	1	0	0	0	0	0	0	0	0	0	0	No	2	1	0	0	0	0	0	1	1	0	0
1	1750	Shandong	1	1	1	18	170	73.5	25.4325	1	1	1		2	2	1	3	3	23:00:00	1	06:30:00	5.5	2	2	0	3	3	3	2	3	1	0	2	1	0	0	0	No	12	2	2	2	2	1	0	3	1	0	0
1	1751	Shandong	1	1	2	20	172	75	25.3515	1	1	1		1			2	3	22:40:00	2	6:20	6.5	3	1	0	3	3	2	2	3	2	0	3	1	1	1	0	No	9	1	2	1	0	2	0	3	1	0	0
2	1752	Shandong	1	1	2	20	155	44	18.3143	1	1	1		1			2	1	22:00	0	6:50	7.5	4	1	0	1	1	0	0	0	0	0	0	0	0	0	0	No	2	1	0	0	0	0	0	1	1	0	0
1	1753	Shandong	1	1	2	17	168	65	23.03	1	1	1		1			1	3	23:00:00	1	6:20	6.5	3	0	0	0	0	0	0	0	0	1	0	0	0	0	0	No	3	0	1	1	0	1	0	0	1	0	1
1	1754	Shandong	1	6	2	18	170	67.5	23.3564	1	1	1		1			2	2	22:30:00	0	06:40:00	6.5	3	1	0	3	2	1	3	2	2	0	0	3	0	0	0	No	9	1	1	1	1	2	0	3	1	0	1
2	1755	Shandong	1	1	2	18	167	57	20.4382	1	1	1		1			2	2	22:00	0	06:30:00	7.5	4	1	0	2	1	1	2	0	0	0	1	0	1	1	0	No	5	1	1	0	0	1	0	2	0	0	0
1	1756	Shandong	1	1	1	18	175	85	27.7551	1	1	1		1			2	1	23:30:00	1	07:00:00	6.5	3	1	0	1	1	1	1	1	0	0	1	1	0	0	0	No	5	1	1	1	0	1	0	1	1	1	0
2	1757	Shandong	1	1	2	20	160	43.5	16.9922	1	1	1		1			2	3	22:30:00	0	6:20	7.5	4	1	0	0	1	1	3	1	0	0	0	2	1	0	0	No	4	1	1	0	0	1	0	1	1	0	0
1	1758	Shandong	1	1	1	19	183	88	26.2773	1	1	1		1			2	3	00:00:00	0	07:00:00	5.5	2	1	0	1	1	0	1	1	0	0	0	0	1	0	0	No	6	1	0	2	1	1	0	1	1	0	0
1	1759	Shandong	1	1	2	19	163	49	18.4425	1	1	1		1			3	1	22:50:00	1	06:30:00	5.5	2	1	0	3	2	2	0	1	0	0	1	0	0	0	1	staying up late to work or study	11	1	2	2	2	1	0	3	1	1	0
2	1760	Shandong	1	3	2	19	170	56	19.3772	1	1	1		1			2	1	22:45	0	6:20	7.5	4	0	0	0	1	1	0	0	0	0	0	0	0	0	0	No	2	0	1	0	0	0	0	1	1	0	0
1	1761	Shandong	1	1	1	19	170	71	24.5675	1	1	1		1			3	3	23:00:00	1	5:30	5.5	2	2	0	3	2	2	2	2	1	3	1	1	2	2	0	No	11	2	2	2	0	2	0	3	0	0	1
2	1762	Shandong	1	1	2	19	176	72	23.2438	1	1	1		1			2	1	22:30:00	0	06:45:00	7.5	4	1	0	0	1	0	0	0	0	0	0	0	0	0	0	No	2	1	0	0	0	0	0	1	0	0	0
2	1763	Shandong	1	6	2	18	178	60	18.937	1	1	1		1			1	3	22:10:00	0	6:20	8.5	5	0	0	0	0	0	0	0	0	0	0	0	0	0	0	No	0	0	0	0	0	0	0	0	0	0	1
1	1764	Shandong	1	1	1	18	178	86	27.143	1	1	1		2	1	2	2	1	21:50	3	6:50	6.5	3	2	0	3	2	2	0	0	0	3	3	2	2	0	0	No	13	2	3	1	2	2	0	3	1	1	0
1	1765	Shandong	1	1	2	19	163	60	22.5827	1	1	1		1			2	1	22:00	1	06:30:00	5.5	2	1	0	3	0	0	3	0	0	0	2	0	0	2	0	No	9	1	1	2	2	1	0	2	0	1	0
1	1766	Shandong	1	1	1	18	175	53	17.3061	1	1	1		2	1	2	1	3	23:00:00	0	6:00	5.5	2	2	0	2	1	0	0	0	0	1	0	0	0	0	0	No	8	2	0	2	1	1	0	2	1	1	1
1	1767	Shandong	1	1	2	17	171	64	21.8871	1	1	1		1			3	3	22:20:00	0	6:20	6.5	3	1	0	0	0	0	2	0	0	0	0	0	0	0	0	No	4	1	0	1	1	1	0	0	0	0	0
1	1768	Shandong	1	4	1	18	175	70	22.8571	1	1	1		1			2	1	22:50:00	0	06:35:00	6.5	3	1	0	0	0	0	0	0	0	0	0	0	0	0	0	No	3	1	0	1	1	0	0	0	0	1	0
2	1769	Shandong	1	1	1	18	175	60	19.5918	1	1	1		1			1	3	23:00:00	0	06:45:00	7.5	4	0	0	3	3	2	2	1	0	0	0	0	0	0	0	No	5	0	1	0	0	1	0	3	1	0	0
1	1770	Shandong	1	1	2	19	170	62	21.4533	1	1	1		1			1	3	22:20:00	1	06:38:00	6.5	3	1	0	0	0	0	0	0	0	0	0	0	0	0	0	No	4	1	1	1	1	0	0	0	1	0	1
2	1771	Shandong	1	4	1	18	177	87	27.7698	1	1	1		1			1	3	22:30:00	1	06:30:00	7.5	4	0	0	0	0	0	0	0	0	1	0	0	0	0	0	No	2	0	1	0	0	1	0	0	0	0	0
1	1772	Shandong	1	1	2	18	160	52	20.3125	1	1	1		1			1	3	22:40:00	1	6:20	6.5	3	1	0	1	1	1	0	0	0	0	1	0	1	0	0	No	5	1	1	1	0	1	0	1	0	0	1
1	1773	Shandong	1	2	2	19	167	55	19.721	1	1	1		1			1	1	23:00:00	1	06:30:00	6.5	3	1	0	0	0	0	2	1	0	0	0	0	0	1	0	No	4	1	1	1	0	1	0	0	0	0	0
1	1774	Shandong	1	1	2	19	168	70	24.8016	1	1	1		1			1	3	22:51:00	0	6:10	6.5	3	1	0	1	1	0	2	0	0	0	1	0	0	0	0	No	4	1	0	1	0	1	0	1	0	0	0
2	1775	Shandong	1	1	1	18	179	75	23.4075	1	1	1		1			2	3	23:30:00	0	06:30:00	7.5	4	1	0	3	1	0	1	2	0	3	2	0	1	0	0	No	4	1	0	0	0	1	0	2	0	1	1
1	1776	Xinjiang	1	6	2	19	165	60	22.0386	1	1	1		1			2	1	23:30:00	0	06:30:00	6.5	3	1	0	2	2	0	2	1	0	2	0	0	0	0	0	No	5	1	0	1	0	1	0	2	1	0	0
1	1777	Shandong	1	1	1	18	178	61	19.2526	1	1	1		1			1	2	23:30:00	0	6:20	5.5	2	1	0	3	3	1	1	0	0	0	0	0	0	0	3	the dormitory environment affects sleep	9	1	1	2	1	1	0	3	1	1	0
1	1778	Shandong	1	4	1	18	168	74	26.2188	1	1	1		1			2	1	23:20:00	0	6:20	6.5	3	2	0	3	3	0	2	0	0	1	3	0	1	2	2	repeated thoughts in bed	8	2	0	1	0	2	0	3	1	1	0
2	1779	Shandong	1	1	1	18	180	75	23.1481	1	1	1		1			2	1	22:50:00	0	06:40:00	7.5	4	1	0	2	0	0	1	0	0	3	2	0	0	0	0	No	3	1	0	0	0	1	0	1	1	0	1
1	1780	Shandong	1	4	2	17	171	60	20.5191	1	1	1		1			2	3	22:20:00	0	6:10	6.5	3	1	0	3	1	0	1	0	0	0	0	0	0	0	0	No	6	1	0	1	1	1	0	2	1	0	0
2	1781	Shandong	1	1	2	19	168	57	20.1956	1	1	1		1			2	1	00:00:00	3	06:45:00	7.5	4	2	0	3	1	3	0	0	0	0	0	0	0	0	2	repeated thoughts in bed	8	2	3	0	0	1	0	2	0	0	0
1	1782	Shandong	1	1	2	18	165	66	24.2424	1	1	1		1			1	2	23:00:00	0	6:20	6.5	3	1	0	2	1	0	0	1	0	0	0	0	0	0	0	No	5	1	0	1	0	1	0	2	1	0	1
1	1783	Shandong	1	1	2	18	165	52	19.1001	1	1	1		1			2	1	23:00:00	0	06:30:00	6.5	3	0	0	2	0	0	0	1	0	0	0	0	0	0	0	No	3	0	0	1	0	1	0	1	1	0	0
2	1784	Shandong	1	6	2	20	161	60	23.1473	1	1	1		1			2	3	22:00	1	05:20:00	7.5	4	1	0	3	2	1	3	0	1	3	3	0	0	0	3	mood problems	7	1	1	0	0	2	0	3	0	0	1
2	1785	Beijing	2	1	2	19	170	62	21.4533	1	1	1		1			3	1	22:40:00	0	06:30:00	8.5	5	0	0	0	0	0	0	0	0	0	0	0	0	0	0	No	0	0	0	0	0	0	0	0	1	0	0
1	1786	Shandong	1	4	2	18	160	48	18.75	1	1	1		1			3	3	23:30:00	0	6:15	5.5	2	1	0	0	0	0	0	0	0	0	0	0	0	0	0	No	4	1	0	2	1	0	0	0	1	0	1
1	1787	Shandong	1	1	2	18	155	48	19.9792	1	1	1		1			2	3	23:00:00	0	06:30:00	6.5	3	1	0	1	1	0	0	0	0	0	0	0	0	0	0	No	3	1	0	1	0	0	0	1	1	0	0
1	1788	Shandong	1	1	2	19	165	60	22.0386	1	1	1		1			2	1	23:30:00	0	06:40:00	5.5	2	1	0	2	1	0	2	0	0	0	1	1	2	1	0	No	7	1	0	2	1	1	0	2	1	0	0
2	1789	Shandong	1	1	2	19	166	87	31.5721	1	1	1		1			3	3	23:00:00	0	6:10	7.5	4	1	0	2	2	0	0	0	1	0	0	0	0	0	0	No	4	1	0	0	0	1	0	2	1	0	0
1	1790	Shandong	1	1	2	18	162	70	26.6728	4	1	1		1			2	1	23:00:00	2	06:30:00	6.5	3	1	0	1	1	0	0	0	0	2	3	0	0	0	0	No	5	1	1	1	0	1	0	1	0	0	0
2	1791	Shandong	1	1	1	19	175	57	18.6122	1	1	1		1			3	2	22:00	0	06:00:00	7.5	4	0	0	0	0	0	0	0	0	0	0	0	0	0	0	No	0	0	0	0	0	0	0	0	0	0	0
1	1792	Shandong	1	4	1	18	183	80	23.8884	1	1	1		2	1	1	2	3	23:30:00	0	06:30:00	6.5	3	1	0	0	1	1	0	0	0	0	0	0	0	1	0	No	5	1	1	1	0	1	0	1	1	0	0
1	1793	Shandong	1	1	2	19	162	75	28.578	1	1	1		1			2	3	23:00:00	2	06:30:00	5.5	2	1	0	1	1	1	1	0	0	0	0	0	0	0	0	No	9	1	2	2	2	1	0	1	1	0	0
2	1794	Shandong	1	1	1	18	180	88	27.1605	1	1	1		1			2	3	22:30:00	1	06:30:00	7.5	4	2	0	2	1	2	1	1	1	2	1	1	3	1	0	No	8	2	2	0	0	2	0	2	1	0	0
2	1795	Shandong	1	1	1	18	178	76	23.9869	1	1	1		1			2	3	22:00	1	06:38:00	7.5	4	0	0	1	1	1	2	1	0	0	3	0	0	0	0	No	3	0	1	0	0	1	0	1	1	0	0
2	1796	Shandong	1	4	2	19	158	53	21.2306	1	1	1		1			2	2	23:20:00	0	06:30:00	7.5	4	1	0	3	1	1	0	0	0	0	2	0	0	0	0	No	5	1	1	0	0	1	0	2	1	0	0
1	1797	Shandong	1	1	2	18	165	50	18.3655	1	1	1		1			2	3	23:30:00	1	6:20	5.5	2	2	0	2	2	1	2	0	0	0	0	3	0	0	0	No	9	2	1	2	1	1	0	2	0	0	1
1	1798	Shandong	1	1	2	19	164	55	20.4491	1	1	1		1			3	1	22:30:00	1	6:20	6.5	3	1	0	3	2	2	1	1	0	0	2	0	0	0	0	No	9	1	2	1	1	1	0	3	0	0	1
1	1799	Shandong	1	1	2	18	168	53	18.7783	1	1	1		1			3	3	23:00:00	1	06:30:00	6.5	3	2	0	2	1	0	1	2	0	1	1	0	1	0	0	No	7	2	1	1	0	1	0	2	1	0	0
2	1800	Shandong	1	1	2	19	162	57	21.7193	1	1	1		1			2	1	22:30:00	0	6:20	7.5	4	0	0	0	1	0	0	1	0	0	0	0	0	1	1	No	2	0	0	0	0	1	0	1	0	0	0
2	1801	Shandong	1	1	2	20	155	60	24.974	1	1	1		1			3	3	22:30:00	1	06:30:00	7.5	4	3	0	3	3	1	2	2	0	0	0	0	0	0	1	No	8	3	1	0	0	1	0	3	1	0	1
1	1802	Shandong	1	1	2	19	172	70	23.6614	1	1	1		1			1	2	22:00	1	06:30:00	6.5	3	3	0	3	1	0	2	0	0	1	0	0	0	0	0	No	9	3	1	1	1	1	0	2	0	0	0
1	1803	Xinjiang	1	1	2	18	161	65	25.0762	1	1	1		1			1	1	22:30:00	0	06:45:00	5.5	2	1	0	1	1	1	1	0	0	0	0	0	0	0	0	No	8	1	1	2	2	1	0	1	1	0	0
1	1804	Shandong	1	1	2	18	158	55	22.0317	1	1	1		2	2	1	1	1	23:30:00	0	06:30:00	6.5	3	1	0	0	1	0	3	1	0	0	0	0	0	0	0	No	4	1	0	1	0	1	0	1	1	1	0
2	1805	Shandong	1	1	2	18	160	47	18.3594	1	1	1		1			1	3	23:00:00	0	06:30:00	7.5	4	0	0	0	0	0	0	0	0	0	0	0	0	0	0	No	0	0	0	0	0	0	0	0	1	0	0
1	1806	Shandong	1	4	2	19	160	57	22.2656	1	1	1		1			3	1	23:00:00	1	6:20	6.5	3	1	0	3	1	1	1	1	0	0	0	0	0	0	2	the dormitory environment affects sleep	6	1	1	1	0	1	0	2	1	0	0
1	1807	Shandong	1	1	2	19	165	51	18.7328	1	1	1		1			4	1	22:00	0	06:30:00	6.5	3	0	0	0	0	0	0	0	0	0	0	0	0	0	0	No	2	0	0	1	1	0	0	0	0	0	0
2	1808	Shandong	1	1	2	18	167	58	20.7967	1	1	1		1			2	3	22:00	2	06:30:00	7.5	4	0	0	3	1	0	0	0	0	0	0	0	0	0	0	No	3	0	1	0	0	0	0	2	0	0	0
2	1809	Shandong	1	4	2	19	150	55	24.4444	1	1	1		1			3	3	23:00:00	0	06:30:00	7.5	4	1	0	0	0	0	0	0	0	0	0	0	0	0	0	No	1	1	0	0	0	0	0	0	1	0	0
1	1810	Shandong	1	1	2	18	160	60	23.4375	1	1	1		1			2	1	23:00:00	1	6:20	6.5	3	1	0	2	1	2	0	0	0	0	0	0	1	0	0	No	7	1	2	1	0	1	0	2	0	1	0
1	1811	Shandong	1	1	1	18	186	75	21.6788	1	1	1		1			2	2	23:00:00	1	6:00	5.5	2	0	0	0	0	0	0	0	0	0	0	0	0	0	0	No	4	0	1	2	1	0	0	0	0	1	1
1	1812	Shandong	1	1	2	19	165	85	31.2213	1	1	1		1			2	3	23:00:00	3	06:30:00	6.5	3	1	0	2	1	0	0	0	0	0	0	0	0	0	0	No	6	1	2	1	0	0	0	2	1	0	1
2	1813	Shandong	1	1	1	19	173	60	20.0474	1	1	1		1			3	3	22:30:00	0	06:30:00	8.5	5	0	0	0	0	0	0	0	0	0	0	0	0	0	0	No	0	0	0	0	0	0	0	0	0	0	0
1	1814	Shandong	1	1	2	18	160	98	38.2812	1	1	1		1			3	3	00:00:00	3	06:35:00	5.5	2	2	0	3	2	3	0	1	0	0	0	1	1	0	0	No	12	2	3	2	1	1	0	3	1	1	0
1	1815	Shandong	1	1	2	18	162	80	30.4832	1	1	1		1			4	3	23:00:00	1	06:30:00	6.5	3	1	0	0	0	1	1	1	0	0	0	0	0	0	0	No	4	1	1	1	0	1	0	0	1	0	0
2	1816	Shandong	1	1	2	19	165	72	26.4463	1	1	1		1			1	3	22:30:00	0	06:20:00	7.5	4	0	0	1	0	0	0	0	0	0	0	0	0	0	0	No	1	0	0	0	0	0	0	1	1	0	0
1	1817	Shandong	1	1	2	18	168	57	20.1956	1	1	1		1			1	1	23:12	0	6:44	6.5	3	0	0	0	2	0	0	0	0	0	0	0	0	0	0	No	2	0	0	1	0	0	0	1	1	0	0
1	1818	Shandong	1	1	2	19	164	58	21.5645	1	1	1		1			1	3	23:00:00	0	06:30:00	6.5	3	1	0	2	1	0	0	2	1	0	1	0	0	2	0	No	5	1	0	1	0	1	0	2	0	1	0
1	1819	Shandong	1	1	2	18	166	50	18.1449	1	1	1		1			3	3	23:30:00	1	06:40:00	6.5	3	1	0	1	1	1	1	0	0	0	0	2	0	0	0	No	5	1	1	1	0	1	0	1	1	0	0
1	1820	Guizhou	1	1	2	18	162	60	22.8624	1	1	1		1			2	1	23:00:00	0	6:00	5.5	2	1	0	3	1	1	1	0	1	1	0	0	0	0	0	No	8	1	1	2	1	1	0	2	0	0	0
2	1821	Shandong	1	1	2	19	155	57	23.7253	1	1	1		1			1	2	23:00:00	0	06:40:00	7.5	4	0	0	0	1	1	0	0	0	0	0	0	0	0	0	No	2	0	1	0	0	0	0	1	1	1	0
1	1822	Shandong	1	4	2	19	166	61	22.1367	1	1	1		1			2	1	23:05	0	06:30:00	6.5	3	1	0	2	1	0	1	0	0	1	1	0	0	1	0	No	5	1	0	1	0	1	0	2	1	0	0
1	1823	Shandong	1	1	2	19	166	63	22.8625	1	1	1		2	1	1	1	3	23:00:00	1	6:20	5.5	2	2	0	2	1	2	1	1	0	0	2	0	0	0	2	the dormitory environment affects sleep	10	2	2	2	1	1	0	2	0	0	0
1	1824	Shandong	1	1	2	19	163	53	19.9481	1	1	1		1			2	3	22:30:00	1	06:30:00	6.5	3	1	0	2	1	2	0	2	0	0	1	0	0	0	0	No	8	1	2	1	1	1	0	2	0	0	0
1	1825	Shandong	1	1	2	19	168	54	19.1327	1	1	1		1			3	3	23:00:00	0	07:00:00	6.5	3	1	0	0	1	0	0	0	0	0	0	0	0	0	0	No	4	1	0	1	1	0	0	1	1	0	0
2	1826	Shandong	1	1	2	19	163	60	22.5827	1	1	1		1			2	3	22:30:00	1	06:35:00	7.5	4	1	0	2	0	1	0	0	0	1	1	1	0	0	0	No	4	1	1	0	0	1	0	1	1	0	0
1	1827	Shandong	1	1	2	18	167	55	19.721	1	1	1		1			2	3	22:00	0	06:30:00	6.5	3	1	0	2	1	1	1	0	0	0	0	0	1	0	0	No	7	1	1	1	1	1	0	2	0	0	0
2	1828	Shandong	1	1	1	20	184	75	22.1526	1	1	2	40	2	2	1	3	2	00:00:00	0	6:00	7.5	4	2	0	3	0	0	0	0	0	2	2	0	0	0	0	No	5	2	0	0	0	1	0	2	1	1	0
1	1829	Shandong	1	1	2	18	163	92	34.6268	1	1	1		1			3	3	22:12	1	6:15	6.5	3	1	0	3	1	1	1	0	0	0	1	0	0	0	0	No	7	1	1	1	1	1	0	2	1	0	0
1	1830	Shanxi	1	1	2	19	150	48	21.3333	1	1	1		1			2	1	22:00	3	6:15	6.5	3	1	0	2	2	1	1	0	0	0	0	0	0	0	0	No	8	1	2	1	1	1	0	2	1	1	0
1	1831	Shandong	1	1	2	19	162	52	19.8141	1	1	1		1			2	1	22:30:00	1	06:40:00	5.5	2	1	0	2	0	2	0	0	0	0	0	0	0	0	0	No	8	1	2	2	2	0	0	1	0	1	0
2	1832	Shandong	1	1	2	19	165	50	18.3655	1	1	1		1			3	3	22:40:00	0	5:30	7.5	4	0	0	1	1	0	1	0	0	0	0	0	0	0	0	No	2	0	0	0	0	1	0	1	0	0	0
1	1833	Shandong	1	1	1	19	179	62.5	19.5063	1	1	1		1			1	3	22:30:00	2	06:40:00	6.5	3	1	0	0	0	2	0	0	0	0	0	0	0	0	0	No	5	1	2	1	1	0	0	0	1	0	0
1	1834	Shandong	1	1	2	19	175	52.5	17.1429	1	1	1		1			3	3	23:00:00	0	6:20	6.5	3	1	0	3	3	1	3	2	0	0	0	0	0	0	1	No	7	1	1	1	0	1	0	3	1	0	0
1	1835	Shandong	1	1	2	18	166	57.5	20.8666	1	1	1		1			2	3	22:35	1	06:30:00	6.5	3	0	0	1	0	0	0	0	0	0	0	1	0	0	0	No	5	0	1	1	1	1	0	1	0	0	1
1	1836	Shandong	1	1	2	19	164	63	23.4236	1	1	1		1			1	3	21:55:00	2	06:45:00	6.5	3	1	0	1	0	2	0	0	0	0	1	0	0	0	0	No	8	1	2	1	2	1	0	1	0	1	0
1	1837	Shandong	1	1	1	18	180	80	24.6914	1	1	1		1			2	3	22:30:00	0	6:00	5.5	2	1	0	2	1	2	2	1	0	0	0	0	0	0	0	No	9	1	1	2	2	1	0	2	0	0	1
2	1838	Shandong	1	1	2	19	160	98	38.2812	1	1	1		1			2	1	22:30:00	1	06:40:00	7.5	4	2	1	2	1	2	0	0	0	0	1	0	2	1	1	staying up late to work or study	8	2	2	0	0	1	1	2	0	0	0
1	1839	Shandong	1	1	2	19	164	63	23.4236	1	1	1		1			2	3	22:30:00	1	6:20	4.5	1	2	0	2	1	1	1	0	0	1	1	0	1	3	0	No	12	2	1	3	3	1	0	2	0	0	0
2	1840	Shandong	1	2	1	20	176	75	24.2123	1	1	1		1			2	1	22:30:00	0	06:30:00	7.5	4	0	0	0	0	0	0	0	0	0	0	0	0	0	0	No	0	0	0	0	0	0	0	0	1	0	0
2	1841	Shandong	1	2	2	19	160	54	21.0938	1	1	1		1			2	3	22:30:00	0	6:20	7.5	4	1	0	1	1	0	0	1	0	0	0	0	1	1	1	staying up late to work or study	3	1	0	0	0	1	0	1	1	0	1
1	1842	Shandong	1	1	2	19	170	83	28.7197	1	1	1		1			2	1	22:40:00	0	06:20:00	6.5	3	2	0	0	0	0	0	0	0	0	0	0	0	0	0	No	3	2	0	1	0	0	0	0	0	0	0
1	1843	Shandong	1	2	2	18	158	52	20.83	1	1	1		1			3	3	22:30:00	1	6:00	6.5	3	1	0	0	0	0	0	0	0	0	0	0	0	0	0	No	3	1	1	1	0	0	0	0	0	1	1
1	1844	Shandong	1	1	2	19	167	48	17.2111	1	1	1		1			1	3	22:30:00	0	6:10	6.5	3	1	0	1	1	0	1	1	0	0	1	1	1	1	0	No	4	1	0	1	0	1	0	1	0	1	0
1	1845	Shandong	1	2	1	19	184	84	24.811	1	1	1		2	1	1	2	3	23:30:00	0	06:30:00	6.5	3	2	0	3	1	0	3	0	0	0	0	0	0	0	0	No	6	2	0	1	0	1	0	2	0	1	0
2	1846	Shandong	1	1	1	18	181	98	29.9136	1	1	1		1			1	3	22:35	0	6:15	7.5	4	0	0	0	1	2	2	3	0	0	2	0	0	0	0	No	3	0	1	0	0	1	0	1	1	0	0
1	1847	Shandong	1	2	1	20	182	60	18.1138	1	1	1		2	2	2	3	1	23:00:00	1	06:30:00	5.5	2	1	0	3	1	0	0	0	0	0	1	0	0	0	0	No	9	1	1	2	2	1	0	2	1	1	0
1	1848	Shandong	1	2	1	19	178	65	20.5151	1	1	1		1			1	1	22:30:00	2	06:40:00	6.5	3	0	0	1	1	1	0	0	0	0	0	0	0	0	0	No	5	0	2	1	1	0	0	1	1	0	0
2	1849	Shandong	1	2	2	19	164	55	20.4491	1	1	1		2	2	1	2	3	22:00	2	6:10	7.5	4	1	0	2	2	3	0	0	0	0	0	0	2	0	0	No	7	1	3	0	0	1	0	2	0	0	0
1	1850	Shandong	1	2	2	19	175	80	26.1224	1	1	1		1			3	2	22:30:00	3	6:00	5.5	2	3	0	3	2	3	3	0	0	0	0	0	3	3	0	No	14	3	3	2	2	1	0	3	0	1	0
2	1851	Shandong	1	2	1	19	177	56	17.8748	1	1	1		1			1	3	23:00:00	0	06:30:00	7.5	4	1	0	2	2	0	0	0	0	0	0	0	0	0	0	No	3	1	0	0	0	0	0	2	1	0	1
2	1852	Shandong	1	2	2	19	160	43	16.7969	1	1	1		1			2	1	22:00	1	6:00	7.5	4	0	0	0	0	0	0	0	0	0	0	0	0	0	0	No	1	0	1	0	0	0	0	0	0	0	0
1	1853	Shandong	1	2	2	18	155	75	31.2175	1	1	1		1			3	1	23:00:00	0	06:40:00	4.5	1	2	0	3	0	0	2	0	0	2	1	3	0	0	0	No	11	2	0	3	3	1	0	2	1	1	1
1	1854	Shandong	1	2	1	19	170	52	17.9931	1	1	1		1			2	1	23:00:00	2	6:00	6.5	3	2	0	1	1	1	0	1	0	0	1	0	0	0	0	No	7	2	2	1	0	1	0	1	0	1	0
1	1855	Shandong	1	2	2	18	169	50	17.5064	1	1	1		1			2	1	22:30:00	0	6:00	6.5	3	0	0	0	0	0	0	0	0	0	0	0	0	0	0	No	1	0	0	1	0	0	0	0	0	0	1
1	1856	Shandong	1	2	2	19	162	50	19.052	1	1	1		1			2	1	23:00:00	0	06:30:00	5.5	2	1	0	0	0	0	0	0	0	1	0	0	0	0	0	No	6	1	0	2	2	1	0	0	1	0	0
1	1857	Shandong	1	1	2	18	163	52	19.5717	1	1	1		1			3	3	23:00:00	2	06:35:00	6.5	3	2	0	3	2	3	2	2	0	0	2	2	2	0	0	No	11	2	3	1	0	2	0	3	0	0	0
1	1858	Shandong	1	2	2	19	164	55	20.4491	1	1	1		1			2	3	23:40	1	06:30:00	5.5	2	2	0	2	1	1	0	0	0	0	2	0	1	1	2	the dormitory environment affects sleep	9	2	1	2	1	1	0	2	1	0	0
1	1859	Shandong	1	2	1	18	170	50	17.301	1	1	1		1			1	3	23:00:00	0	06:30:00	6.5	3	1	0	0	0	0	0	2	0	0	0	0	0	0	0	No	3	1	0	1	0	1	0	0	0	1	1
1	1860	Shandong	1	1	2	20	166	50	18.1449	1	1	1		1			2	3	22:30:00	0	6:20	6.5	3	0	0	0	0	0	0	0	0	0	0	0	0	0	0	No	2	0	0	1	1	0	0	0	0	0	0
1	1861	Shandong	1	2	1	19	183	92	27.4717	1	1	2	10	2	2	1	3	1	23:00:00	0	6:00	6.5	3	0	0	0	1	0	0	0	0	3	1	1	0	0	0	No	3	0	0	1	0	1	0	1	1	0	0
2	1862	Shandong	1	2	2	19	163	62	23.3355	1	1	1		1			3	1	22:30:00	2	6:20	7.5	4	2	0	3	3	3	3	2	0	0	0	0	0	0	0	No	9	2	3	0	0	1	0	3	0	0	0
1	1863	Shandong	1	1	2	18	162	62	23.6244	1	1	1		1			3	1	22:30:00	0	6:00	6.5	3	1	0	3	1	0	0	1	0	0	0	0	0	0	0	No	5	1	0	1	0	1	0	2	0	0	1
1	1864	Shandong	1	2	1	18	187	72	20.5897	1	1	1		2	2	3	1	1	22:40:00	0	06:30:00	6.5	3	1	0	1	0	1	0	1	0	1	0	0	0	0	0	No	6	1	1	1	1	1	0	1	1	0	0
1	1865	Shandong	1	2	2	17	162	61	23.2434	1	1	1		1			3	1	23:30:00	1	6:20	6.5	3	1	0	1	0	1	0	2	0	0	0	0	0	0	1	the dormitory environment affects sleep	5	1	1	1	0	1	0	1	0	0	0
1	1866	Shandong	1	1	2	19	160	55	21.4844	1	1	1		1			2	1	23:30:00	0	06:40:00	5.5	2	1	0	1	1	0	0	0	0	0	0	0	0	0	0	No	5	1	0	2	1	0	0	1	1	1	1
1	1867	Shandong	1	2	2	20	163.5	60	22.4448	1	1	1		1			2	3	23:00:00	3	6:50	6.5	3	1	0	1	1	1	3	0	0	2	0	0	0	0	3	the dormitory environment affects sleep	7	1	2	1	1	1	0	1	0	0	1
1	1868	Shandong	1	2	2	19	155	48	19.9792	1	1	1		1			3	1	22:50:00	0	6:15	6.5	3	1	0	1	1	0	0	0	0	1	0	0	0	0	0	No	4	1	0	1	0	1	0	1	1	0	0
1	1869	Shandong	1	2	2	19	162	54	20.5761	1	1	1		1			2	3	23:00:00	0	06:30:00	6.5	3	2	0	2	1	0	0	0	0	0	0	0	0	0	0	No	5	2	0	1	0	0	0	2	0	0	1
1	1870	Shandong	1	2	1	18	168	83	29.4076	1	1	1		1			3	3	23:20:00	0	6:50	5.5	2	2	0	1	1	0	0	0	0	0	0	0	0	0	0	No	7	2	0	2	2	0	0	1	0	1	0
1	1871	Shandong	1	2	2	19	163	61	22.9591	1	1	1		1			2	3	23:00:00	1	06:30:00	6.5	3	0	0	1	1	1	0	0	0	0	0	0	0	0	0	No	3	0	1	1	0	0	0	1	1	0	1
2	1872	Shandong	1	2	2	21	172	50	16.901	1	1	1		1			1	1	22:30:00	1	06:30:00	7.5	4	1	0	0	0	0	0	0	0	0	0	0	0	0	0	No	2	1	1	0	0	0	0	0	1	0	0
2	1873	Shandong	1	2	2	18	163	65	24.4646	1	1	1		1			3	3	22:30:00	0	6:20	7.5	4	1	0	0	0	0	0	0	0	0	0	0	0	0	0	No	1	1	0	0	0	0	0	0	1	0	0
1	1874	Shandong	1	2	2	19	160	50	19.5312	1	1	1		1			2	1	23:00:00	2	6:00	6.5	3	1	0	0	1	1	1	2	0	0	0	0	0	0	0	No	6	1	2	1	0	1	0	1	1	1	0
1	1875	Shandong	1	2	1	18	180	52	16.0494	1	1	1		1			3	1	22:40:00	0	06:40:00	6.5	3	1	0	0	0	0	0	0	0	0	0	0	1	0	0	No	4	1	0	1	1	1	0	0	1	0	0
1	1876	Shandong	1	1	2	18	160	80	31.25	1	1	1		1			3	1	23:30:00	0	06:40:00	6.5	3	0	0	1	1	0	0	0	0	0	1	0	0	0	0	No	3	0	0	1	0	1	0	1	1	0	0
1	1877	Shandong	1	2	1	20	178	80	25.2493	1	1	1		1			2	3	22:30:00	1	06:30:00	6.5	3	1	0	2	1	1	0	0	0	0	1	0	0	0	0	No	7	1	1	1	1	1	0	2	0	0	0
1	1878	Shandong	1	2	2	18	159	52	20.5688	1	1	1		1			2	3	22:45	0	5:30	5.5	2	1	0	2	1	1	1	0	1	1	2	0	1	0	0	No	8	1	1	2	1	1	0	2	1	0	1
1	1879	Shandong	1	2	2	18	167	75	26.8923	1	1	1		1			4	1	22:30:00	0	6:00	6.5	3	1	0	3	2	2	2	0	0	0	0	0	3	2	3	relationship issues	8	1	1	1	0	2	0	3	1	0	0
1	1880	Shandong	1	2	2	20	158	45	18.026	1	1	1		1			4	1	22:45	0	6:20	6.5	3	1	0	1	1	0	0	0	0	0	0	0	1	0	0	No	4	1	0	1	0	1	0	1	0	0	1
1	1881	Shandong	1	1	1	19	185	110	32.1402	1	1	1		1			2	1	22:50:00	0	5:30	6.5	3	0	0	0	0	1	1	1	0	3	2	2	0	0	0	No	3	0	1	1	0	1	0	0	1	0	0
1	1882	Shandong	1	2	2	19	162	60	22.8624	1	1	1		1			1	1	21:54:00	2	06:35:00	5.5	2	2	0	3	1	2	2	2	3	1	2	2	2	2	1	staying up late to work or study	13	2	2	2	3	2	0	2	0	1	1
1	1883	Shandong	1	1	2	18	166	55	19.9594	1	1	1		1			3	1	00:00:00	1	06:45:00	5.5	2	2	0	3	3	2	0	3	0	0	1	1	2	3	0	No	12	2	2	2	1	2	0	3	1	1	1
1	1884	Shandong	1	2	2	19	160	46	17.9688	1	1	1		1			1	3	23:00:00	0	06:30:00	5.5	2	1	0	0	1	1	2	1	0	0	0	0	1	0	1	No	8	1	1	2	2	1	0	1	1	1	1
1	1885	Shandong	1	2	2	20	168	70	24.8016	1	1	1		1			4	1	22:40:00	1	06:30:00	6.5	3	2	0	2	1	1	2	2	0	0	2	1	1	0	0	No	8	2	1	1	1	1	0	2	0	0	1
1	1886	Shandong	1	2	2	20	157	55	22.3133	3	1	1		1			1	3	23:30:00	0	06:30:00	5.5	2	1	0	2	1	1	1	0	1	0	1	1	1	1	0	No	8	1	1	2	1	1	0	2	1	1	1
1	1887	Shandong	1	2	2	19	172	75	25.3515	1	1	1		1			1	3	22:30:00	1	5:30	6.5	3	1	0	1	1	1	1	0	0	0	1	1	0	0	0	No	5	1	1	1	0	1	0	1	1	0	0
1	1888	Shandong	1	2	2	19	162	50	19.052	1	1	1		1			2	1	23:00:00	1	6:00	5.5	2	1	0	0	2	0	1	0	0	0	0	0	0	0	0	No	7	1	1	2	1	1	0	1	0	0	1
2	1889	Shandong	1	2	2	20	162	55	20.9572	1	1	1		1			1	3	23:00:00	0	6:25	7.5	4	1	0	3	1	0	1	0	0	0	1	0	1	1	0	No	4	1	0	0	0	1	0	2	1	0	0
1	1890	Shandong	1	2	2	19	159	60	23.7332	1	1	1		1			3	3	22:30:00	0	5:30	6.5	3	0	0	3	1	0	0	0	0	0	0	0	3	0	0	No	4	0	0	1	0	1	0	2	0	0	0
1	1891	Shandong	1	2	1	19	178	80	25.2493	1	1	1		1			4	3	00:00:00	0	07:00:00	5.5	2	0	0	0	1	0	0	1	0	0	0	0	0	0	0	No	5	0	0	2	1	1	0	1	1	0	0
2	1892	Shandong	1	2	1	19	181	70	21.3669	1	1	1		1			3	1	22:30:00	0	07:10:00	9.5	6	0	0	0	0	0	0	0	0	0	0	0	0	0	0	No	0	0	0	0	0	0	0	0	1	1	1
1	1893	Shandong	1	1	2	20	160	46	17.9688	1	1	1		1			2	3	22:30:00	0	06:30:00	6.5	3	0	0	1	1	0	0	0	0	0	0	0	0	0	0	No	3	0	0	1	1	0	0	1	1	0	0
1	1894	Shandong	1	2	2	19	162	59	22.4813	1	1	1		1			3	1	23:00:00	0	6:15	5.5	2	1	0	3	1	0	0	0	0	0	2	0	1	0	0	No	7	1	0	2	1	1	0	2	1	0	0
1	1895	Shandong	1	1	1	18	175	67	21.8776	1	1	1		2	1	2	1	1	22:50:00	1	06:30:00	5.5	2	1	0	3	1	0	1	1	0	0	0	0	0	0	0	No	9	1	1	2	2	1	0	2	0	0	1
2	1896	Shandong	1	2	2	19	165	50	18.3655	1	1	1		1			2	3	22:30:00	0	6:50	7.5	4	1	0	1	0	0	0	0	0	0	0	0	0	0	0	No	2	1	0	0	0	0	0	1	1	0	0
1	1897	Shandong	1	2	2	17	168	52	18.424	1	1	1		1			3	1	22:40:00	1	06:35:00	6.5	3	0	0	0	0	0	0	0	0	0	0	0	0	0	0	No	3	0	1	1	1	0	0	0	1	0	0
1	1898	Shandong	1	2	2	19	165	62	22.7732	1	1	1		1			2	3	22:50:00	0	06:30:00	6.5	3	2	1	3	2	1	1	0	1	0	0	0	0	0	0	No	9	2	1	1	0	1	1	3	0	0	0
1	1899	Shandong	1	2	2	19	164	45	16.7311	1	1	1		1			2	1	23:00:00	1	06:30:00	5.5	2	1	0	2	2	0	2	1	2	1	2	2	1	1	0	No	10	1	1	2	2	2	0	2	1	1	0
1	1900	Shandong	1	2	2	18	171	57	19.4932	1	1	1		1			2	3	22:10:00	1	06:45:00	6.5	3	1	0	2	1	1	2	0	2	0	1	0	0	0	2	the dormitory environment affects sleep	7	1	1	1	1	1	0	2	0	0	0
1	1901	Shandong	1	2	2	20	170	52	17.9931	1	1	1		1			1	3	00:30:00	1	06:30:00	5.5	2	2	0	2	3	2	0	0	1	0	1	1	2	1	0	No	10	2	2	2	0	1	0	3	1	0	1
1	1902	Shandong	1	2	1	18	178	65	20.5151	1	1	1		1			3	3	23:00:00	0	06:40:00	6.5	3	1	0	1	0	0	2	1	0	1	0	0	1	0	0	No	4	1	0	1	0	1	0	1	0	1	1
1	1903	Shandong	1	1	1	20	179	65	20.2865	1	1	1		1			3	1	23:00:00	3	07:00:00	5.5	2	2	0	2	2	0	0	1	0	1	1	0	1	1	1	No	11	2	2	2	2	1	0	2	1	1	1
1	1904	Shandong	1	2	2	20	162	60	22.8624	1	1	1		1			2	3	23:00:00	0	06:20:00	6.5	3	0	0	0	1	0	0	1	0	1	0	0	0	0	0	No	3	0	0	1	0	1	0	1	0	0	0
1	1905	Shandong	1	2	2	19	164	52	19.3337	1	1	1		1			2	3	23:00:00	2	06:40:00	3	1	1	0	0	0	0	0	1	0	0	1	1	1	0	1	the dormitory environment affects sleep	9	1	1	3	3	1	0	0	0	0	0
2	1906	Shandong	1	1	1	19	178	65	20.5151	1	1	1		1			3	2	22:30:00	0	06:40:00	7.5	4	0	0	0	0	0	0	3	0	0	0	0	0	0	0	No	1	0	0	0	0	1	0	0	0	0	0
1	1907	Shandong	1	2	1	18	160	62	24.2188	1	1	1		1			2	3	23:30:00	0	06:30:00	6.5	3	0	0	0	1	0	0	0	0	0	0	0	0	0	0	No	2	0	0	1	0	0	0	1	1	0	0
1	1908	Shandong	1	2	2	19	167	62.5	22.4103	1	1	1		1			3	1	22:50:00	0	6:10	6.5	3	1	0	0	1	0	0	1	0	0	0	0	0	0	0	No	4	1	0	1	0	1	0	1	0	0	1
2	1909	Shandong	1	2	1	21	180	110	33.9506	1	1	1		1			1	1	23:00:00	0	06:40:00	7.5	4	1	0	2	2	0	0	0	0	3	0	0	0	0	0	No	4	1	0	0	0	1	0	2	0	0	0
2	1910	Shandong	1	2	2	19	161	48	18.5178	1	1	1		1			4	1	22:30:00	0	06:30:00	7.5	4	1	0	2	1	0	1	0	0	0	0	1	1	0	1	No	4	1	0	0	0	1	0	2	1	0	0
1	1911	Shandong	1	2	2	19	160	55	21.4844	1	1	1		1			3	1	23:00:00	0	06:30:00	6.5	3	1	0	0	0	0	0	0	0	0	0	0	0	0	0	No	2	1	0	1	0	0	0	0	0	0	0
1	1912	Shandong	1	2	2	18	162	64	24.3865	1	1	1		1			2	3	00:00:00	0	06:30:00	6.5	3	1	0	3	2	0	0	0	0	0	3	0	0	2	0	No	6	1	0	1	0	1	0	3	0	1	0
1	1913	Shandong	1	2	2	20	158	50	20.0288	1	1	1		1			4	3	23:30:00	0	06:35:00	6.5	3	2	0	0	0	0	0	0	0	0	0	0	0	0	0	No	3	2	0	1	0	0	0	0	1	0	0
1	1914	Shandong	1	2	2	19	161	64	24.6904	1	1	1		1			4	3	22:00	3	6:50	5.5	2	2	1	2	1	0	3	0	0	0	3	0	0	0	0	No	13	2	2	2	3	1	1	2	1	1	0
2	1915	Shandong	1	2	2	18	170	72	24.9135	1	1	1		1			2	3	22:30:00	1	6:20	7.5	4	2	0	2	1	1	1	0	0	1	1	1	0	1	0	No	6	2	1	0	0	1	0	2	1	0	0
2	1916	Shandong	1	2	1	18	181	72	21.9774	1	1	1		2	1	5	3	3	22:20:00	0	06:40:00	7.5	4	0	0	0	0	0	0	1	0	0	0	0	0	0	0	No	1	0	0	0	0	1	0	0	0	0	0
2	1917	Shandong	1	1	2	19	165	45	16.5289	1	1	1		1			1	1	22:30:00	0	06:30:00	7.5	4	0	0	0	0	0	0	0	0	0	0	0	0	0	0	No	0	0	0	0	0	0	0	0	1	0	0
1	1918	Shandong	1	2	2	19	158	49	19.6283	1	1	1		1			3	1	23:00:00	1	6:00	6.5	3	2	0	1	1	2	0	0	2	0	0	0	0	0	0	No	7	2	2	1	0	1	0	1	0	0	0
2	1919	Shandong	1	2	2	19	165	65	23.8751	1	1	1		1			4	2	22:30:00	1	06:40:00	7.5	4	0	0	0	0	0	0	1	0	2	1	1	1	0	0	No	2	0	1	0	0	1	0	0	0	0	0
1	1920	Shandong	1	2	2	19	162	51	19.433	1	1	1		1			3	1	22:30:00	0	06:30:00	6.5	3	0	0	1	1	1	0	0	0	0	0	0	0	0	0	No	4	0	1	1	1	0	0	1	1	0	0
2	1921	Shandong	1	2	2	19	160	60	23.4375	3	1	1		1			4	1	23:00:00	0	06:30:00	7.5	4	1	0	0	0	0	0	0	0	0	0	0	0	0	0	No	1	1	0	0	0	0	0	0	0	0	0
1	1922	Shandong	1	2	1	19	175	74	24.1633	1	1	1		2	1	1	3	3	23:00:00	0	6:15	6.5	3	1	0	0	1	0	1	3	3	3	3	0	0	0	0	No	5	1	0	1	0	2	0	1	1	1	0
1	1923	Shandong	1	2	2	18	163	62	23.3355	1	1	1		1			1	1	23:00:00	0	06:30:00	6.5	3	1	0	0	1	0	0	0	0	0	0	0	0	0	0	No	3	1	0	1	0	0	0	1	1	1	0
2	1924	Shandong	1	2	2	19	162	75	28.578	1	1	1		1			4	3	23:00:00	0	06:40:00	7.5	4	0	0	1	0	0	0	0	0	0	0	0	0	0	0	No	1	0	0	0	0	0	0	1	0	1	0
2	1925	Shandong	1	2	2	19	155	60	24.974	2	1	1		1			1	1	23:00:00	1	06:30:00	7.5	4	1	0	2	1	1	1	0	0	1	2	0	1	0	0	No	5	1	1	0	0	1	0	2	1	1	0
1	1926	Shandong	1	2	2	18	162	61	23.2434	1	1	1		1			3	1	22:30:00	0	6:25	5.5	2	1	0	2	1	0	0	0	0	1	1	0	0	0	0	No	8	1	0	2	2	1	0	2	1	0	0
2	1927	Shandong	1	2	2	18	160	56	21.875	1	1	1		1			3	3	23:00:00	1	06:48:00	7.5	4	1	0	2	1	0	1	1	0	0	0	0	0	0	0	No	5	1	1	0	0	1	0	2	1	0	0
1	1928	Shandong	1	2	2	19	168	60	21.2585	1	1	1		1			1	1	23:00:00	0	5:30	6.5	3	1	0	0	1	0	0	0	0	0	0	0	0	0	0	No	3	1	0	1	0	0	0	1	0	1	0
2	1929	Shandong	1	1	2	17	163	55	20.7008	1	1	1		1			3	3	22:35	0	6:25	7.5	4	1	0	3	2	0	0	0	0	0	1	1	2	0	0	No	5	1	0	0	0	1	0	3	0	0	1
1	1930	Shandong	1	2	2	18	155	51	21.2279	1	1	1		1			3	3	23:00:00	2	6:20	4.5	1	2	0	3	2	3	1	0	0	0	2	1	1	0	1	repeated thoughts in bed	15	2	3	3	3	1	0	3	0	0	0
1	1931	Shandong	1	2	1	19	178	77	24.3025	1	1	1		1			2	3	22:00	1	05:20:00	5.5	2	2	0	2	1	2	2	3	0	0	2	0	0	2	2	the dormitory environment affects sleep	11	2	2	2	1	2	0	2	1	0	1
1	1932	Shandong	1	2	2	18	160	58	22.6562	1	1	1		1			2	3	22:00	3	06:40:00	6.5	3	0	0	0	1	0	0	0	0	0	0	0	0	0	0	No	5	0	2	1	1	0	0	1	1	0	0
1	1933	Shandong	1	2	2	18	166	58	21.048	1	1	1		1			4	1	21:55:00	1	06:30:00	6.5	3	1	0	1	1	1	0	0	0	0	0	0	0	1	2	the dormitory environment affects sleep	6	1	1	1	1	1	0	1	0	0	0
2	1934	Shandong	1	2	2	19	158	45	18.026	1	1	1		1			2	2	22:30:00	0	06:30:00	7.5	4	0	0	1	1	0	0	0	0	0	0	0	3	0	0	No	2	0	0	0	0	1	0	1	1	0	0
1	1935	Shandong	1	1	1	19	183	83	24.7843	1	1	1		1			3	1	22:00	3	6:50	6.5	3	1	0	3	2	1	0	1	0	0	1	0	1	0	0	No	10	1	2	1	2	1	0	3	1	0	0
2	1936	Shandong	1	2	2	20	160	40	15.625	1	1	1		1			2	3	22:30:00	1	6:25	7.5	4	2	0	2	2	2	1	0	0	0	0	0	3	0	0	No	7	2	2	0	0	1	0	2	1	0	0
1	1937	Shandong	1	2	1	19	181	72	21.9774	1	1	1		1			3	3	21:30	3	6:05	6.5	3	2	0	3	1	0	0	0	0	0	0	0	0	0	0	No	8	2	2	1	1	0	0	2	1	0	0
1	1938	Shandong	1	2	2	21	160	45	17.5781	4	1	1		1			3	3	23:00:00	0	6:00	6.5	3	0	0	0	1	0	3	0	0	0	0	0	0	0	0	No	3	0	0	1	0	1	0	1	0	0	0
1	1939	Shandong	1	2	1	18	170	55	19.0311	1	1	1		1			1	1	23:00:00	0	06:30:00	6.5	3	2	0	3	3	2	2	1	0	0	0	0	2	0	0	No	8	2	1	1	0	1	0	3	0	1	0
2	1940	Shandong	1	2	2	19	161	62	23.9188	1	1	1		1			3	3	22:10:00	0	06:30:00	7.5	4	0	0	1	0	0	1	0	0	0	0	0	1	0	0	No	2	0	0	0	0	1	0	1	0	0	0
1	1941	Shandong	2	2	1	18	180	60	18.5185	1	2	1		1			1	1	22:30:00	0	6:20	6.5	3	0	0	0	0	0	0	0	0	0	0	0	0	0	0	No	2	0	0	1	1	0	0	0	1	0	0
2	1942	Shandong	1	1	2	19	163	58	21.83	1	1	1		1			3	2	22:40:00	0	06:35:00	7.5	4	1	0	2	1	0	1	1	0	0	1	1	3	0	0	No	4	1	0	0	0	1	0	2	1	1	1
1	1943	Shaanxi	1	2	2	19	155	47	19.563	1	1	1		1			4	3	23:00:00	1	6:25	6.5	3	1	0	1	1	1	1	2	0	0	2	0	0	0	0	No	5	1	1	1	0	1	0	1	1	1	0
1	1944	Shandong	1	2	2	20	163	54	20.3244	1	1	1		2	1	1	3	2	23:30:00	2	06:30:00	4.5	1	1	0	3	2	2	1	1	0	0	1	0	1	0	0	No	13	1	2	3	3	1	0	3	0	1	0
1	1945	Shandong	1	2	2	18	161	50	19.2894	1	1	1		1			2	3	21:55:00	1	6:20	6.5	3	1	0	2	1	1	0	0	0	0	0	0	1	0	0	No	7	1	1	1	1	1	0	2	1	0	0
1	1946	Shandong	1	2	2	19	163	54	20.3244	1	1	1		1			2	1	21:50:00	0	06:30:00	6.5	3	1	0	2	2	1	2	2	0	0	0	0	1	0	0	No	7	1	1	1	1	1	0	2	1	0	0
1	1947	Shandong	1	2	2	18	158	47	18.8271	1	1	1		1			2	1	22:30:00	0	06:30:00	6.5	3	1	0	3	1	0	0	0	0	0	1	1	1	0	0	No	6	1	0	1	1	1	0	2	1	0	0
1	1948	Shandong	1	2	2	20	165	50	18.3655	1	1	1		1			3	3	22:40:00	1	06:30:00	5.5	2	1	0	2	2	2	1	1	0	2	1	1	1	1	0	No	10	1	2	2	2	1	0	2	0	0	1
1	1949	Shandong	1	2	2	19	150	42	18.6667	1	1	1		1			1	3	23:05	0	06:32:00	6.5	3	1	0	2	1	0	0	0	0	0	0	0	2	0	0	No	5	1	0	1	0	1	0	2	0	1	0
1	1950	Shandong	1	2	2	18	167	50	17.9282	1	1	1		1			2	3	23:00:00	1	06:30:00	6.5	3	2	0	2	1	2	0	0	0	0	0	0	0	0	0	No	7	2	2	1	0	0	0	2	1	0	0
1	1951	Shandong	1	2	2	18	165	85	31.2213	1	1	1		1			2	1	21:30	1	5:30	6.5	3	2	0	2	1	1	3	0	0	3	2	0	2	0	2	the dormitory environment affects sleep	9	2	1	1	1	2	0	2	0	0	0
1	1952	Shandong	1	1	2	19	162	52	19.8141	1	1	1		1			2	3	22:30:00	1	06:40:00	5.5	2	1	0	0	0	2	0	0	0	0	0	0	0	0	0	No	7	1	2	2	2	0	0	0	0	1	0
1	1953	Shandong	1	2	1	18	176	56	18.0785	1	1	1		1			2	1	22:30:00	0	6:00	6.5	3	1	0	1	0	0	0	1	0	3	0	0	2	0	0	No	4	1	0	1	0	1	0	1	1	1	0
1	1954	Shandong	1	2	2	18	160	49	19.1406	1	1	1		1			4	1	23:30:00	0	06:30:00	6.5	3	1	0	1	1	0	0	0	0	0	1	0	0	0	0	No	4	1	0	1	0	1	0	1	1	0	0
1	1955	Shandong	1	1	2	18	165	64	23.5078	1	1	1		1			2	1	23:00:00	0	05:50:00	6.5	3	1	0	1	1	0	2	0	0	0	0	1	0	0	0	No	4	1	0	1	0	1	0	1	1	0	1
2	1956	Shandong	1	2	2	19	167	90	32.2708	1	1	1		1			3	3	23:00:00	0	06:40:00	7.5	4	0	0	0	0	0	0	0	0	0	0	0	0	0	0	No	0	0	0	0	0	0	0	0	1	0	0
1	1957	Shandong	1	2	2	18	163	43	16.1843	1	1	1		1			2	3	23:00:00	1	06:30:00	6.5	3	2	0	2	1	2	1	2	0	0	0	0	3	1	1	the dormitory environment affects sleep	8	2	2	1	0	1	0	2	1	1	0
1	1958	Shandong	1	2	2	18	158	44	17.6254	1	1	1		1			2	3	23:00:00	1	6:20	6.5	3	1	0	0	1	1	3	0	0	0	0	0	0	0	0	No	5	1	1	1	0	1	0	1	1	0	1
1	1959	Shandong	1	2	2	18	162	53	20.1951	1	1	1		1			2	1	23:00:00	2	06:30:00	5.5	2	3	0	3	0	3	3	2	1	0	3	0	2	0	3	the dormitory environment affects sleep	14	3	3	2	2	2	0	2	0	1	0
1	1960	Shandong	1	2	2	18	165	60	22.0386	1	1	1		1			1	2	22:30:00	1	06:03:00	6.5	3	0	0	0	0	0	0	0	0	0	0	0	0	0	0	No	2	0	1	1	0	0	0	0	1	0	0
1	1961	Shandong	1	2	2	18	170	63	21.7993	1	1	1		1			2	3	23:00:00	0	6:00	6.5	3	2	0	3	1	1	2	2	0	0	0	0	1	0	0	No	7	2	1	1	0	1	0	2	0	0	1
1	1962	Shandong	1	2	2	20	160	55	21.4844	1	1	1		1			2	2	23:30:00	0	5:30	6.5	3	1	2	3	3	0	0	0	0	3	1	0	0	0	0	No	8	1	0	1	0	1	2	3	1	0	0
1	1963	Shandong	1	2	2	19	150	53	23.5556	1	1	1		1			2	1	22:40:00	1	06:20:00	6.5	3	1	0	3	1	2	0	0	0	0	3	2	0	0	0	No	7	1	2	1	0	1	0	2	0	0	0
1	1964	Shandong	1	2	2	19	164	47	17.4747	1	1	1		1			3	3	23:00:00	0	06:40:00	6.5	3	1	0	2	1	0	0	0	0	0	0	0	2	0	1	staying up late to work or study	5	1	0	1	0	1	0	2	0	0	0
2	1965	Shandong	1	2	1	18	178	60	18.937	1	1	1		1			2	3	22:30:00	0	06:40:00	7.5	4	1	0	1	0	0	0	0	0	0	0	0	0	0	0	No	2	1	0	0	0	0	0	1	1	0	0
1	1966	Shandong	1	2	2	18	165	80	29.3848	1	1	1		1			2	3	23:10:00	1	06:30:00	6.5	3	1	0	2	1	1	1	0	0	0	1	0	0	0	0	No	6	1	1	1	0	1	0	2	1	0	0
2	1967	Shandong	1	2	2	17	167	60	21.5139	1	1	1		1			3	1	22:40:00	0	06:30:00	7.5	4	0	0	1	0	0	0	0	0	0	0	0	0	0	0	No	1	0	0	0	0	0	0	1	1	0	0
1	1968	Shandong	1	2	2	19	165	95	34.8944	1	1	1		1			3	2	23:00:00	2	06:30:00	6.5	3	0	0	2	1	0	0	0	0	2	1	0	0	0	0	No	5	0	1	1	0	1	0	2	1	0	0
1	1969	Shandong	1	2	2	20	160	55	21.4844	1	1	1		1			2	1	22:50:00	1	06:30:00	6.5	3	0	0	0	0	0	0	0	0	0	0	0	0	0	0	No	2	0	1	1	0	0	0	0	1	0	1
1	1970	Shandong	1	2	2	18	163	75	28.2284	7	1	1		1			2	3	21:54:00	1	6:10	4.5	1	2	0	1	1	2	0	1	1	0	1	0	0	0	0	No	12	2	2	3	3	1	0	1	0	1	0
1	1971	Shandong	1	2	1	19	170	61	21.1073	1	1	1		1			1	2	22:30:00	1	06:30:00	6.5	3	2	0	3	3	2	2	2	0	2	3	0	0	1	0	No	11	2	2	1	1	2	0	3	0	0	1
1	1972	Shandong	1	2	2	18	167	44	15.7768	1	1	1		1			2	3	23:00:00	0	06:40:00	5.5	2	2	0	2	1	2	3	0	2	0	2	3	2	1	3	the dormitory environment affects sleep	11	2	1	2	2	2	0	2	0	0	1
1	1973	Shandong	1	2	1	18	179	64	19.9744	1	1	1		1			3	3	23:00:00	0	6:20	6.5	3	1	0	1	0	0	1	2	0	0	3	0	0	0	1	Sickness	4	1	0	1	0	1	0	1	0	0	0
2	1974	Shandong	1	2	2	19	169	58	20.3074	1	1	1		1			2	3	22:30:00	2	06:30:00	7.5	4	1	0	0	0	2	3	0	0	0	0	0	1	0	0	No	4	1	2	0	0	1	0	0	0	1	0
1	1975	Shandong	1	2	2	18	163	52	19.5717	1	1	1		1			2	3	00:00:00	0	6:00	5.5	2	1	0	3	0	0	0	0	0	0	0	0	0	0	0	No	5	1	0	2	0	0	0	2	1	1	0
1	1976	Shandong	1	2	1	20	180	60	18.5185	1	1	1		1			2	3	22:30:00	0	06:30:00	6.5	3	1	0	0	0	0	0	0	0	0	0	0	0	0	0	No	3	1	0	1	1	0	0	0	0	0	1
2	1977	Shandong	1	2	2	18	162	50	19.052	1	1	1		1			3	1	22:00	0	06:30:00	8.5	5	0	0	0	0	0	0	0	0	0	0	0	0	0	0	No	0	0	0	0	0	0	0	0	1	0	0
1	1978	Shandong	1	2	2	18	167	55	19.721	1	1	1		1			2	1	23:00:00	1	6:20	6.5	3	1	0	2	1	0	1	1	0	0	0	0	1	0	0	No	6	1	1	1	0	1	0	2	1	0	0
1	1979	Shandong	1	2	2	18	160	74	28.9062	1	1	1		2	1	1	3	3	23:30:00	0	06:30:00	6.5	3	1	0	0	0	0	0	0	0	1	2	0	0	0	0	No	3	1	0	1	0	1	0	0	1	1	0
2	1980	Shandong	1	2	2	18	162	55	20.9572	1	1	1		1			2	2	22:15:00	1	06:30:00	7.5	4	1	0	0	1	1	0	0	1	0	1	0	0	1	0	No	4	1	1	0	0	1	0	1	1	0	0
1	1981	Shandong	1	2	2	19	164	65	24.1672	1	1	1		1			3	2	23:00:00	0	06:30:00	6.5	3	1	0	2	2	0	1	1	1	0	0	0	0	0	0	No	5	1	0	1	0	1	0	2	1	0	0
2	1982	Shandong	1	2	2	19	162	57	21.7193	1	1	1		1			3	1	22:30:00	0	06:30:00	7.5	4	0	0	0	0	0	0	0	0	0	0	0	0	0	0	No	0	0	0	0	0	0	0	0	0	0	0
1	1983	Shandong	1	2	1	18	173	78	26.0617	1	1	1		2	1	2	3	1	22:40:00	2	6:20	6.5	3	1	0	1	1	2	2	0	0	0	2	0	0	0	0	No	6	1	2	1	0	1	0	1	0	0	1
2	1984	Shandong	1	2	1	18	180	79	24.3827	1	1	1		1			2	2	21:50	0	6:00	7.5	4	0	0	0	0	0	0	0	0	0	0	0	0	0	0	No	0	0	0	0	0	0	0	0	0	0	0
1	1985	Shandong	1	2	2	21	170	55	19.0311	1	1	1		1			2	1	22:00	3	06:30:00	4.5	1	2	0	2	1	3	1	0	0	0	3	0	2	1	2	the dormitory environment affects sleep	14	2	3	3	3	1	0	2	0	0	0
1	1986	Shandong	1	2	2	19	165	50	18.3655	1	1	1		1			3	1	23:30:00	0	06:35:00	5.5	2	1	0	1	1	0	0	3	0	0	0	2	0	0	0	No	6	1	0	2	1	1	0	1	1	0	1
1	1987	Shandong	1	2	2	18	169	65	22.7583	1	1	1		1			1	1	23:00:00	0	6:50	6.5	3	1	0	2	1	0	0	2	0	0	2	0	0	0	0	No	6	1	0	1	1	1	0	2	0	0	0
1	1988	Shandong	1	2	2	18	166	55	19.9594	1	1	1		1			1	3	23:10:00	0	6:20	6.5	3	0	0	1	0	0	0	0	0	0	0	0	0	0	0	No	2	0	0	1	0	0	0	1	1	1	1
1	1989	Shandong	1	2	2	18	172	65	21.9713	1	1	1		1			1	3	23:00:00	0	06:30:00	6.5	3	1	0	1	1	0	0	0	0	0	0	0	1	0	0	No	4	1	0	1	0	1	0	1	1	1	1
1	1990	Shandong	1	2	1	18	180	90	27.7778	1	1	1		1			2	1	22:30:00	0	7:30	5.5	2	1	0	0	0	0	0	0	0	0	0	0	0	0	0	No	6	1	0	2	3	0	0	0	1	1	0
1	1991	Shandong	1	2	2	18	175	90	29.3878	4	1	1		1			2	2	23:00:00	1	06:45:00	4.5	1	0	0	1	1	2	2	1	0	0	1	1	0	0	0	No	10	0	2	3	3	1	0	1	1	0	1
1	1992	Shandong	1	2	1	17	173	53	17.7086	1	1	1		1			3	1	23:00:00	0	06:30:00	6.5	3	0	0	2	1	0	0	0	0	0	0	0	0	1	0	No	4	0	0	1	0	1	0	2	1	0	0
1	1993	Shandong	1	2	2	19	156	50	20.5457	1	1	1		1			2	1	23:00:00	1	6:20	6.5	3	1	0	2	1	1	0	3	0	1	1	1	2	1	0	No	6	1	1	1	0	1	0	2	1	0	0
1	1994	Shandong	1	2	2	18	170	62	21.4533	1	1	1		1			2	3	22:30:00	0	06:40:00	6.5	3	1	0	2	1	0	0	0	0	0	0	0	0	0	0	No	5	1	0	1	1	0	0	2	1	0	0
1	1995	Shandong	1	3	2	18	166	54	19.5965	1	1	1		1			4	1	22:50:00	1	06:29:00	6.5	3	1	0	3	1	1	1	0	1	0	1	1	0	0	0	No	6	1	1	1	0	1	0	2	1	1	0
1	1996	Shandong	1	1	1	20	175	70	22.8571	7	1	1		2	1	1	1	1	1:30	0	6:50	4.5	1	2	0	3	0	0	0	3	0	0	0	0	0	0	0	No	9	2	0	3	1	1	0	2	1	1	1
1	1997	Shandong	1	3	2	19	170	60	20.7612	1	2	1		1			2	3	23:00:00	1	06:30:00	6.5	3	2	0	2	1	2	1	0	0	0	0	0	0	0	0	No	8	2	2	1	0	1	0	2	1	0	0
1	1998	Shandong	1	3	2	19	169	52	18.2066	1	1	1		1			2	1	23:00:00	0	6:20	6.5	3	1	0	1	1	0	1	1	1	1	1	2	1	1	0	No	4	1	0	1	0	1	0	1	1	0	0
[truncated: 144 more rows]
[truncated: 9 more columns]
